# Supplementary material for: Cobalt(iii)-catalyzed C–H amidation of weakly coordinating sulfoxonium ylides and α-benzoylketene dithioacetals
Source: Royal Society of Chemistry journal article supplement (doi:10.1039/c8qo01270a), 2019-01-01
Supplement: c8qo01270a1.pdf [file c8qo01270a1.pdf]

## *Electronic Supplementary Information*

### **Cobalt(III)-Catalyzed C-H Amidation of Weakly Coordinating**

### **Sulfoxonium Ylides and $\alpha$ -Benzoylketene Dithioacetals**

Qingqian Jia,<sup>a</sup> Lingheng Kong,<sup>\*b</sup> Xingwei Li<sup>\*a,b</sup>

<sup>a</sup> Henan Key Laboratory of Organic Functional Molecule and Drug Innovation, Collaborative Innovation Center of Henan Province for Green Manufacturing of Fine Chemicals, School of Chemistry and Chemical Engineering, Henan Normal University, Xinxiang 453007, China

<sup>b</sup> School of Chemistry and Chemical Engineering Shaanxi Normal University, Xi'an 710062, China

### **Contents**

|                                                  |          |
|--------------------------------------------------|----------|
| Table of Contents                                | S1       |
| Experimental Section: General Considerations     | S2       |
| General Procedure for Preparation of Substrates  | S3       |
| Gram-Scale Synthesis of <b>3aa</b> and <b>5a</b> | S4       |
| Characterization Data of Products                | S5-S26   |
| Derivatization Reactions                         | S27-S28  |
| KIE Experiments                                  | S29-S30  |
| NMR Spectra                                      | S31-S102 |
| References                                       | S102     |

## Experimental Section

**General Considerations:** All the reactions were carried out under argon atmosphere using standard Schlenk technique. The  $^1\text{H}$  NMR spectra were recorded on a 400 MHz or 600 MHz NMR spectrometer. The  $^{13}\text{C}$  NMR spectra were recorded at 100 MHz or 150 MHz. The  $^{19}\text{F}$  NMR spectra were recorded at 565 MHz. The residual solvent signals were used as references and the chemical shifts were converted to the TMS scale. The coupling constants were given in Hz. HRMS data were obtained using a TOF mode. The conversion of starting materials was monitored by thin layer chromatography (TLC) using silica gel plates (silica gel 60 F254 0.25 mm), and components were visualized under UV light (254 and 365 nm). Column chromatography was performed on silica gel 200-300 mesh. Unless otherwise noted, all other compounds have been reported in the literature or are commercially available. Commercial reagents were used without further purification.

### General Procedure: Preparation of the Substrates

The substrates **1a-1u**,<sup>1</sup> **1a-d<sub>5</sub>**,<sup>1</sup> **2a-2t**,<sup>2</sup> and **4a-4k**<sup>3</sup> were prepared according to the literature reports.

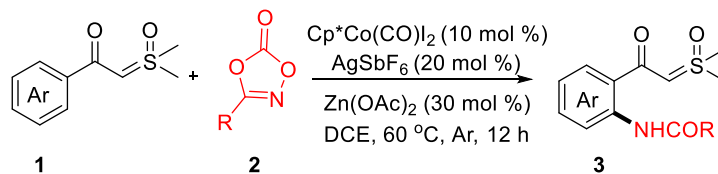

**General procedure for synthesis of 3.** A mixture of sulfoxonium ylide **1** (0.2 mmol), **2** (0.2 mmol),  $\text{Cp}^*\text{Co}(\text{CO})\text{I}_2$  (9.5 mg, 0.02 mmol, 10 mol %),  $\text{AgSbF}_6$  (13.7 mg, 0.04 mmol, 20 mol %) and  $\text{Zn}(\text{OAc})_2$  (11.0 mg, 0.06 mmol, 30 mol %) were added to a Schlenk tube equipped with a stir bar. Dry DCE (2.0 mL) was added and the mixture was stirred at 60 °C for 12 h under Ar atmosphere. Afterwards, the solvent was removed under reduced pressure and the residue was adsorbed onto small amounts of silica. The purification was performed by flash column chromatography on silica gel (eluent: PE/EA = 1:1).

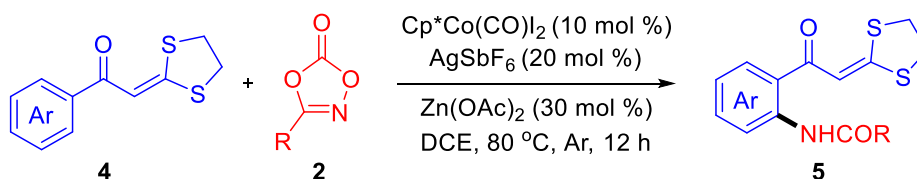

**General procedure for synthesis of 5.** A mixture of ketene dithioacetal **4** (0.2 mmol), amidating reagent **2** (0.2 mmol),  $\text{Cp}^*\text{Co}(\text{CO})\text{I}_2$  (9.5 mg, 0.02 mmol, 10 mol %),  $\text{AgSbF}_6$  (13.7 mg, 0.04 mmol, 20 mol %) and  $\text{Zn}(\text{OAc})_2$  (11.0 mg, 0.06 mmol, 30 mol %) were added to a Schlenk tube equipped with a stir bar. Dry DCE (2.0 mL) was added and the mixture was stirred at 80 °C for 12 h under Ar atmosphere. The solvent was removed under reduced pressure and the residue was adsorbed onto small amounts of silica. The purification was performed by flash column chromatography on silica gel (eluent: PE/EA = 5:1).

**Gram-scale Synthesis of 3aa.** A mixture of **1a** (3.17 mmol), **2a** (3.17 mmol), Cp\*Co(CO)<sub>2</sub> (151.0 mg, 0.317 mmol, 10 mol %), AgSbF<sub>6</sub> (218.0 mg, 0.643 mmol, 20 mol %) and Zn(OAc)<sub>2</sub> (175.0 mg, 0.951 mmol, 30 mol %) were added to a Schlenk tube equipped with a stir bar. Dry DCE (32 mL) was added and the mixture was stirred at 60 °C for 15 h under Ar atmosphere. Afterwards, the solvent was removed under reduced pressure, and the residue was adsorbed onto small amounts of silica. Purification was performed by flash column chromatography on silica gel and moderate yield of 91% (910.0 mg) was attained (eluent: PE/EA = 1:1).

#### **1.5 mmol-Scale Synthesis of 5a**

A mixture of **2a** (1.5 mmol), ketene dithioacetal **4a** (1.5 mmol), Cp\*Co(CO)<sub>2</sub> (71.3 mg, 0.15 mmol, 10 mol %), AgSbF<sub>6</sub> (103.0 mg, 0.3 mmol, 20 mol %) and Zn(OAc)<sub>2</sub> (82.5 mg, 0.45 mmol, 30 mol %) were added to a Schlenk tube equipped with a stir bar. Dry DCE (15 mL) was added and the mixture was stirred at 80 °C for 15 h under Ar atmosphere. Afterwards, the solvent was removed under reduced pressure and the residue was adsorbed onto small amounts of silica. Purification was performed by flash column chromatography on silica gel and moderate yield of 79 % (393.0 mg) was attained (eluent: PE/EA = 5:1).

## Characterization of Products

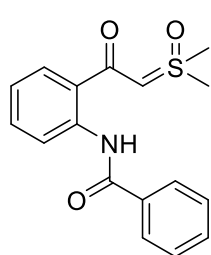

***N*-(2-(2-(dimethyl(oxo)- $\lambda^6$ -sulfanylidene)acetyl)phenyl)benzamide**

**(3aa)**

The title compound was isolated as a pale-yellow solid (PE/EA = 1:1, 59.9 mg, 95%). M.p.: 140-141 °C. <sup>1</sup>H NMR (400 MHz, CDCl<sub>3</sub>)  $\delta$  13.14 (s, 1H), 8.81 (d,  $J$  = 8.4 Hz, 1H), 8.06 (dd,  $J$  = 7.9, 1.5 Hz, 2H), 7.60 (dd,  $J$  = 7.9, 1.3 Hz, 1H), 7.52 - 7.42 (m, 4H), 7.06 - 7.01 (m, 1H), 5.08 (s, 1H), 3.51 (s, 6H). <sup>13</sup>C NMR (150 MHz, CDCl<sub>3</sub>)  $\delta$  185.8, 165.7, 140.2, 135.5, 132.1, 131.6, 128.7, 128.5, 127.6, 124.0, 122.6, 121.1, 72.2, 42.3. HRMS (ESI): Calcd for C<sub>17</sub>H<sub>17</sub>NO<sub>3</sub>S [M+Na]<sup>+</sup> 388.0821, Found: 388.0816.

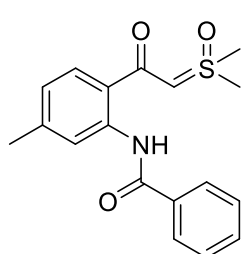

***N*-(2-(2-(dimethyl(oxo)- $\lambda^6$ -sulfanylidene)acetyl)-5-methylphenyl)benzamide (3ba)**

The title compound was isolated as a pale-yellow solid (PE/EA = 1:1, 62.3 mg, 94%). M.p.: 142-143 °C. <sup>1</sup>H NMR (600 MHz, CDCl<sub>3</sub>)  $\delta$  13.24 (s, 1H), 8.69 (s, 1H), 8.10 - 8.04 (m, 2H), 7.56 - 7.45 (m, 4H), 6.85 (dd,  $J$  = 8.0, 1.0 Hz, 1H), 5.04 (s, 1H), 3.51 (s, 6H), 2.40 (s, 3H). <sup>13</sup>C NMR (100 MHz, CDCl<sub>3</sub>)  $\delta$  185.9, 165.7, 142.9, 140.3, 135.6, 131.6, 128.7, 128.5, 127.6, 123.4, 121.4, 121.3, 71.4, 42.4, 22.0. HRMS (ESI): Calcd for C<sub>18</sub>H<sub>19</sub>NO<sub>3</sub>S [M+Na]<sup>+</sup> 352.0978, Found: 352.0981.

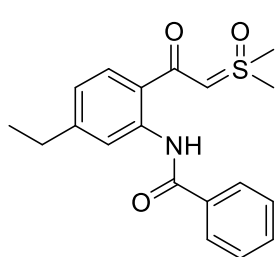

***N*-(2-(2-(dimethyl(oxo)- $\lambda^6$ -sulfanylidene)acetyl)-5-ethylphenyl)benzamide (3ca)**

The title compound was isolated as a white solid (PE/EA = 1:1, 62.3 mg, 90%). M.p.: 160-161 °C. <sup>1</sup>H NMR (600 MHz, CDCl<sub>3</sub>)  $\delta$  13.24 (s, 1H), 8.73 (s, 1H), 8.07 (d,  $J$  = 7.1 Hz, 2H), 7.55 - 7.48 (m, 4H), 6.89 (d,  $J$  = 8.0 Hz, 1H), 5.04 (s, 1H), 3.53 (s, 6H), 2.70 (q,  $J$  = 7.6 Hz, 2H), 1.27 (t,  $J$  = 7.6 Hz, 3H). <sup>13</sup>C NMR (100 MHz, CDCl<sub>3</sub>)  $\delta$  185.8, 165.7, 149.1, 140.5, 135.6, 131.6, 128.7, 128.6, 127.6, 122.2, 121.5, 120.3, 71.4, 42.4, 29.3, 15.4. HRMS (ESI): Calcd for C<sub>19</sub>H<sub>21</sub>NO<sub>3</sub>S [M+Na]<sup>+</sup> 366.1134, Found: 366.1137.

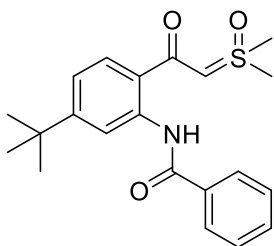

***N*-(5-(tert-butyl)-2-(2-(dimethyl(oxo)- $\lambda^6$ -sulfanylidene)acetyl)phenyl)benzamide (3da)**

The title compound was isolated as a pale-yellow solid (PE/EA = 1:1, 70.7 mg, 94%). M.p.: 126-127 °C.  $^1\text{H}$  NMR (600 MHz,  $\text{CDCl}_3$ )  $\delta$  13.25 (s, 1H), 8.96 (d,  $J = 1.9$  Hz, 1H), 8.12 - 8.05 (m, 2H), 7.55 (d,  $J = 8.3$  Hz, 1H), 7.53 - 7.47 (m, 3H), 7.07 (dd,  $J = 8.3, 1.9$  Hz, 1H), 5.05 (s, 1H), 3.50 (s, 6H), 1.37 (s, 9H).  $^{13}\text{C}$  NMR (100 MHz,  $\text{CDCl}_3$ )  $\delta$  185.7, 165.7, 155.9, 140.4, 135.7, 131.5, 128.7, 128.3, 127.6, 121.2, 119.7, 118.1, 71.4, 42.5, 35.3, 31.2. HRMS (ESI): Calcd for  $\text{C}_{21}\text{H}_{25}\text{NO}_3\text{S}$   $[\text{M}+\text{Na}]^+$  394.1447, Found: 394.1454.

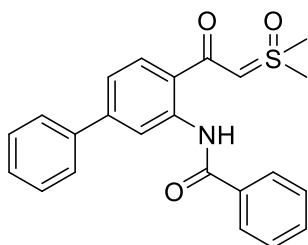

***N*-(4-(2-(dimethyl(oxo)- $\lambda^6$ -sulfanylidene)acetyl)-[1,1'-biphenyl]-3-yl)benzamide (3ea)**

The title compound was isolated as a pale-yellow solid (PE/EA = 1:1, 63.0 mg, 80%). M.p.: 160-161 °C.  $^1\text{H}$  NMR (600 MHz,  $\text{CDCl}_3$ )  $\delta$  13.30 (s, 1H), 9.19 (d,  $J = 1.7$  Hz, 1H), 8.14 - 8.08 (m, 2H), 7.72 (d,  $J = 7.3$  Hz, 2H), 7.68 (d,  $J = 8.2$  Hz, 1H), 7.55 - 7.49 (m, 3H), 7.45 (t,  $J = 7.6$  Hz, 2H), 7.37 (t,  $J = 7.4$  Hz, 1H), 7.30 (dd,  $J = 8.2, 1.8$  Hz, 1H), 5.10 (s, 1H), 3.54 (s, 6H).  $^{13}\text{C}$  NMR (100 MHz,  $\text{CDCl}_3$ )  $\delta$  185.5, 165.8, 144.7, 140.9, 140.2, 135.5, 131.7, 129.0, 128.9, 128.8, 128.1, 127.7, 127.5, 122.6, 121.1, 119.6, 71.8, 42.5. HRMS (ESI): Calcd for  $\text{C}_{23}\text{H}_{21}\text{NO}_3\text{S}$   $[\text{M}+\text{Na}]^+$  414.1134, Found: 414.1126.

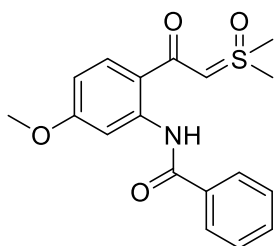

***N*-(2-(2-(dimethyl(oxo)- $\lambda^6$ -sulfanylidene)acetyl)-5-methoxyphenyl)benzamide (3fa)**

The title compound was isolated as a pale-yellow solid (PE/EA = 1:1, 46.0 mg, 66%). M.p.: 176-177 °C.  $^1\text{H}$  NMR (600 MHz, DMSO)  $\delta$  14.16 (s, 1H), 8.41 (d,  $J = 2.6$  Hz, 1H), 7.98 (t,  $J = 12.4$  Hz, 2H), 7.73 (d,  $J = 8.9$  Hz, 1H), 7.69 - 7.49 (m, 3H), 6.67 (dd,  $J = 8.8, 2.6$  Hz, 1H), 5.76 (d,  $J = 5.3$  Hz, 1H), 3.82 (s, 3H), 3.6 (s, 6H).  $^{13}\text{C}$  NMR (100 MHz, DMSO)  $\delta$  183.8, 164.5, 161.4, 141.9, 134.8, 131.9, 130.3, 128.9, 127.0, 116.2, 108.2, 104.6, 75.5, 55.2, 40.5. HRMS (ESI): Calcd for  $\text{C}_{18}\text{H}_{19}\text{NO}_4\text{S}$   $[\text{M}+\text{Na}]^+$  368.0927, Found: 368.0924.

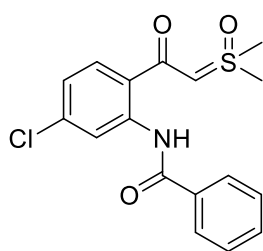

***N*-(5-chloro-2-(2-(dimethyl(oxo)- $\lambda^6$ -sulfanylidene)acetyl)phenyl)benzamide (3ga)**

The title compound was isolated as a pale-yellow solid (PE/EA = 1:1, 64.8 mg, 92%). M.p.: 192-193 °C.  $^1\text{H}$  NMR (600 MHz, DMSO)  $\delta$  14.00 (s, 1H), 8.82 (d,  $J = 2.2$  Hz, 1H), 7.99 - 7.97 (m, 2H), 7.81 (d,  $J = 8.6$  Hz, 1H), 7.67 - 7.60 (m, 3H), 7.19 (dd,  $J = 8.5, 2.1$  Hz, 1H), 5.91 (s, 1H), 3.63 (s, 6H).  $^{13}\text{C}$  NMR (100 MHz, DMSO)  $\delta$  182.6, 164.7, 141.1, 135.6, 134.3, 132.1, 130.2, 129.0, 127.0, 122.2, 122.1, 119.1, 77.5, 40.3. HRMS (ESI): Calcd for  $\text{C}_{17}\text{H}_{16}\text{ClNO}_3\text{S}$   $[\text{M}+\text{Na}]^+$  372.0432, Found: 372.0426.

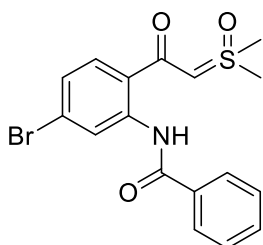

***N*-(5-bromo-2-(2-(dimethyl(oxo)- $\lambda^6$ -sulfanylidene)acetyl)phenyl)benzamide (3ha)**

The title compound was isolated as a white solid (PE/EA = 1:1, 68.8 mg, 86%). M.p.: 211-212 °C.  $^1\text{H}$  NMR (600 MHz, Acetone)  $\delta$  13.92 (s, 1H), 9.16 (d,  $J = 2.0$  Hz, 1H), 8.10 - 8.07 (m, 2H), 7.71 (d,  $J = 8.5$  Hz, 1H), 7.61 (d,  $J = 7.3$  Hz, 1H), 7.57 (t,  $J = 7.4$  Hz, 2H), 7.24 (dd,  $J = 8.4, 2.0$  Hz, 1H), 5.66 (s, 1H), 3.69 (s, 6H).  $^{13}\text{C}$  NMR (100 MHz, Acetone)  $\delta$  184.6, 165.8, 142.8, 136.0, 132.7, 131.0, 129.6, 128.2, 125.8, 125.7, 123.7, 123.5, 76.4, 41.6. HRMS (ESI): Calcd for  $\text{C}_{17}\text{H}_{16}\text{BrNO}_3\text{S}$   $[\text{M}+\text{Na}]^+$  415.9926, Found: 415.9919.

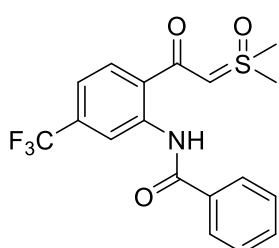

***N*-(2-(2-(dimethyl(oxo)- $\lambda^6$ -sulfanylidene)acetyl)-5-(trifluoromethyl)phenyl)benzamide (3ia)**

The title compound was isolated as a white solid (PE/EA = 1:1, 54.1 mg, 71%). M.p.: 209-210 °C.  $^1\text{H}$  NMR (600 MHz, DMSO)  $\delta$  13.89 (s, 1H), 9.11 (s, 1H), 7.99 (d,  $J = 7.1$  Hz, 3H), 7.68 - 7.60 (m, 3H), 7.47 (d,  $J = 8.2$  Hz, 1H), 5.98 (s, 1H), 3.66 (s, 6H).  $^{13}\text{C}$  NMR (150 MHz, DMSO)  $\delta$  182.5, 165.3, 140.7, 134.7, 132.7, 131.4 (q,  $J_{\text{C-F}} = 31.7$  Hz), 130.0, 129.5, 127.5, 127.4, 124.3 (q,  $J_{\text{C-F}} = 270.8$  Hz), 119.3 (q,  $J_{\text{C-F}} = 2.6$  Hz), 116.7 (q,  $J_{\text{C-F}} = 4.2$  Hz), 79.1, 40.8.  $^{19}\text{F}$  NMR (565 MHz, DMSO)  $\delta$  -61.71. HRMS (ESI): Calcd for  $\text{C}_{18}\text{H}_{16}\text{F}_3\text{NO}_3\text{S}$   $[\text{M}+\text{Na}]^+$  406.0695, Found: 406.0690.

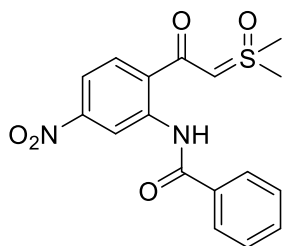

***N*-(2-(2-(dimethyl(oxo)- $\lambda^6$ -sulfanylidene)acetyl)-5-nitrophenyl)benzamide (3ja)**

The title compound was isolated as a pale-yellow solid (PE/EA = 1:1, 59.6 mg, 82%). M.p.: 160-161 °C. <sup>1</sup>H NMR (600 MHz, DMSO)  $\delta$  13.92 (s, 1H), 9.59 (d,  $J$  = 2.3 Hz, 1H), 8.01 (dd,  $J$  = 15.5, 8.0 Hz, 3H), 7.94 (dd,  $J$  = 8.7, 2.3 Hz, 1H), 7.7 - 7.6 (m, 3H), 6.03 (s, 1H), 3.67 (s, 6H). <sup>13</sup>C NMR (100 MHz, DMSO)  $\delta$  181.2, 164.9, 148.4, 140.5, 134.0, 132.4, 129.7, 129.1, 128.8, 127.0, 116.9, 114.2, 79.6, 40.2. HRMS (ESI): Calcd for C<sub>17</sub>H<sub>16</sub>N<sub>2</sub>O<sub>5</sub>S [M+Na]<sup>+</sup> 383.0672, Found: 383.0670.

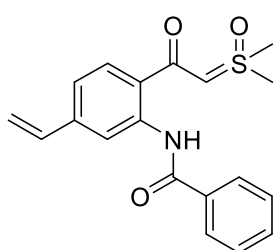

***N*-(2-(2-(dimethyl(oxo)- $\lambda^6$ -sulfanylidene)acetyl)-5-vinylphenyl)benzamide (3ka)**

The title compound was isolated as a pale-yellow solid (PE/EA = 1:1, 53.0 mg, 77%). M.p.: 150-151 °C. <sup>1</sup>H NMR (600 MHz, CDCl<sub>3</sub>)  $\delta$  13.24 (s, 1H), 8.94 (d,  $J$  = 1.5 Hz, 1H), 8.09 - 8.06 (m, 2H), 7.58 (d,  $J$  = 8.2 Hz, 1H), 7.54 - 7.48 (m, 3H), 7.11 (dd,  $J$  = 8.2, 1.6 Hz, 1H), 6.75 (dd,  $J$  = 17.6, 10.9 Hz, 1H), 5.90 (d,  $J$  = 17.6 Hz, 1H), 5.36 (d,  $J$  = 10.9 Hz, 1H), 5.30 (s, 1H), 5.05 (s, 1H), 3.54 (s, 6H). <sup>13</sup>C NMR (100 MHz, CDCl<sub>3</sub>)  $\delta$  185.4, 165.8, 141.3, 140.8, 136.5, 135.6, 131.6, 128.8, 127.7, 123.0, 120.2, 118.9, 116.2, 77.4, 71.7, 42.6. HRMS (ESI): Calcd for C<sub>19</sub>H<sub>19</sub>NO<sub>3</sub>S [M+Na]<sup>+</sup> 364.0978, Found: 364.0984.

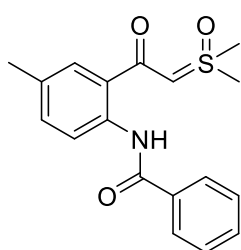

***N*-(2-(2-(dimethyl(oxo)- $\lambda^6$ -sulfanylidene)acetyl)-4-methylphenyl)benzamide (3la)**

The title compound was isolated as a pale-yellow solid (PE/EA = 1:1, 63.0 mg, 95%). M.p.: 135-136 °C. <sup>1</sup>H NMR (600 MHz, CDCl<sub>3</sub>)  $\delta$  12.99 (s, 1H), 8.70 (d,  $J$  = 8.5 Hz, 1H), 8.13 - 7.96 (m, 2H), 7.55 - 7.44 (m, 3H), 7.42 (d,  $J$  = 1.6 Hz, 1H), 7.28 - 7.25 (m, 1H), 5.06 (s, 1H), 3.52 (s, 6H), 2.33 (s, 3H). <sup>13</sup>C NMR (100 MHz, CDCl<sub>3</sub>)  $\delta$  185.9, 165.5, 137.8, 135.6, 132.7, 131.9, 131.5, 128.8, 128.7, 127.6, 124.0, 121.0, 71.9, 42.4, 21.0. HRMS (ESI): Calcd for C<sub>18</sub>H<sub>19</sub>NO<sub>3</sub>S [M+Na]<sup>+</sup> 352.0978, Found: 352.0982.



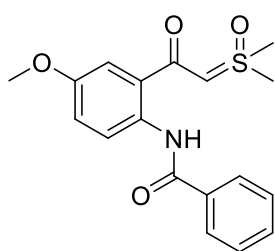

***N*-(2-(2-(dimethyl(oxo)- $\lambda^6$ -sulfanylidene)acetyl)-4-methoxyphenyl)benzamide (3ma)**

The title compound was isolated as a white solid (PE/EA = 1:1, 56.0 mg, 81%). M.p.: 169-170 °C. <sup>1</sup>H NMR (600 MHz, CDCl<sub>3</sub>)  $\delta$  12.74 (s, 1H), 8.73 (d, *J* = 8.7 Hz, 1H), 8.03 (d, *J* = 6.9 Hz, 2H), 7.52 - 7.44 (m, 3H), 7.12 (s, 1H), 7.01 (d, *J* = 8.9 Hz, 1H), 5.03 (s, 1H), 3.81 (s, 3H), 3.51 (s, 6H). <sup>13</sup>C NMR (100 MHz, CDCl<sub>3</sub>)  $\delta$  185.4, 165.2, 154.7, 135.6, 133.6, 131.5, 128.7, 127.5, 125.6, 122.5, 117.1, 113.8, 72.2, 55.8, 42.3. HRMS (ESI): Calcd for C<sub>18</sub>H<sub>19</sub>NO<sub>4</sub>S [M+Na]<sup>+</sup> 368.0927, Found: 368.0918.

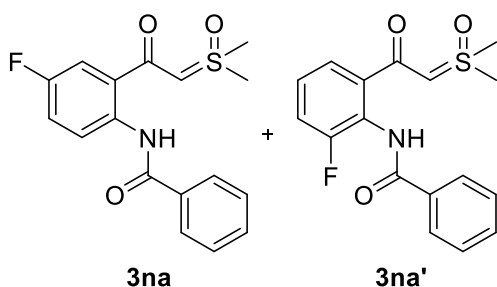

**3na**

**3na'**

**2.3:1**

***N*-(2-(2-(dimethyl(oxo)- $\lambda^6$ -sulfanylidene)acetyl)-4-fluorophenyl)benzamide (3na) and *N*-(2-(2-(dimethyl(oxo)- $\lambda^6$ -sulfanylidene)acetyl)-6-fluorophenyl)benzamide (3na')**

The title compound was isolated as a pale-yellow solid (PE/EA = 1:1, 42.7 mg, 64%). M.p.: 119-120 °C. <sup>1</sup>H NMR (600 MHz, DMSO)  $\delta$  11.09 (s, 1H), 7.96 (d, *J* = 7.7 Hz, 2H), 7.63 (t, *J* = 7.2 Hz, 1H), 7.56 (t, *J* = 7.5 Hz, 2H), 7.45 (d, *J* = 7.6 Hz, 1H), 7.35 (t, *J* = 9.1 Hz, 1H), 7.29 (m, 1H), 5.49 (s, 1H), 3.51 (s, 6H). <sup>13</sup>C NMR (150 MHz, DMSO)  $\delta$  181.9 (d, *J*<sub>C-F</sub> = 2.0 Hz), 173.4 (d, *J*<sub>C-F</sub> = 2.9 Hz), 164.9, 159.9, 158.8, 157.8, 157.1, 156.1, 141.1, 138.8 (d, *J*<sub>C-F</sub> = 10.4 Hz), 135.8, 134.3, 132.5, 129.3, 129.3, 128.7, 128.5, 128.0, 127.6, 126.6 (d, *J*<sub>C-F</sub> = 8.1 Hz), 125.3 (d, *J*<sub>C-F</sub> = 13.6 Hz), 124.3 (d, *J*<sub>C-F</sub> = 7.9 Hz), 124.0 (d, *J*<sub>C-F</sub> = 2.6 Hz), 120.0 (d, *J*<sub>C-F</sub> = 3.6 Hz), 117.8 (d, *J*<sub>C-F</sub> = 20.8 Hz), 117.2 (d, *J*<sub>C-F</sub> = 18.9 Hz), 102.9, 77.0, 41.8, 40.7. <sup>19</sup>F NMR (565 MHz, DMSO)  $\delta$  -115.50, -125.86. HRMS (ESI): Calcd for C<sub>17</sub>H<sub>16</sub>FNO<sub>3</sub>S [M+Na]<sup>+</sup> 356.0727, Found: 356.0735.

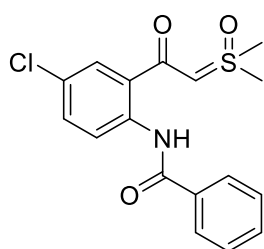

***N*-(4-chloro-2-(2-(dimethyl(oxo)- $\lambda^6$ -sulfanylidene)acetyl)phenyl)benzamide (3oa)**

The title compound was isolated as a pale-yellow solid (PE/EA = 1:1, 36.6 mg, 52%). M.p.: 156-157 °C. <sup>1</sup>H NMR (600 MHz, Acetone)  $\delta$  13.66 (s, 1H), 8.88 (d, *J* = 8.9 Hz, 1H), 8.08 - 8.06 (m, 2H), 7.75 (d, *J* = 2.5 Hz, 1H), 7.62 - 7.55 (m, 3H), 7.46 (dd, *J* = 8.9, 2.5 Hz, 1H), 5.76 (s, 1H), 3.70 (s, 6H). <sup>13</sup>C

NMR (100 MHz, Acetone)  $\delta$  184.1, 165.5, 140.3, 136.1, 132.6, 131.7, 129.6, 128.9, 128.2, 127.5, 126.7, 122.7, 77.0, 41.5. HRMS (ESI): Calcd for  $C_{17}H_{16}ClNO_3S$   $[M+Na]^+$  372.0432, Found: 372.0442.

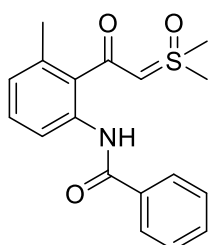

***N*-(2-(2-(dimethyl(oxo)- $\lambda^6$ -sulfanylidene)acetyl)-3-methylphenyl)benzamide (3pa)**

The title compound was isolated as a white solid (PE/EA = 1:1, 37.9 mg, 57%). M.p.: 170-171 °C.  $^1H$  NMR (600 MHz, DMSO)  $\delta$  10.38 (s, 1H), 8.01 (d,  $J$  = 8.1 Hz, 1H), 7.88 (d,  $J$  = 7.6 Hz, 2H), 7.61 (t,  $J$  = 7.2 Hz, 1H), 7.55 (t,  $J$  = 7.4 Hz, 2H), 7.24 (t,  $J$  = 7.8 Hz, 1H), 7.01 (d,  $J$  = 7.6 Hz, 1H), 5.21 (s, 1H), 3.58 (s, 6H), 2.41 (s, 3H).  $^{13}C$  NMR (100 MHz, DMSO)  $\delta$  182.7, 164.1, 135.1, 134.5, 134.3, 133.0, 131.8, 128.8, 128.1, 126.9, 126.1, 119.1, 80.1, 40.3, 20.4. HRMS (ESI): Calcd for  $C_{18}H_{19}NO_3S$   $[M+Na]^+$  352.0978, Found: 352.0974.

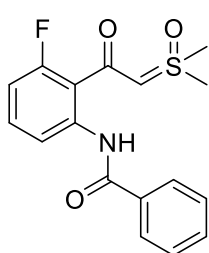

***N*-(2-(2-(dimethyl(oxo)- $\lambda^6$ -sulfanylidene)acetyl)-3-fluorophenyl)benzamide (3qa)**

The title compound was isolated as a white solid (PE/EA = 1:1, 63.5 mg, 95%). M.p.: 157-158 °C.  $^1H$  NMR (600 MHz, DMSO)  $\delta$  12.79 (s, 1H), 8.41 (d,  $J$  = 8.3 Hz, 1H), 7.94 (d,  $J$  = 7.5 Hz, 2H), 7.62 (m, 3H), 7.49 - 7.43 (m, 1H), 7.00 (dd,  $J$  = 10.8, 8.6 Hz, 1H), 5.52 (d,  $J$  = 1.9 Hz, 1H), 3.65 (s, 6H).  $^{13}C$  NMR (100 MHz, DMSO)  $\delta$  177.6 (d,  $J_{C-F}$  = 1.1 Hz), 164.2, 159.8 (d,  $J_{C-F}$  = 246.9 Hz), 140.2 (d,  $J_{C-F}$  = 5.2 Hz), 134.39, 132.06, 131.4 (d,  $J_{C-F}$  = 10.6 Hz), 129.0, 126.9, 116.2 (d,  $J_{C-F}$  = 2.8 Hz), 115.1 (d,  $J_{C-F}$  = 17.0 Hz), 110.6 (d,  $J_{C-F}$  = 24.6 Hz), 82.3 (d,  $J_{C-F}$  = 13.2 Hz), 40.4.  $^{19}F$  NMR (565 MHz, DMSO)  $\delta$  -108.69. HRMS (ESI): Calcd for  $C_{17}H_{16}FNO_3S$   $[M+Na]^+$  356.0727, Found: 356.0723.

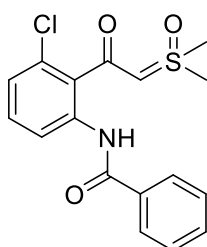

***N*-(3-chloro-2-(2-(dimethyl(oxo)- $\lambda^6$ -sulfanylidene)acetyl)phenyl)benzamide (3ra)**

The title compound was isolated as a white solid (PE/EA = 1:1, 66.1 mg, 93%). M.p.: 141-142 °C.  $^1H$  NMR (600 MHz, DMSO)  $\delta$  10.38 (s, 1H), 8.13 (d,  $J$  = 8.1 Hz, 1H), 7.92 - 7.86 (m, 2H), 7.63 (t,  $J$  = 7.3 Hz, 1H), 7.56 (t,  $J$  = 7.5 Hz, 2H), 7.38 (t,  $J$  = 8.1 Hz, 1H), 7.26 (d,  $J$  = 8.0 Hz, 1H), 5.29 (s, 1H), 3.59 (s, 6H).  $^{13}C$  NMR (150 MHz, DMSO)  $\delta$  179.6, 164.9, 137.4, 134.5, 132.6, 132.4, 130.2, 130.1,

129.4, 127.5, 125.9, 121.2, 81.1, 40.8. HRMS (ESI): Calcd for C<sub>17</sub>H<sub>16</sub>ClNO<sub>3</sub>S [M+Na]<sup>+</sup> 372.0432, Found: 372.0437.

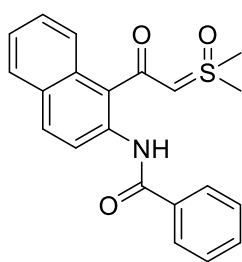

***N*-(1-(2-(dimethyl(oxo)-λ<sup>6</sup>-sulfanylidene)acetyl)naphthalen-2-yl)benzamide (3sa)**

The title compound was isolated as a gray solid (PE/EA = 1:1, 22.6 mg, 31%). M.p.: 130-131 °C. <sup>1</sup>H NMR (600 MHz, CDCl<sub>3</sub>) δ 10.83 (s, 1H), 8.61 (d, *J* = 9.0 Hz, 1H), 8.34 (d, *J* = 8.4 Hz, 1H), 8.06 - 7.98 (m, 2H), 7.87 (d, *J* = 9.0 Hz, 1H), 7.81 (d, *J* = 8.0 Hz, 1H), 7.55 - 7.52 (m, 1H), 7.52 - 7.44 (m, 3H), 7.41 (m, *J* = 7.9, 6.9, 1.1 Hz, 1H), 4.94 (s, 1H), 3.55 (s, 6H). <sup>13</sup>C NMR (100 MHz, CDCl<sub>3</sub>) δ 184.3, 165.3, 135.0, 134.5, 131.9, 130.8, 130.5, 130.2, 128.9, 128.4, 127.4, 126.6, 125.9, 125.6, 124.9, 121.1, 78.3, 42.4. HRMS (ESI): Calcd for C<sub>21</sub>H<sub>19</sub>NO<sub>3</sub>S [M+Na]<sup>+</sup> 388.0978, Found: 388.0980.

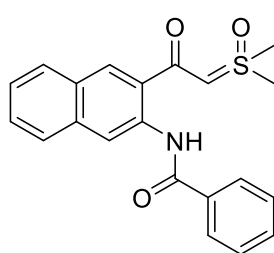

***N*-(3-(2-(dimethyl(oxo)-λ<sup>6</sup>-sulfanylidene)acetyl)naphthalen-2-yl)benzamide (3ta)**

The title compound was isolated as a pale-yellow solid (PE/EA = 1:1, 58.5 mg, 80%). M.p.: 145-146 °C. <sup>1</sup>H NMR (600 MHz, Acetone) δ 13.55 (s, 1H), 9.31 (s, 1H), 8.38 (s, 1H), 8.14 (d, *J* = 6.9 Hz, 2H), 7.88 (d, *J* = 7.7 Hz, 2H), 7.6 - 7.5 (m, 4H), 7.43 (t, *J* = 6.8 Hz, 1H), 5.79 (s, 1H), 3.73 (m, 6H). <sup>13</sup>C NMR (100 MHz, Acetone) δ 185.8, 165.4, 138.0, 136.5, 135.9, 132.4, 129.9, 129.6, 129.3, 128.7, 128.1, 126.3, 125.9, 117.5, 76.4, 41.7. HRMS (ESI): Calcd for C<sub>21</sub>H<sub>19</sub>NO<sub>3</sub>S [M+H]<sup>+</sup> 366.1158, Found: 366.1159.

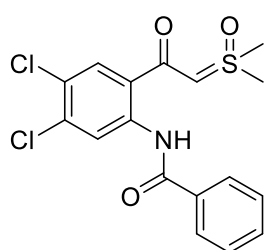

***N*-(4,5-dichloro-2-(2-(dimethyl(oxo)-λ<sup>6</sup>-sulfanylidene)acetyl)phenyl)benzamide (3ua)**

The title compound was isolated as a pale-yellow solid (PE/EA = 1:1, 56.6 mg, 73%). M.p.: 175-176 °C. <sup>1</sup>H NMR (600 MHz, DMSO) δ 13.94 (s, 1H), 8.99 (s, 1H), 8.03 (s, 1H), 7.98 - 7.96 (m, 2H), 7.66 (t, *J* = 7.2 Hz, 1H), 7.61 (t, *J* = 7.3 Hz, 2H), 6.09 (s, 1H), 3.63 (s, 6H). <sup>13</sup>C NMR (100 MHz, DMSO) δ 181.1, 164.7, 139.6, 134.1, 133.3, 132.3, 130.0, 129.0, 127.0, 124.2, 123.9, 121.0, 78.2, 40.3. HRMS (ESI): Calcd for C<sub>17</sub>H<sub>15</sub>Cl<sub>2</sub>NO<sub>3</sub>S [M+Na]<sup>+</sup> 406.0042, Found: 406.0041.

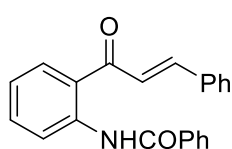

***N*-(2-cinnamoylphenyl)benzamide (3va)**

The title compound was isolated as a pale-yellow solid (PE/EA = 5:1, 23.6 mg, 36%). M.p.: 88-89 °C. <sup>1</sup>H NMR (600 MHz, CDCl<sub>3</sub>) δ 12.63 (s, 1H), 8.97 (d, *J* = 8.4 Hz, 1H), 8.11 (dd, *J* = 8.0, 1.4 Hz, 2H), 8.06 (dd, *J* = 8.0, 1.2 Hz, 1H), 7.87 (d, *J* = 15.5 Hz, 1H), 7.68 - 7.62 (m, 4H), 7.59 - 7.53 (m, 3H), 7.45 - 7.43 (m, 3H), 7.23 - 7.20 (m, 1H). <sup>13</sup>C NMR (150 MHz, CDCl<sub>3</sub>) δ 193.8, 166.2, 145.8, 141.7, 135.1, 135.0, 134.8, 132.1, 131.0, 130.9, 129.2, 129.0, 128.7, 127.6, 123.7, 122.9, 122.7, 121.4. HRMS (ESI): Calcd for C<sub>22</sub>H<sub>17</sub>NO<sub>2</sub> [M+Na]<sup>+</sup> 350.1151, Found: 350.1145.

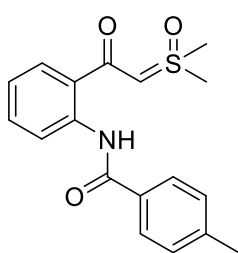

***N*-(2-(2-(dimethyl(oxo)-λ<sup>6</sup>-sulfanylidene)acetyl)phenyl)-4-methylbenzamide (3ab)**

The title compound was isolated as a pale-yellow solid (PE/EA = 1:1, 46.1 mg, 70%). M.p.: 136-137 °C. <sup>1</sup>H NMR (400 MHz, CDCl<sub>3</sub>) δ 13.04 (s, 1H), 8.81 (d, *J* = 8.3 Hz, 1H), 7.96 (d, *J* = 8.2 Hz, 2H), 7.61 (dd, *J* = 7.9, 1.3 Hz, 1H), 7.48 - 7.41 (m, 1H), 7.29 (d, *J* = 8.0 Hz, 2H), 7.08 - 6.99 (m, 1H), 5.05 (s, 1H), 3.52 (s, 6H), 2.42 (s, 3H). <sup>13</sup>C NMR (150 MHz, CDCl<sub>3</sub>) δ 185.8, 165.7, 142.0, 140.3, 132.7, 132.0, 129.4, 128.4, 127.6, 124.0, 122.4, 121.1, 72.1, 42.3, 21.6. HRMS (ESI): Calcd for C<sub>18</sub>H<sub>19</sub>NO<sub>3</sub>S [M+H]<sup>+</sup> 330.1158, Found: 330.1150.

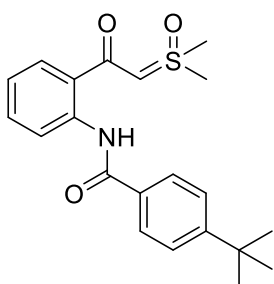

**4-(tert-butyl)-*N*-(2-(2-(dimethyl(oxo)-λ<sup>6</sup>-sulfanylidene)acetyl)phenyl)benzamide (3ac)**

The title compound was isolated as a pale-yellow liquid (PE/EA = 1:1, 62.6 mg, 84%). <sup>1</sup>H NMR (600 MHz, CDCl<sub>3</sub>) δ 13.12 (s, 1H), 8.82 (d, *J* = 8.4 Hz, 1H), 7.99 (d, *J* = 8.4 Hz, 2H), 7.58 (d, *J* = 7.8 Hz, 1H), 7.50 (d, *J* = 8.4 Hz, 2H), 7.42 (t, *J* = 7.5 Hz, 1H), 7.00 (t, *J* = 7.5 Hz, 1H), 5.09 (s, 1H), 3.49 (s, 7H), 1.34 (s, 9H). <sup>13</sup>C NMR (150 MHz, CDCl<sub>3</sub>) δ 185.7, 165.6, 155.0, 140.3, 132.6, 131.9, 128.4, 127.3, 125.6, 123.9, 122.4, 120.9, 72.4, 42.1, 35.0, 31.2. HRMS (ESI): Calcd for C<sub>21</sub>H<sub>25</sub>NO<sub>3</sub>S [M+Na]<sup>+</sup> 394.1447, Found: 394.1145.

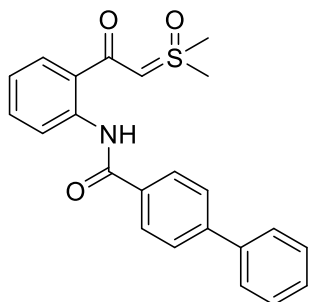

***N*-(2-(2-(dimethyl(oxo)- $\lambda^6$ -sulfanylidene)acetyl)phenyl)-[1,1'-biphenyl]-4-carboxamide (3ad)**

The title compound was isolated as a pale-yellow solid (PE/EA = 1:1, 51.9 mg, 66%). M.p.: 182-183 °C.  $^1\text{H}$  NMR (400 MHz,  $\text{CDCl}_3$ )  $\delta$  13.21 (s, 1H), 8.84 (d,  $J = 8.4$  Hz, 1H), 8.14 (d,  $J = 8.2$  Hz, 2H), 7.72 (d,  $J = 8.2$  Hz, 2H), 7.63 (t,  $J = 7.7$  Hz, 3H), 7.47 (t,  $J = 7.3$  Hz, 3H), 7.38 (t,  $J = 7.3$  Hz, 1H), 7.05 (t,  $J = 7.6$  Hz, 1H), 5.08 (s, 1H), 3.53 (s, 6H).  $^{13}\text{C}$  NMR (150 MHz,  $\text{CDCl}_3$ )  $\delta$  185.8, 165.4, 144.3, 140.3, 140.3, 134.3, 132.1, 129.0, 128.5, 128.1, 128.0, 127.4, 127.3, 123.9, 122.6, 121.1, 72.2, 42.4. HRMS (ESI): Calcd for  $\text{C}_{23}\text{H}_{21}\text{NO}_3\text{S}$   $[\text{M}+\text{Na}]^+$  414.1134, Found: 414.1127.

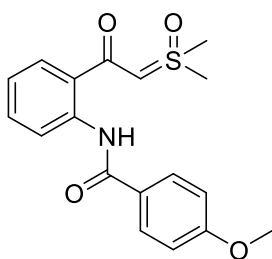

***N*-(2-(2-(dimethyl(oxo)- $\lambda^6$ -sulfanylidene)acetyl)phenyl)-4-methoxybenzamide (3ae)**

The title compound was isolated as a pale-yellow solid (PE/EA = 1:1, 32.5 mg, 47%). M.p.: 146-147 °C.  $^1\text{H}$  NMR (400 MHz,  $\text{CDCl}_3$ )  $\delta$  13.02 (s, 1H), 8.80 (d,  $J = 8.3$  Hz, 1H), 8.03 (d,  $J = 8.6$  Hz, 2H), 7.60 (d,  $J = 7.6$  Hz, 1H), 7.43 (t,  $J = 7.6$  Hz, 1H), 7.00 (m, 3H), 5.08 (s, 1H), 3.86 (s, 3H), 3.52 (s, 6H).  $^{13}\text{C}$  NMR (100 MHz,  $\text{CDCl}_3$ )  $\delta$  185.9, 165.3, 162.4, 140.5, 132.1, 129.5, 128.5, 127.9, 123.9, 122.3, 121.0, 113.9, 72.0, 55.5, 42.4. HRMS (ESI): Calcd for  $\text{C}_{18}\text{H}_{19}\text{NO}_4\text{S}$   $[\text{M}+\text{Na}]^+$  368.0927, Found: 368.0918.

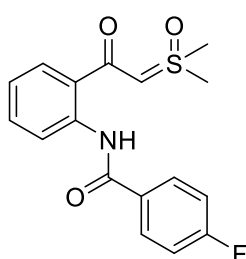

***N*-(2-(2-(dimethyl(oxo)- $\lambda^6$ -sulfanylidene)acetyl)phenyl)-4-fluorobenzamide (3af)**

The title compound was isolated as a white solid (PE/EA = 1:1, 54.0 mg, 81%). M.p.: 158-159 °C.  $^1\text{H}$  NMR (400 MHz,  $\text{CDCl}_3$ )  $\delta$  13.20 (s, 1H), 8.79 (d,  $J = 8.2$  Hz, 1H), 8.11 - 8.03 (m, 2H), 7.62 (dd,  $J = 7.9, 1.1$  Hz, 1H), 7.49 - 7.41 (m, 1H), 7.16 (t,  $J = 8.6$  Hz, 2H), 7.05 (t,  $J = 7.2$  Hz, 1H), 5.09 (s, 1H), 3.54 (s, 6H).  $^{13}\text{C}$  NMR (150 MHz,  $\text{CDCl}_3$ )  $\delta$  185.8, 164.9 (d,  $J = 250$  Hz), 164.6, 140.3, 132.2, 131.8 (d,  $J = 2.9$  Hz), 130.0 (d,  $J = 8.9$  Hz), 128.5, 123.8, 122.6, 121.0, 115.7 (d,  $J = 21.8$  Hz), 72.1, 42.4.  $^{19}\text{F}$  NMR (565 MHz,  $\text{CDCl}_3$ )  $\delta$  -108.52. HRMS (ESI): Calcd for  $\text{C}_{17}\text{H}_{16}\text{FNO}_3\text{S}$   $[\text{M}+\text{H}]^+$  334.0908, Found: 414.0910.

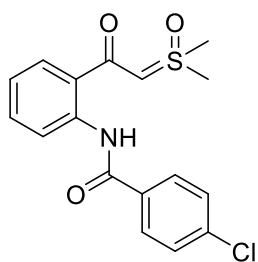

**4-chloro-*N*-(2-(2-(dimethyl(oxo)-λ<sup>6</sup>-sulfanylidene)acetyl)phenyl)benzamide (3ag)**

The title compound was isolated as a white solid (PE/EA = 1:1, 52.5 mg, 75%). M.p.: 181-182 °C. <sup>1</sup>H NMR (400 MHz, DMSO) δ 13.86 (s, 1H), 8.67 (d, *J* = 8.3 Hz, 1H), 7.98 (d, *J* = 8.3 Hz, 2H), 7.77 (d, *J* = 7.7 Hz, 1H), 7.68 (d, *J* = 8.3 Hz, 2H), 7.47 (t, *J* = 7.6 Hz, 1H), 7.12 (t, *J* = 7.4 Hz, 1H), 5.85 (s, 1H), 3.62 (s, 6H). <sup>13</sup>C NMR (150 MHz, DMSO) δ 184.3, 163.7, 140.2, 137.2, 134.1, 131.9, 129.6, 129.4, 129.1, 124.2, 123.2, 120.3, 77.7, 40.8. HRMS (ESI): Calcd for C<sub>17</sub>H<sub>16</sub>ClNO<sub>3</sub>S [M+Na]<sup>+</sup> 372.0432, Found: 372.0425.

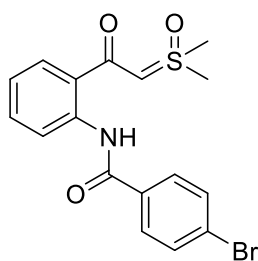

**4-bromo-*N*-(2-(2-(dimethyl(oxo)-λ<sup>6</sup>-sulfanylidene)acetyl)phenyl)benzamide (3ah)**

The title compound was isolated as a pale-yellow solid (PE/EA = 1:1, 61.3 mg, 78%). M.p.: 160-161 °C. <sup>1</sup>H NMR (400 MHz, DMSO) δ 13.87 (s, 1H), 8.68 (d, *J* = 8.2 Hz, 1H), 7.93 - 7.76 (m, 5H), 7.48 (t, *J* = 7.6 Hz, 1H), 7.12 (t, *J* = 7.3 Hz, 1H), 5.86 (s, 1H), 3.64 (s, 6H). <sup>13</sup>C NMR (150 MHz, DMSO) δ 184.3, 163.9, 140.2, 134.5, 132.5, 131.9, 129.5, 129.0, 126.2, 124.2, 123.1, 120.4, 77.6, 40.9. HRMS (ESI): Calcd for C<sub>17</sub>H<sub>16</sub>BrNO<sub>3</sub>S [M+Na]<sup>+</sup> 415.9926, Found: 415.9919.

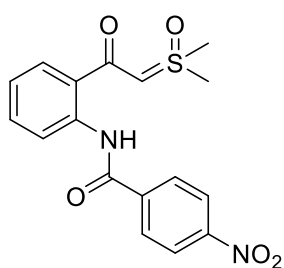

***N*-(2-(2-(dimethyl(oxo)-λ<sup>6</sup>-sulfanylidene)acetyl)phenyl)-4-nitrobenzamide (3ai)**

The title compound was isolated as a pale-yellow solid (PE/EA = 1:1, 46.7 mg, 64%). M.p.: 198-199 °C. <sup>1</sup>H NMR (400 MHz, DMSO) δ 14.15 (s, 1H), 8.68 (d, *J* = 8.2 Hz, 1H), 8.45 (d, *J* = 8.8 Hz, 2H), 8.19 (d, *J* = 8.8 Hz, 2H), 7.80 (d, *J* = 7.9 Hz, 1H), 7.50 (t, *J* = 7.8 Hz, 1H), 7.15 (t, *J* = 7.5 Hz, 1H), 5.89 (s, 1H), 3.64 (s, 6H). <sup>13</sup>C NMR (150 MHz, DMSO) δ 184.1, 163.0, 149.8, 140.9, 140.0, 132.0, 129.1, 129.0, 124.7, 124.3, 123.5, 120.4, 77.8, 40.9. HRMS (ESI): Calcd for C<sub>17</sub>H<sub>16</sub>N<sub>2</sub>O<sub>5</sub>S [M+Na]<sup>+</sup> 383.0672, Found: 383.0662.

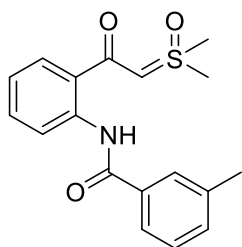

***N*-(2-(2-(dimethyl(oxo)-λ<sup>6</sup>-sulfanylidene)acetyl)phenyl)-3-methylbenzamide (3aj)**

The title compound was isolated as a pale-yellow solid (PE/EA = 1:1, 32.3 mg, 49%). M.p.: 148-149 °C. <sup>1</sup>H NMR (400 MHz, CDCl<sub>3</sub>) δ 13.05 (s, 1H), 8.80 (d, *J* = 8.4 Hz, 1H), 7.88 (s, 1H), 7.83 (d, *J* = 7.4 Hz, 1H), 7.60 (d, *J* = 7.8 Hz, 1H), 7.44 (t, *J* = 7.8 Hz, 1H), 7.40 - 7.31 (m, 2H), 7.03 (t, *J* = 7.5 Hz, 1H), 5.06 (s, 1H), 3.50 (s, 6H), 2.43 (s, 3H). <sup>13</sup>C NMR (150 MHz, CDCl<sub>3</sub>) δ 185.8, 165.9, 140.2, 138.5, 135.5, 132.4, 132.0, 128.6, 128.4, 124.4, 124.1, 122.5, 121.1, 72.0, 42.4, 21.6. HRMS (ESI): Calcd for C<sub>18</sub>H<sub>19</sub>NO<sub>3</sub>S [M+Na]<sup>+</sup> 352.0978, Found: 352.0972.

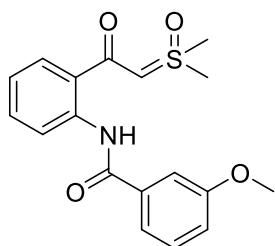

***N*-(2-(2-(dimethyl(oxo)-λ<sup>6</sup>-sulfanylidene)acetyl)phenyl)-3-methoxybenzamide (3ak)**

The title compound was isolated as a pale-yellow solid (PE/EA = 1:1, 19.1 mg, 28%). M.p.: 168-169 °C. <sup>1</sup>H NMR (400 MHz, CDCl<sub>3</sub>) δ 13.13 (s, 1H), 8.81 (d, *J* = 8.3 Hz, 1H), 7.62 (d, *J* = 8.0 Hz, 3H), 7.45 (t, *J* = 7.3 Hz, 1H), 7.39 (t, *J* = 8.0 Hz, 1H), 7.09 - 7.02 (m, 2H), 5.06 (s, 1H), 3.89 (s, 3H), 3.53 (s, 6H). <sup>13</sup>C NMR (100 MHz, CDCl<sub>3</sub>) δ 185.7, 165.5, 159.9, 140.2, 137.1, 132.1, 129.7, 128.5, 124.0, 122.6, 121.0, 119.5, 118.2, 112.6, 71.9, 55.5, 42.4. HRMS (ESI): Calcd for C<sub>18</sub>H<sub>19</sub>NO<sub>4</sub>S [M+Na]<sup>+</sup> 368.0927, Found: 368.0927.

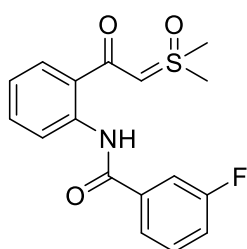

***N*-(2-(2-(dimethyl(oxo)-λ<sup>6</sup>-sulfanylidene)acetyl)phenyl)-3-fluorobenzamide (3al)**

The title compound was isolated as a white solid (PE/EA = 1:1, 39.6 mg, 59%). M.p.: 179-180 °C. <sup>1</sup>H NMR (400 MHz, DMSO) δ 13.90 (s, 1H), 8.67 (d, *J* = 8.3 Hz, 1H), 7.80 (dd, *J* = 16.2, 7.8 Hz, 2H), 7.73 - 7.64 (m, 2H), 7.56 - 7.43 (m, 2H), 7.13 (t, *J* = 7.6 Hz, 1H), 5.87 (s, 1H), 3.63 (s, 6H). <sup>13</sup>C NMR (150 MHz, DMSO) δ 184.3, 163.4 (d, *J*<sub>C-F</sub> = 2.4 Hz), 162.7 (d, *J*<sub>C-F</sub> = 243 Hz), 140.1, 137.9 (d, *J*<sub>C-F</sub> = 6.6 Hz), 131.9, 131.7 (d, *J*<sub>C-F</sub> = 8.0 Hz), 129.1, 124.2, 123.4 (d, *J*<sub>C-F</sub> = 2.6 Hz), 123.2, 120.3, 119.3 (d, *J*<sub>C-F</sub> = 21.2 Hz), 114.4 (d, *J*<sub>C-F</sub> = 22.9 Hz), 77.7, 40.9. <sup>19</sup>F NMR (565 MHz, DMSO) δ -111.85. HRMS (ESI): Calcd for C<sub>17</sub>H<sub>16</sub>FNO<sub>3</sub>S [M+Na]<sup>+</sup> 356.0727, Found: 356.0718.

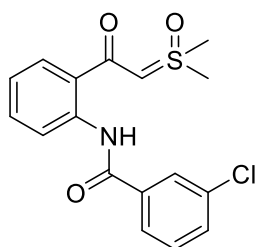

**3-chloro-*N*-(2-(2-(dimethyl(oxo)-λ<sup>6</sup>-sulfanylidene)acetyl)phenyl)benzamide (3am)**

The title compound was isolated as a pale-yellow solid (PE/EA = 1:1, 40.4 mg, 58%). M.p.: 150-151 °C. <sup>1</sup>H NMR (400 MHz, DMSO) δ 13.91 (s, 1H), 8.67 (d, *J* = 8.2 Hz, 1H), 7.99 - 7.88 (m, 2H), 7.78 (d, *J* = 7.4 Hz, 1H), 7.75 - 7.62 (m, 2H), 7.48 (t, *J* = 7.4 Hz, 1H), 7.13 (t, *J* = 7.5 Hz, 1H), 5.87 (s, 1H), 3.64 (s, 6H). <sup>13</sup>C NMR (100 MHz, DMSO) δ 184.2, 163.3, 140.1, 137.4, 134.2, 132.2, 131.9, 131.4, 129.0, 127.6, 125.9, 124.3, 123.3, 120.4, 77.7, 40.9. HRMS (ESI): Calcd for C<sub>17</sub>H<sub>16</sub>ClNO<sub>3</sub>S [M+Na]<sup>+</sup> 372.0432, Found: 372.0437.

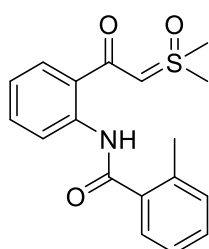

***N*-(2-(2-(dimethyl(oxo)-λ<sup>6</sup>-sulfanylidene)acetyl)phenyl)-2-methylbenzamide (3an)**

The title compound was isolated as a pale-yellow solid (PE/EA = 1:1, 40.7 mg, 62%). M.p.: 125-126 °C. <sup>1</sup>H NMR (400 MHz, CDCl<sub>3</sub>) δ 12.46 (s, 1H), 8.80 (d, *J* = 8.3 Hz, 1H), 7.59 (d, *J* = 7.6 Hz, 2H), 7.44 (t, *J* = 7.8 Hz, 1H), 7.33 (t, *J* = 7.4 Hz, 1H), 7.25 (t, *J* = 6.4 Hz, 2H), 7.04 (t, *J* = 7.6 Hz, 1H), 5.03 (s, 1H), 3.44 (s, 6H), 2.55 (s, 3H). <sup>13</sup>C NMR (150 MHz, CDCl<sub>3</sub>) δ 185.5, 168.5, 140.0, 137.2, 136.9, 132.0, 131.4, 130.1, 128.5, 127.4, 126.0, 124.2, 122.6, 120.9, 71.9, 42.3, 20.4. HRMS (ESI): Calcd for C<sub>18</sub>H<sub>19</sub>NO<sub>3</sub>S [M+Na]<sup>+</sup> 352.0978, Found: 352.0982.

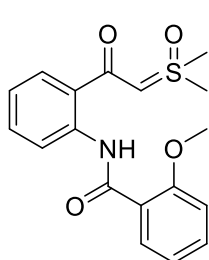

***N*-(2-(2-(dimethyl(oxo)-λ<sup>6</sup>-sulfanylidene)acetyl)phenyl)-2-methoxybenzamide (3ao)**

The title compound was isolated as a pale-yellow liquid (PE/EA = 1:1, 52.9 mg, 76%). <sup>1</sup>H NMR (600 MHz, CDCl<sub>3</sub>) δ 12.27 (s, 1H), 8.73 (d, *J* = 8.3 Hz, 1H), 8.13 (dd, *J* = 7.7, 1.5 Hz, 1H), 7.53 (d, *J* = 7.7 Hz, 1H), 7.46 - 7.43 (m, 1H), 7.41 (dd, *J* = 11.5, 4.2 Hz, 1H), 7.06 (t, *J* = 7.5 Hz, 1H), 7.03 (t, *J* = 7.5 Hz, 1H), 6.99 (d, *J* = 8.3 Hz, 1H), 4.97 (s, 1H), 4.07 (s, 3H), 3.48 (s, 6H). <sup>13</sup>C NMR (150 MHz, CDCl<sub>3</sub>) δ 186.0, 164.5, 157.7, 138.5, 132.8, 132.1, 131.3, 128.2, 127.5, 123.6, 122.7, 122.5, 121.0, 111.5, 71.9, 55.8, 42.2. HRMS (ESI): Calcd for C<sub>18</sub>H<sub>19</sub>NO<sub>4</sub>S [M+Na]<sup>+</sup> 368.0927, Found: 368.0926.



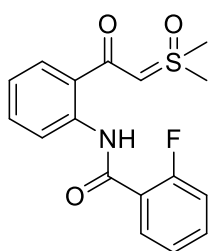

***N*-(2-(2-(dimethyl(oxo)- $\lambda^6$ -sulfanylidene)acetyl)phenyl)-2-fluorobenzamide (3ap)**

The title compound was isolated as a pale-yellow solid (PE/EA = 1:1, 37.8 mg, 57%). M.p.: 142-143 °C.  $^1\text{H}$  NMR (400 MHz,  $\text{CDCl}_3$ )  $\delta$  12.48 (s, 1H), 8.78 (d,  $J = 8.3$  Hz, 1H), 8.03 (t,  $J = 7.7$  Hz, 1H), 7.60 (d,  $J = 7.8$  Hz, 1H), 7.51 - 7.44 (m, 2H), 7.29 (d,  $J = 7.1$  Hz, 1H), 7.20 - 7.13 (m, 1H), 7.09 (t,  $J = 7.5$  Hz, 1H), 5.00 (s, 1H), 3.53 (s, 6H).  $^{13}\text{C}$  NMR (150 MHz,  $\text{CDCl}_3$ )  $\delta$  185.2, 162.4, 160.2 (d,  $J_{\text{C-F}} = 250.8$  Hz), 138.9, 133.0 (d,  $J_{\text{C-F}} = 8.7$  Hz), 131.6, 131.6, 128.2, 125.9, 124.6 (d,  $J_{\text{C-F}} = 2.8$  Hz), 123.8 (d,  $J_{\text{C-F}} = 12.3$  Hz), 123.1, 121.7, 116.4 (d,  $J_{\text{C-F}} = 23.2$  Hz), 71.8, 42.4.  $^{19}\text{F}$  NMR (565 MHz,  $\text{CDCl}_3$ )  $\delta$  -112.97. HRMS (ESI): Calcd for  $\text{C}_{17}\text{H}_{16}\text{FNO}_3\text{S}$   $[\text{M}+\text{Na}]^+$  356.0727, Found: 356.0732.

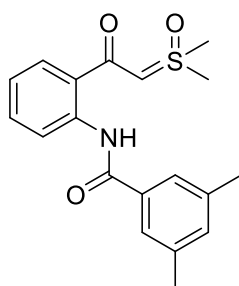

***N*-(2-(2-(dimethyl(oxo)- $\lambda^6$ -sulfanylidene)acetyl)phenyl)-3,5-dimethylbenzamide (3aq)**

The title compound was isolated as a pale-yellow solid (PE/EA = 1:1, 44.5 mg, 65%). M.p.: 176-177 °C.  $^1\text{H}$  NMR (400 MHz,  $\text{CDCl}_3$ )  $\delta$  12.95 (s, 1H), 8.77 (d,  $J = 7.9$  Hz, 1H), 7.64 (s, 2H), 7.59 (dd,  $J = 7.9, 1.2$  Hz, 1H), 7.46 - 7.40 (m, 1H), 7.15 (s, 1H), 7.07 - 6.98 (m, 1H), 5.07 (s, 1H), 3.51 (s, 6H), 2.39 (s, 6H).  $^{13}\text{C}$  NMR (150 MHz,  $\text{CDCl}_3$ )  $\delta$  185.8, 166.2, 140.1, 138.2, 135.6, 133.2, 131.9, 128.4, 125.4, 124.2, 122.5, 121.1, 72.2, 42.3, 21.5. HRMS (ESI): Calcd for  $\text{C}_{19}\text{H}_{21}\text{NO}_3\text{S}$   $[\text{M}+\text{Na}]^+$  366.1134, Found: 366.1132.

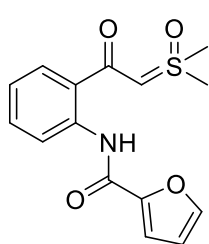

***N*-(2-(2-(dimethyl(oxo)- $\lambda^6$ -sulfanylidene)acetyl)phenyl)furan-2-carboxamide (3ar)**

The title compound was isolated as a pale-yellow solid (PE/EA = 1:1, 21.4 mg, 35%). M.p.: 105-106 °C.  $^1\text{H}$  NMR (400 MHz,  $\text{CD}_2\text{Cl}_2$ )  $\delta$  12.97 (s, 1H), 8.60 (d,  $J = 8.3$  Hz, 1H), 7.55 (d,  $J = 7.7$  Hz, 2H), 7.34 (t,  $J = 7.8$  Hz, 1H), 7.10 (d,  $J = 3.3$  Hz, 1H), 6.98 (t,  $J = 7.5$  Hz, 1H), 6.48 (dd,  $J = 3.2, 1.6$  Hz, 1H), 3.45 (s, 6H).  $^{13}\text{C}$  NMR (100 MHz,  $\text{CD}_2\text{Cl}_2$ )  $\delta$  185.8, 156.9, 149.3, 145.1, 139.9, 132.0, 128.7, 124.6, 122.8, 121.1, 114.7, 112.4, 73.1, 42.4. HRMS (ESI): Calcd for  $\text{C}_{15}\text{H}_{15}\text{NO}_4\text{S}$   $[\text{M}+\text{H}]^+$  306.0795, Found: 306.0795.

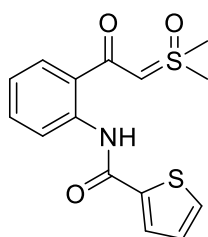

***N*-(2-(2-(dimethyl(oxo)-λ<sup>6</sup>-sulfanylidene)acetyl)phenyl)thiophene-2-carboxamide (3as)**

The title compound was isolated as a pale-yellow solid (PE/EA = 1:1, 36.2 mg, 56%). M.p.: 164-165 °C. <sup>1</sup>H NMR (400 MHz, DMSO) δ 13.88 (s, 1H), 8.58 (dd, *J* = 8.3, 0.9 Hz, 1H), 7.89 (dd, *J* = 5.0, 1.0 Hz, 1H), 7.83 - 7.73 (m, 2H), 7.50 - 7.40 (m, 1H), 7.28 (dd, *J* = 4.9, 3.8 Hz, 1H), 7.16 - 7.03 (m, 1H), 5.86 (s, 1H), 3.64 (s, 6H). <sup>13</sup>C NMR (100 MHz, DMSO) δ 184.3, 159.8, 141.0, 140.1, 132.4, 131.9, 129.0, 128.9, 128.7, 123.8, 122.9, 120.1, 77.5, 40.9. HRMS (ESI): Calcd for C<sub>15</sub>H<sub>15</sub>NO<sub>3</sub>S<sub>2</sub> [M+Na]<sup>+</sup> 344.0386, Found: 344.0382.

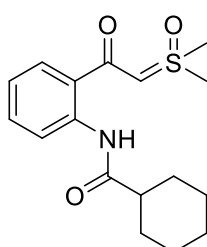

***N*-(2-(2-(dimethyl(oxo)-λ<sup>6</sup>-sulfanylidene)acetyl)phenyl)cyclohexanecarboxamide (3at)**

The title compound was isolated as a pale-yellow solid (PE/EA = 1:1, 34.6 mg, 54%). M.p.: 130-131 °C. <sup>1</sup>H NMR (400 MHz, CDCl<sub>3</sub>) δ 11.99 (s, 1H), 8.64 (d, *J* = 8.3 Hz, 1H), 7.55 (dd, *J* = 7.9, 1.2 Hz, 1H), 7.42 - 7.31 (m, 1H), 6.98 (t, *J* = 7.3 Hz, 1H), 5.03 (s, 1H), 3.52 (s, 6H), 2.35 - 2.23 (m, 1H), 1.98 (d, *J* = 13.2 Hz, 2H), 1.85 - 1.78 (m, 2H), 1.69 (d, *J* = 11.0 Hz, 1H), 1.6 - 1.5 (m, 2H), 1.35 - 1.25 (m, 3H). <sup>13</sup>C NMR (100 MHz, CDCl<sub>3</sub>) δ 185.9, 175.3, 140.1, 131.9, 128.3, 124.0, 122.2, 121.0, 71.9, 47.2, 42.4, 29.8, 26.0, 25.9. HRMS (ESI): Calcd for C<sub>17</sub>H<sub>23</sub>NO<sub>3</sub>S [M+Na]<sup>+</sup> 344.1291, Found: 344.1288.

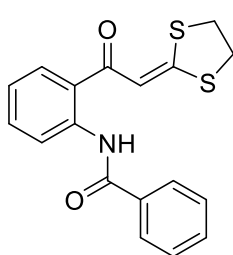

***N*-(2-(2-(1,3-dithiolan-2-ylidene)acetyl)phenyl)benzamide (5a)**

The title compound was isolated as a pale-yellow solid (PE/EA = 5:1, 60.8 mg, 89%). M.p.: 113-114 °C. <sup>1</sup>H NMR (600 MHz, CDCl<sub>3</sub>) δ 12.57 (s, 1H), 8.79 (d, *J* = 8.4 Hz, 1H), 8.01 (d, *J* = 7.4 Hz, 2H), 7.73 (d, *J* = 7.9 Hz, 1H), 7.54 - 7.35 (m, 4H), 7.03 (t, *J* = 7.6 Hz, 1H), 3.38 (t, *J* = 6.3 Hz, 2H), 3.28 (t, *J* = 6.3 Hz, 2H). <sup>13</sup>C NMR (150 MHz, CDCl<sub>3</sub>) δ 189.2, 170.4, 166.0, 141.1, 135.2, 133.8, 131.9, 129.4, 128.8, 127.7, 124.1, 122.7, 121.3, 109.6, 39.1, 35.6. HRMS (ESI): Calcd for C<sub>18</sub>H<sub>15</sub>NO<sub>2</sub>S<sub>2</sub> [M+Na]<sup>+</sup> 364.0436, Found: 364.0426.

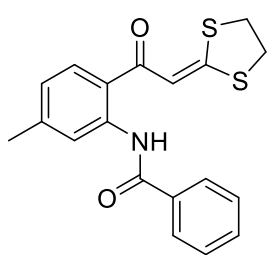

***N*-(2-(2-(1,3-dithiolan-2-ylidene)acetyl)-5-methylphenyl)benzamide  
(5b)**

The title compound was isolated as a pale-yellow solid (PE/EA = 5:1, 56.0 mg, 78%). M.p.: 149-150 °C. <sup>1</sup>H NMR (600 MHz, CDCl<sub>3</sub>) δ 12.78 (s, 1H), 8.75 (s, 1H), 8.16 - 8.05 (m, 2H), 7.74 (d, *J* = 8.1 Hz, 1H), 7.60 - 7.46 (m, 3H), 7.37 (s, 1H), 6.94 (dd, *J* = 8.1, 1.0 Hz, 1H), 3.50 (dd, *J* = 7.4, 5.5 Hz, 2H), 3.40 (dd, *J* = 7.3, 5.5 Hz, 2H), 2.43 (s, 3H). <sup>13</sup>C NMR (150 MHz, CDCl<sub>3</sub>) δ 189.0, 169.4, 166.1, 145.1, 141.4, 135.3, 131.8, 129.5, 128.8, 127.7, 123.6, 121.6, 121.5, 109.6, 39.1, 35.6, 22.3. HRMS (ESI): Calcd for C<sub>19</sub>H<sub>17</sub>NO<sub>2</sub>S<sub>2</sub> [M+Na]<sup>+</sup> 378.0593, Found: 378.0598.

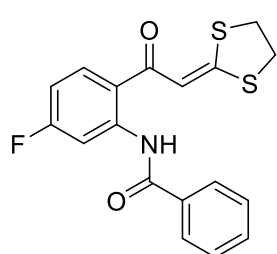

***N*-(2-(2-(1,3-dithiolan-2-ylidene)acetyl)-5-fluorophenyl)benzamide  
(5c)**

The title compound was isolated as a pale-yellow solid (PE/EA = 5:1, 66.8 mg, 92%). M.p.: 139-140 °C. <sup>1</sup>H NMR (600 MHz, CDCl<sub>3</sub>) δ 12.97 (s, 1H), 8.74 (dd, *J* = 12.0, 2.6 Hz, 1H), 8.09 (dd, *J* = 5.2, 3.3 Hz, 2H), 7.85 (dd, *J* = 8.9, 6.3 Hz, 1H), 7.58 - 7.49 (m, 3H), 7.30 (s, 1H), 6.81 (ddd, *J* = 8.9, 7.5, 2.6 Hz, 1H), 3.49 (dd, *J* = 7.3, 5.5 Hz, 2H), 3.40 (dd, *J* = 7.3, 5.5 Hz, 2H). <sup>13</sup>C NMR (150 MHz, CDCl<sub>3</sub>) δ 188.1, 170.7, 166.2, 165.6 (d, *J*<sub>C-F</sub> = 252.8 Hz), 143.7 (d, *J*<sub>C-F</sub> = 12.9 Hz), 134.8, 132.1, 131.6 (d, *J*<sub>C-F</sub> = 10.7 Hz), 128.9, 127.7, 120.2 (d, *J*<sub>C-F</sub> = 2.7 Hz), 109.8 (d, *J*<sub>C-F</sub> = 22.3 Hz), 109.2, 108.3 (d, *J*<sub>C-F</sub> = 27.9 Hz). 39.2, 35.6. <sup>19</sup>F NMR (565 MHz, CDCl<sub>3</sub>) δ -102.03. HRMS (ESI): Calcd for C<sub>18</sub>H<sub>14</sub>FNO<sub>2</sub>S<sub>2</sub> [M+Na]<sup>+</sup> 382.0342, Found: 382.0332.

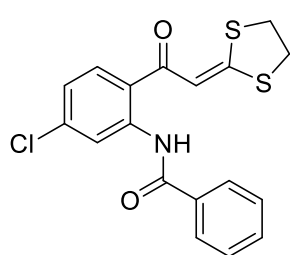

***N*-(2-(2-(1,3-dithiolan-2-ylidene)acetyl)-5-chlorophenyl)benzamide  
(5d)**

The title compound was isolated as a pale-yellow solid (PE/EA = 5:1, 73.4 mg, 97%). M.p.: 157-158 °C. <sup>1</sup>H NMR (600 MHz, CDCl<sub>3</sub>) δ 12.81 (s, 1H), 9.01 (s, 1H), 8.09 (d, *J* = 7.4 Hz, 2H), 7.76 (d, *J* = 8.5 Hz, 1H), 7.58 - 7.51 (m, 3H), 7.30 (s, 1H), 7.09 (d, *J* = 8.5 Hz, 1H), 3.50 (t, *J* = 6.3 Hz, 2H), 3.41 (t, *J* = 6.3 Hz, 2H). <sup>13</sup>C NMR (150 MHz, CDCl<sub>3</sub>) δ 188.2, 171.3, 166.0, 142.2, 139.9, 134.8, 132.1, 130.4, 128.9, 127.7, 122.8, 122.1, 121.1, 109.2, 39.2, 35.7. HRMS (ESI): Calcd for C<sub>18</sub>H<sub>14</sub>ClNO<sub>2</sub>S<sub>2</sub> [M+Na]<sup>+</sup> 398.0047, Found: 398.0046.

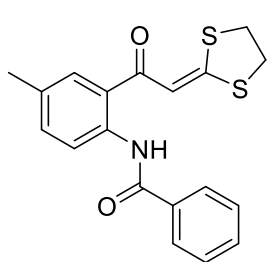

***N*-(2-(2-(1,3-dithiolan-2-ylidene)acetyl)-4-methylphenyl)benzamide (5e)**

The title compound was isolated as a pale-yellow solid (PE/EA = 5:1, 46.9 mg, 66%). M.p.: 136-137 °C. <sup>1</sup>H NMR (600 MHz, CDCl<sub>3</sub>) δ 12.53 (s, 1H), 8.76 (d, *J* = 8.5 Hz, 1H), 8.09 (dd, *J* = 7.8, 1.4 Hz, 2H), 7.62 (s, 1H), 7.60 - 7.44 (m, 3H), 7.39 - 7.31 (m, 2H), 3.49 (t, *J* = 6.4 Hz, 2H), 3.39 (t, *J* = 6.4 Hz, 2H), 2.38 (s, 3H). <sup>13</sup>C NMR (150 MHz, CDCl<sub>3</sub>) δ 189.3, 170.0, 165.8, 138.7, 135.3, 134.5, 132.2, 131.7, 129.7, 128.8, 127.6, 124.1, 121.3, 109.7, 39.1, 35.6, 21.0. HRMS (ESI): Calcd for C<sub>19</sub>H<sub>17</sub>NO<sub>2</sub>S<sub>2</sub> [M+H]<sup>+</sup> 356.0773, Found: 356.0766.

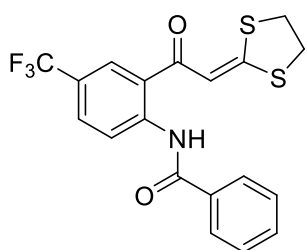

**5f**

+

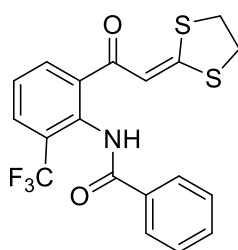

**5f'**

**3:1**

***N*-(2-(2-(1,3-dithiolan-2-ylidene)acetyl)-4-(trifluoromethyl)phenyl)benzamide (5f)**

**and**

***N*-(2-(2-(1,3-dithiolan-2-ylidene)acetyl)-6-(trifluoromethyl)phenyl)benzamide (5f')**

The title compound was isolated as a pale-yellow solid (PE/EA = 5:1, 63.8 mg, 78%). M.p.: 78-79 °C. <sup>1</sup>H NMR (600 MHz, CDCl<sub>3</sub>) δ 12.80 (s, 1H), 9.04 (d, *J* = 8.8 Hz, 1H), 8.20 (s, 0.31H), 8.13 - 8.07 (m, 2.32H), 8.05 (s, 1H), 7.78 - 7.75 (m, 1.30H), 7.59 - 7.51 (m, 3.32H), 7.34 (s, 1H), 7.33 (s, 0.31H), 3.54 - 3.48 (m, 2.64H), 3.44 - 3.40 (m, 2.67H). <sup>13</sup>C NMR (150 MHz, CDCl<sub>3</sub>) δ 187.9, 184.4, 172.8, 170.5, 166.2, 143.9, 139.0, 134.6, 132.3, 131.06, 130.17 (q, *J*<sub>C-F</sub> = 3.3 Hz), 129.24, 128.94, 128.53, 128.51, 128.48, 128.46, 127.7, 126.7, 126.3 (q, *J*<sub>C-F</sub> = 3.8 Hz), 124.9, 124.8 (q, *J*<sub>C-F</sub> = 3.8 Hz), 124.7, 124.5, 124.3, 124.0, 123.7, 123.1, 121.4, 108.9, 107.7, 39.3, 39.1, 35.8, 35.7. <sup>19</sup>F NMR (565 MHz, CDCl<sub>3</sub>) δ -62.06, -62.67. HRMS (ESI): Calcd for C<sub>19</sub>H<sub>14</sub>F<sub>3</sub>NO<sub>2</sub>S<sub>2</sub> [M+H]<sup>+</sup> 432.0310, Found: 432.0307.

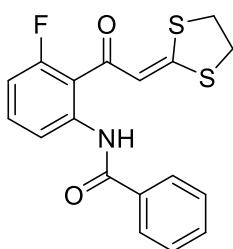

***N*-(2-(2-(1,3-dithiolan-2-ylidene)acetyl)-3-fluorophenyl)benzamide (5g)**

The title compound was isolated as a pale-yellow solid (PE/EA = 5:1, 64.9 mg, 90%). M.p.: 87-88 °C. <sup>1</sup>H NMR (600 MHz, CDCl<sub>3</sub>) δ 11.80 (s, 1H), 8.55 (d, *J* = 8.4 Hz, 1H), 8.04 (dd, *J* = 5.2, 3.2 Hz, 2H), 7.59 - 7.49 (m, 3H), 7.46 (td, *J* = 8.3, 6.4 Hz, 1H), 7.22 (d, *J* = 4.4 Hz, 1H), 6.87 (dd, *J* = 10.4, 8.4

Hz, 1H), 3.50 (t,  $J = 6.5$  Hz, 2H), 3.40 (t,  $J = 6.4$  Hz, 2H).  $^{13}\text{C}$  NMR (150 MHz,  $\text{CDCl}_3$ )  $\delta$  185.9 (d,  $J_{\text{C-F}} = 2.1$  Hz), 171.1 (d,  $J_{\text{C-F}} = 1.5$  Hz), 165.7, 161.4 (d,  $J_{\text{C-F}} = 248.9$  Hz), 140.9 (d,  $J_{\text{C-F}} = 4.7$  Hz), 134.8, 133.5 (d,  $J_{\text{C-F}} = 11.0$  Hz), 132.1, 128.9, 127.6, 117.3 (d,  $J_{\text{C-F}} = 3.0$  Hz), 115.5 (d,  $J_{\text{C-F}} = 15.6$  Hz), 114.1 (d,  $J_{\text{C-F}} = 12.0$  Hz), 110.8 (d,  $J_{\text{C-F}} = 24.0$  Hz), 39.3, 35.8.  $^{19}\text{F}$  NMR (376 MHz,  $\text{CDCl}_3$ )  $\delta$  -107.52. HRMS (ESI): Calcd for  $\text{C}_{18}\text{H}_{14}\text{FNO}_2\text{S}_2$   $[\text{M}+\text{Na}]^+$  382.0342, Found: 382.0339.

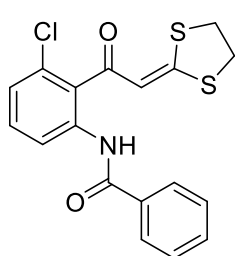

***N*-(2-(2-(1,3-dithiolan-2-ylidene)acetyl)-3-chlorophenyl)benzamide**

**(5h)**

The title compound was isolated as a pale-yellow solid (PE/EA = 5:1, 53.8 mg, 71%). M.p.: 131-132 °C.  $^1\text{H}$  NMR (600 MHz,  $\text{CDCl}_3$ )  $\delta$  10.14 (s, 1H), 8.45 (dd,  $J = 8.3, 0.8$  Hz, 1H), 7.93 (dd,  $J = 5.2, 3.4$  Hz, 2H),

7.56 - 7.53 (m, 1H), 7.51 - 7.48 (m, 2H), 7.37 (t,  $J = 8.2$  Hz, 1H), 7.18 (dd,  $J = 8.0, 0.9$  Hz, 1H), 7.08 (s, 1H), 3.53 (dd,  $J = 7.4, 5.6$  Hz, 2H), 3.41 (dd,  $J = 7.4, 5.6$  Hz, 2H).  $^{13}\text{C}$  NMR (150 MHz,  $\text{CDCl}_3$ )  $\delta$  188.0, 171.0, 165.2, 138.4, 134.4, 132.1, 131.5, 131.5, 128.9, 128.8, 127.5, 125.6, 120.6, 114.3, 39.3, 35.9. HRMS (ESI): Calcd for  $\text{C}_{18}\text{H}_{14}\text{ClNO}_2\text{S}_2$   $[\text{M}+\text{Na}]^+$  398.0047, Found: 398.0041.

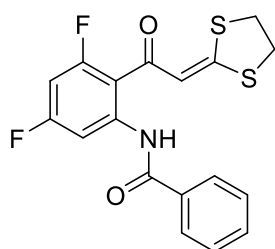

***N*-(2-(2-(1,3-dithiolan-2-ylidene)acetyl)-3,5-difluorophenyl)benzamide (5i)**

The title compound was isolated as a pale-yellow solid (PE/EA = 5:1, 61.4 mg, 81%). M.p.: 100-101 °C.  $^1\text{H}$  NMR (600 MHz,  $\text{CDCl}_3$ )  $\delta$  12.22 (s, 1H), 8.62 - 8.34 (m, 1H), 8.04 (dd,  $J = 5.2, 3.4$  Hz, 2H), 7.58

- 7.51 (m, 3H), 7.20 (d,  $J = 4.3$  Hz, 1H), 6.60 (ddd,  $J = 11.1, 8.3, 2.5$  Hz, 1H), 3.51 (dd,  $J = 7.4, 5.5$  Hz, 2H), 3.42 (dd,  $J = 7.4, 5.5$  Hz, 2H).  $^{13}\text{C}$  NMR (150 MHz,  $\text{CDCl}_3$ )  $\delta$  185.1 (d,  $J_{\text{C-F}} = 3.0$  Hz), 171.7 (d,  $J_{\text{C-F}} = 1.7$  Hz), 165.8, 165.7, 164.1 (d,  $J_{\text{C-F}} = 15.9$  Hz), 163.2 (d,  $J_{\text{C-F}} = 14.9$  Hz), 161.6 (d,  $J_{\text{C-F}} = 15.2$  Hz), 142.9 (d,  $J_{\text{C-F}} = 7.2$  Hz), 142.8 (d,  $J_{\text{C-F}} = 6.9$  Hz), 134.4, 132.3, 129.0, 127.7, 113.6 (d,  $J_{\text{C-F}} = 13.2$  Hz), 111.5 (d,  $J_{\text{C-F}} = 3.9$  Hz), 111.4 (d,  $J_{\text{C-F}} = 3.8$  Hz), 104.8 (d,  $J_{\text{C-F}} = 3.3$  Hz), 104.6 (d,  $J_{\text{C-F}} = 3.2$  Hz), 99.4 (d,  $J_{\text{C-F}} = 26.0$  Hz), 99.2 (d,  $J_{\text{C-F}} = 26.0$  Hz), 39.3, 35.8.  $^{19}\text{F}$  NMR (565 MHz,  $\text{CDCl}_3$ )  $\delta$  -101.09, -101.12, -103.12, -103.15. HRMS (ESI): Calcd for  $\text{C}_{18}\text{H}_{13}\text{F}_2\text{NO}_2\text{S}_2$   $[\text{M}+\text{Na}]^+$  400.0248, Found: 400.0242.

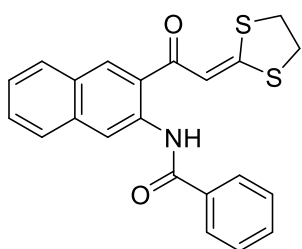

***N*-(3-(2-(1,3-dithiolan-2-ylidene)acetyl)naphthalen-2-yl)benzamide (5j)**

The title compound was isolated as a pale-yellow solid (PE/EA = 5:1, 62.8 mg, 80%). M.p.: 186-187 °C. <sup>1</sup>H NMR (600 MHz, CDCl<sub>3</sub>) δ 12.46 (s, 1H), 9.31 (s, 1H), 8.37 (s, 1H), 8.20 - 8.11 (m, 2H), 7.92 - 7.81 (m, 2H), 7.59 - 7.52 (m, 5H), 7.47 - 7.39 (m, 1H), 3.53 (t, *J* = 6.3 Hz, 2H), 3.43 (t, *J* = 6.3 Hz, 2H). <sup>13</sup>C NMR (150 MHz, CDCl<sub>3</sub>) δ 189.4, 170.8, 165.9, 136.4, 136.1, 135.3, 131.8, 131.2, 129.1, 128.9, 128.8, 128.7, 127.9, 127.6, 125.6, 125.2, 118.3, 109.8, 39.2, 35.7. HRMS (ESI): Calcd for C<sub>22</sub>H<sub>17</sub>NO<sub>2</sub>S<sub>2</sub> [M+H]<sup>+</sup> 392.0773, Found: 392.0780.

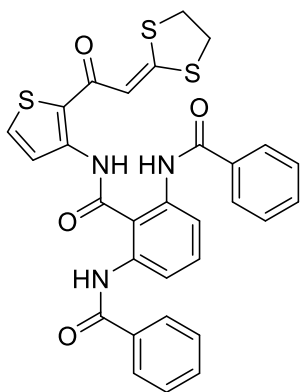

***N,N'*-(2-((2-(2-(1,3-dithiolan-2-ylidene)acetyl)thiophen-3-yl)carbonyl)-1,3-phenylene)dibenzamide (5k)**

The title compound was isolated as a pale-yellow solid (PE/EA = 5:1, 32.8 mg, 28%). M.p.: 93-94 °C. <sup>1</sup>H NMR (600 MHz, CDCl<sub>3</sub>) δ 12.50 (s, 1H), 11.98 (s, 1H), 11.76 (s, 1H), 8.16 (t, *J* = 7.7 Hz, 4H), 8.07 (d, *J* = 7.4 Hz, 2H), 7.66 - 7.48 (m, 9H), 7.09 (s, 1H), 3.51 (t, *J* = 6.0 Hz, 2H), 3.41 (t, *J* = 5.8 Hz, 2H). <sup>13</sup>C NMR (150 MHz, CDCl<sub>3</sub>) δ 181.1, 167.9, 167.5, 166.1, 164.7, 136.4, 134.3, 133.3, 133.1, 132.9, 132.9, 132.8, 132.8, 132.6, 132.5, 132.5, 129.1, 129.1, 128.9, 128.4, 128.2, 127.8, 117.8, 114.9, 109.5, 39.4, 35.8. HRMS (ESI): Calcd for C<sub>30</sub>H<sub>23</sub>N<sub>3</sub>O<sub>4</sub>S<sub>3</sub> [M+Na]<sup>+</sup> 608.0743, Found: 608.0750.

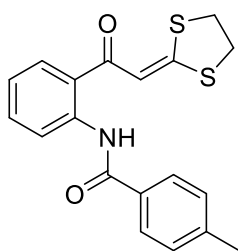

***N*-(2-(2-(1,3-dithiolan-2-ylidene)acetyl)phenyl)-4-methylbenzamide (5l)**

The title compound was isolated as a pale-yellow solid (PE/EA = 5:1, 51.0 mg, 77%). M.p.: 130-131 °C. <sup>1</sup>H NMR (600 MHz, CDCl<sub>3</sub>) δ 12.62 (s, 1H), 8.88 (d, *J* = 8.4 Hz, 1H), 8.00 (d, *J* = 8.0 Hz, 2H), 7.82 (d, *J* = 7.8 Hz, 1H), 7.54 (t, *J* = 7.7 Hz, 1H), 7.36 (s, 1H), 7.32 (d, *J* = 7.9 Hz, 2H), 7.12 (t, *J* = 7.6 Hz, 1H), 3.48 (t, *J* = 6.4 Hz, 2H), 3.38 (t, *J* = 6.4 Hz, 2H), 2.42 (s, 3H). <sup>13</sup>C NMR (150 MHz, CDCl<sub>3</sub>) δ 189.2, 170.2, 166.0, 142.3, 141.2, 133.7, 132.4, 129.5, 129.4, 127.7, 124.0, 122.5, 121.3, 109.6, 39.1, 35.6, 21.6. HRMS (ESI): Calcd for C<sub>19</sub>H<sub>17</sub>NO<sub>2</sub>S<sub>2</sub> [M+Na]<sup>+</sup> 378.0593, Found: 378.0601.

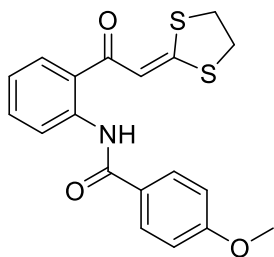

***N*-(2-(2-(1,3-dithiolan-2-ylidene)acetyl)phenyl)-4-methoxybenzamide (5m)**

The title compound was isolated as a pale-yellow solid (PE/EA = 5:1, 44.2 mg, 64%). M.p.: 129-130 °C. <sup>1</sup>H NMR (600 MHz, CDCl<sub>3</sub>) δ 12.58 (s, 1H), 8.87 (d, *J* = 7.9 Hz, 1H), 8.09 - 8.04 (m, 2H), 7.83 (dd, *J* = 8.0, 1.1 Hz, 1H), 7.56 - 7.51 (m, 1H), 7.37 (s, 1H), 7.13 - 7.09 (m, 1H), 7.04 - 6.98 (m, 2H), 3.87 (s, 3H), 3.49 (dd, *J* = 7.2, 5.6 Hz, 2H), 3.39 (dd, *J* = 7.3, 5.6 Hz, 2H). <sup>13</sup>C NMR (150 MHz, CDCl<sub>3</sub>) δ 189.3, 170.1, 165.6, 162.6, 141.4, 133.8, 129.6, 129.4, 127.5, 124.0, 122.4, 121.2, 114.0, 109.7, 55.6, 39.2, 35.6. HRMS (ESI): Calcd for C<sub>19</sub>H<sub>17</sub>NO<sub>3</sub>S<sub>2</sub> [M+Na]<sup>+</sup> 394.0542, Found: 394.0533.

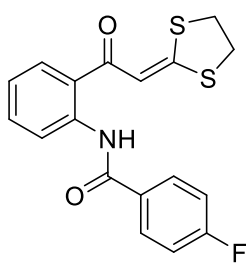

***N*-(2-(2-(1,3-dithiolan-2-ylidene)acetyl)phenyl)-4-fluorobenzamide (5n)**

The title compound was isolated as a pale-yellow solid (PE/EA = 5:1, 58.1 mg, 87%). M.p.: 120-121 °C. <sup>1</sup>H NMR (600 MHz, CDCl<sub>3</sub>) δ 12.70 (s, 1H), 8.85 (d, *J* = 8.4 Hz, 1H), 8.11 (dd, *J* = 8.7, 5.3 Hz, 2H), 7.84 (d, *J* = 7.9 Hz, 1H), 7.54 (t, *J* = 7.8 Hz, 1H), 7.36 (s, 1H), 7.19 (t, *J* = 8.6 Hz, 2H), 7.13 (t, *J* = 7.6 Hz, 1H), 3.50 (t, *J* = 6.4 Hz, 2H), 3.39 (t, *J* = 6.4 Hz, 2H). <sup>13</sup>C NMR (150 MHz, CDCl<sub>3</sub>) δ 189.3, 170.6, 165.1 (d, *J*<sub>C-F</sub> = 250.5 Hz), 164.9, 141.1, 133.9, 131.4 (d, *J*<sub>C-F</sub> = 3.0 Hz), 130.1 (d, *J*<sub>C-F</sub> = 9.0 Hz), 129.5, 124.0, 122.8, 121.2, 115.9 (d, *J*<sub>C-F</sub> = 21.9 Hz), 109.5, 39.2, 35.7. <sup>19</sup>F NMR (565 MHz, CDCl<sub>3</sub>) δ -108.02. HRMS (ESI): Calcd for C<sub>18</sub>H<sub>14</sub>FN<sub>2</sub>O<sub>2</sub>S<sub>2</sub> [M+Na]<sup>+</sup> 382.0342, Found: 382.0341.

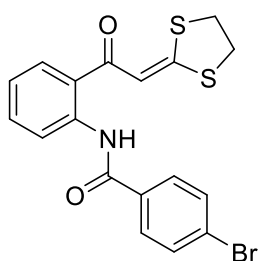

***N*-(2-(2-(1,3-dithiolan-2-ylidene)acetyl)phenyl)-4-bromobenzamide (5o)**

The title compound was isolated as a pale-yellow solid (PE/EA = 5:1, 70.5 mg, 89%). M.p.: 159-160 °C. <sup>1</sup>H NMR (600 MHz, CDCl<sub>3</sub>) δ 12.75 (s, 1H), 8.83 (d, *J* = 8.3 Hz, 1H), 7.96 (d, *J* = 8.5 Hz, 2H), 7.82 (d, *J* = 8.0 Hz, 1H), 7.65 (t, *J* = 6.9 Hz, 2H), 7.56 - 7.51 (m, 1H), 7.36 (d, *J* = 11.4 Hz, 1H), 7.16 - 7.09 (m, 1H), 3.50 - 3.44 (m, 2H), 3.40 - 3.35 (m, 2H). <sup>13</sup>C NMR (150 MHz, CDCl<sub>3</sub>) δ 189.2, 170.8, 165.0, 141.0, 134.1, 133.9, 132.1, 129.4, 129.3, 126.7, 124.0, 122.9, 121.2, 109.5, 39.2, 35.7. HRMS (ESI): Calcd for C<sub>18</sub>H<sub>14</sub>BrNO<sub>2</sub>S<sub>2</sub> [M+H]<sup>+</sup> 419.9722, Found: 419.9719.

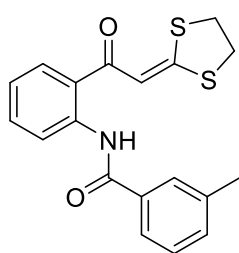

***N*-(2-(2-(1,3-dithiolan-2-ylidene)acetyl)phenyl)-3-methylbenzamide**

**(5p)**

The title compound was isolated as a pale-yellow solid (PE/EA = 5:1, 56.0 mg, 85%). M.p.: 95-96 °C. <sup>1</sup>H NMR (600 MHz, CDCl<sub>3</sub>) δ 12.63 (s, 1H), 8.88 (d, *J* = 8.4 Hz, 1H), 7.92 (s, 1H), 7.89 (d, *J* = 7.7 Hz, 1H), 7.83 (d, *J* = 7.9 Hz, 1H), 7.54 (t, *J* = 7.8 Hz, 1H), 7.41 (t, *J* = 7.6 Hz, 1H), 7.35 (d, *J* = 8.6 Hz, 2H), 7.13 (t, *J* = 7.6 Hz, 1H), 3.48 (t, *J* = 6.0 Hz, 2H), 3.38 (t, *J* = 6.1 Hz, 2H), 2.46 (s, 3H). <sup>13</sup>C NMR (150 MHz, CDCl<sub>3</sub>) δ 189.2, 170.3, 166.2, 141.1, 138.6, 135.1, 133.7, 132.6, 129.4, 128.7, 128.5, 124.6, 124.1, 122.6, 121.3, 109.6, 77.4, 77.2, 77.0, 39.2, 35.6, 21.6. HRMS (ESI): Calcd for C<sub>19</sub>H<sub>17</sub>NO<sub>2</sub>S<sub>2</sub> [M+Na]<sup>+</sup> 378.0593, Found: 378.0586.

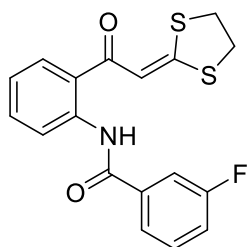

***N*-(2-(2-(1,3-dithiolan-2-ylidene)acetyl)phenyl)-3-fluorobenzamide**

**(5q)**

The title compound was isolated as a pale-yellow solid (PE/EA = 5:1, 60.9 mg, 91%). M.p.: 120-121 °C. <sup>1</sup>H NMR (600 MHz, CDCl<sub>3</sub>) δ 12.75 (s, 1H), 8.85 (d, *J* = 8.4 Hz, 1H), 7.88 (d, *J* = 7.8 Hz, 1H), 7.86 - 7.83 (m, 1H), 7.82 - 7.79 (m, 1H), 7.57 - 7.53 (m, 1H), 7.50 (td, *J* = 8.0, 5.7 Hz, 1H), 7.37 (s, 1H), 7.24 (td, *J* = 8.5, 2.5 Hz, 1H), 7.16 - 7.13 (m, 1H), 3.50 (t, *J* = 6.4 Hz, 2H), 3.40 (t, *J* = 6.4 Hz, 2H). <sup>13</sup>C NMR (150 MHz, CDCl<sub>3</sub>) δ 189.2, 170.8, 164.6 (d, *J* = 2.4 Hz), 163.0 (d, *J* = 245.7 Hz), 140.9, 137.5 (d, *J* = 6.9 Hz), 133.8, 130.5 (d, *J* = 7.8 Hz), 129.4, 124.0, 123.1 (d, *J* = 2.9 Hz), 123.0, 121.3, 118.9 (d, *J* = 21.3 Hz), 115.0 (d, *J* = 22.8 Hz), 109.4, 39.2, 35.7. <sup>19</sup>F NMR (565 MHz, CDCl<sub>3</sub>) δ -111.87. HRMS (ESI): Calcd for C<sub>18</sub>H<sub>14</sub>FNO<sub>2</sub>S<sub>2</sub> [M+Na]<sup>+</sup> 382.0342, Found: 382.0347.

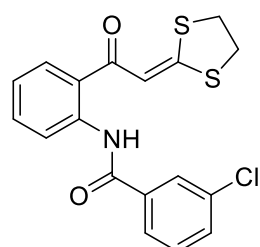

***N*-(2-(2-(1,3-dithiolan-2-ylidene)acetyl)phenyl)-3-chlorobenzamide**

**(5r)**

The title compound was isolated as a pale-yellow solid (PE/EA = 5:1, 67.5 mg, 96%). M.p.: 100-101 °C. <sup>1</sup>H NMR (600 MHz, CDCl<sub>3</sub>) δ 12.76 (s, 1H), 8.84 (d, *J* = 8.4 Hz, 1H), 8.09 (s, 1H), 7.97 (d, *J* = 7.6 Hz, 1H), 7.84 (d, *J* = 7.9 Hz, 1H), 7.58 - 7.49 (m, 2H), 7.46 (t, *J* = 7.8 Hz, 1H), 7.37 (s, 1H), 7.15 (t, *J* = 7.6 Hz, 1H), 3.51 (t, *J* = 6.3 Hz, 2H), 3.41 (t, *J* = 6.2 Hz, 2H). <sup>13</sup>C NMR (150 MHz, CDCl<sub>3</sub>) δ 189.1, 170.9, 164.5, 140.8, 137.0, 135.0, 133.8, 131.8, 130.1, 129.4, 128.2, 125.5, 124.0,



123.0, 121.2, 109.3, 39.2, 35.6. HRMS (ESI): Calcd for C<sub>18</sub>H<sub>14</sub>ClNO<sub>2</sub>S<sub>2</sub> [M+Na]<sup>+</sup> 398.0047, Found: 398.0053.

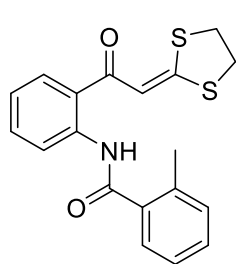

***N*-(2-(2-(1,3-dithiolan-2-ylidene)acetyl)phenyl)-2-methylbenzamide (5s)**

The title compound was isolated as a pale-yellow solid (PE/EA = 5:1, 52.7 mg, 80%). M.p.: 136-137 °C. <sup>1</sup>H NMR (600 MHz, CDCl<sub>3</sub>) δ 11.99 (s, 1H), 8.86 (d, *J* = 8.3 Hz, 1H), 7.82 (dd, *J* = 8.0, 1.2 Hz, 1H), 7.65 (d, *J* = 6.9 Hz, 1H), 7.57 - 7.53 (m, 1H), 7.36 (td, *J* = 7.5, 1.1 Hz, 1H), 7.33 (s, 1H), 7.30 - 7.25 (m, 2H), 7.16 - 7.12 (m, 1H), 3.45 (dd, *J* = 7.3, 5.5 Hz, 2H), 3.37 (dd, *J* = 7.2, 5.4 Hz, 2H), 2.56 (s, 3H). <sup>13</sup>C NMR (150 MHz, CDCl<sub>3</sub>) δ 189.0, 170.1, 168.7, 140.9, 137.1, 136.7, 133.7, 131.5, 130.3, 129.4, 127.5, 126.1, 124.3, 122.8, 121.3, 109.6, 39.1, 35.6, 20.4. HRMS (ESI): Calcd for C<sub>19</sub>H<sub>17</sub>NO<sub>2</sub>S<sub>2</sub> [M+Na]<sup>+</sup> 378.0593, Found: 378.0584.

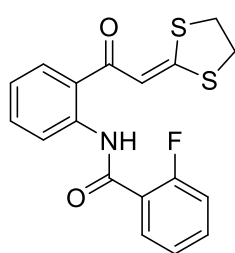

***N*-(2-(2-(1,3-dithiolan-2-ylidene)acetyl)phenyl)-2-fluorobenzamide (5t)**

The title compound was isolated as a pale-yellow solid (PE/EA = 5:1, 54.7 mg, 82%). M.p.: 101-102 °C. <sup>1</sup>H NMR (600 MHz, CDCl<sub>3</sub>) δ 12.26 (d, *J* = 6.0 Hz, 1H), 8.82 (d, *J* = 8.4 Hz, 1H), 8.06 - 8.02 (m, 1H), 7.79 (d, *J* = 7.8 Hz, 1H), 7.53 (t, *J* = 7.8 Hz, 1H), 7.49 (dd, *J* = 13.0, 6.3 Hz, 1H), 7.30 (s, 1H), 7.27 (t, *J* = 7.5 Hz, 1H), 7.20 (dd, *J* = 10.9, 8.5 Hz, 1H), 7.15 (t, *J* = 7.6 Hz, 1H), 3.47 (t, *J* = 6.4 Hz, 2H), 3.37 (t, *J* = 6.3 Hz, 2H). <sup>13</sup>C NMR (150 MHz, CDCl<sub>3</sub>) δ 188.7, 170.0, 162.6 (d, *J*<sub>C-F</sub> = 2.4 Hz), 160.5 (d, *J*<sub>C-F</sub> = 250.2 Hz), 140.0, 133.4 (d, *J*<sub>C-F</sub> = 9.0 Hz), 133.3, 131.6 (d, *J*<sub>C-F</sub> = 2.0 Hz), 129.2, 125.3, 124.6 (d, *J*<sub>C-F</sub> = 3.6 Hz), 123.2 (d, *J*<sub>C-F</sub> = 11.9 Hz), 123.2, 122.1, 116.6 (d, *J*<sub>C-F</sub> = 23.4 Hz), 109.7, 39.1, 35.6. <sup>19</sup>F NMR (565 MHz, CDCl<sub>3</sub>) δ -112.07. HRMS (ESI): Calcd for C<sub>18</sub>H<sub>14</sub>FNO<sub>2</sub>S<sub>2</sub> [M+Na]<sup>+</sup> 382.0342, Found: 382.0333.

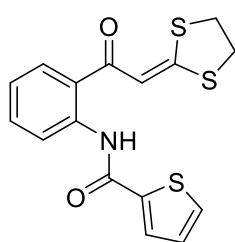

***N*-(2-(2-(1,3-dithiolan-2-ylidene)acetyl)phenyl)thiophene-2-carboxamide (5u)**

The title compound was isolated as a pale-yellow solid (PE/EA = 5:1, 52.1 mg, 81%). M.p.: 155-156 °C. <sup>1</sup>H NMR (600 MHz, CDCl<sub>3</sub>) δ 12.76 (s, 1H). 8.80 - 8.78 (m, 1H). 7.86 (dd, *J* = 3.7, 0.9 Hz, 1H), 7.82 (dd, *J* = 8.0, 1.2 Hz, 1H). 7.54 (dd, *J* = 5.0, 0.9 Hz, 1H), 7.54 - 7.50 (m, 1H). 7.36 (s, 1H), 7.15 (dd, *J*

= 4.9, 3.8 Hz, 1H), 7.13 - 7.09 (m, 1H). 3.49 (dd,  $J = 7.4, 5.5$  Hz, 2H), 3.39 (dd,  $J = 7.3, 5.5$  Hz, 2H).  $^{13}\text{C}$  NMR (150 MHz,  $\text{CDCl}_3$ )  $\delta$  189.1, 170.6, 160.6, 141.0, 140.8, 133.8, 131.1, 129.4, 128.7, 128.0, 123.5, 122.6, 121.0, 109.4, 39.2, 35.6. HRMS (ESI): Calcd for  $\text{C}_{16}\text{H}_{13}\text{NO}_2\text{S}_3$   $[\text{M}+\text{Na}]^+$  370.0001, Found: 370.0009.

## Derivatization Reactions

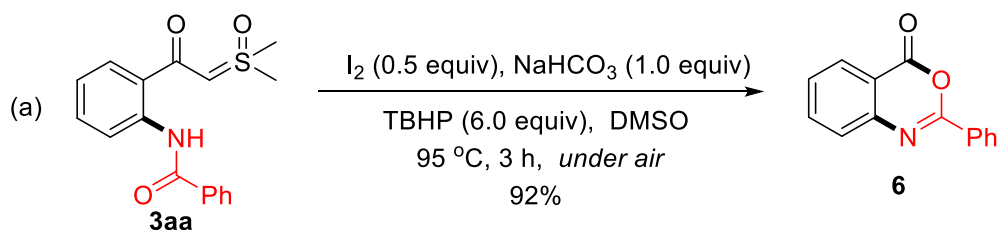

### 2-phenyl-4H-benzo[d][1,3]oxazin-4-one (6)

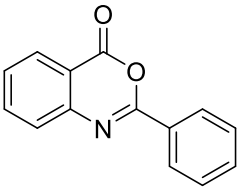 A mixture of **3aa** (0.1 mmol), I<sub>2</sub> (6.5 mg, 0.05 mmol, 0.5 equiv), NaHCO<sub>3</sub> (8.5 mg, 0.1 mmol, 1.0 equiv) and TBHP (78.0 mg, 0.6 mmol, 6.0 equiv) was added to a Schlenk tube equipped with a stir bar. DMSO (1.0 mL) was added and the mixture was stirred at 95 °C for 3 h under air atmosphere. The mixture was evaporated under reduced pressure and the residue was adsorbed onto small amounts of silica. The purification was performed by flash column chromatography on silica gel (eluent: PE/EA = 5:1). The title compound was isolated as a pale-yellow solid (PE/EA = 5:1, 20.4 mg, 92%). <sup>1</sup>H NMR (600 MHz, CDCl<sub>3</sub>) δ 8.32 (d, *J* = 7.9 Hz, 2H), 8.25 (d, *J* = 7.8 Hz, 1H), 7.83 (t, *J* = 7.7 Hz, 1H), 7.70 (d, *J* = 8.1 Hz, 1H), 7.58 (t, *J* = 7.3 Hz, 1H), 7.52 (t, *J* = 7.5 Hz, 3H). <sup>13</sup>C NMR (150 MHz, CDCl<sub>3</sub>) δ 159.7, 157.3, 147.2, 136.7, 132.8, 130.4, 128.9, 128.8, 128.5, 128.4, 127.4, 117.2. HRMS (ESI): Calcd for C<sub>14</sub>H<sub>9</sub>NO<sub>2</sub> [M+H]<sup>+</sup> 224.0706, Found: 224.0711.

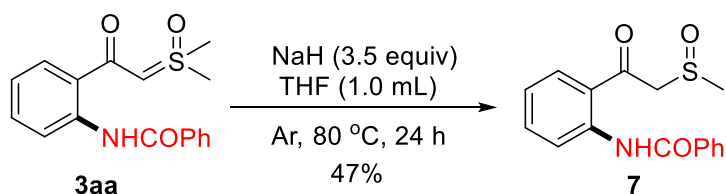

### *N*-(2-(2-(methylsulfinyl)acetyl)phenyl)benzamide (7)

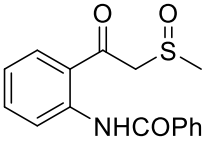 A mixture of **3aa** (0.1 mmol) and NaH (60%, dispersion in paraffin liquid) (14.0 mg, 0.35 mmol, 3.5 equiv) was added to a Schlenk tube equipped with a stir bar. Dry THF (1.0 mL) was added and the mixture was stirred at 80 °C for 24 h under Ar atmosphere. The mixture was evaporated under reduced pressure and the residue was adsorbed onto small amounts of silica. Purification was performed by flash column chromatography on silica gel (eluent: EA). The title compound was isolated as a pale-yellow solid (EA, 14.0 mg, 47%). M.p.: 71-72 °C. <sup>1</sup>H NMR (600 MHz, CDCl<sub>3</sub>) δ 12.33 (s, 1H), 9.01

(d,  $J = 8.5$  Hz, 1H), 8.05 (d,  $J = 7.8$  Hz, 2H), 7.96 (d,  $J = 8.0$  Hz, 1H), 7.70 (t,  $J = 7.9$  Hz, 1H), 7.60 - 7.57 (m, 1H), 7.54 (t,  $J = 7.5$  Hz, 2H), 7.22 (t,  $J = 7.6$  Hz, 1H), 4.54 (d,  $J = 14.3$  Hz, 1H), 4.38 (d,  $J = 14.3$  Hz, 1H), 2.80 (s, 3H).  $^{13}\text{C}$  NMR (150 MHz,  $\text{CDCl}_3$ )  $\delta$  196.3, 166.3, 142.3, 137.0, 134.6, 132.4, 132.4, 129.1, 127.6, 123.0, 121.4, 121.3, 63.8, 39.7. HRMS (ESI): Calcd for  $\text{C}_{16}\text{H}_{15}\text{NO}_3\text{S}$   $[\text{M}+\text{Na}]^+$  324.0665, Found: 324.0675.

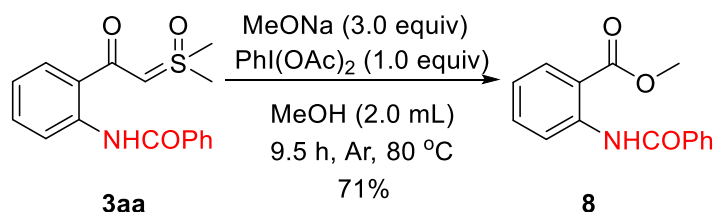

### methyl 2-benzamidobenzoate (8)

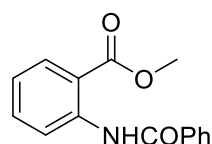

A mixture of **3aa** (0.1 mmol), MeONa (16.2 mg, 0.3 mmol, 3.0 equiv) and PhI(OAc)<sub>2</sub> (32.2 mg, 0.1 mmol, 1.0 equiv) was added to a Schlenk tube equipped with a stir bar. Dry MeOH (2.0 mL) was added and the mixture was stirred at 80 °C for 9.5 h under Ar atmosphere. The mixture was evaporated under reduced pressure and the residue was adsorbed onto small amounts of silica. The purification was performed by flash column chromatography on silica gel (eluent: PE/EA = 5:1). The title compound was isolated as a pale-yellow solid (PE/EA = 5:1, 18.0 mg, 71%). M.p.: 79-80 °C.  $^1\text{H}$  NMR (600 MHz,  $\text{CDCl}_3$ )  $\delta$  12.04 (s, 1H), 8.94 (d,  $J = 8.5$  Hz, 1H), 8.09 (d,  $J = 8.0$  Hz, 1H), 8.06 (d,  $J = 7.7$  Hz, 2H), 7.61 (t,  $J = 7.9$  Hz, 1H), 7.58 - 7.55 (m, 1H), 7.53 (t,  $J = 7.2$  Hz, 2H), 7.13 (t,  $J = 7.6$  Hz, 1H), 3.97 (s, 3H).  $^{13}\text{C}$  NMR (150 MHz,  $\text{CDCl}_3$ )  $\delta$  169.2, 165.9, 142.0, 135.1, 135.0, 132.1, 131.1, 129.0, 127.5, 122.8, 120.6, 115.3, 52.6. HRMS (ESI): Calcd for  $\text{C}_{15}\text{H}_{13}\text{NO}_3$   $[\text{M}+\text{Na}]^+$  278.0788, Found: 278.0779.

## KIE Experiments

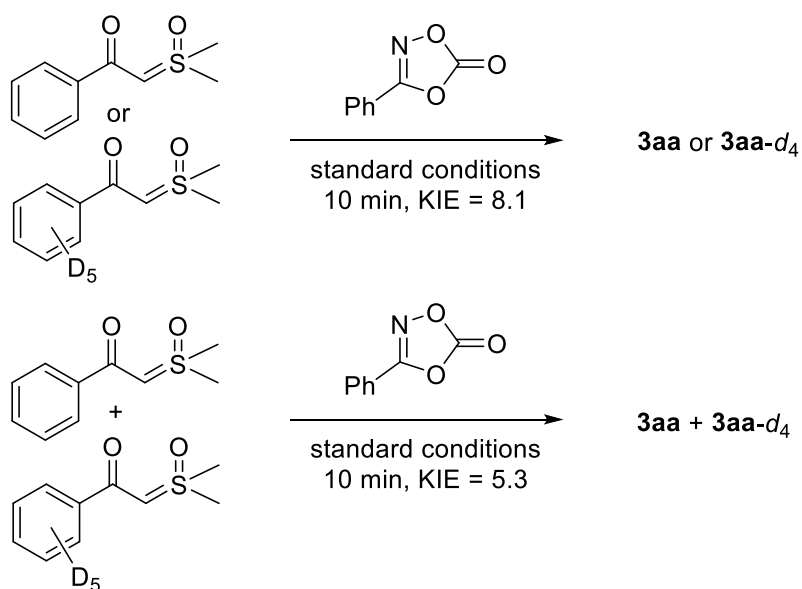

**Intermolecular, Competitive KIE Studies.** A mixture of **1a** (0.1 mmol) and **1a-d<sub>5</sub>** (0.1 mmol), **2a** (0.2 mmol), Cp\*Co(CO)I<sub>2</sub> (9.5 mg, 0.02 mmol, 10 mol %), AgSbF<sub>6</sub> (13.7 mg, 0.04 mmol, 20 mol %) and Zn(OAc)<sub>2</sub> (11.0 mg, 0.06 mmol, 30 mol %) was weighed into a Schlenk tube equipped with a stir bar. Dry DCE (2.0 mL) was added. The reaction mixtures were stirred in an oil bath at 60 °C for 10 minutes under Ar atmosphere. Afterwards, the solvent was evaporated under reduced pressure and the residue was absorbed to small amounts of silica. Purification was performed by flash column chromatography on silica gel (eluent: PE/EA = 1:1). <sup>1</sup>H NMR analysis revealed KIE = 8.1.

**Independent, Parallel KIE Studies.** Substrate **1a** (0.1 mmol) and **1a-d<sub>5</sub>** (0.1 mmol) were changed into two Schlenk tubes equipped with a stir bar, to each tube was added a mixture of **2a** (0.2 mmol), Cp\*Co(CO)I<sub>2</sub> (9.5 mg, 0.02 mmol, 10 mol %), AgSbF<sub>6</sub> (13.7 mg, 0.04 mmol, 20 mol %) and Zn(OAc)<sub>2</sub> (11.0 mg, 0.06 mmol, 30 mol %). Dry DCE (2.0 mL) was then added. The two reaction mixtures were stirred side-by-side in an oil bath at 60 °C for 10 minutes under Ar atmosphere. Afterwards, these two reactions were quenched in an oil bath, and the reaction mixtures were rapidly combined. The solvent was evaporated under reduced pressure and the residue was absorbed to small amounts of silica. Purification was performed by flash column chromatography on silica gel (eluent: PE/EA = 1:1). <sup>1</sup>H NMR analysis revealed KIE = 5.3.

$^1\text{H}$  NMR of product **3aa** and **3aa- $d_4$**  obtained from the KIE experiment.

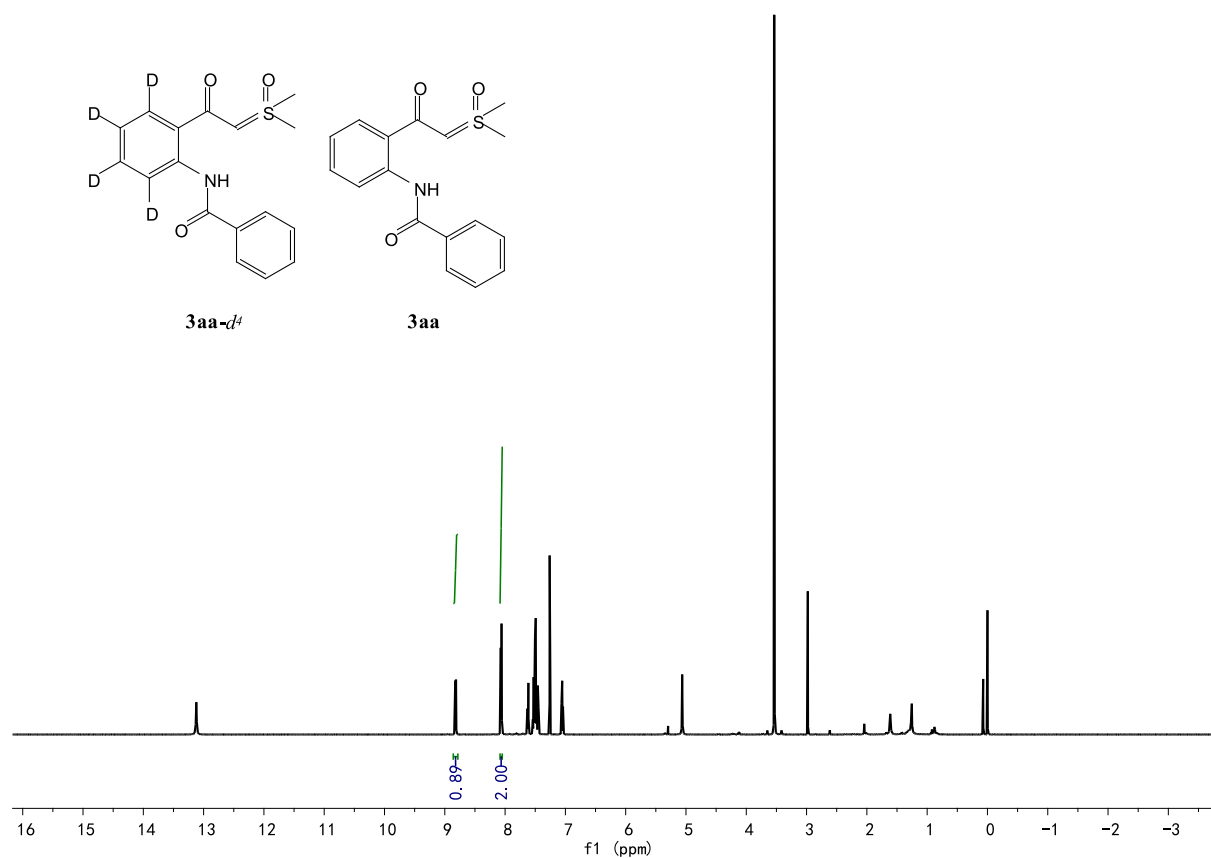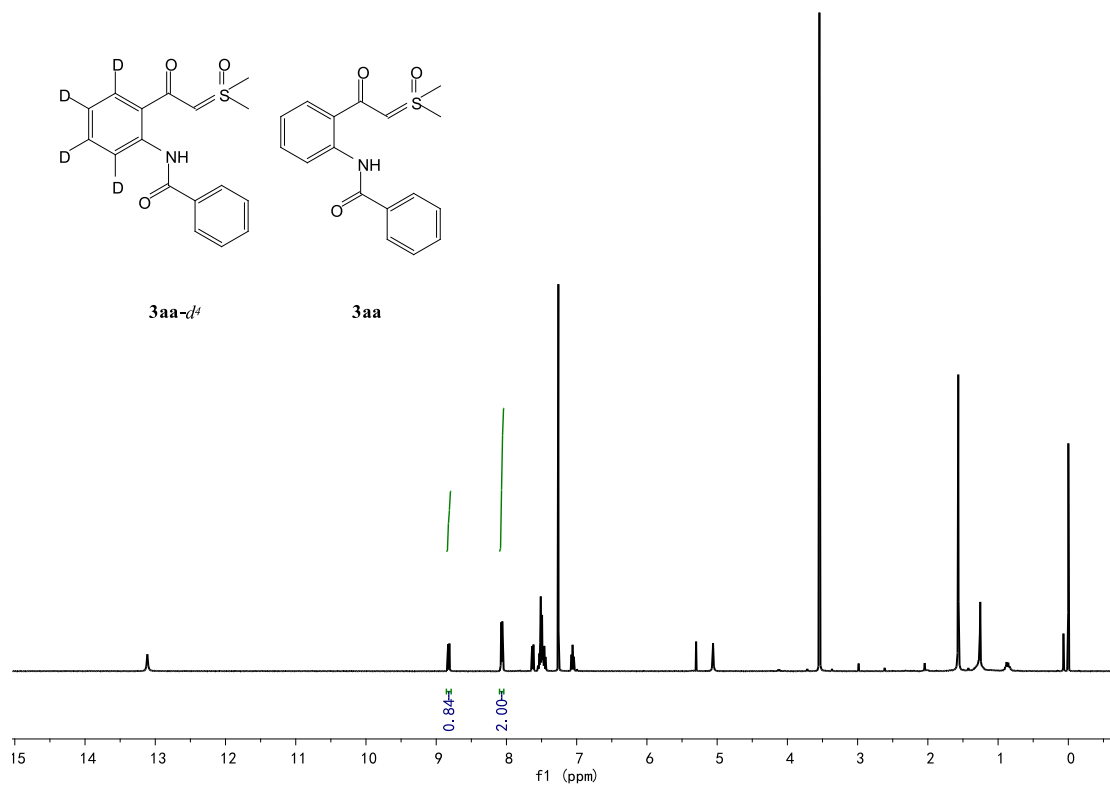

# Copies of $^1\text{H}$ , $^{13}\text{C}$ , and $^{19}\text{F}$ NMR Spectra of the Products

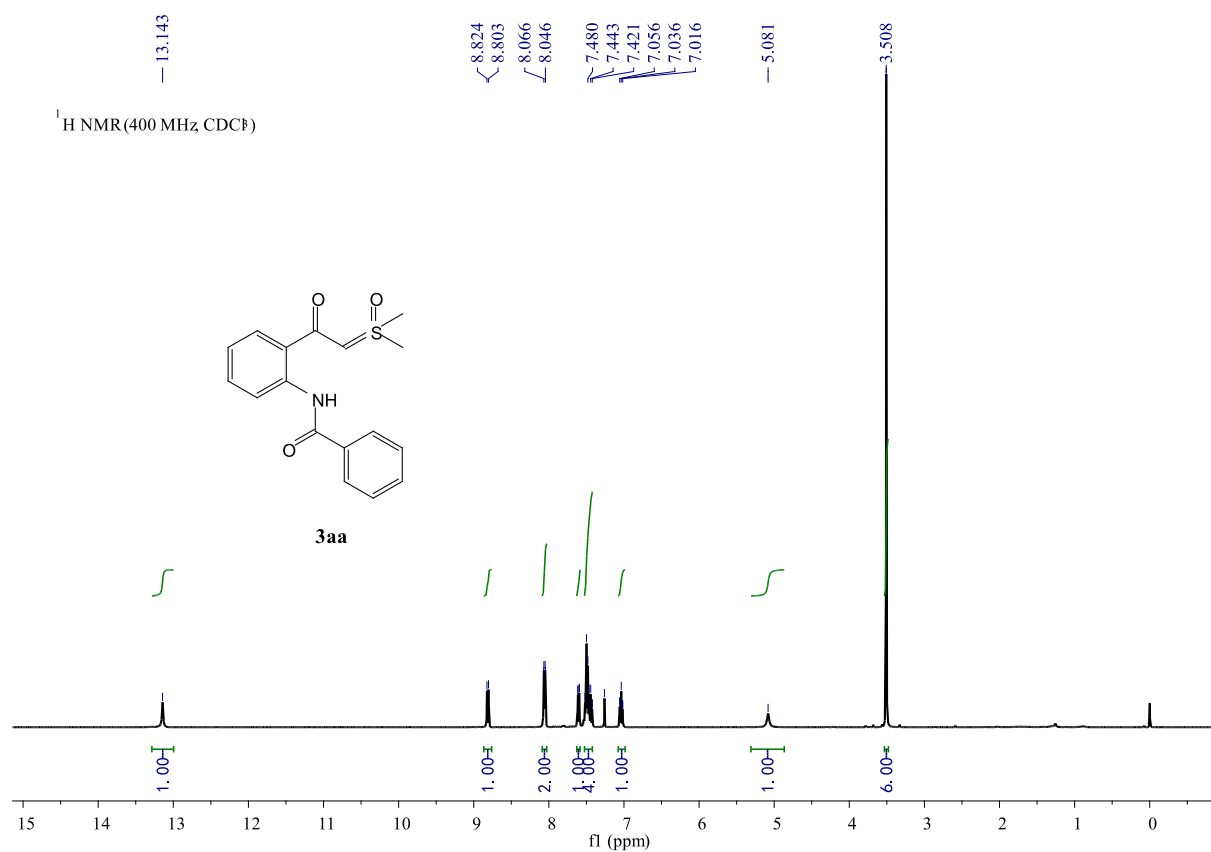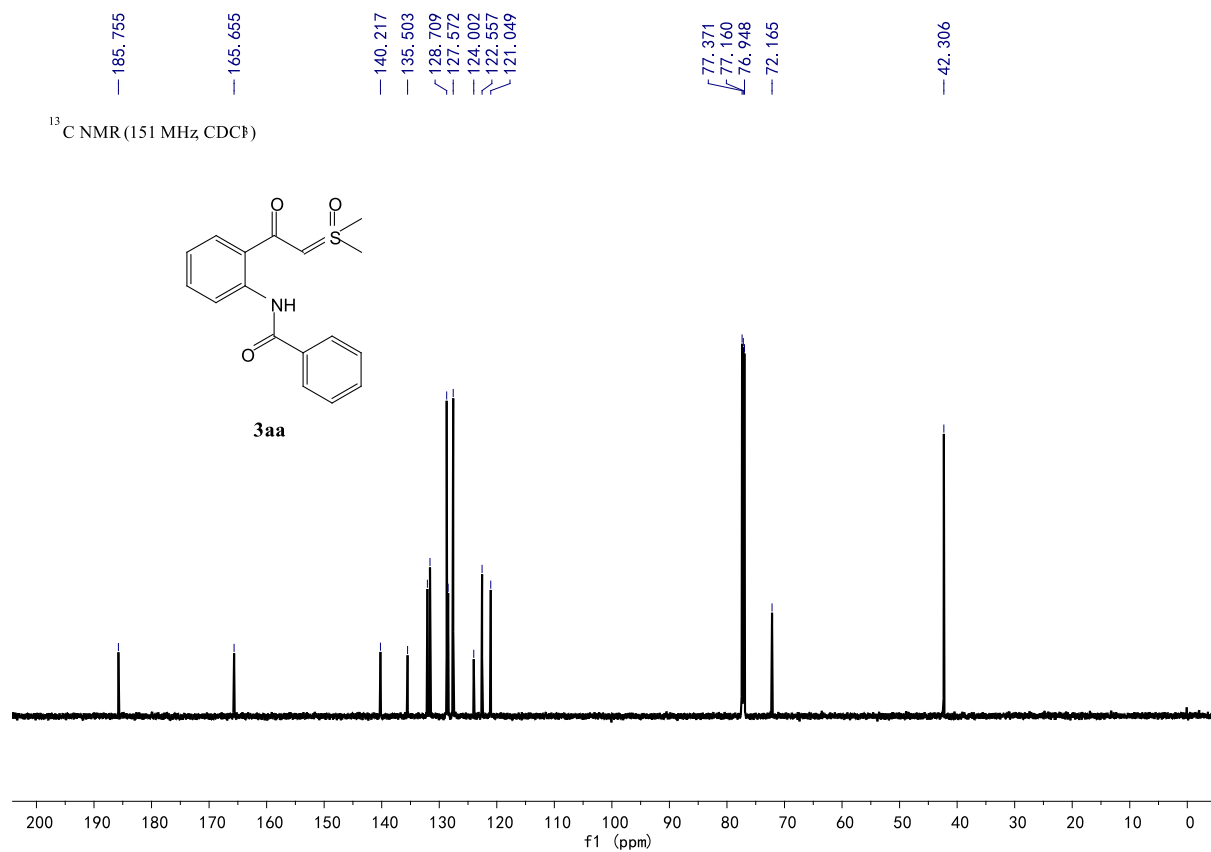

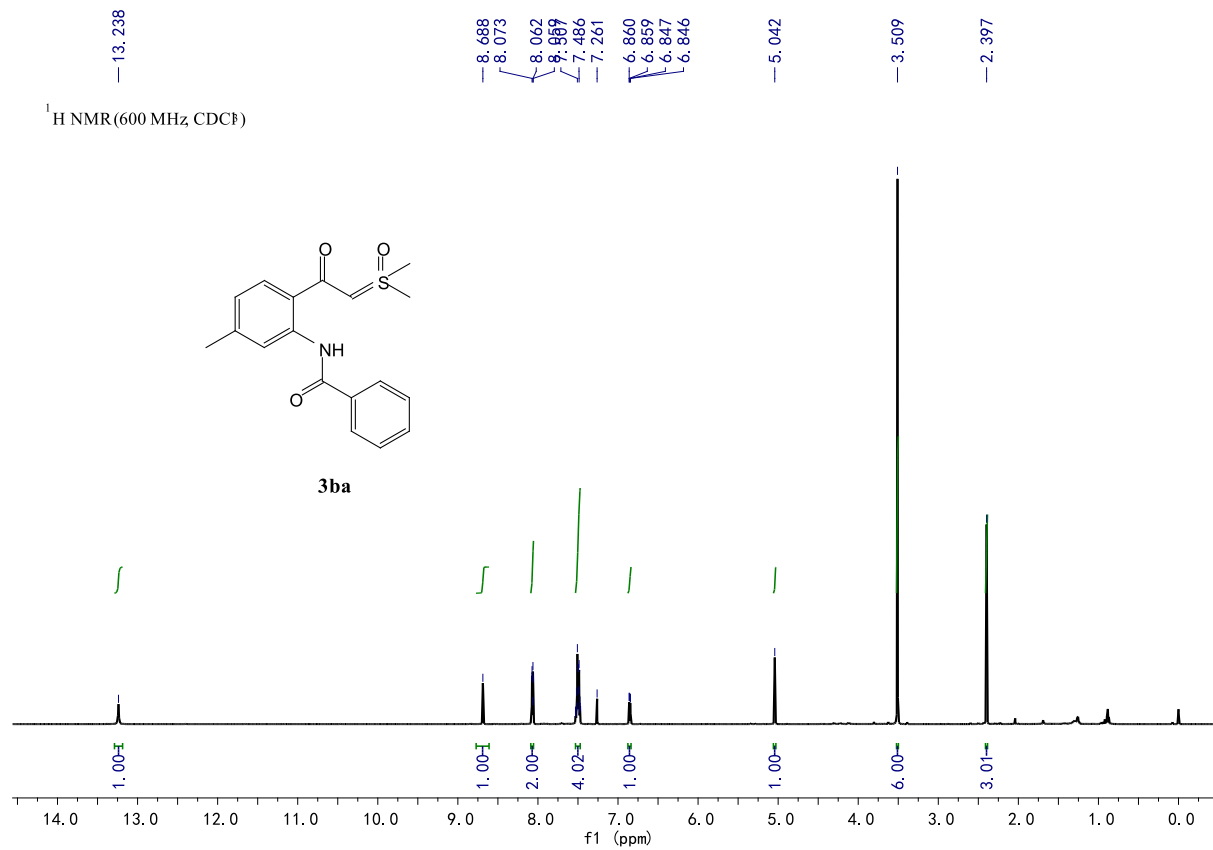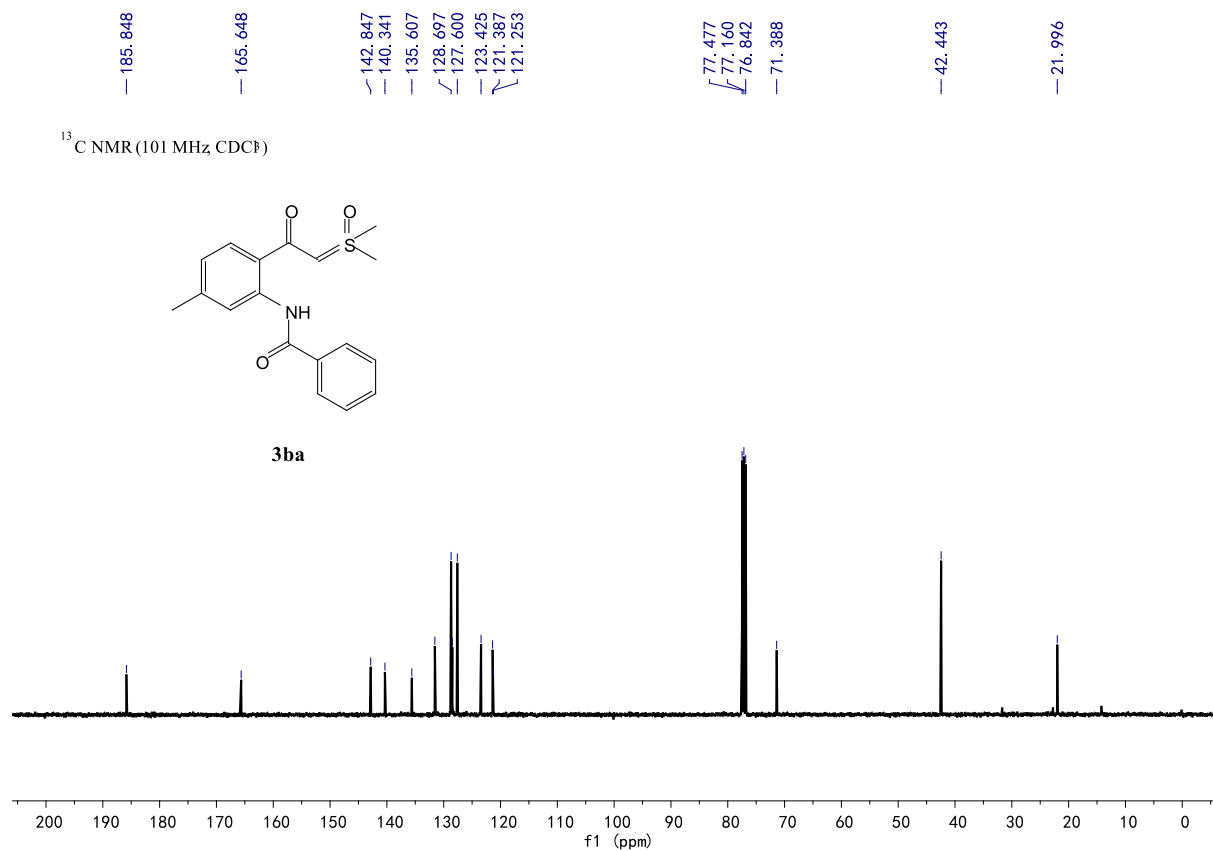



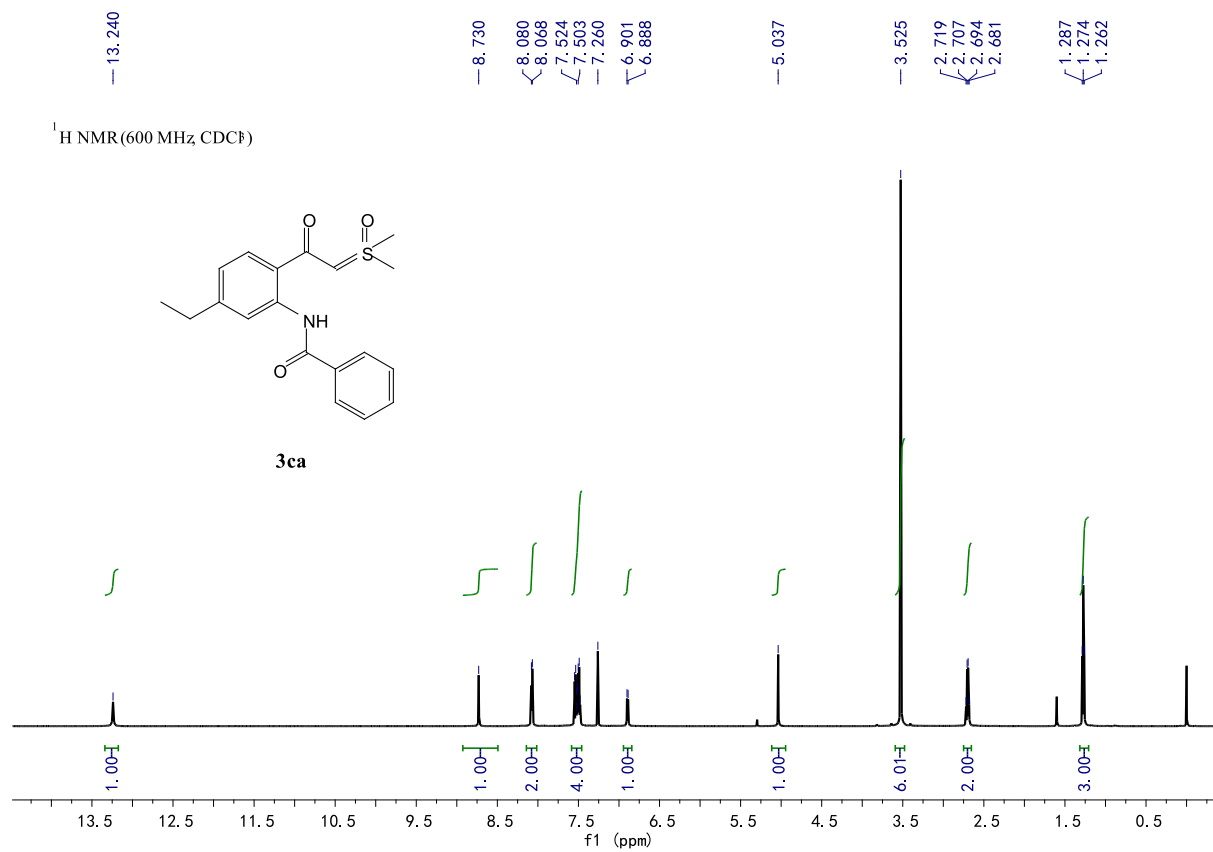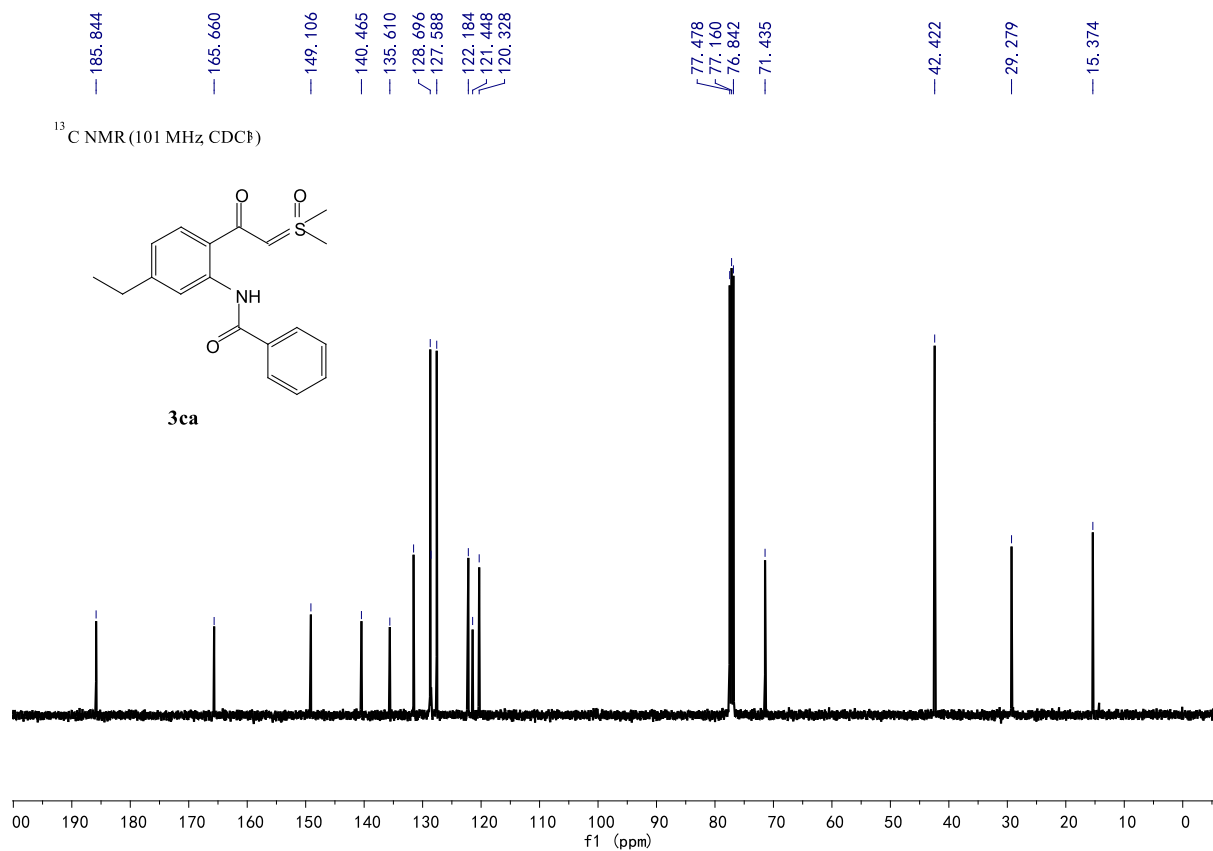

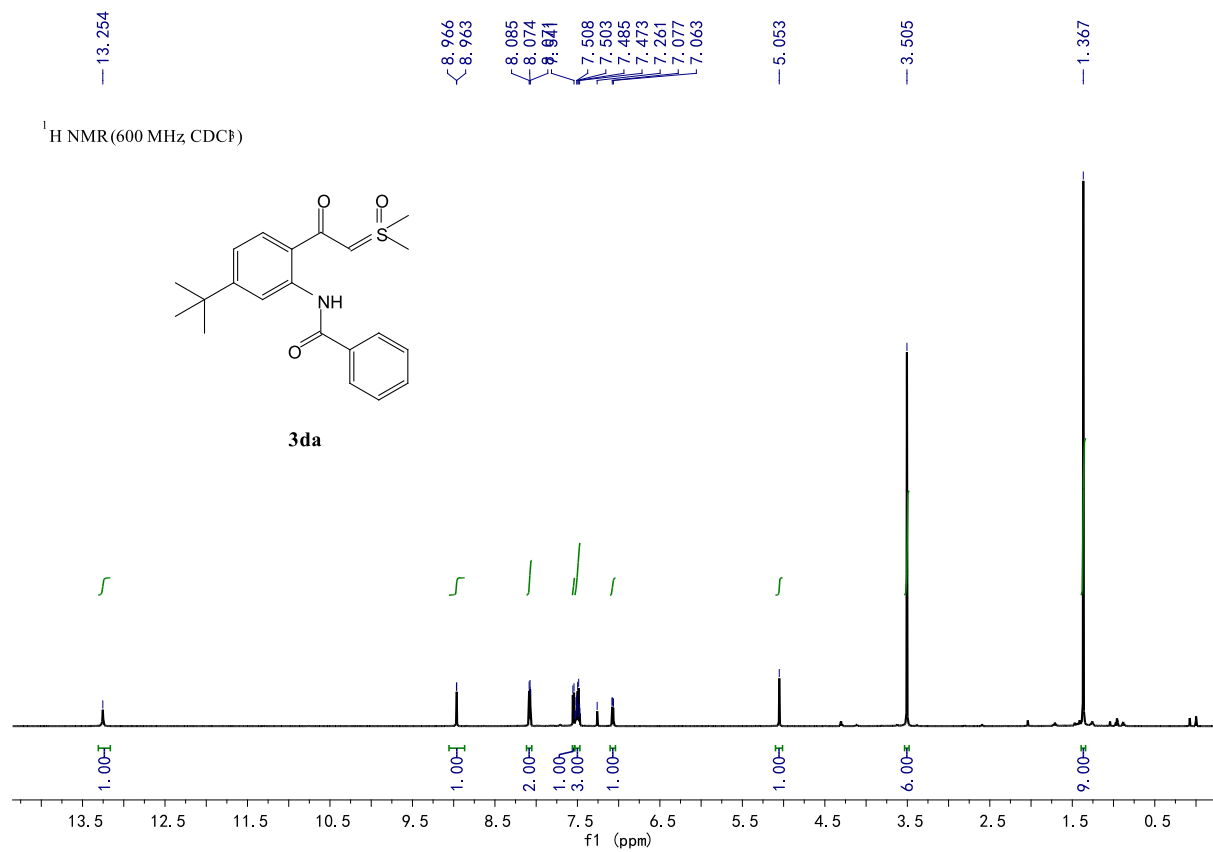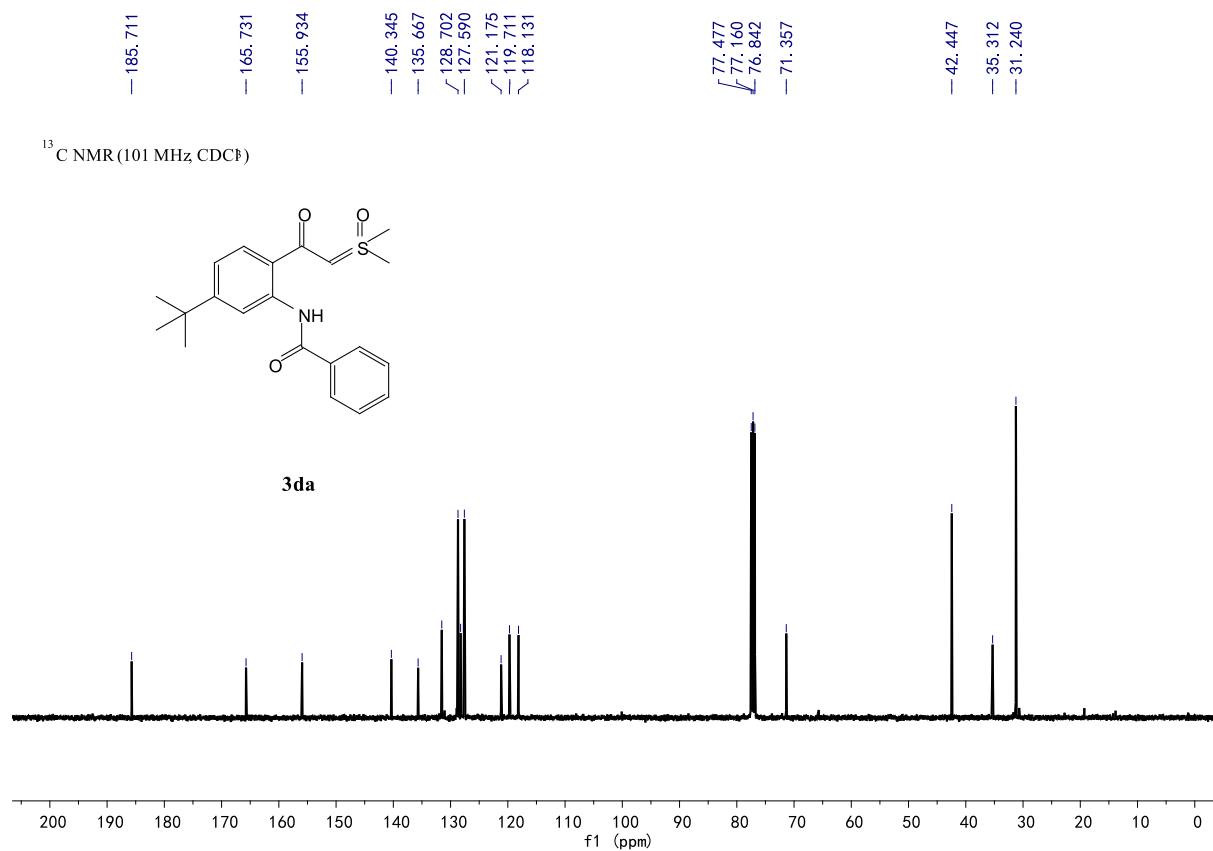

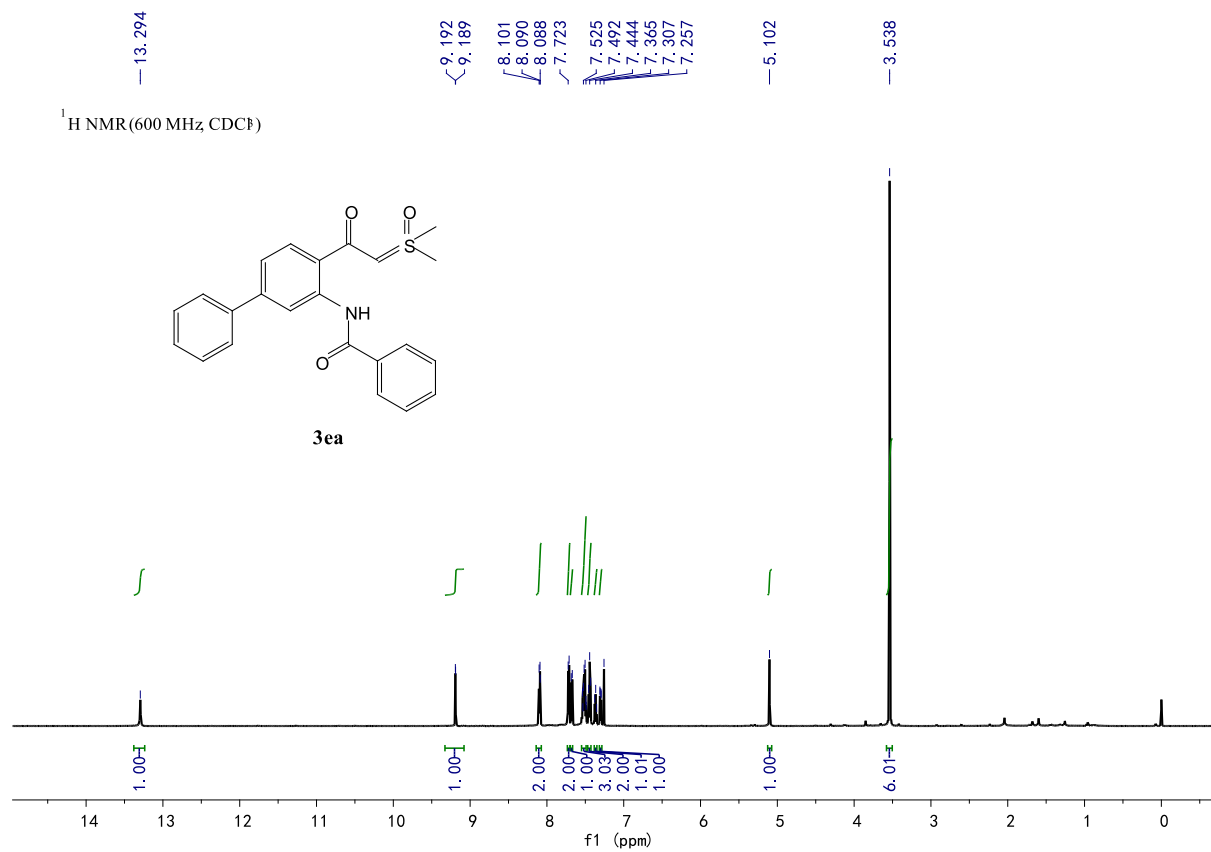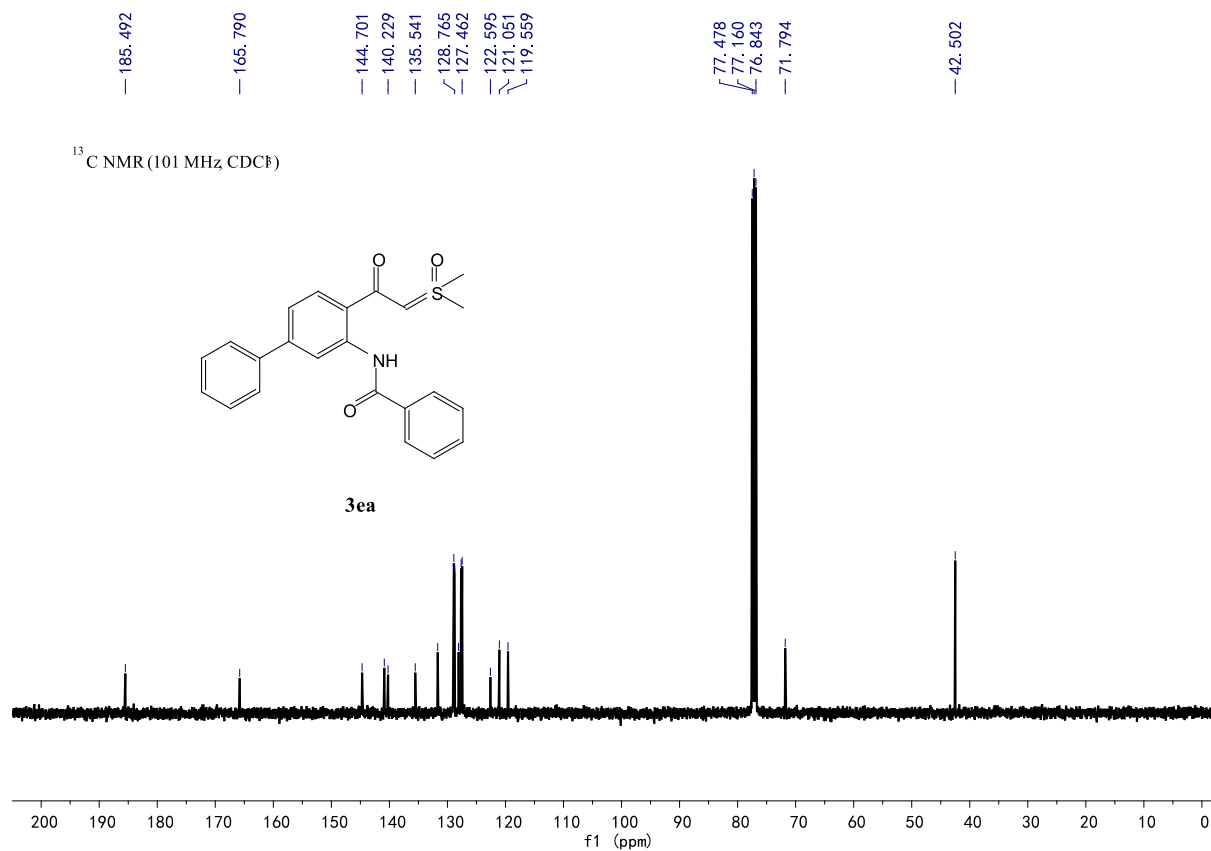

<sup>1</sup>H NMR (600 MHz, DMSO)

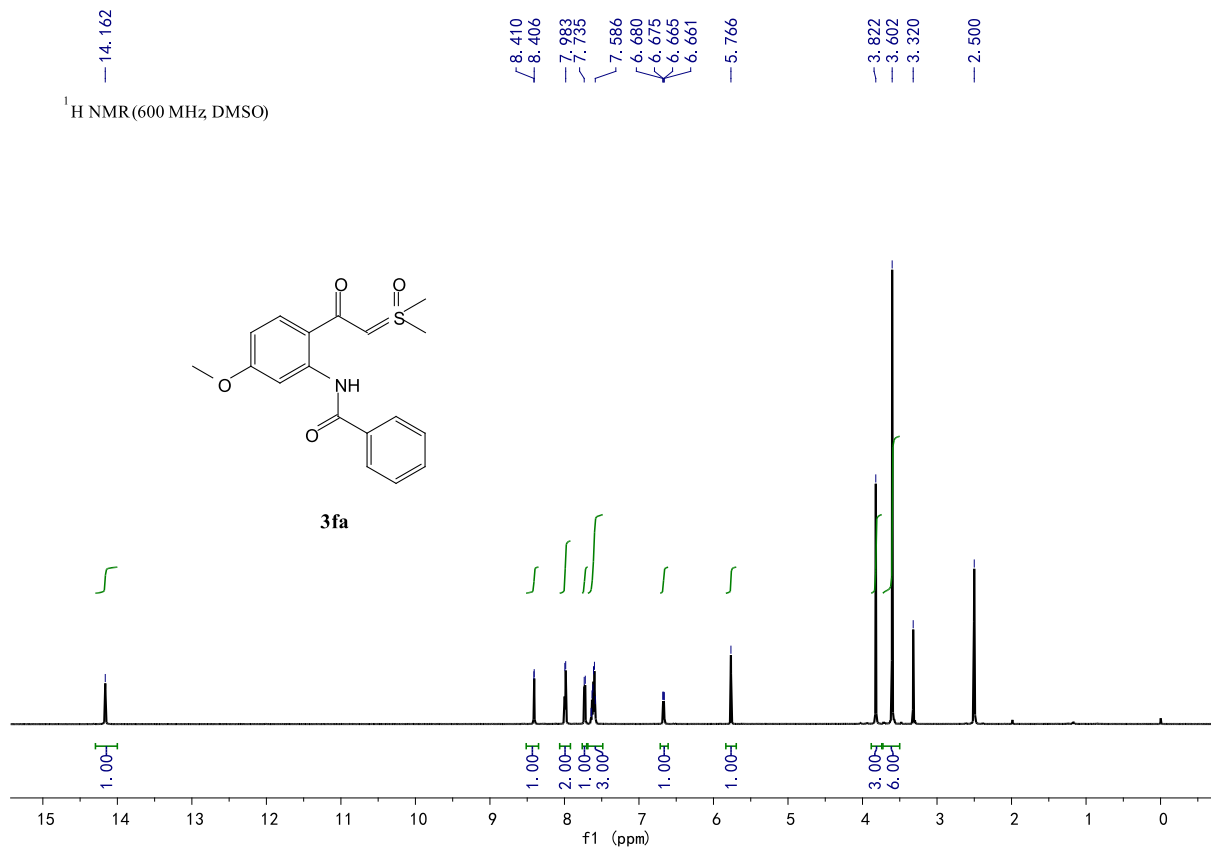

<sup>13</sup>C NMR (101 MHz, DMSO)

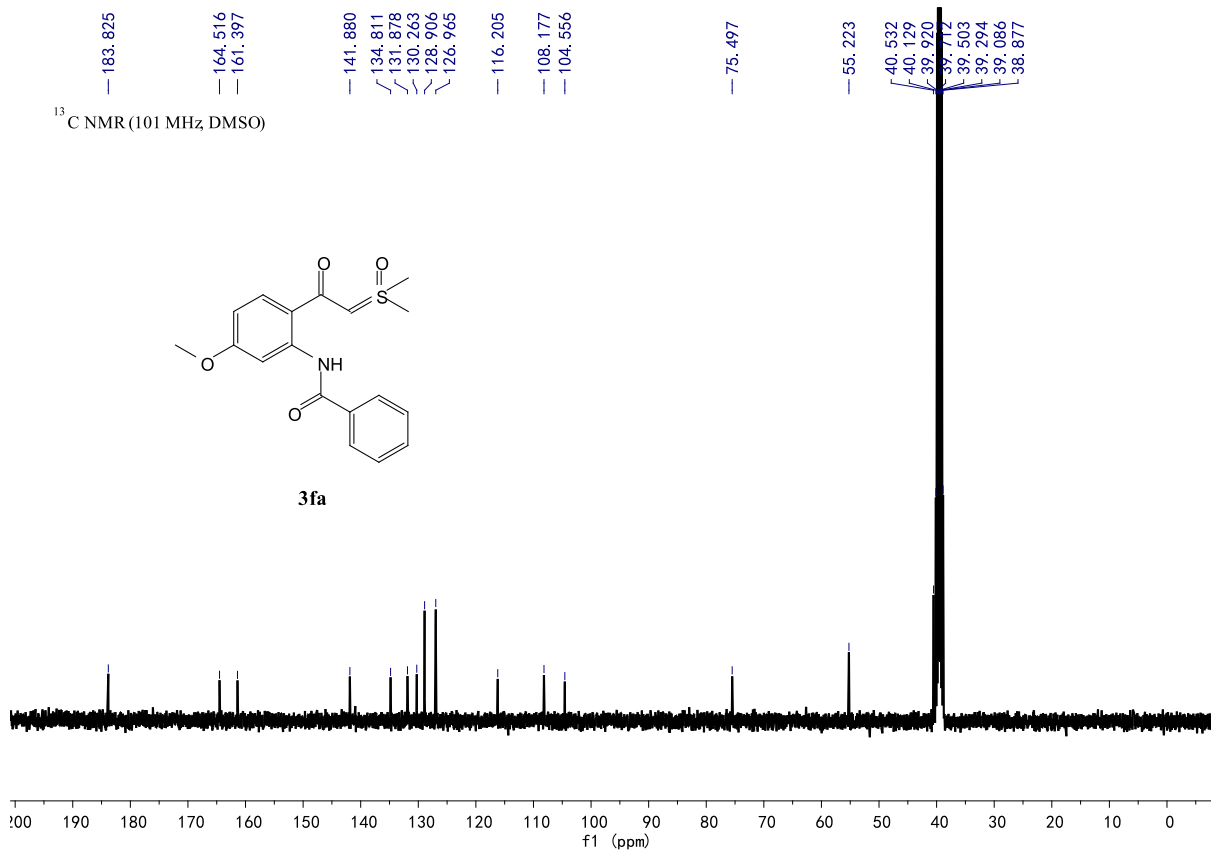

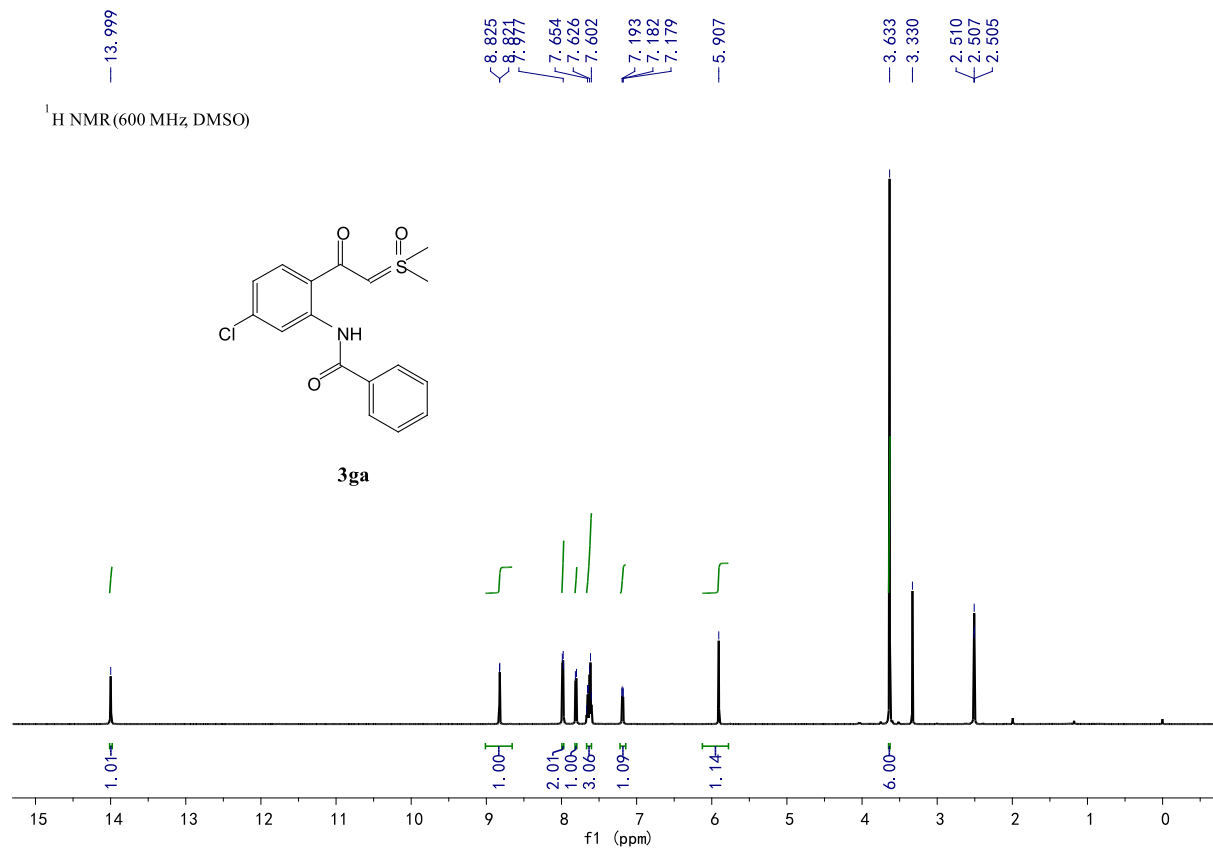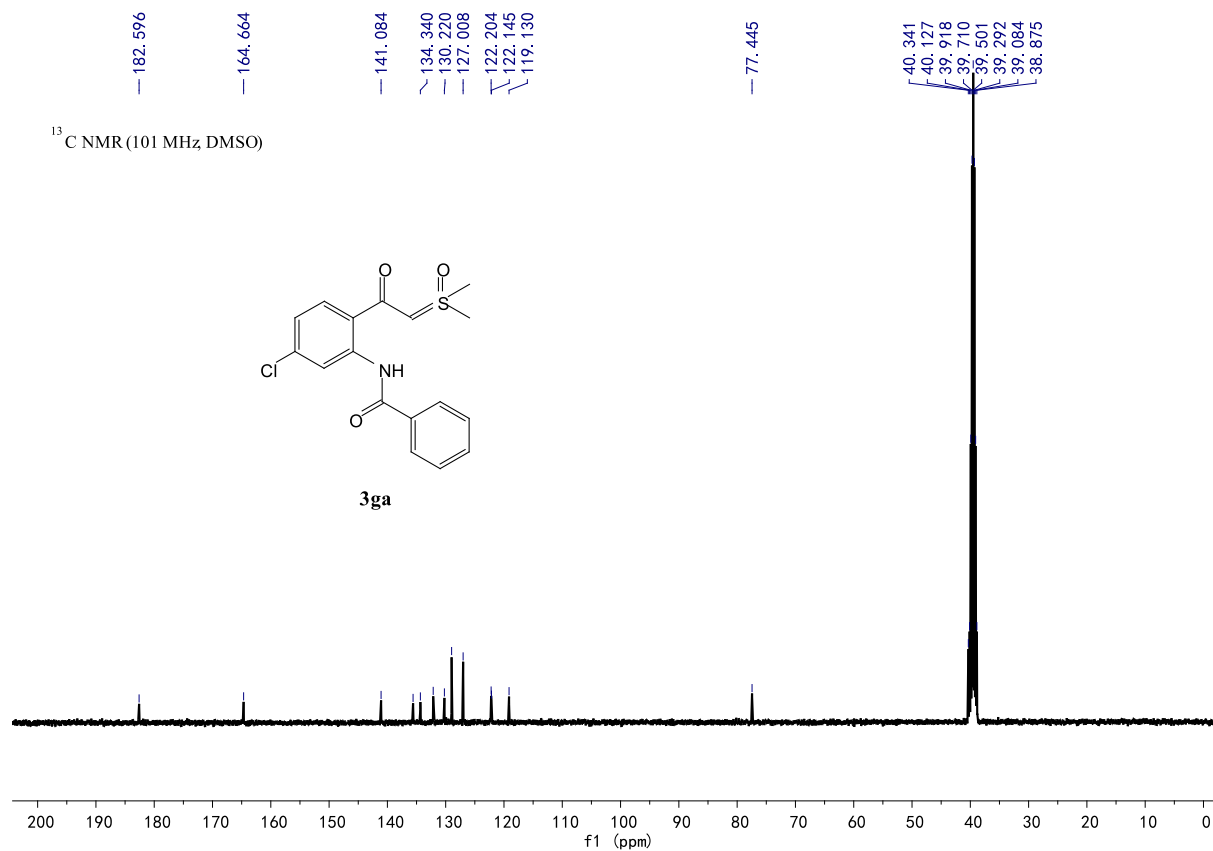

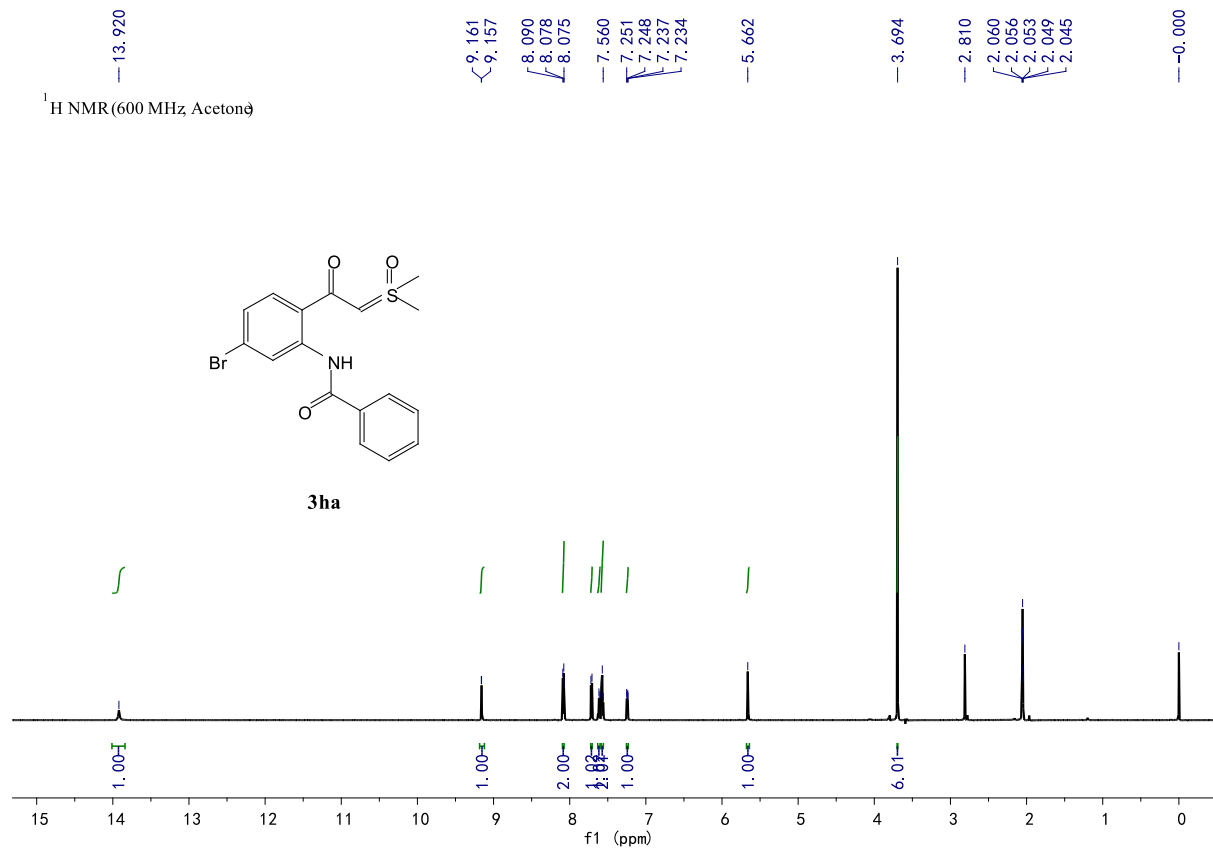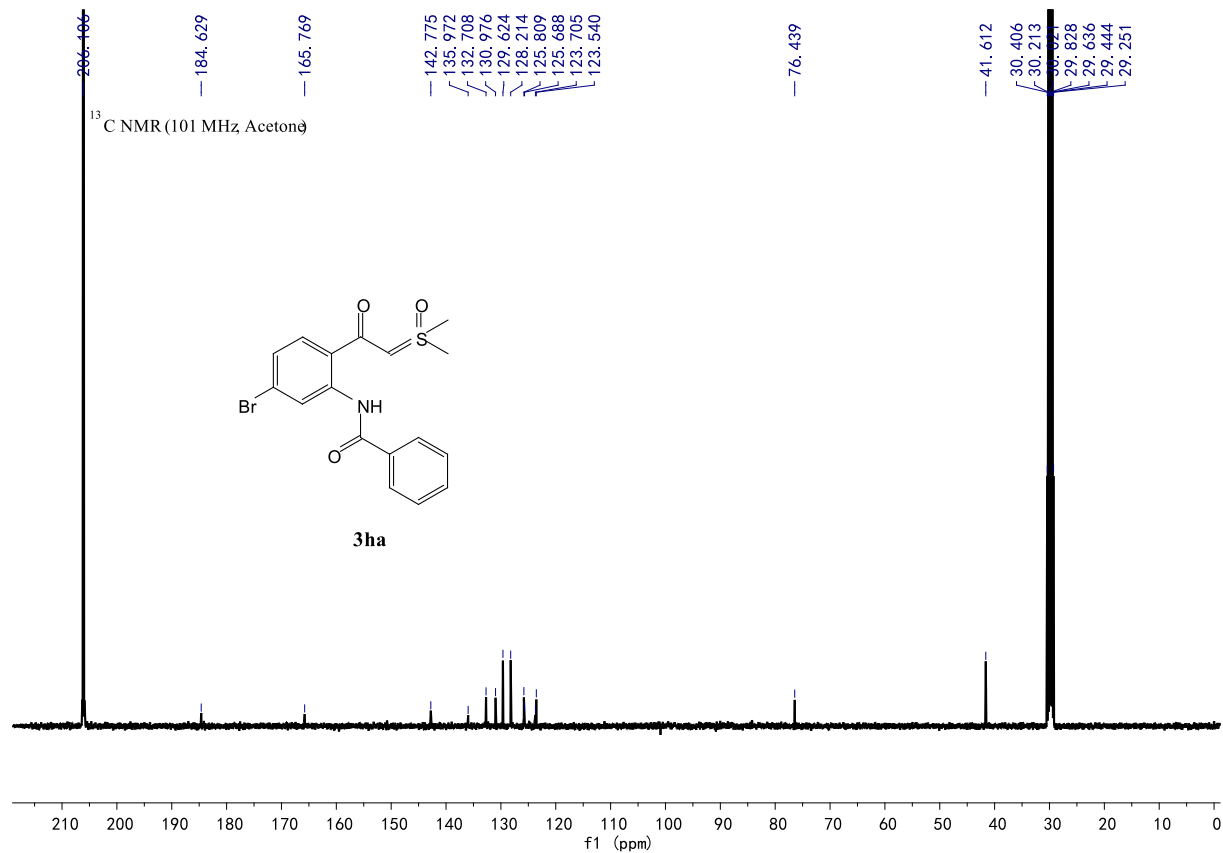

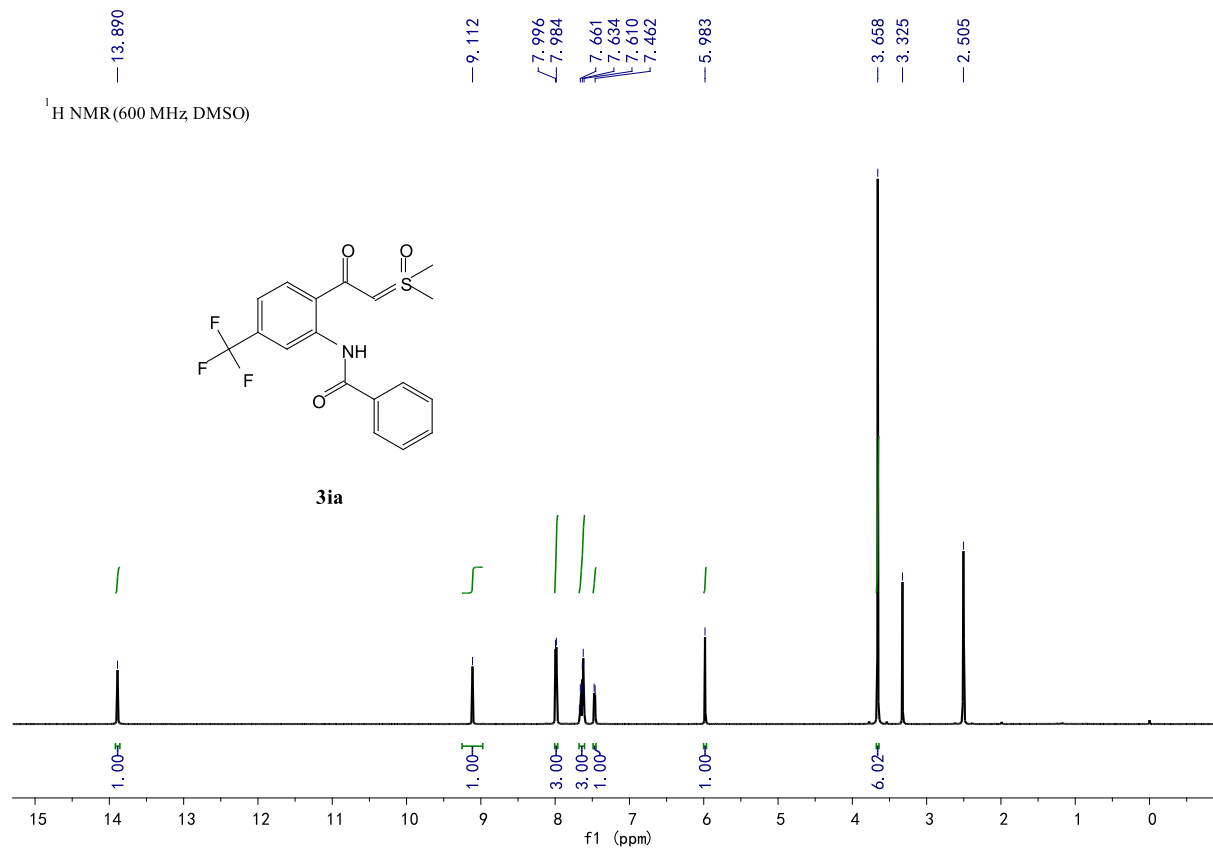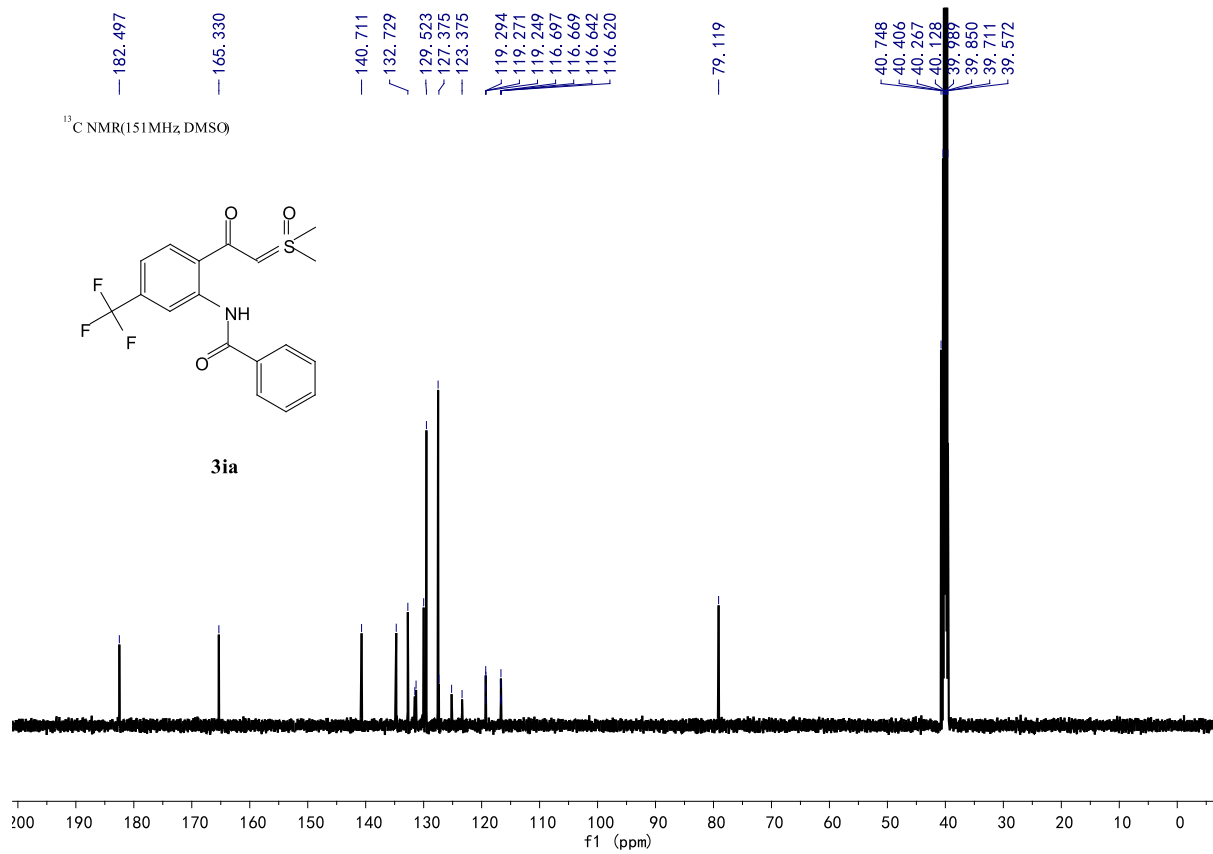

<sup>19</sup>F NMR (565 MHz, DMSO)

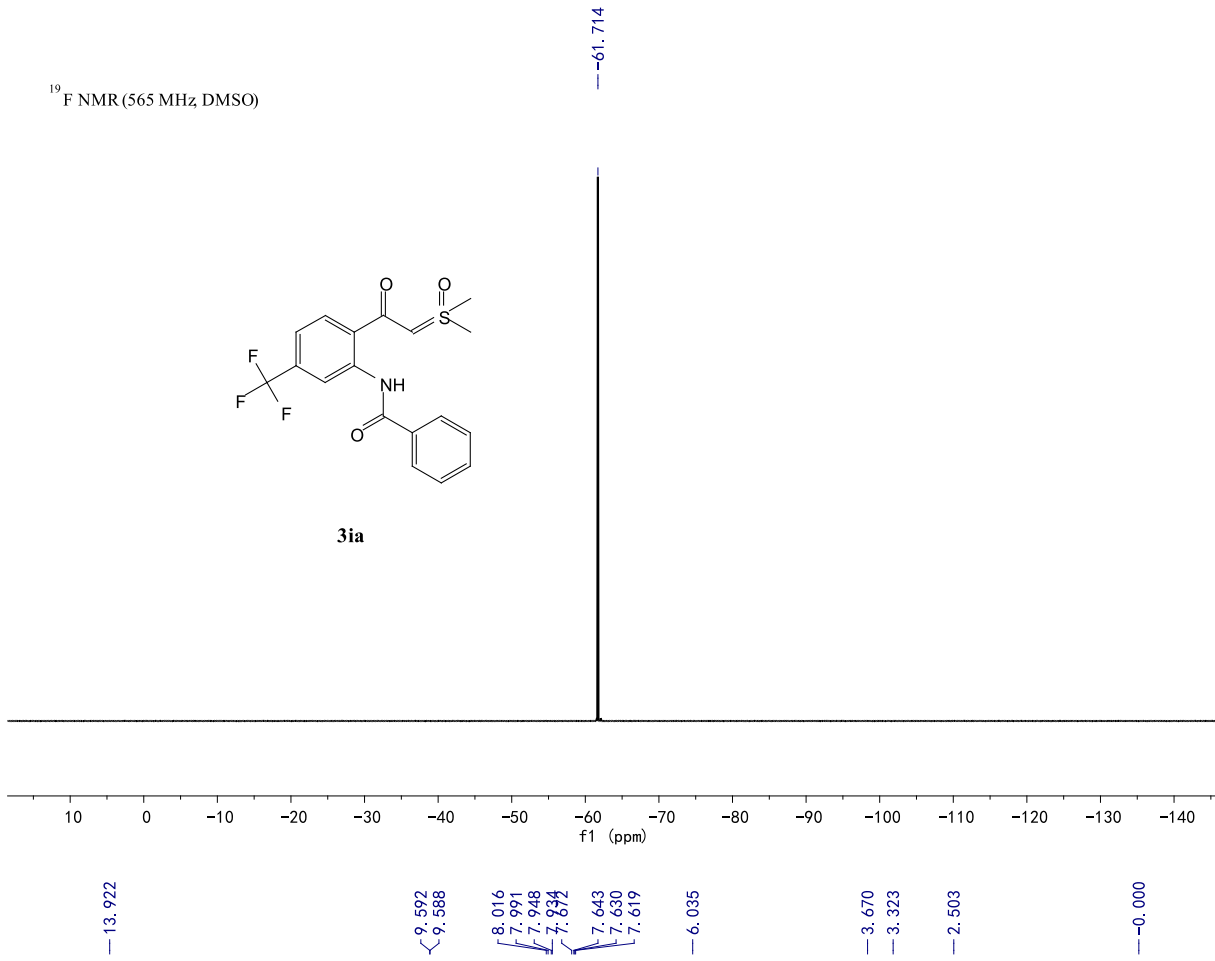

<sup>1</sup>H NMR (600 MHz, DMSO)

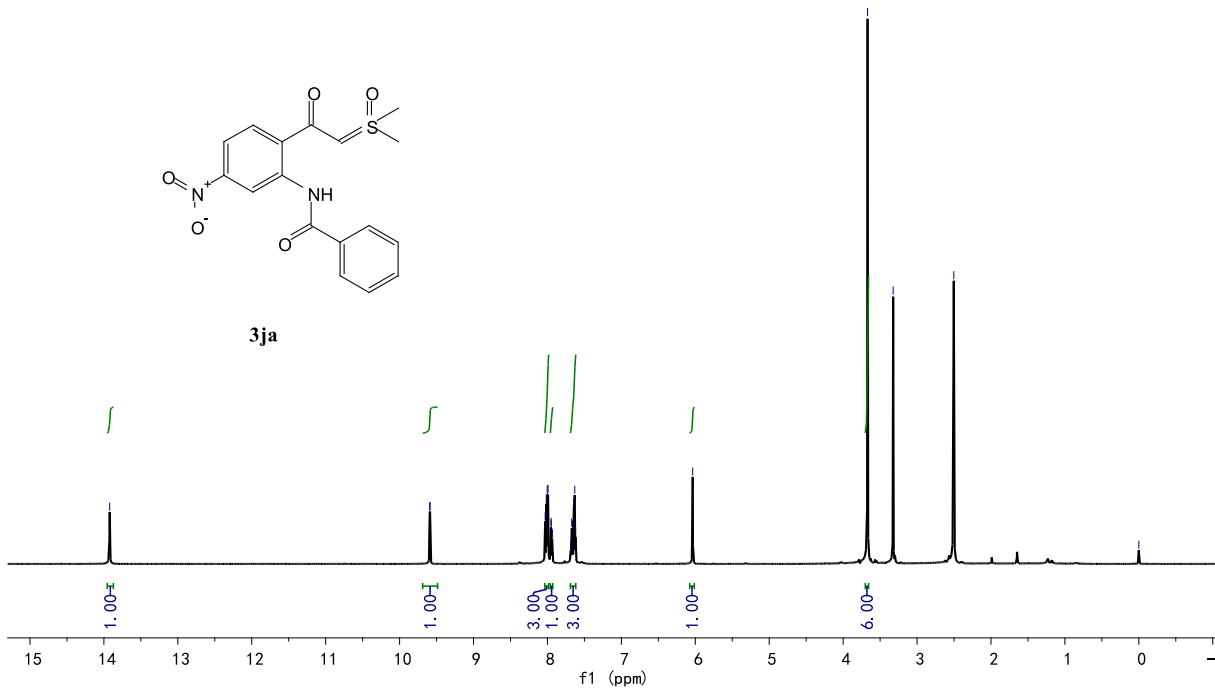



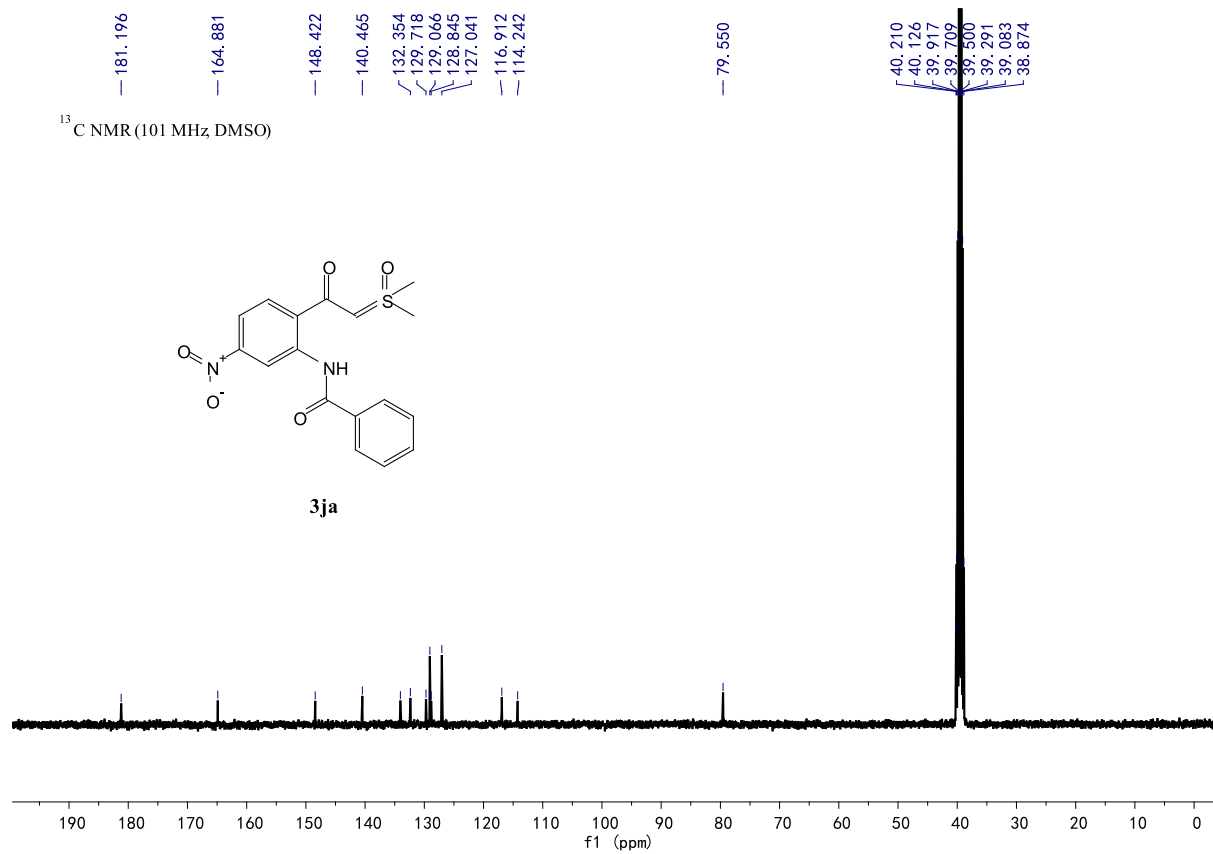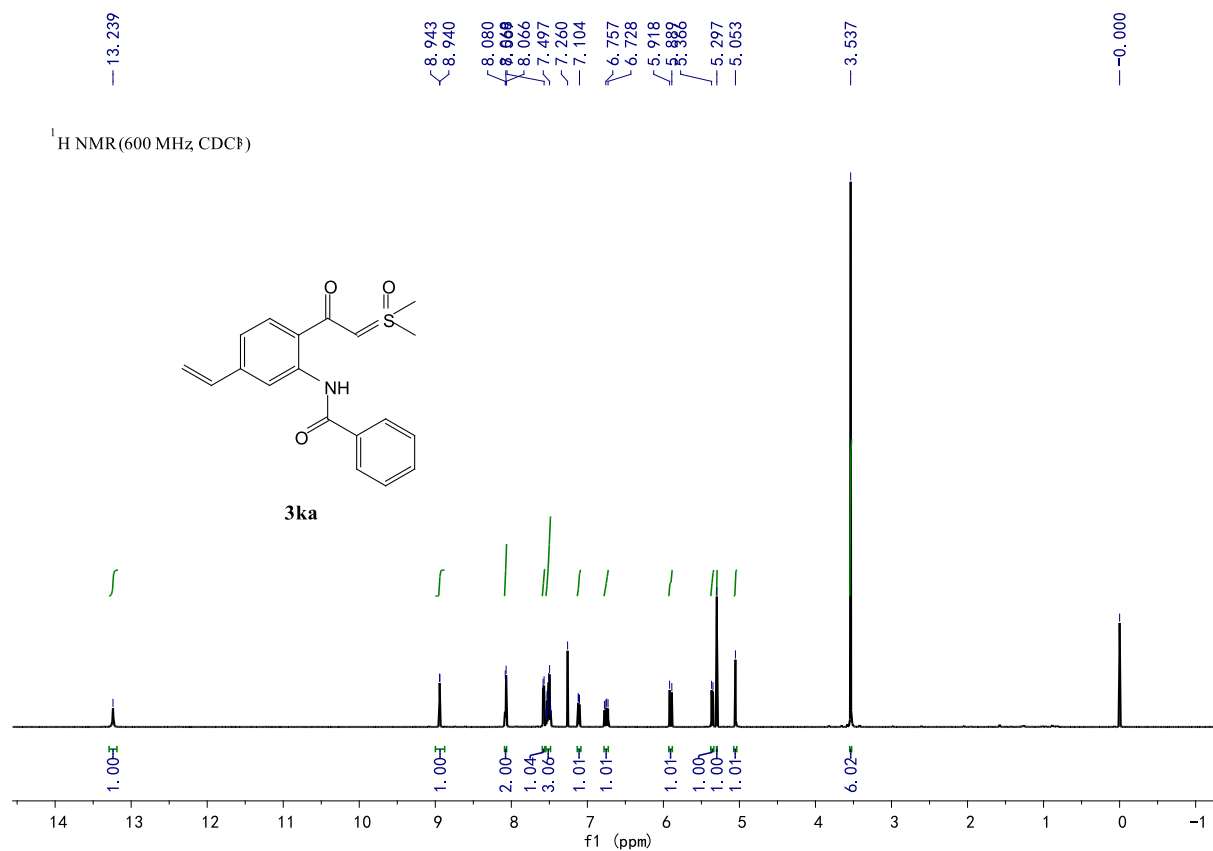

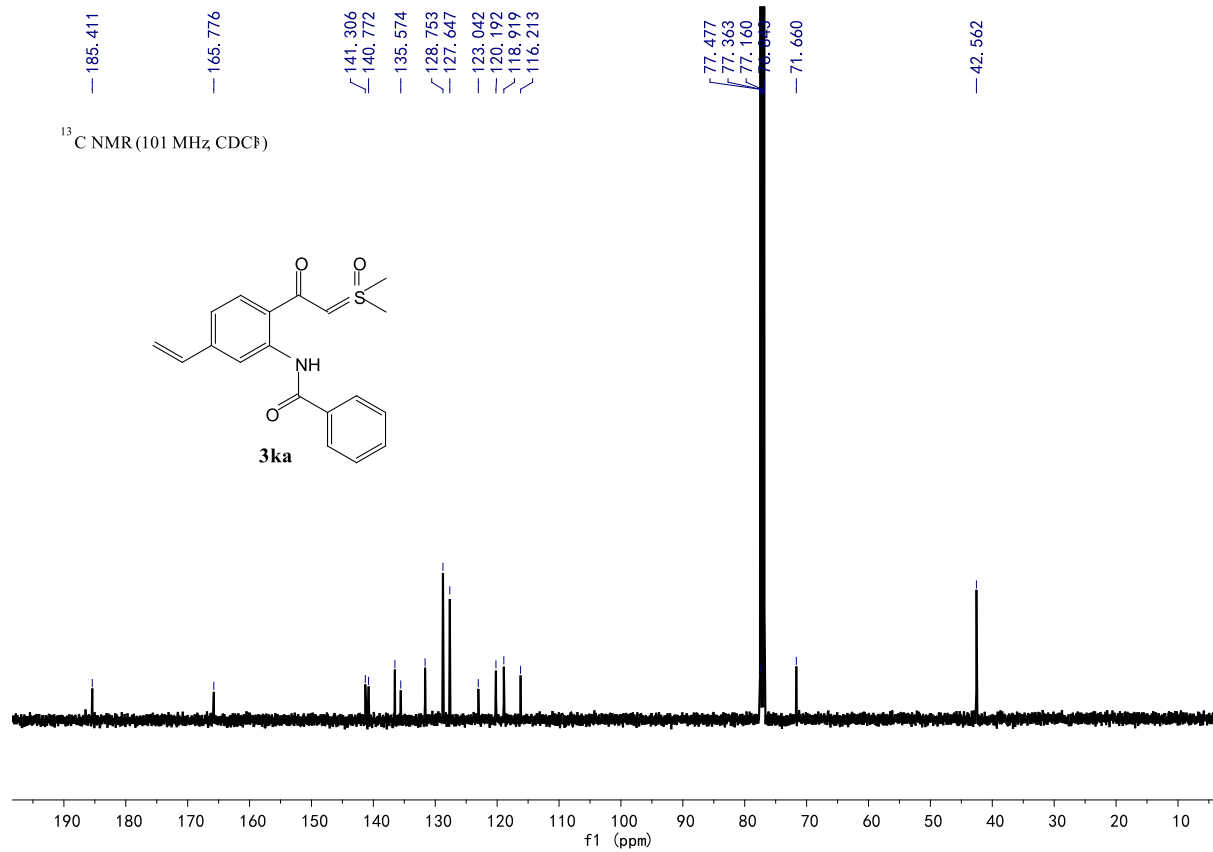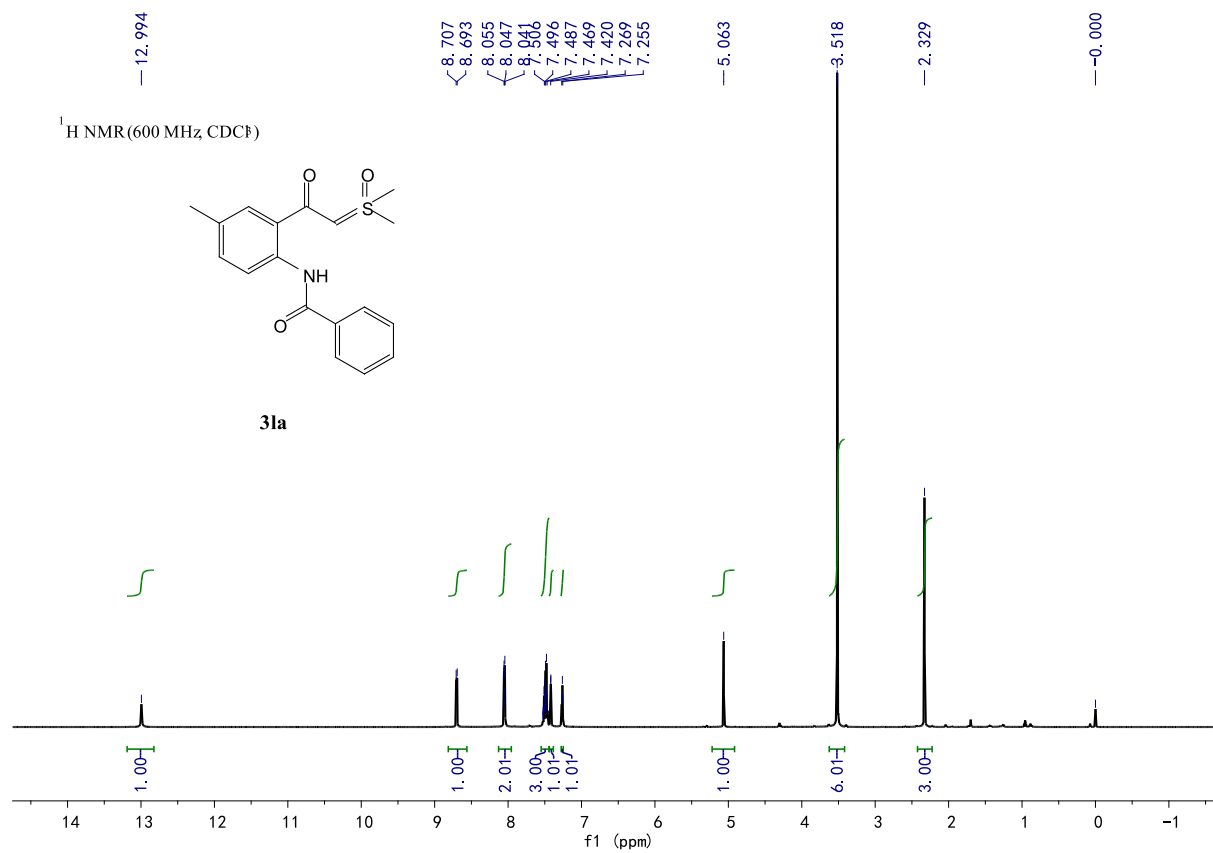

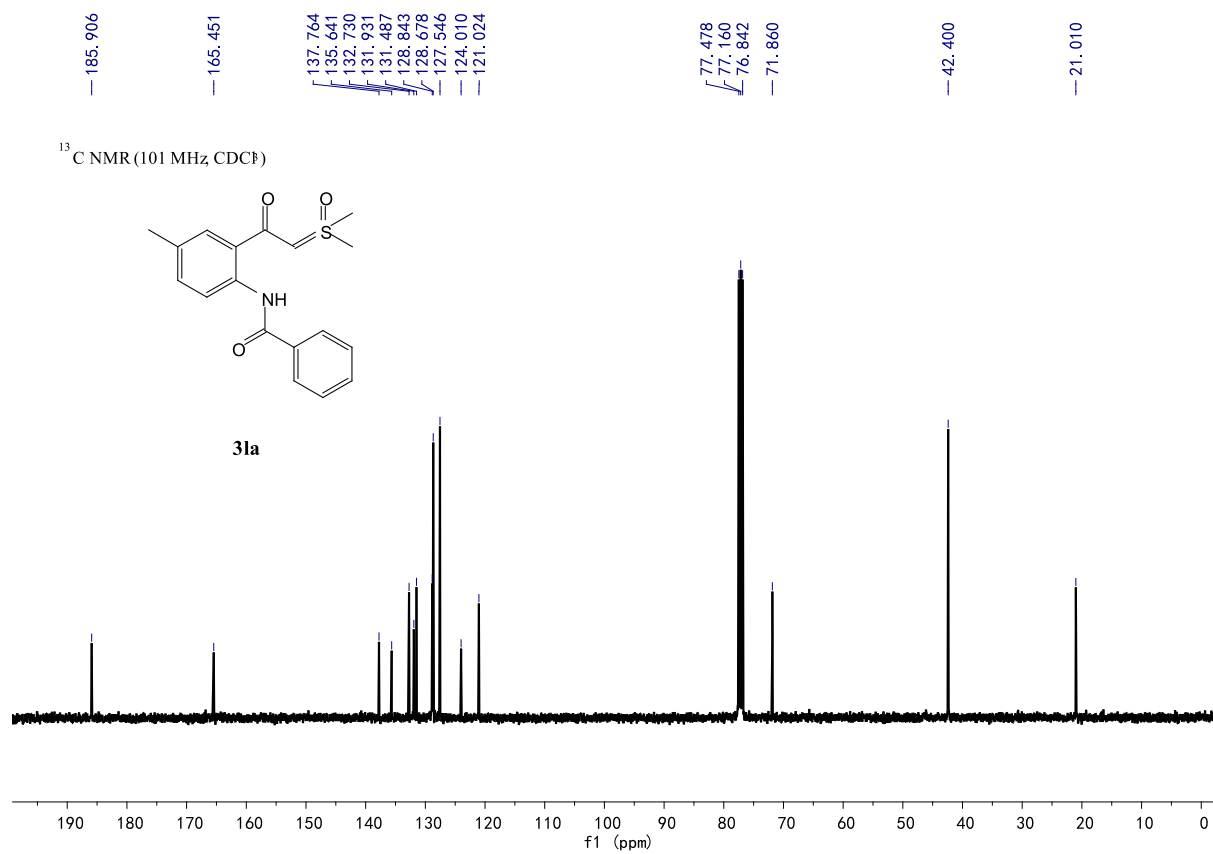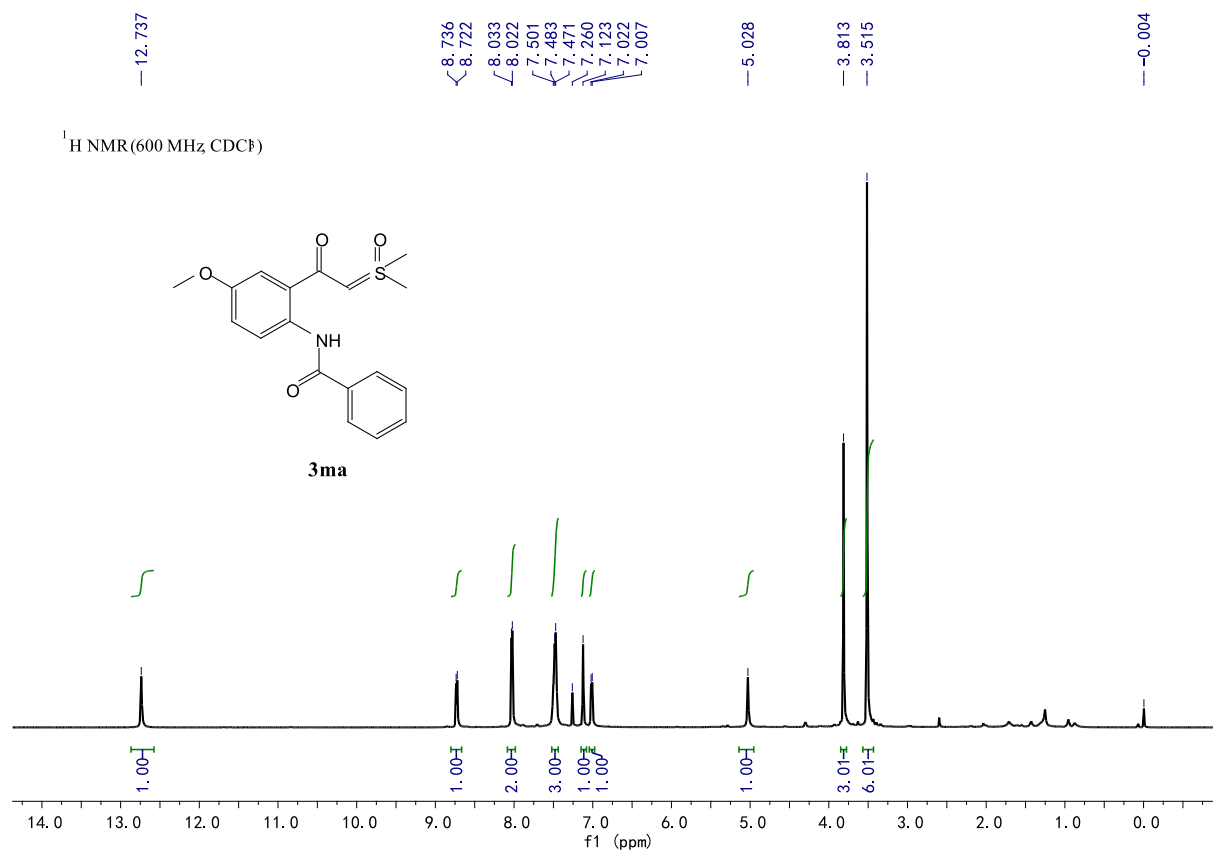

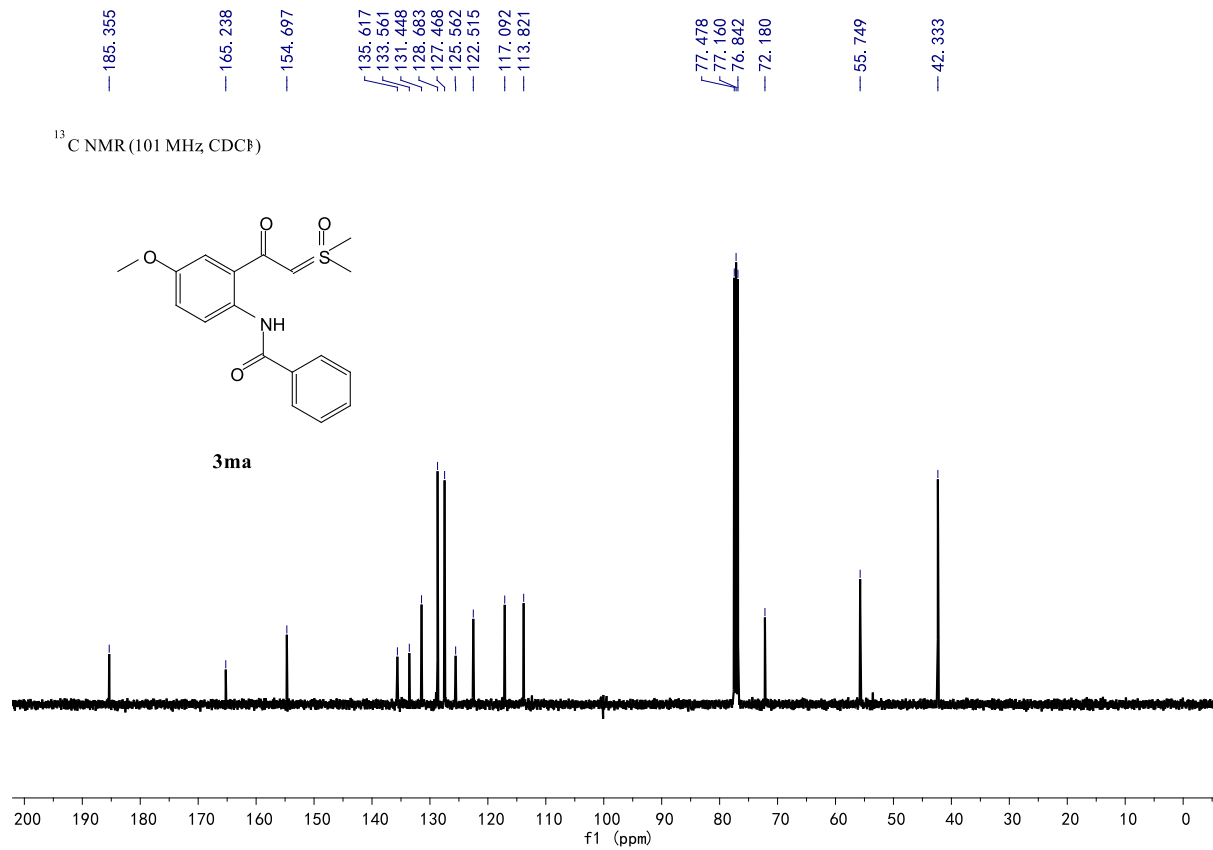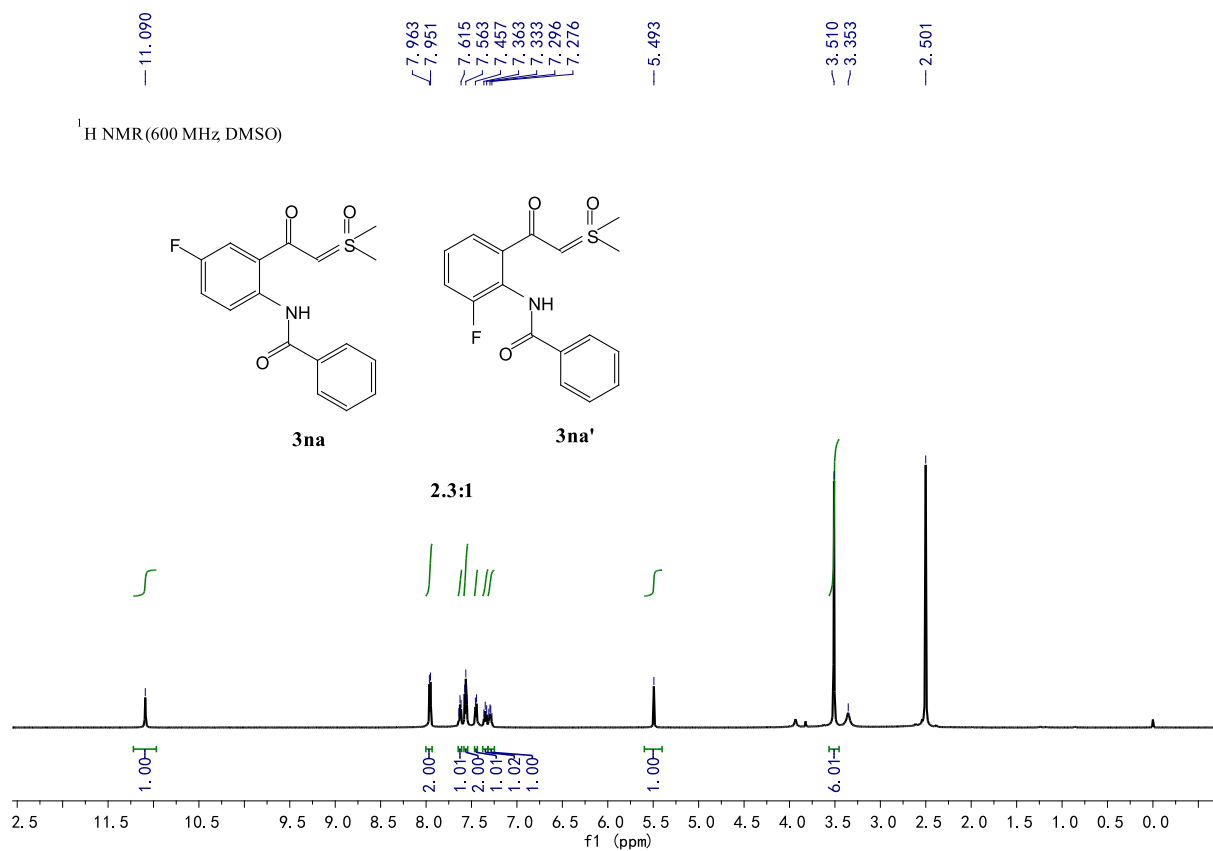

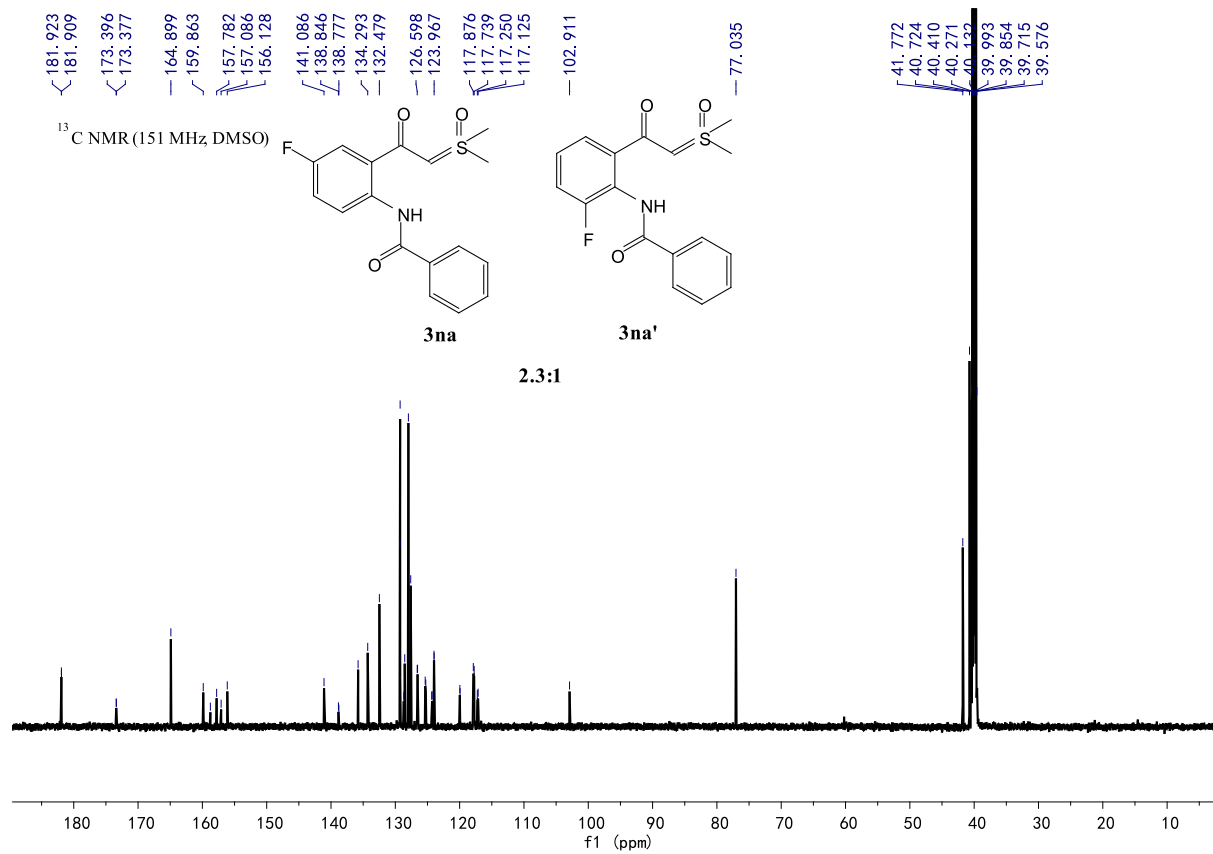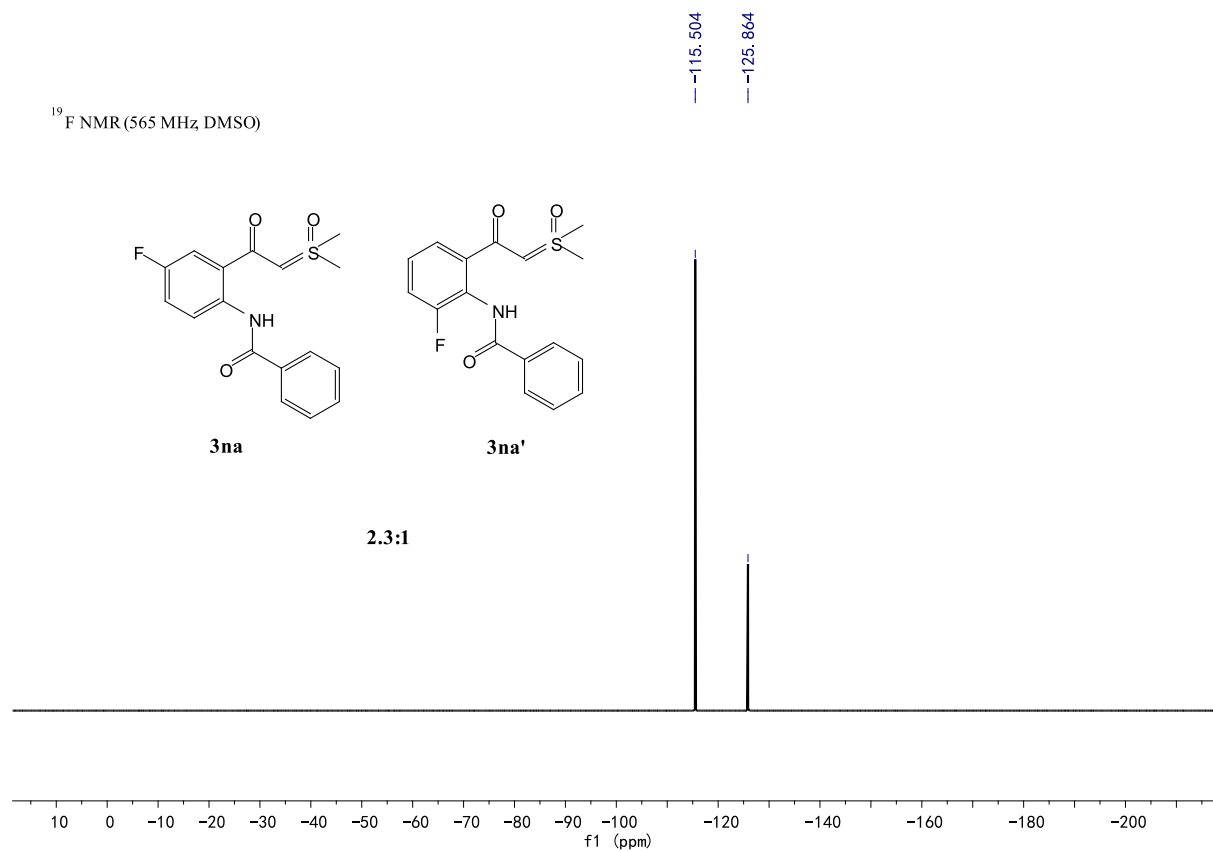

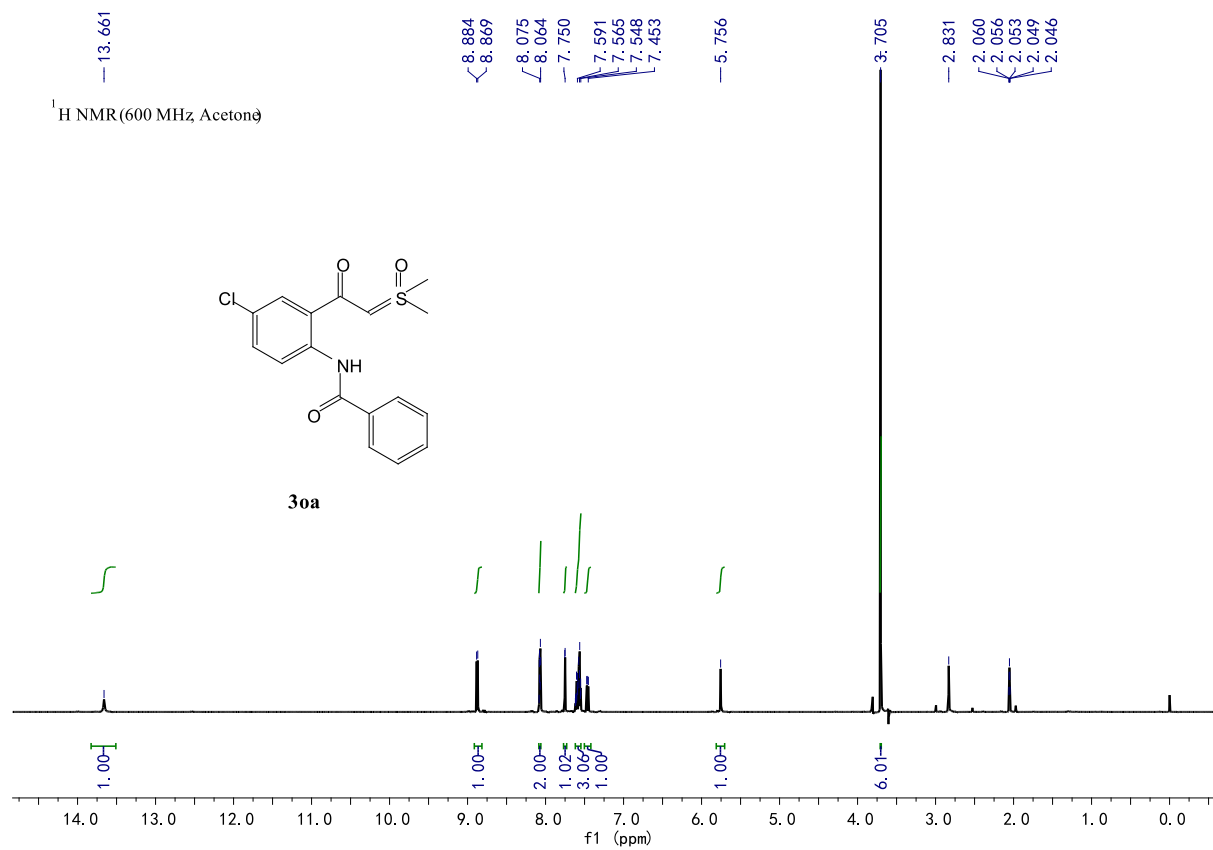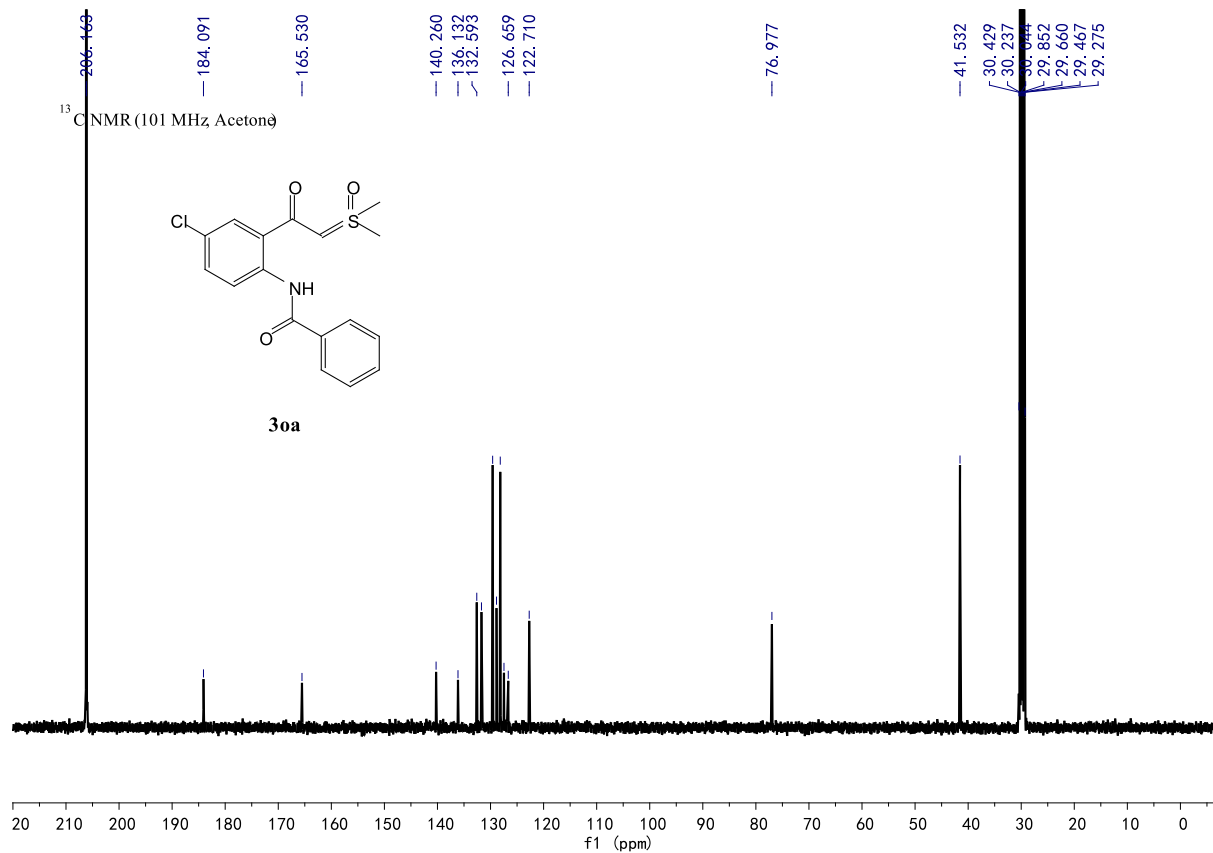

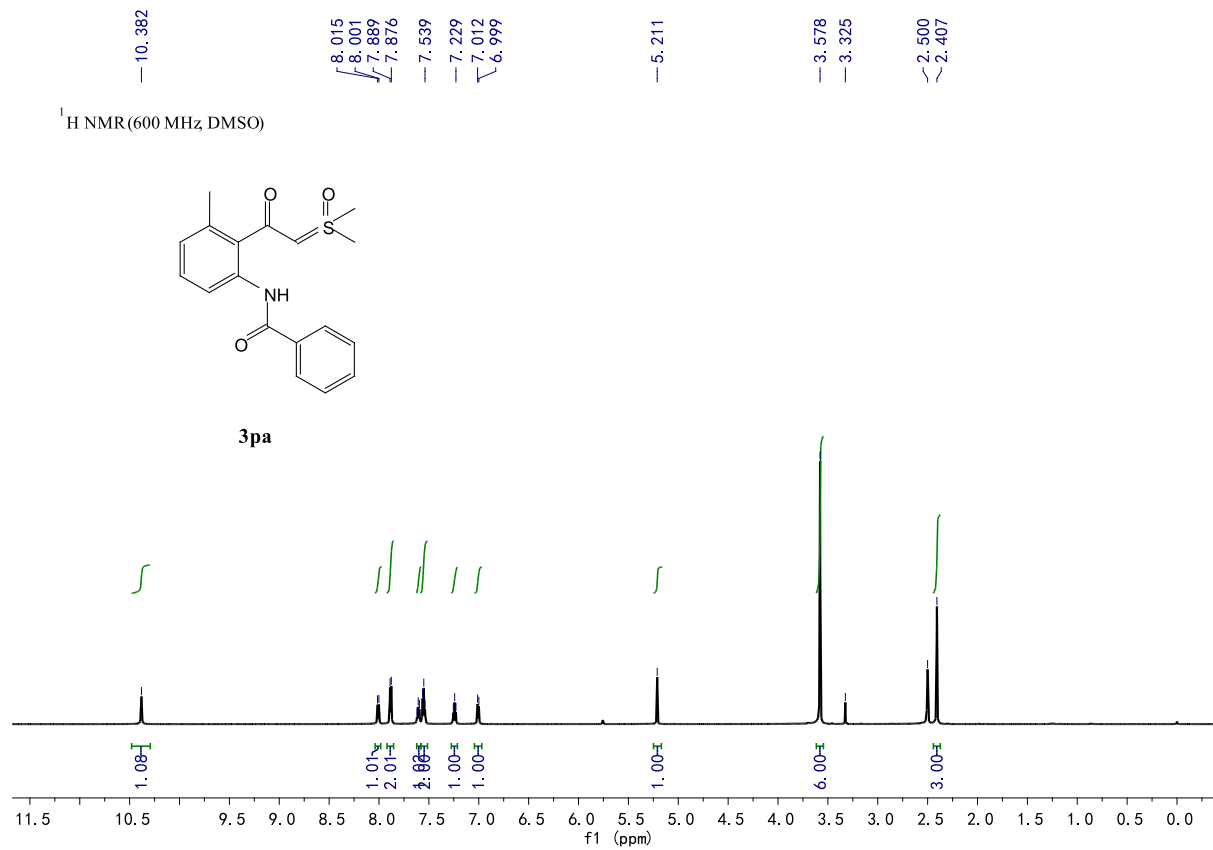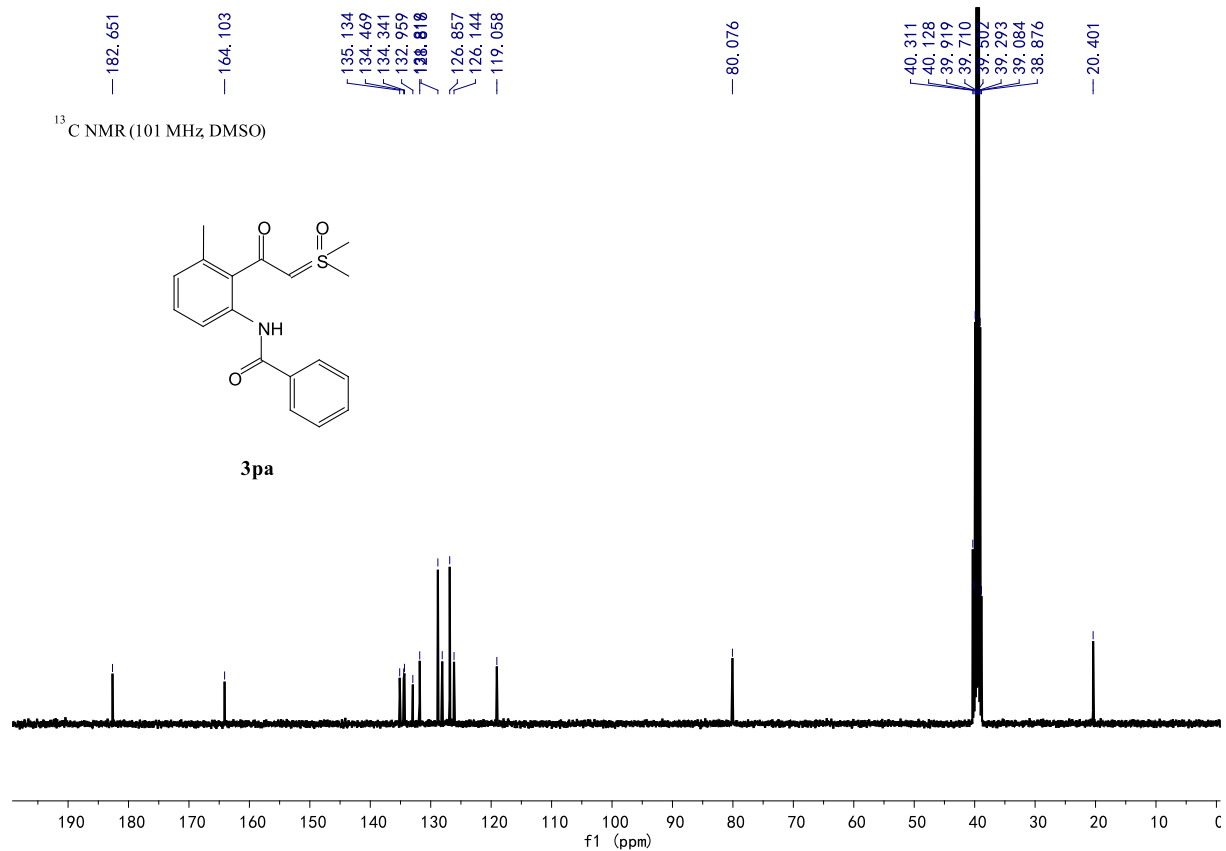

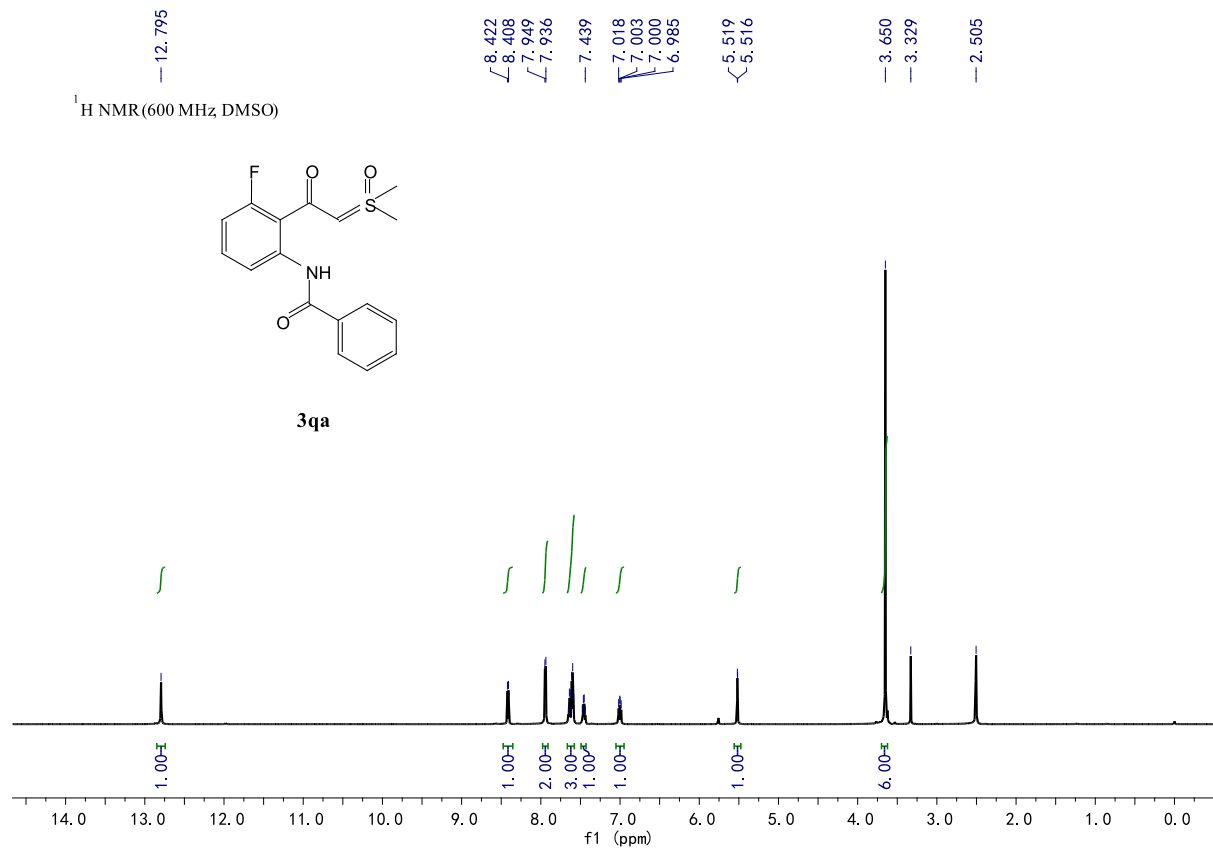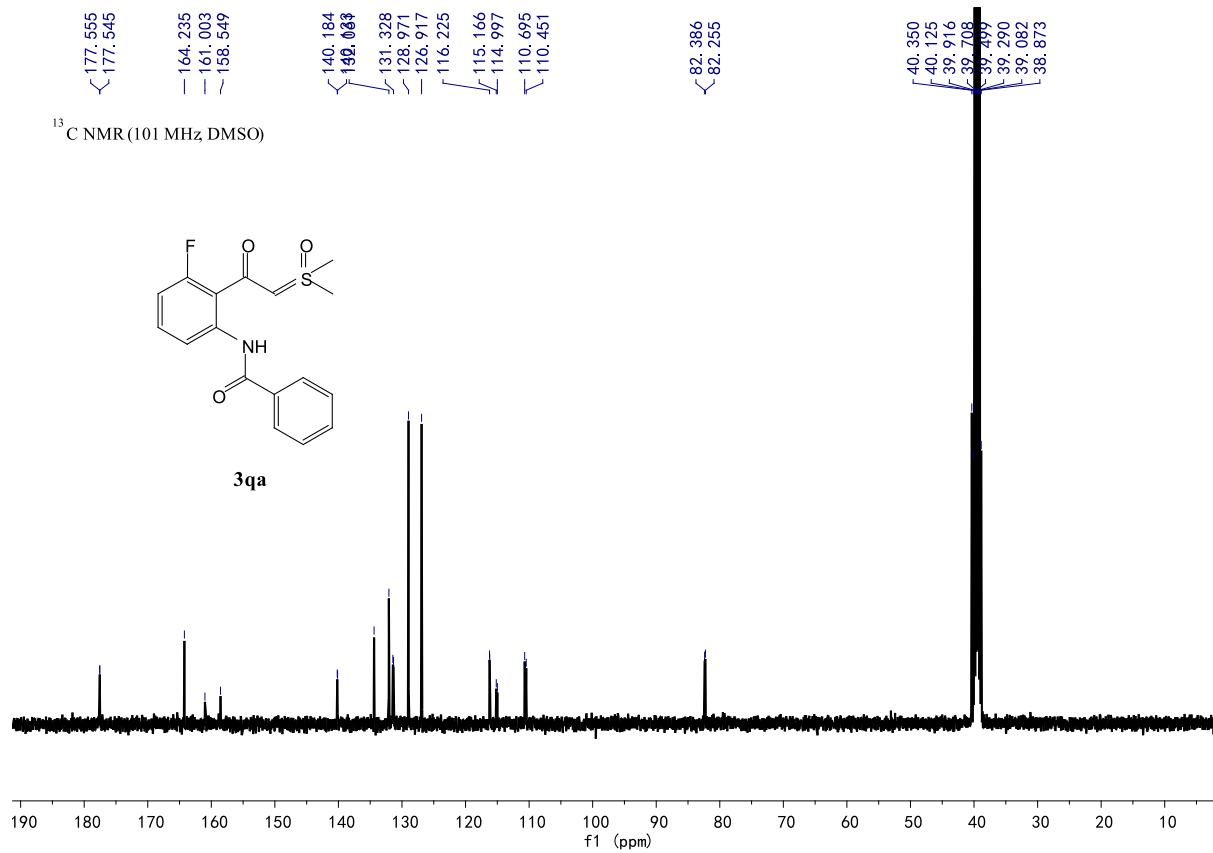



<sup>19</sup>F NMR (565 MHz, DMSO)

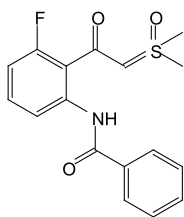

**3qa**

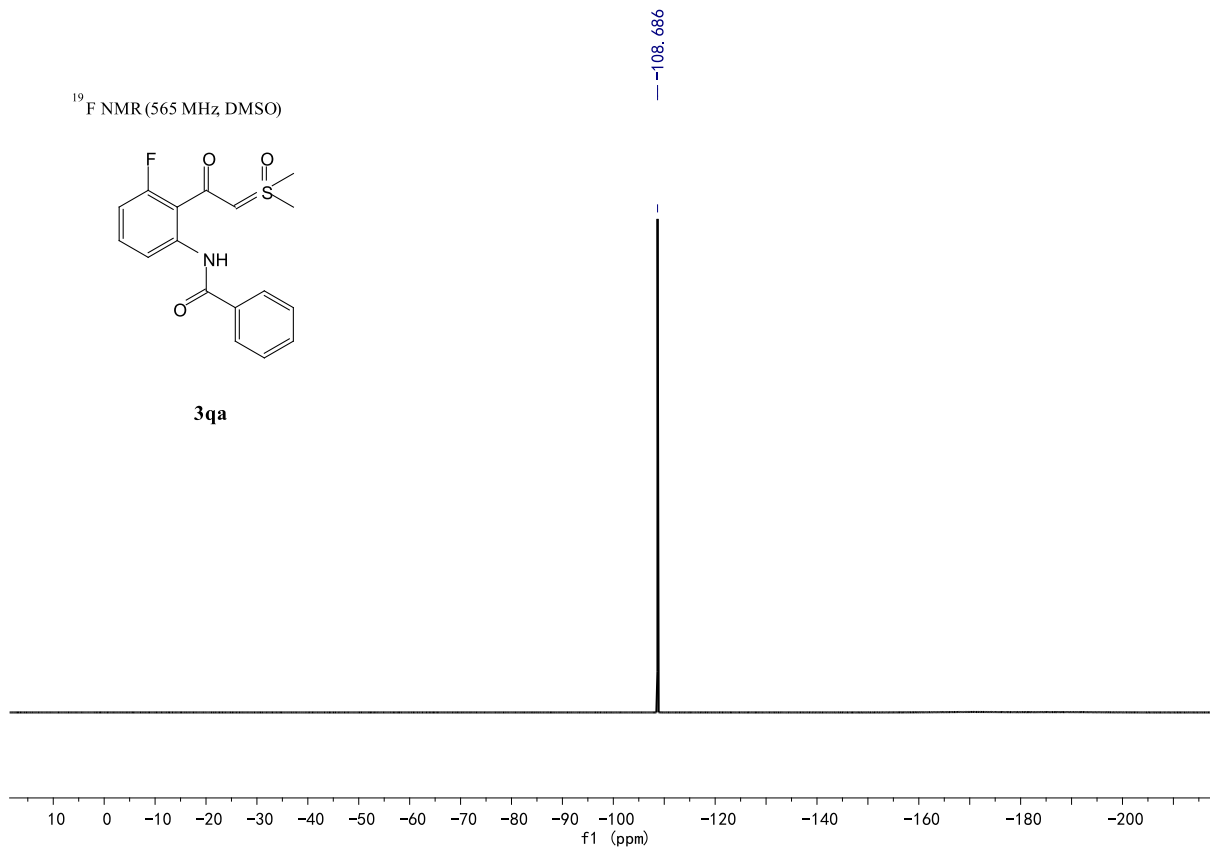

10.383

8.137

8.124

7.880

7.575

7.562

7.550

7.392

7.379

7.365

7.267

7.254

5.290

3.589

3.329

2.504

2.502

2.499

<sup>1</sup>H NMR (600 MHz, DMSO)

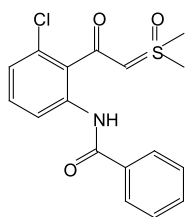

**3ra**

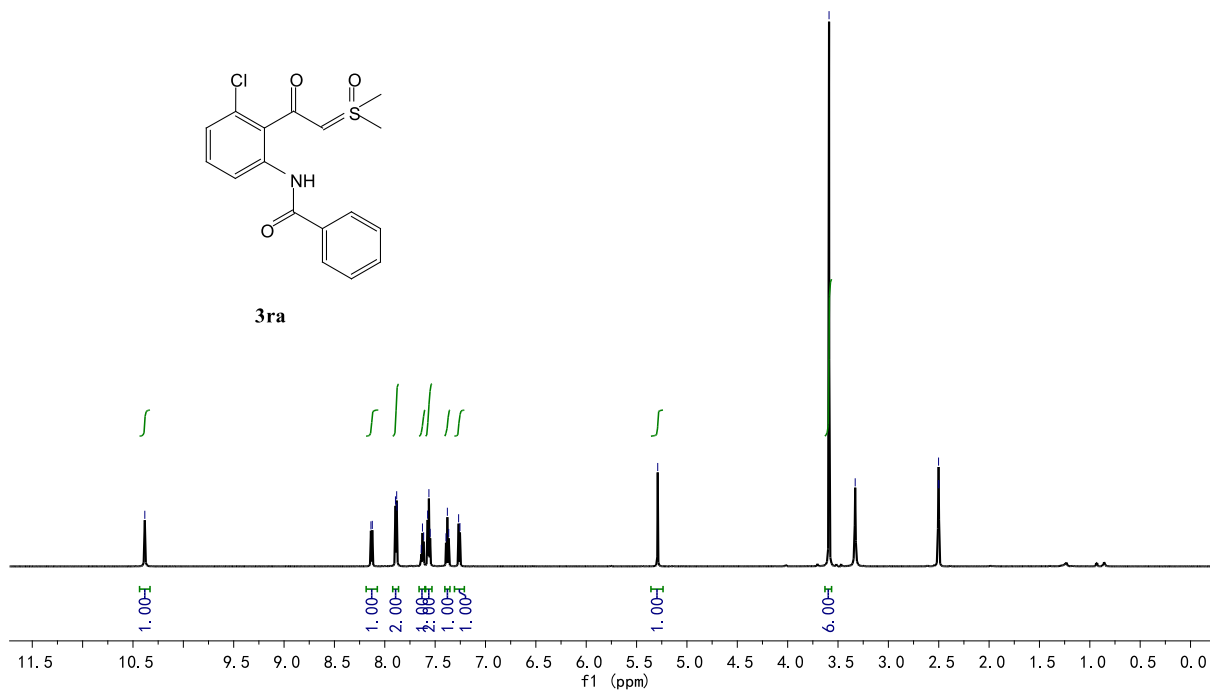

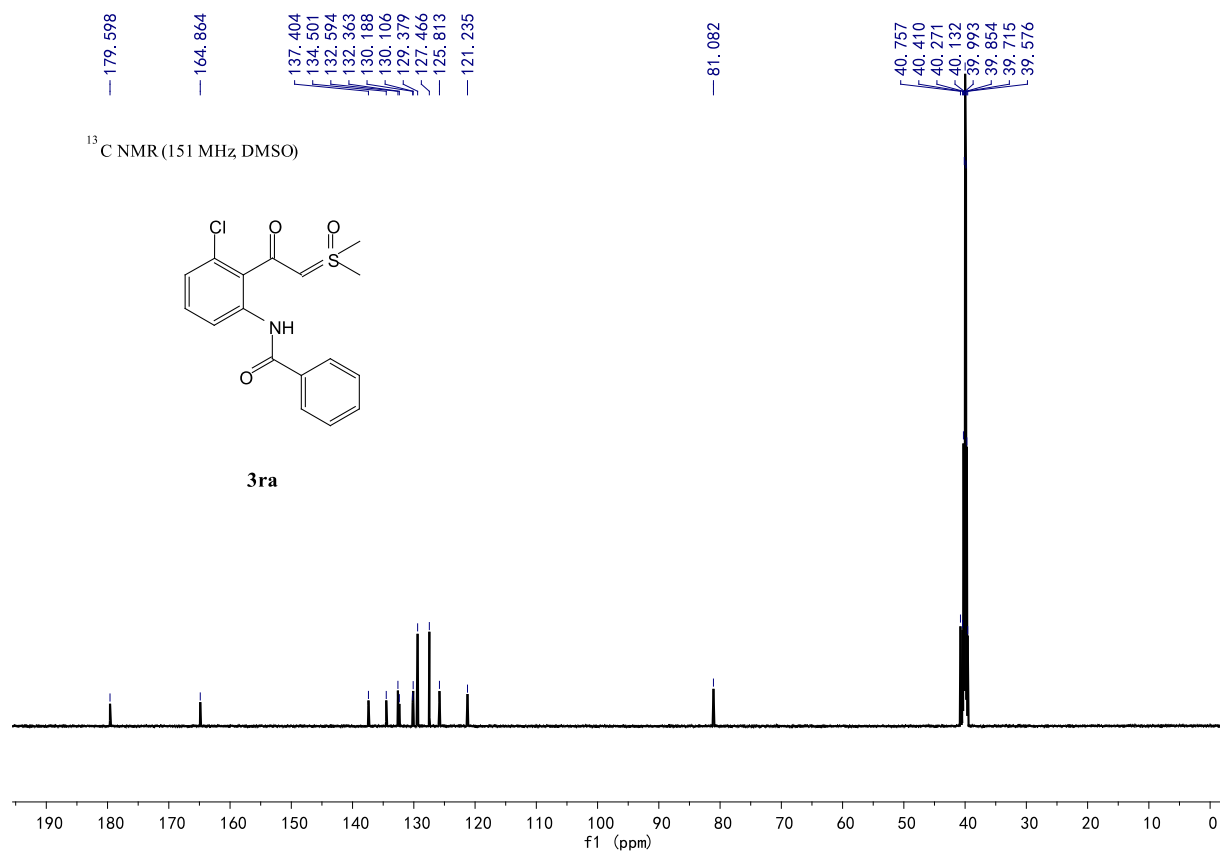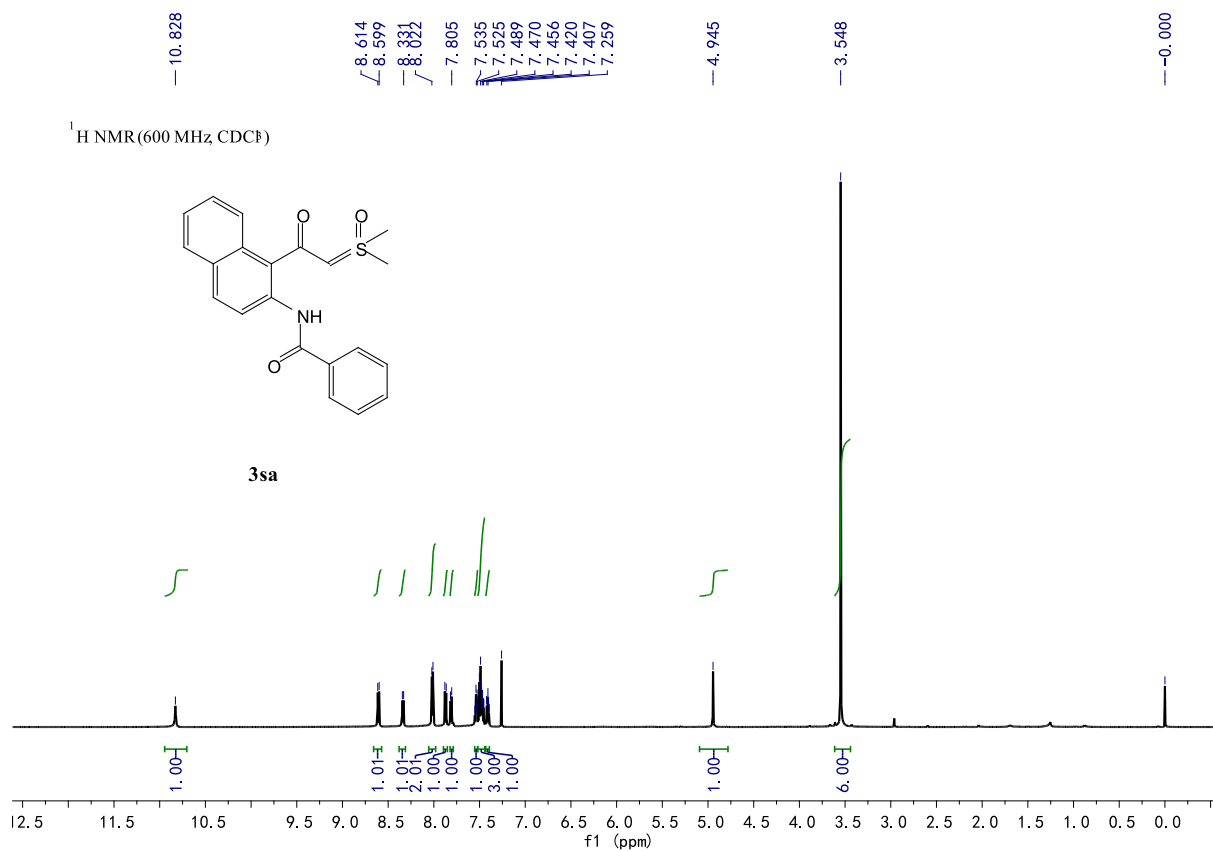

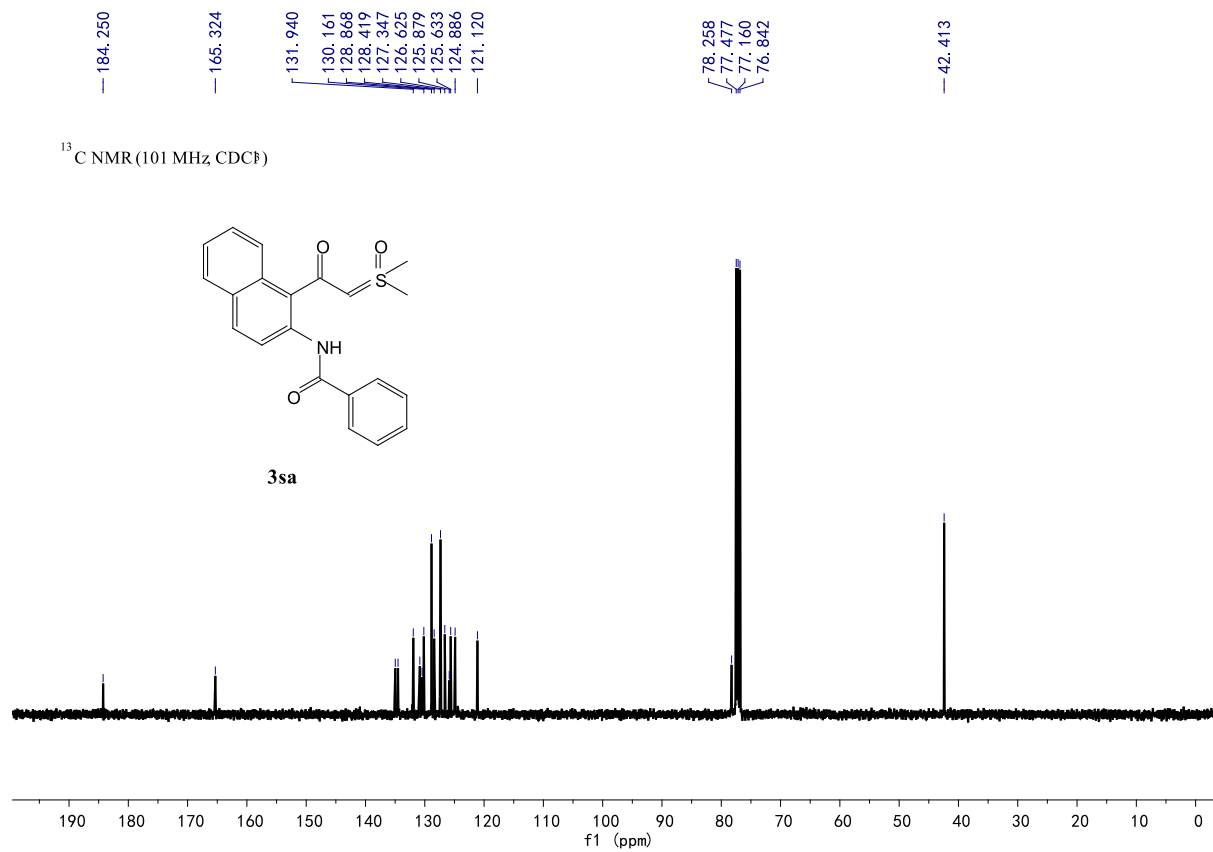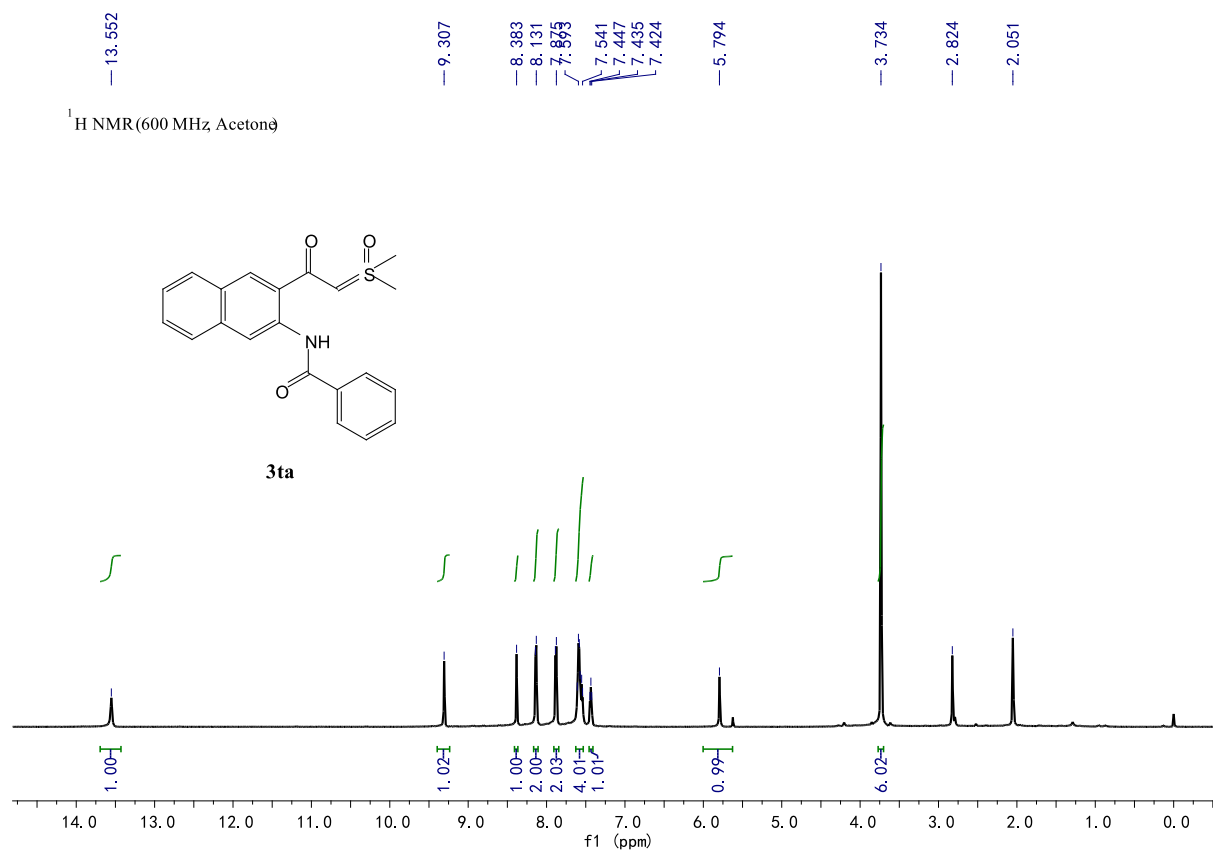

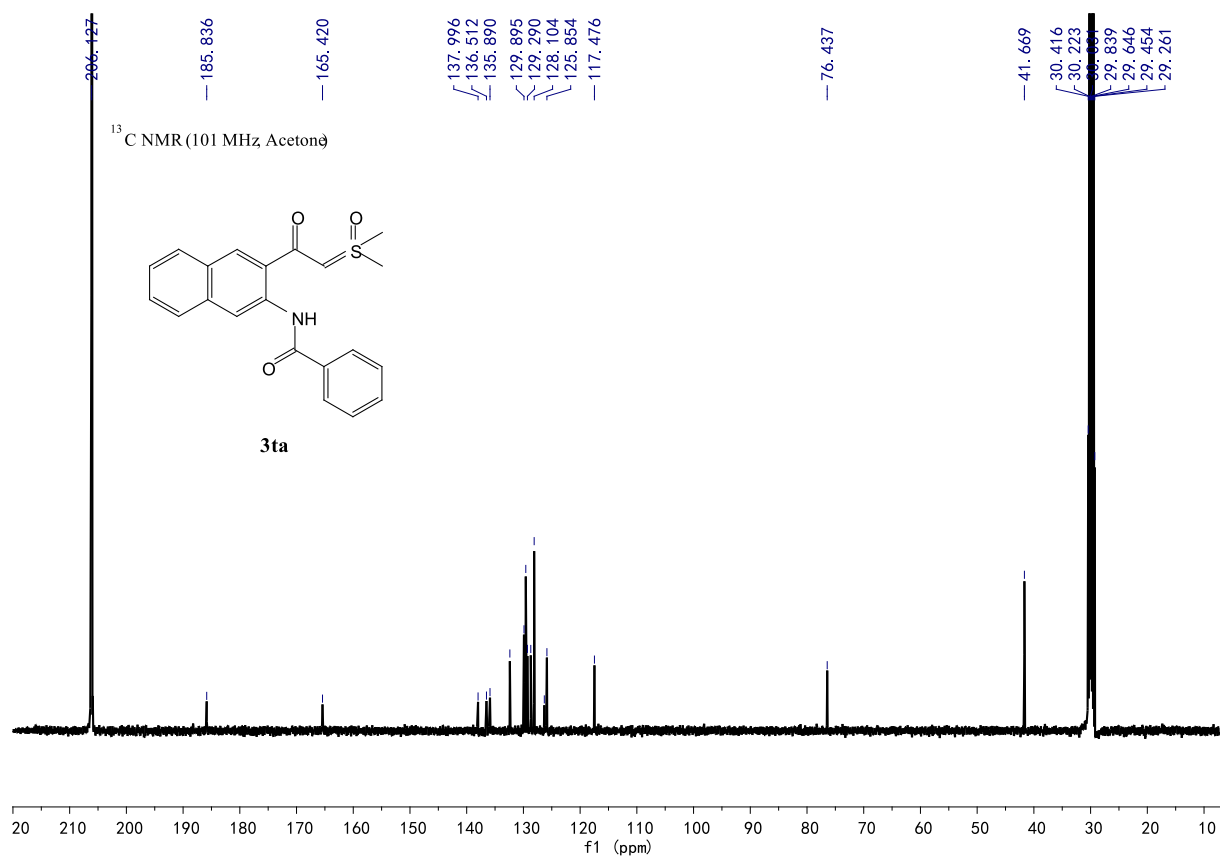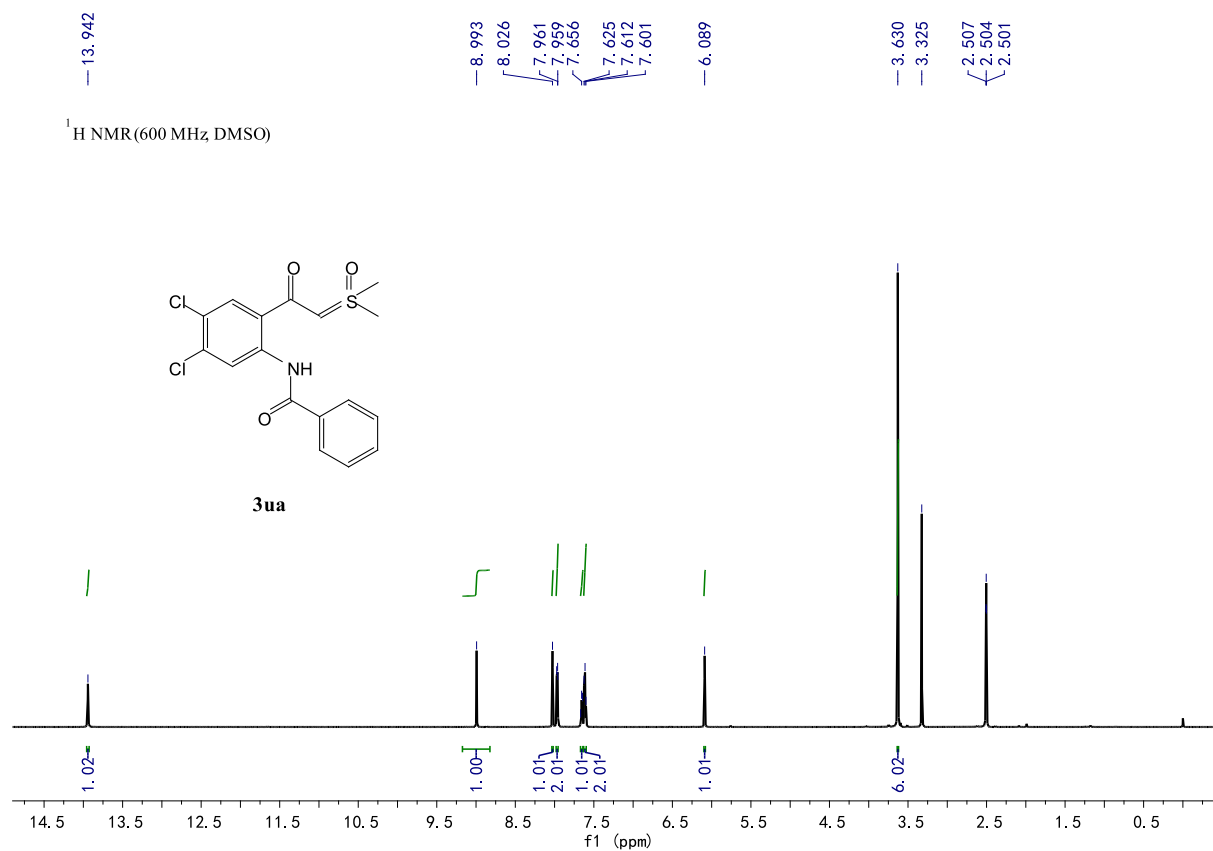

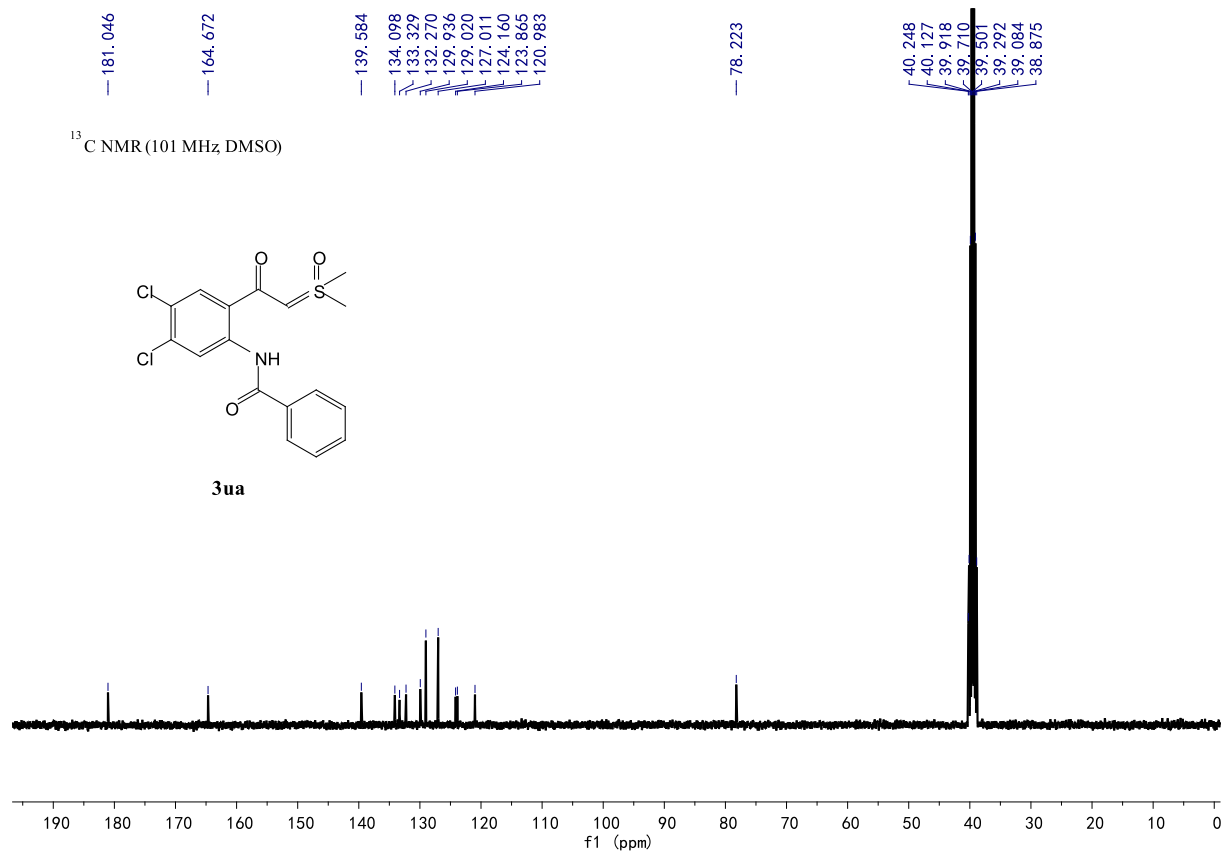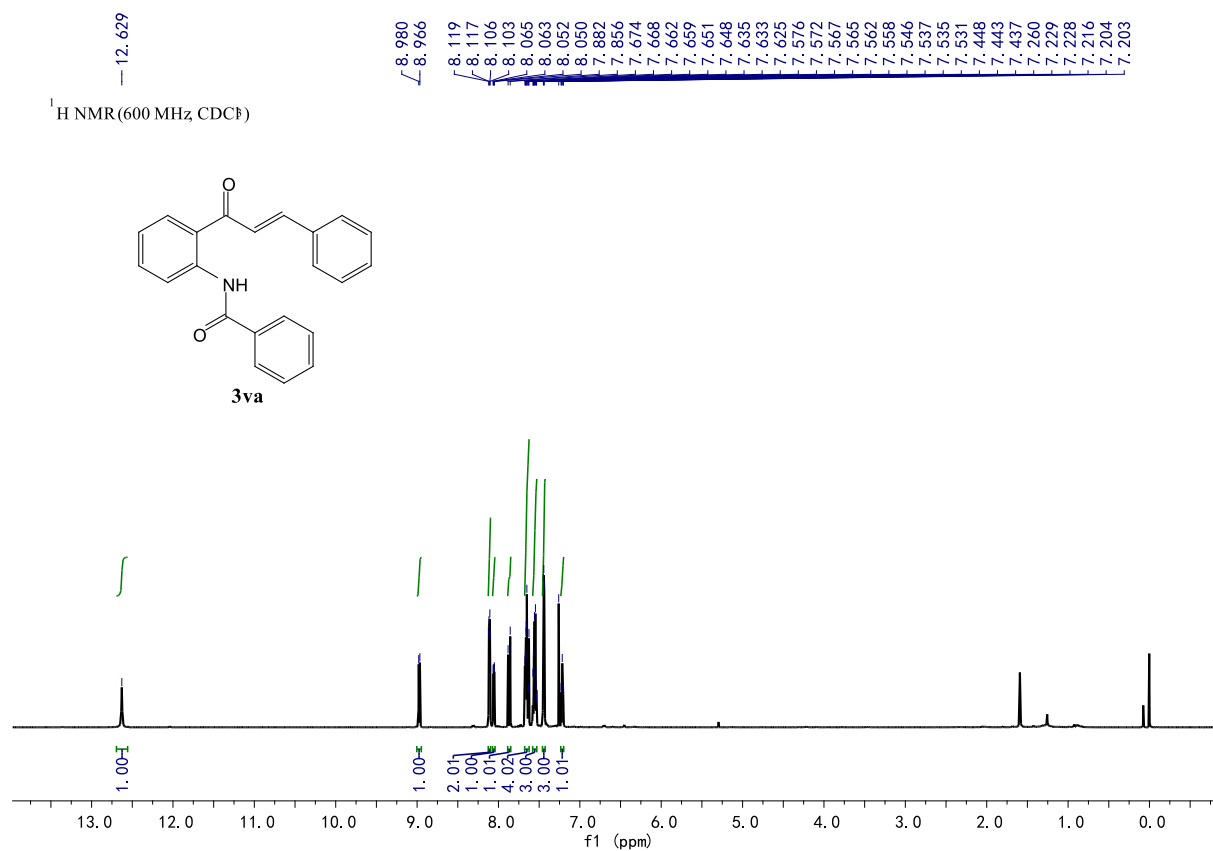

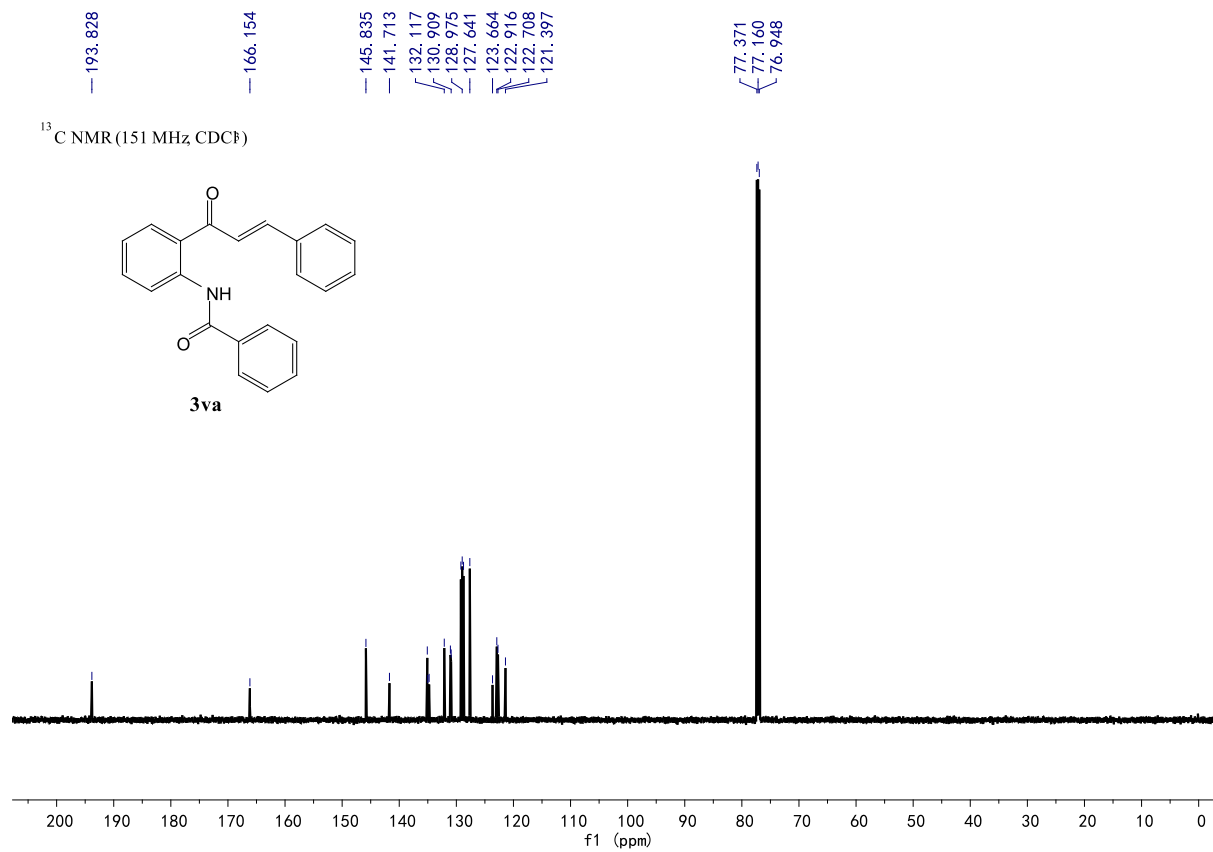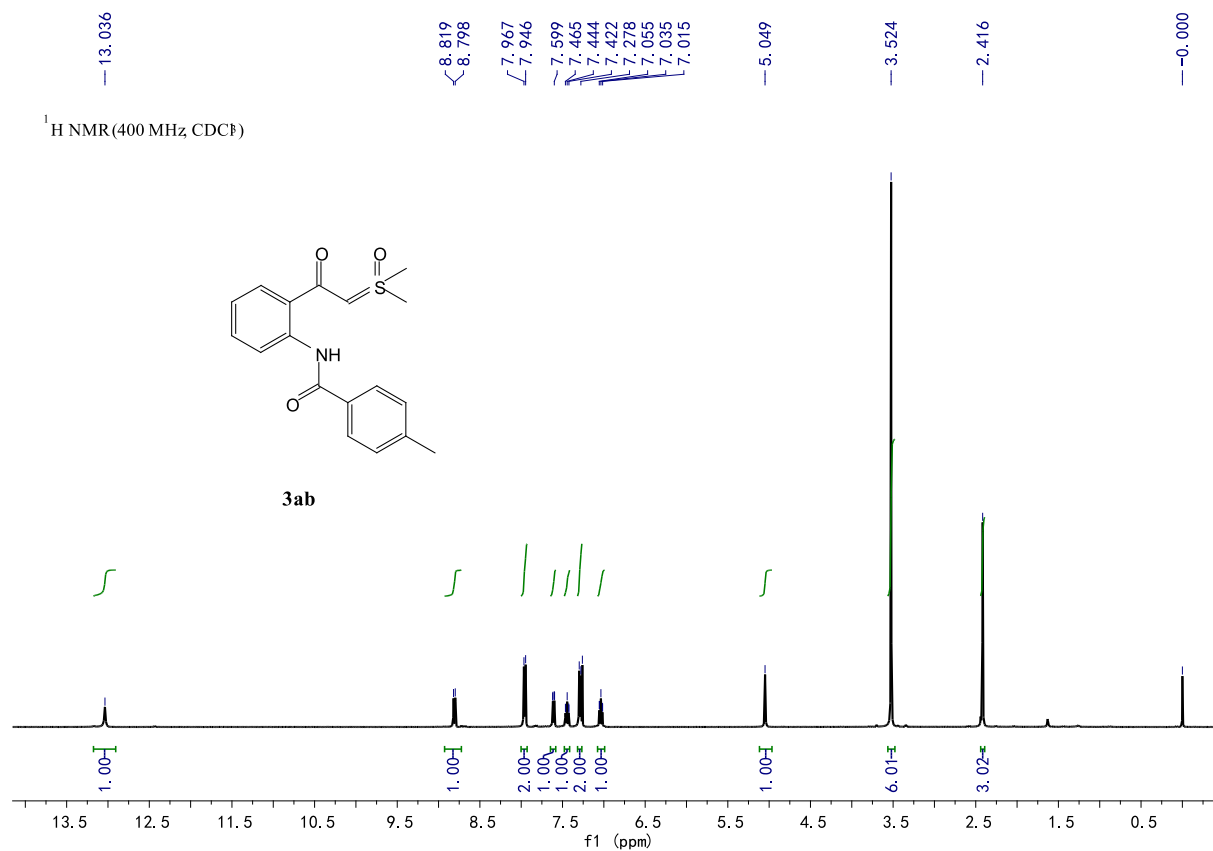

<sup>13</sup>C NMR (151 MHz, CDCl<sub>3</sub>)

185.825  
165.688  
142.017  
140.304  
129.401  
128.438  
127.599  
124.006  
122.413  
121.054  
77.371  
77.160  
76.948  
72.046  
42.331  
21.598

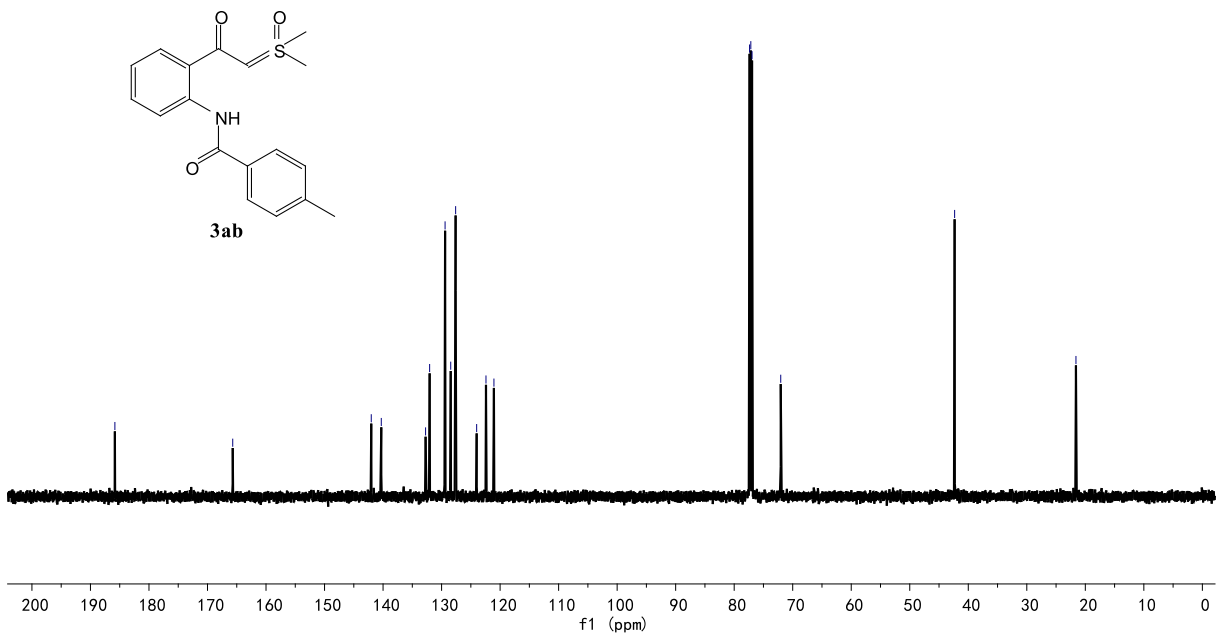

<sup>1</sup>H NMR (600 MHz, CDCl<sub>3</sub>)

13.117  
8.822  
8.809  
8.001  
7.987  
7.493  
7.260  
7.014  
7.002  
6.989  
5.086  
3.485  
1.342

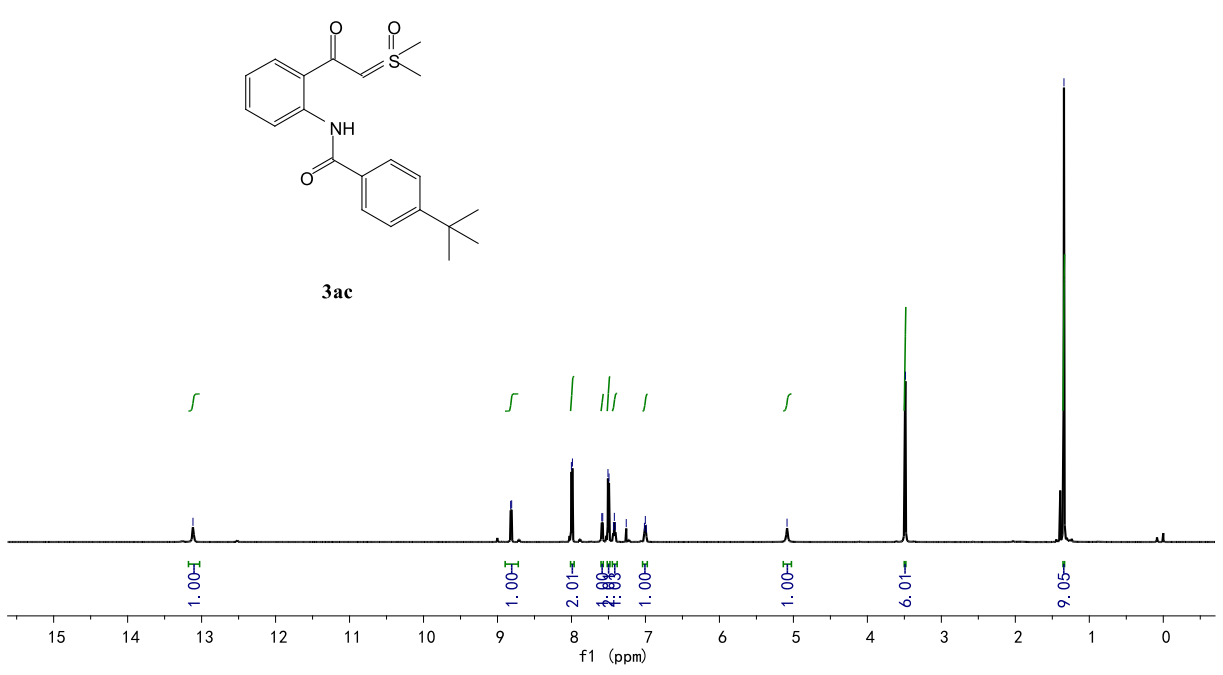

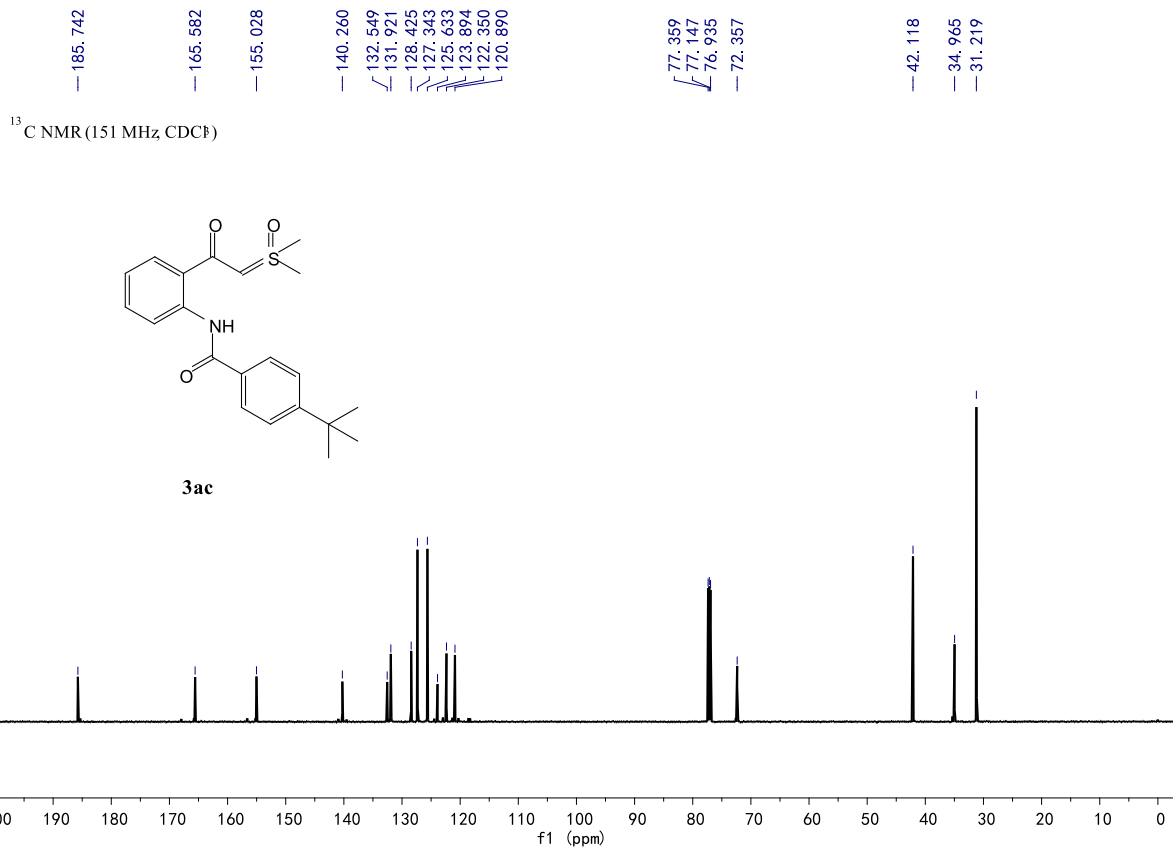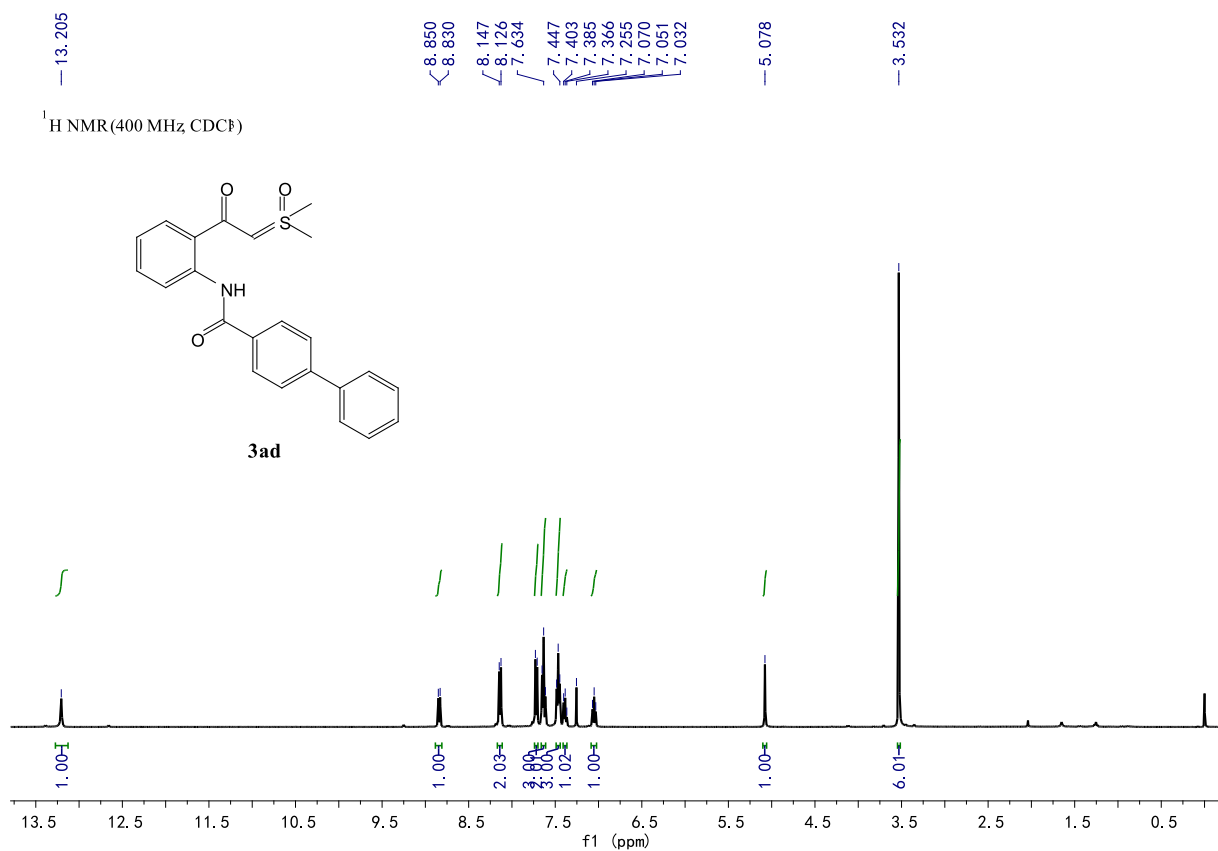



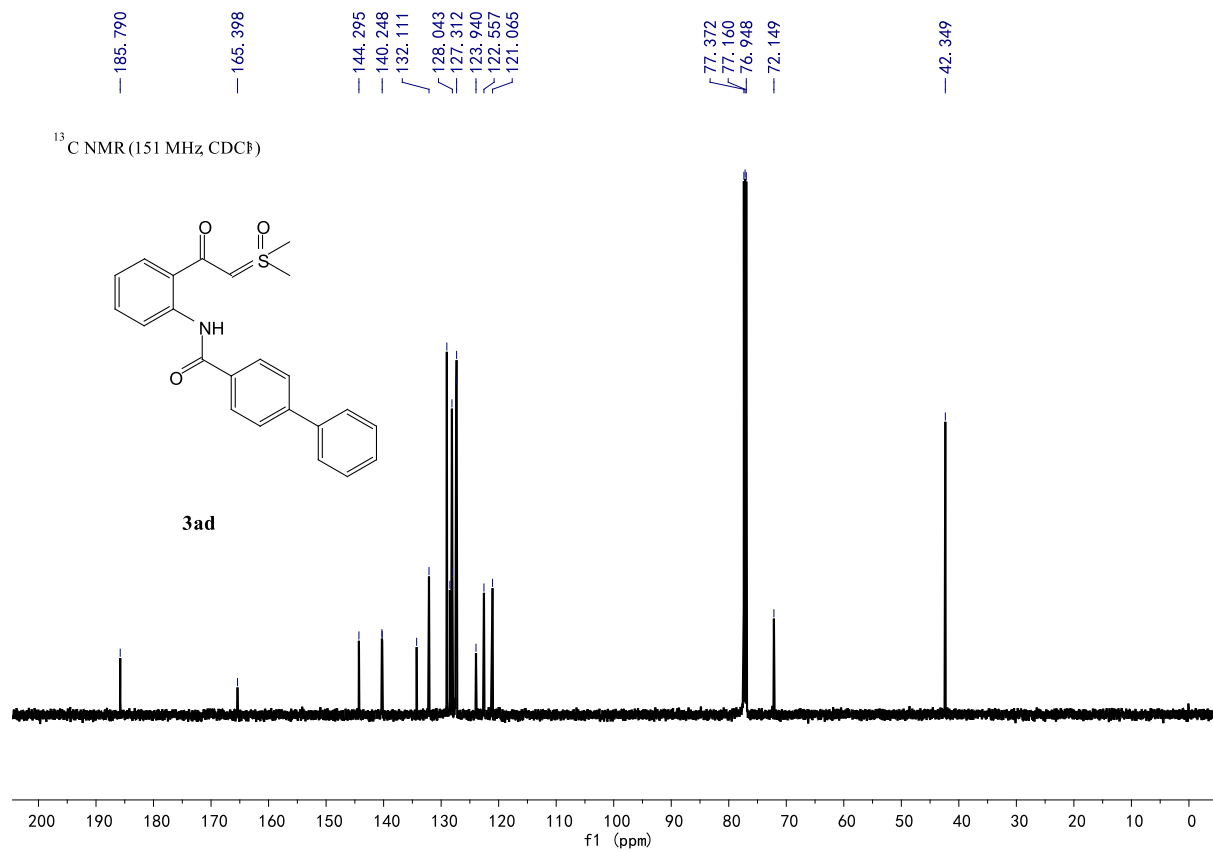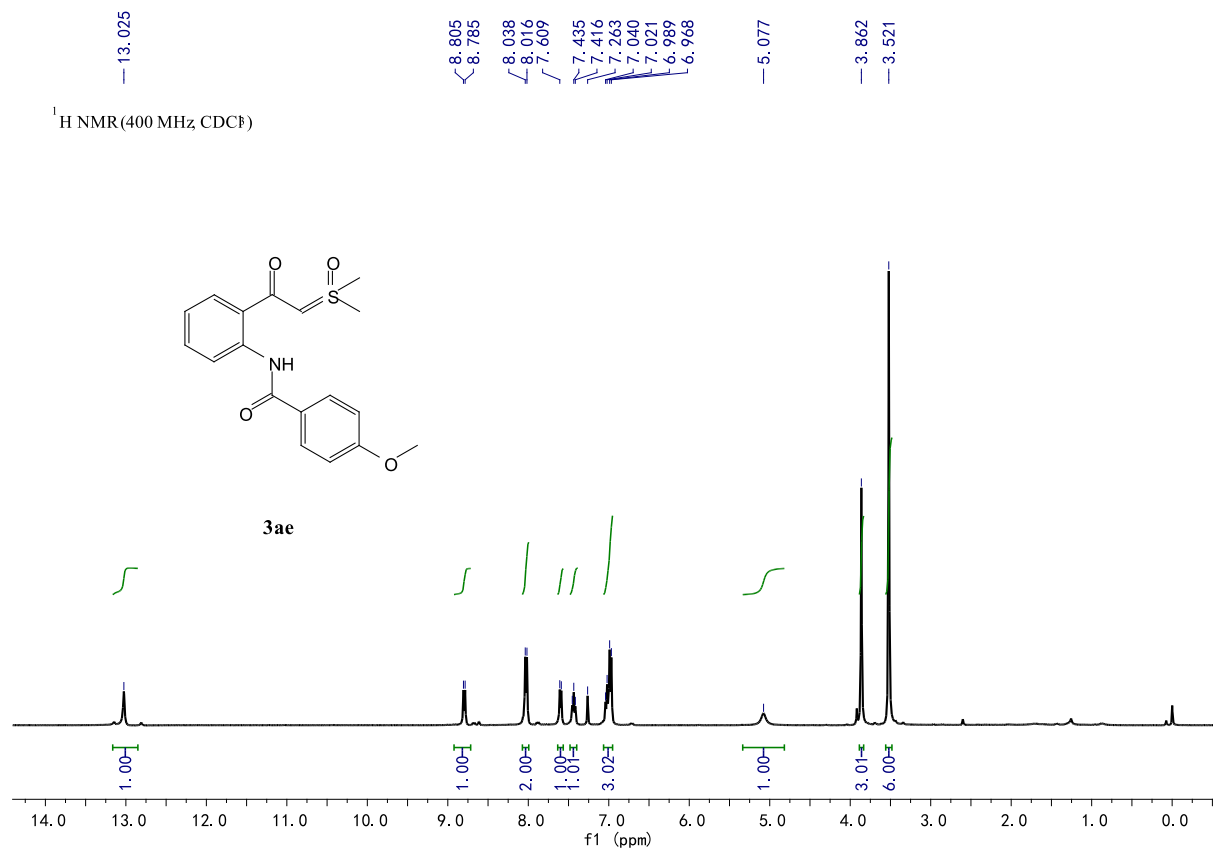

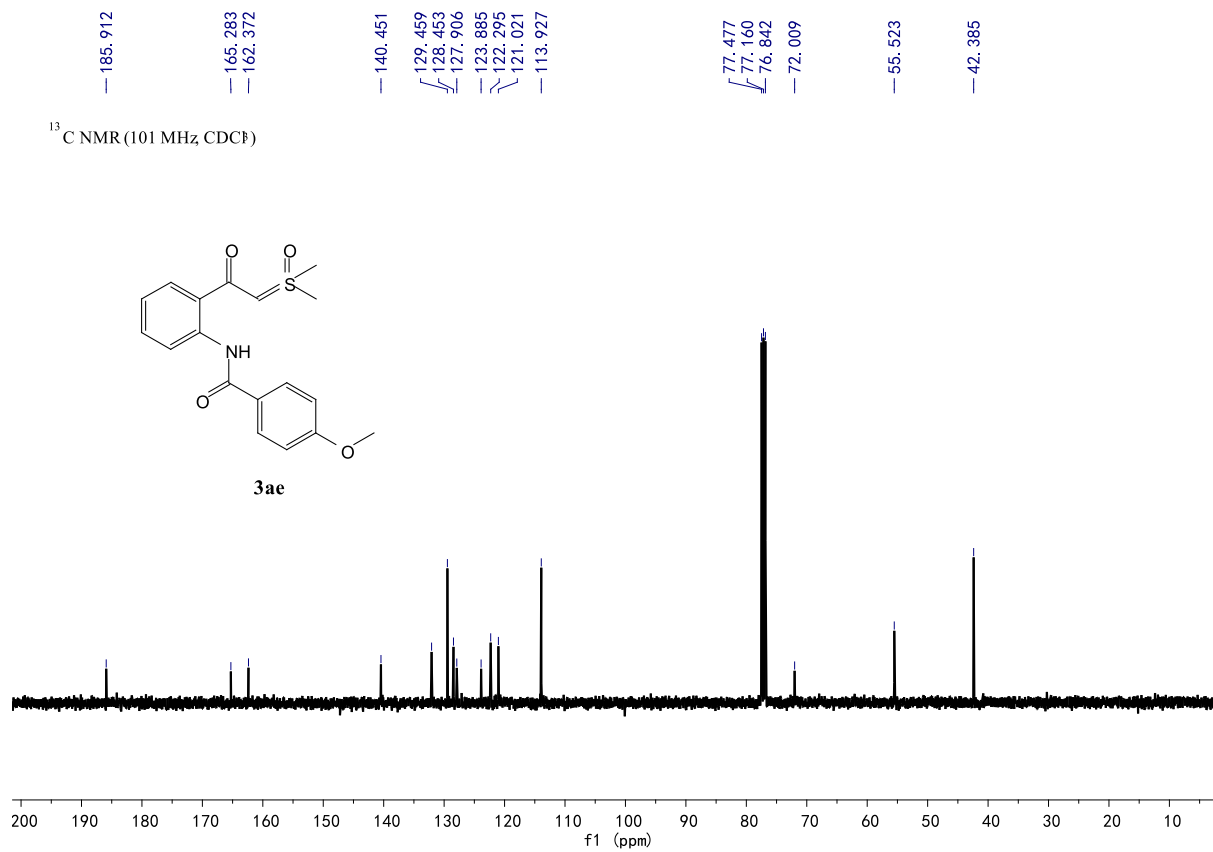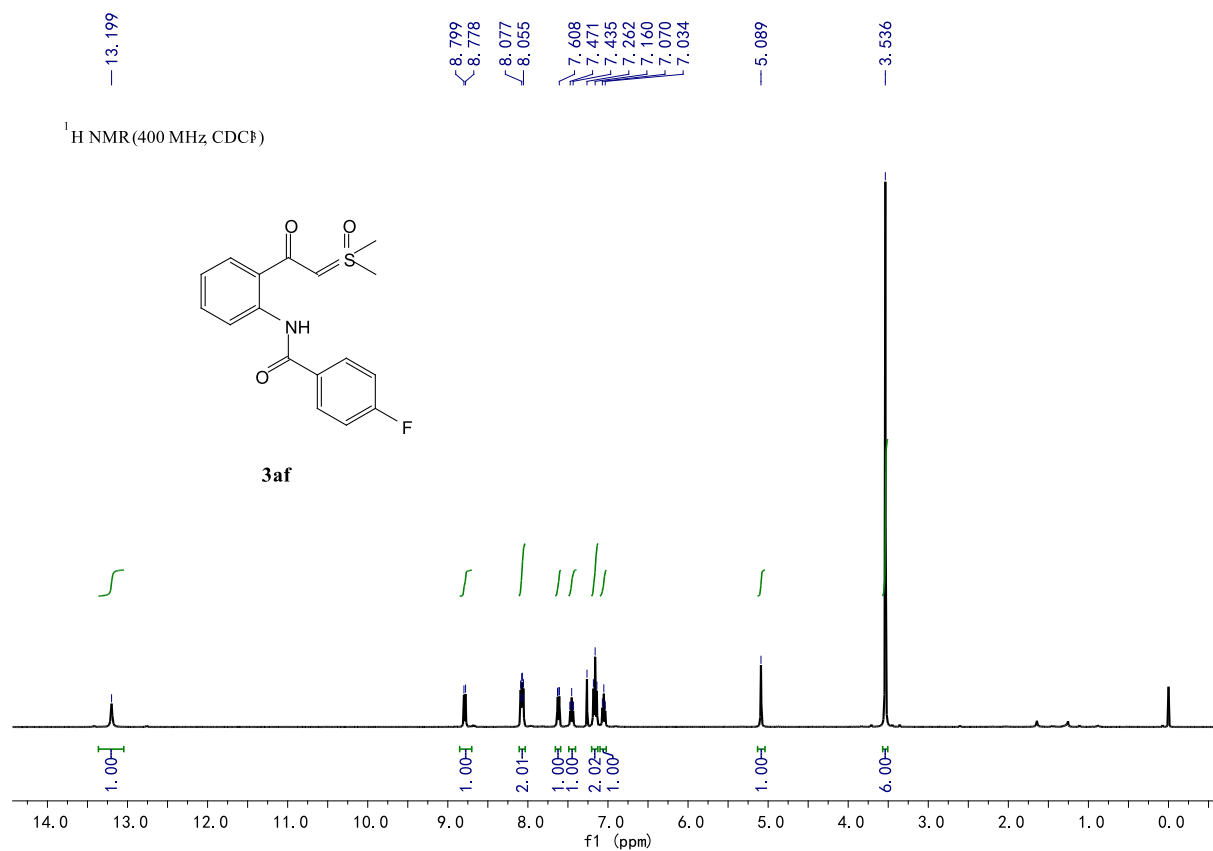

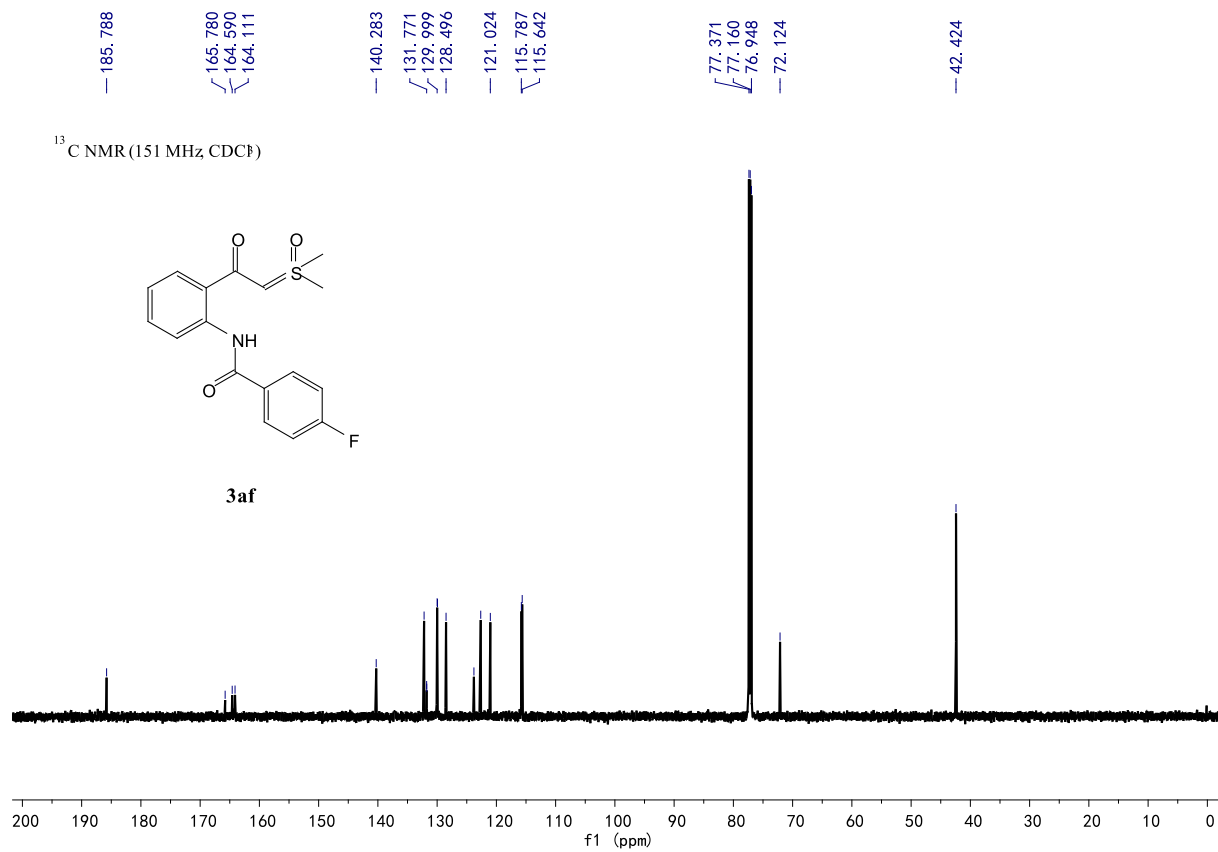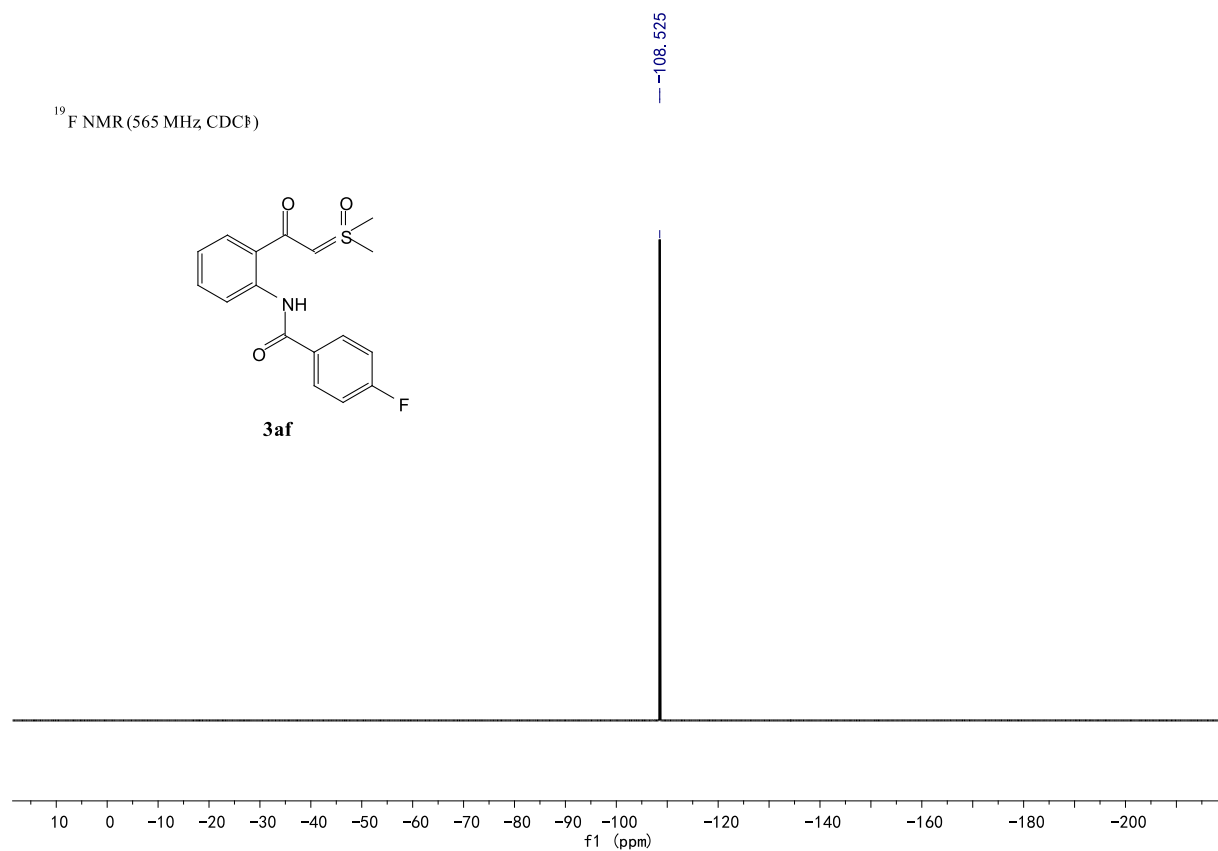

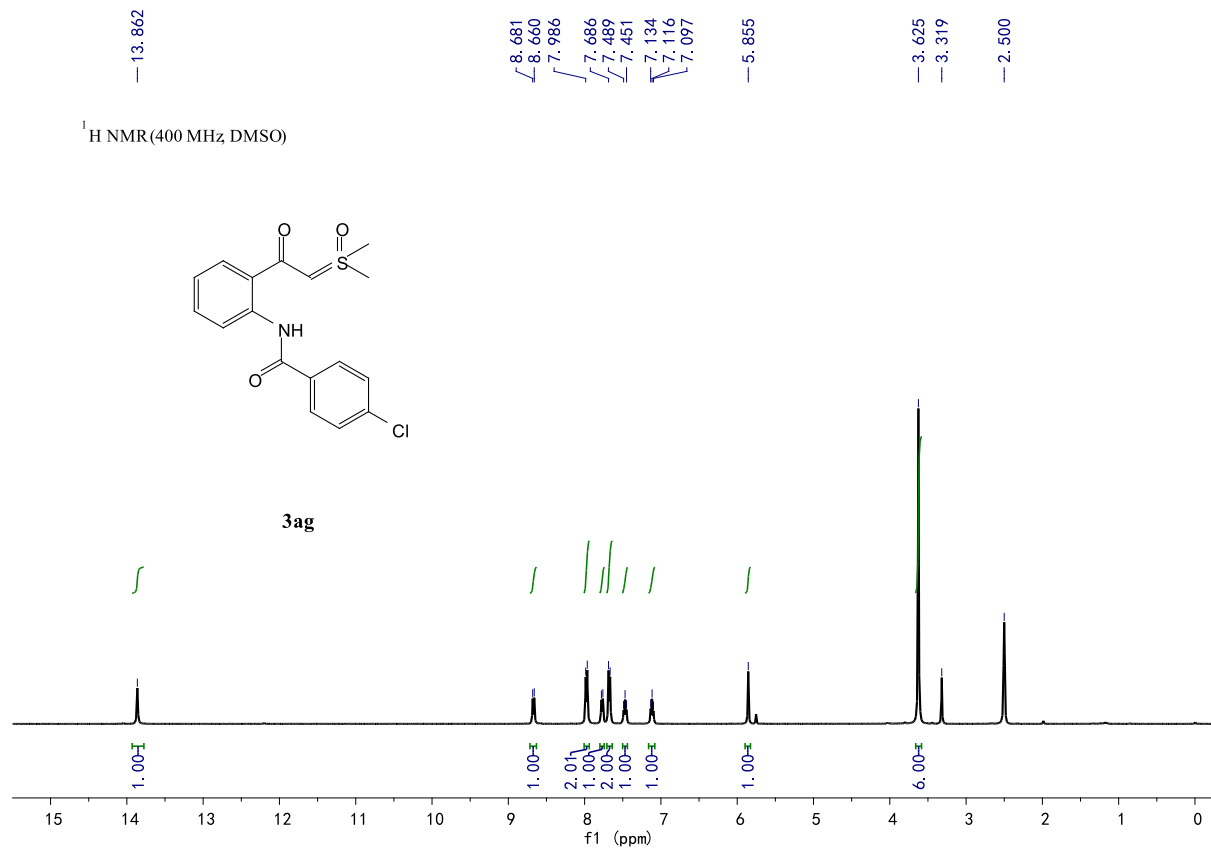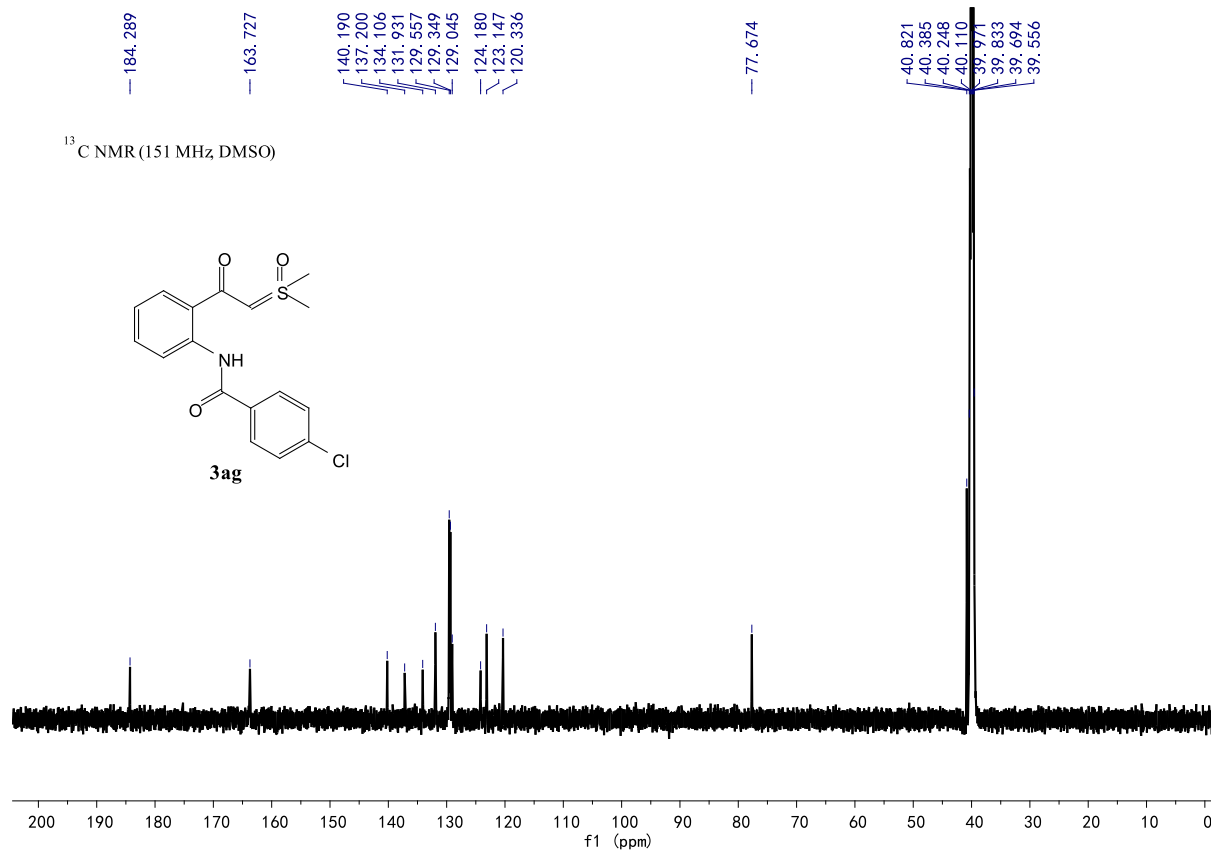

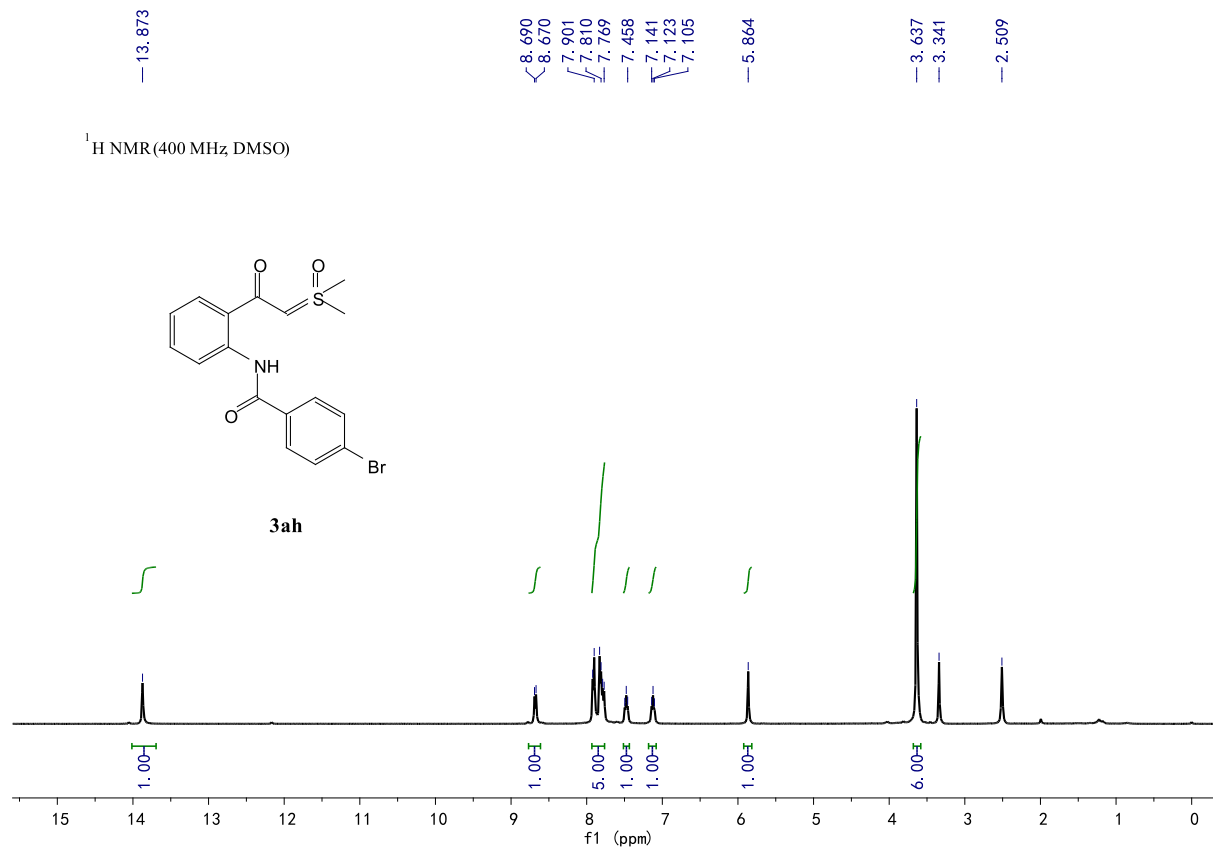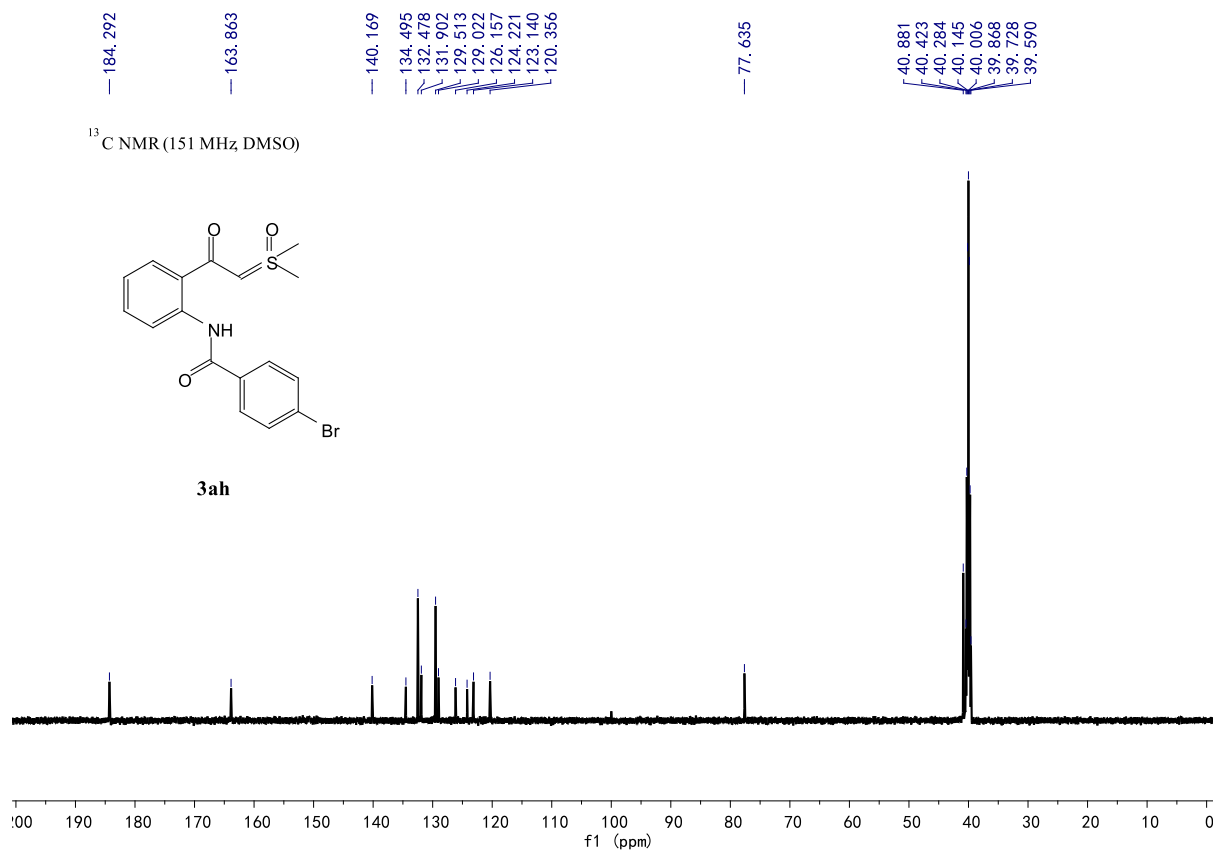

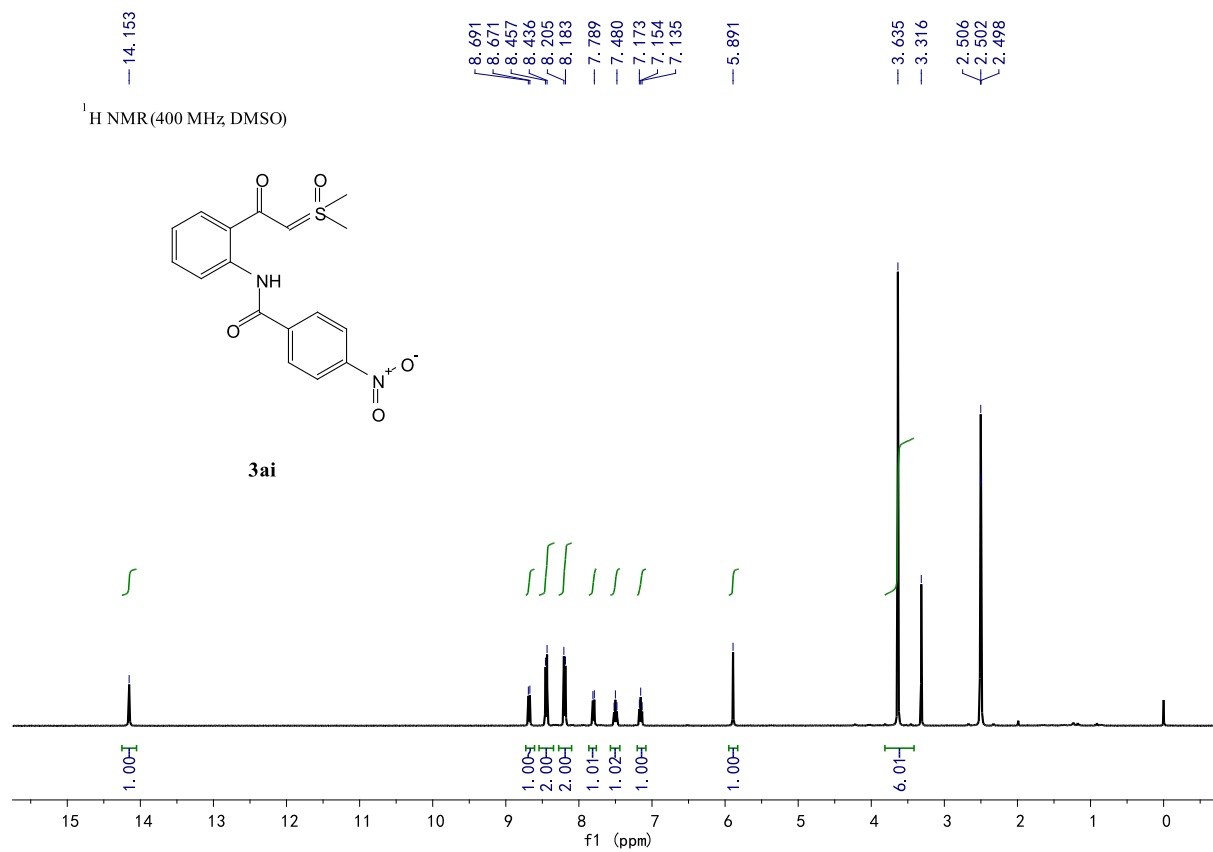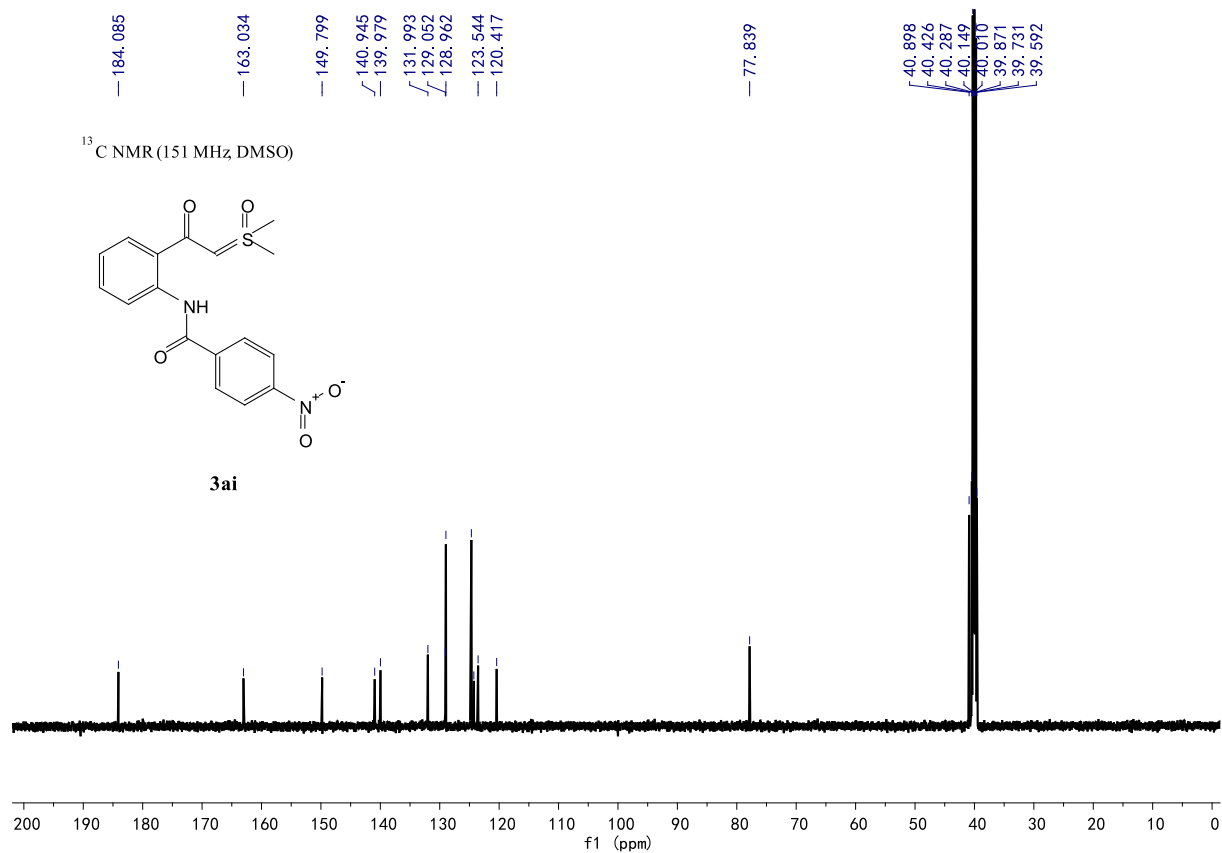

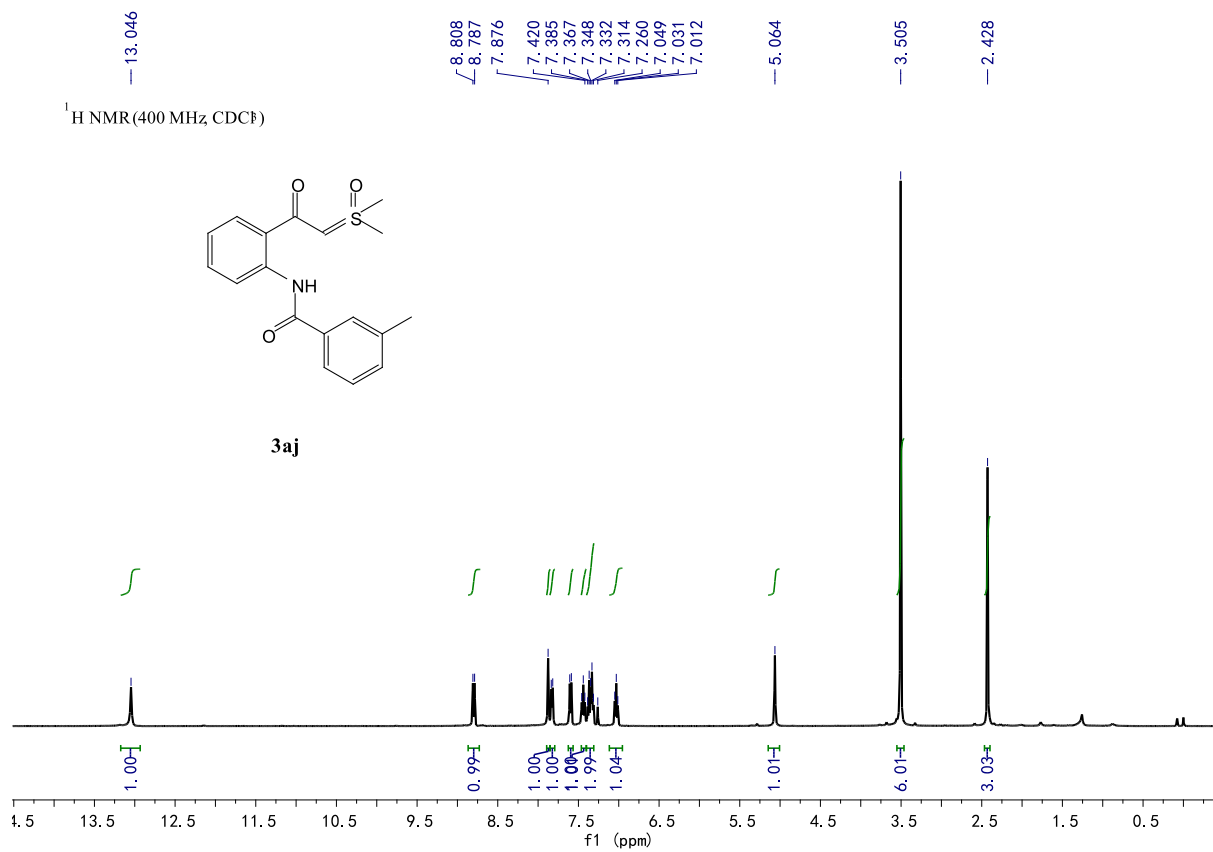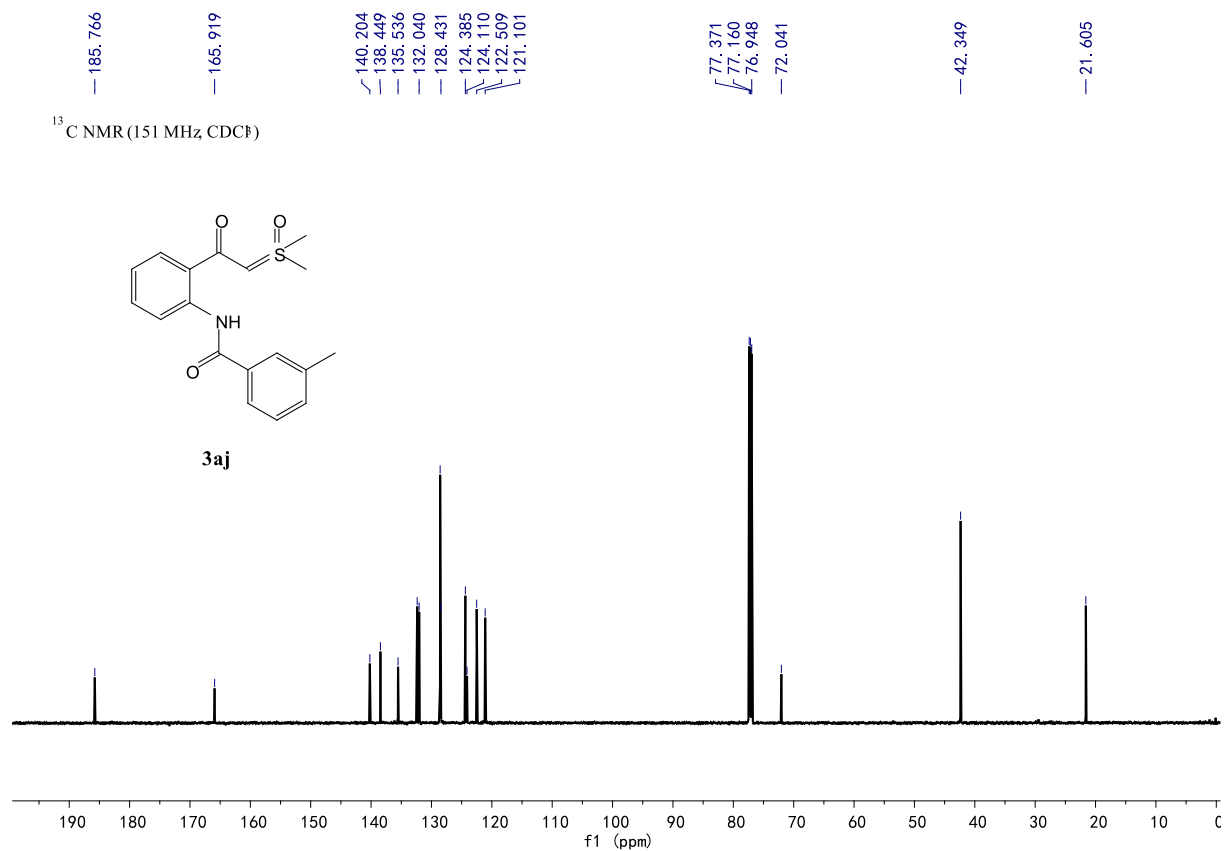

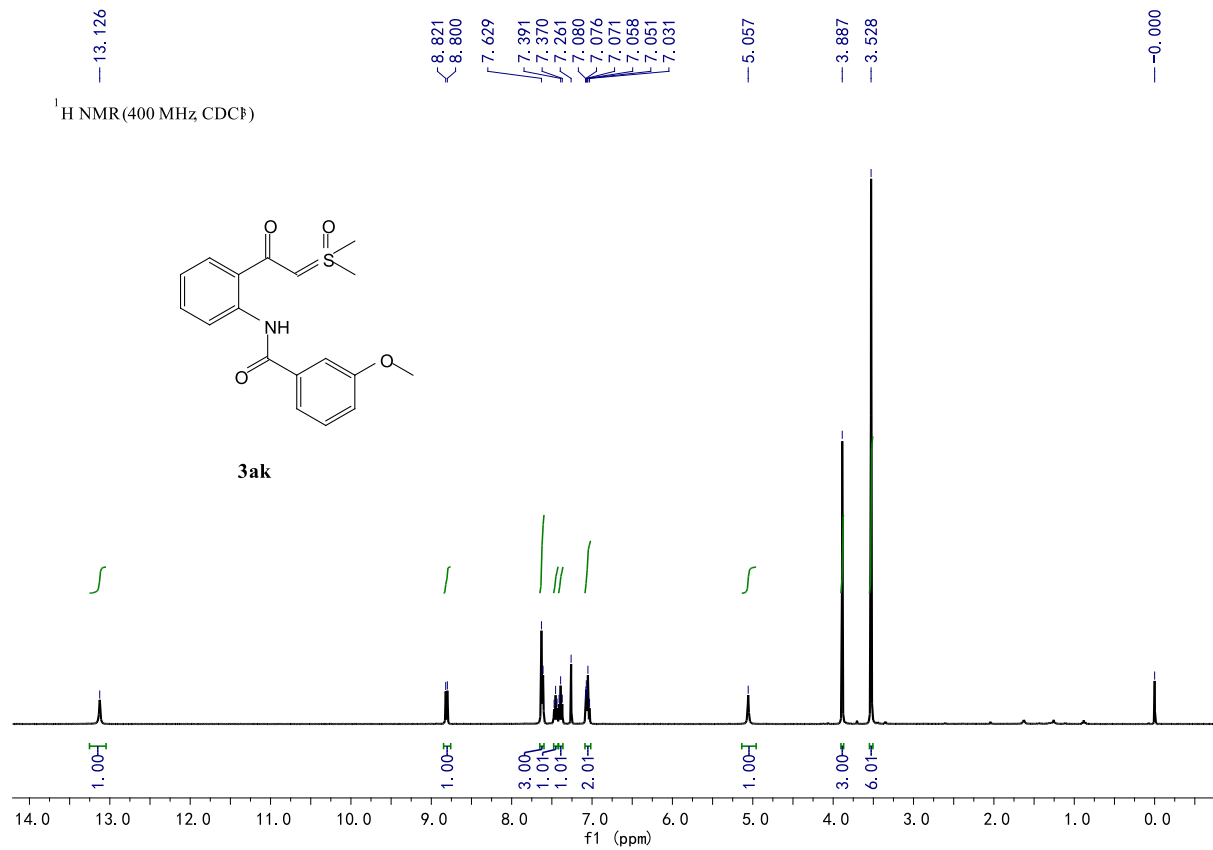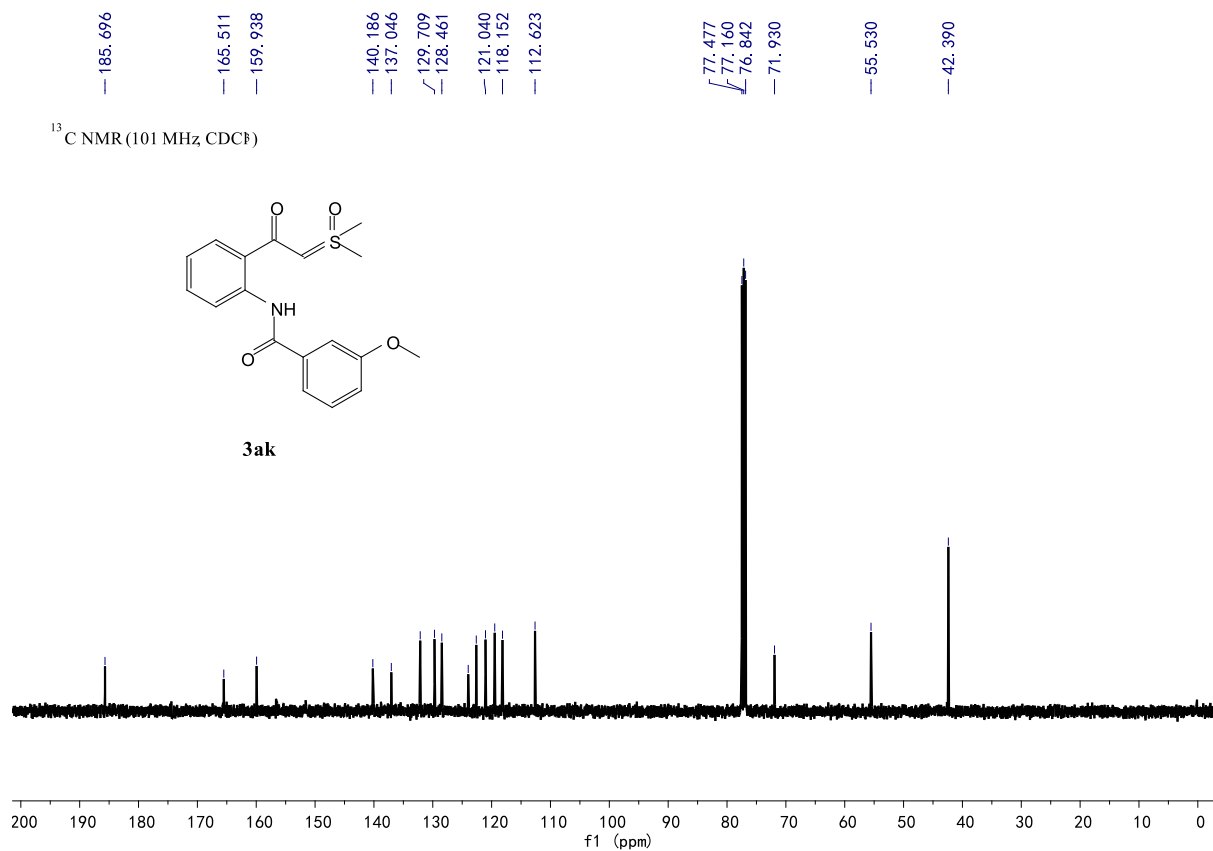



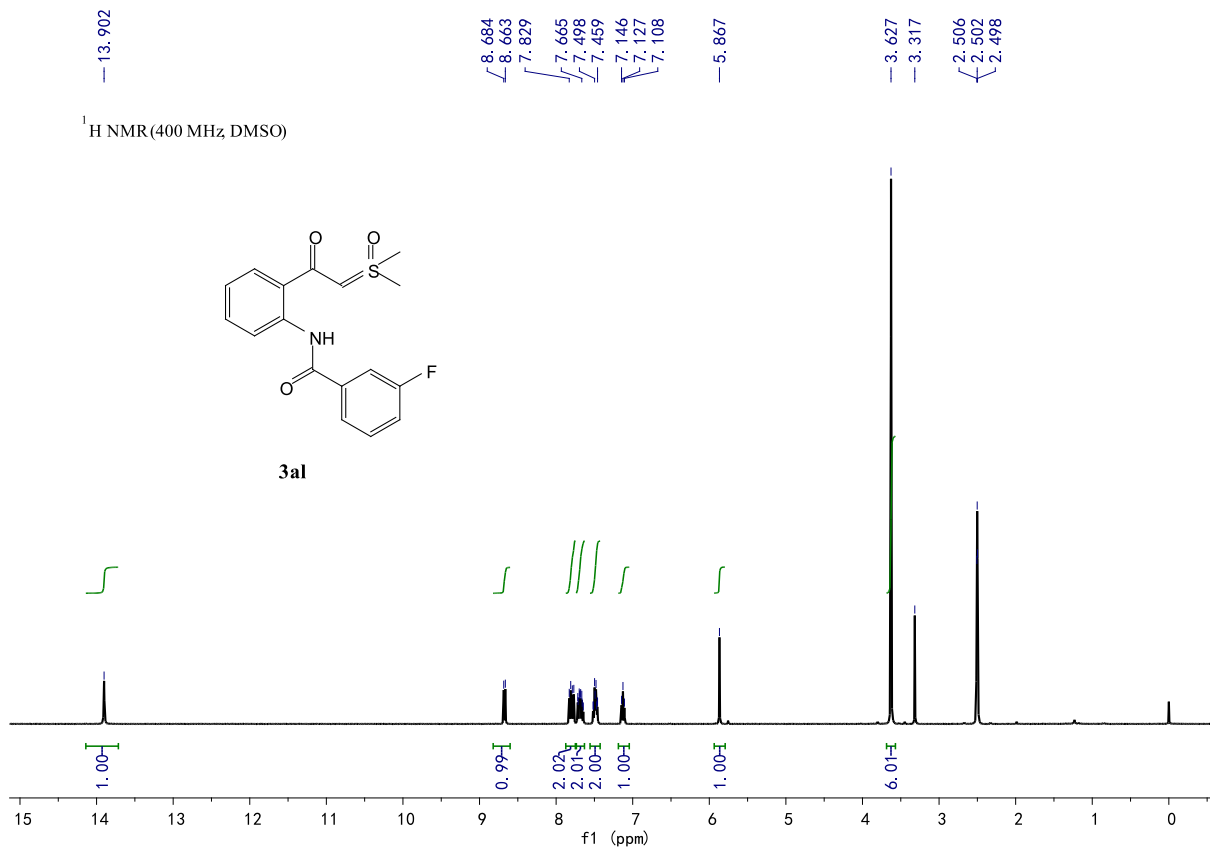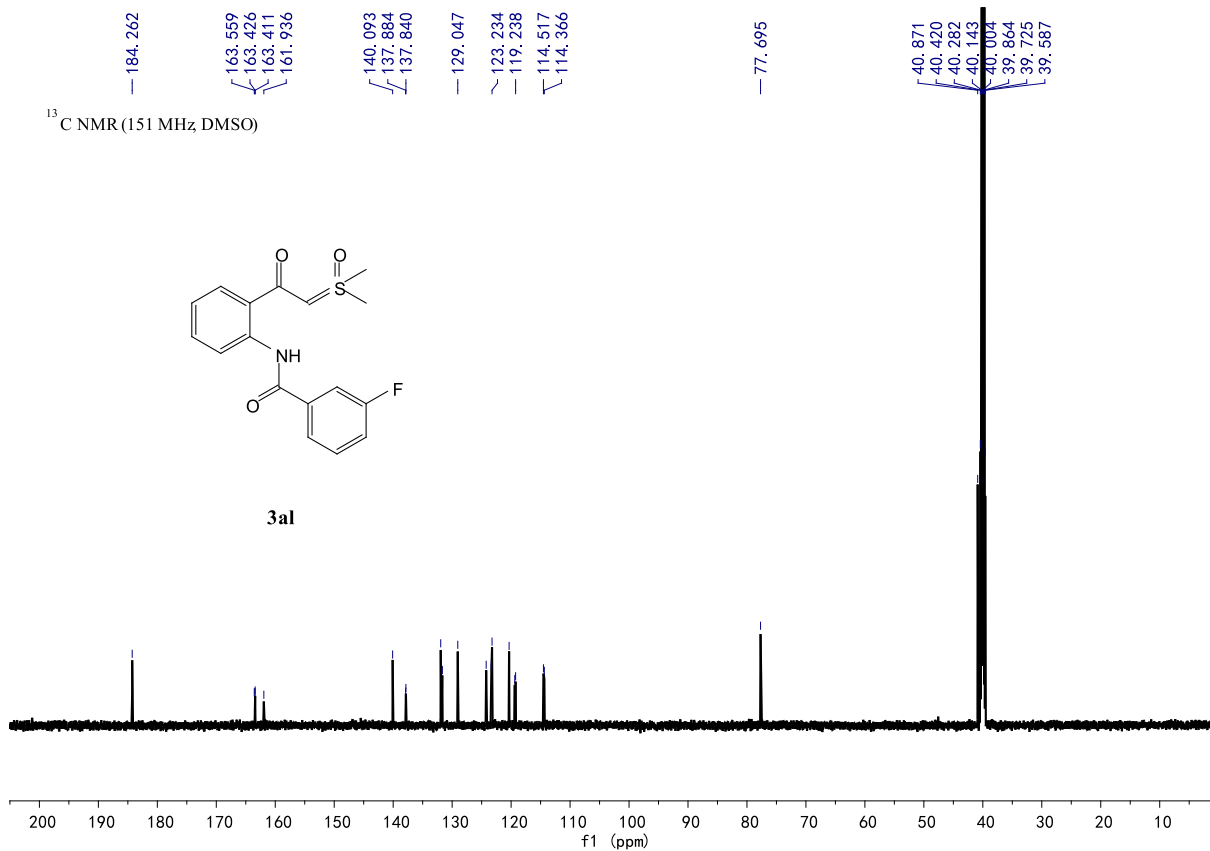

<sup>19</sup>F NMR (565 MHz, DMSO)

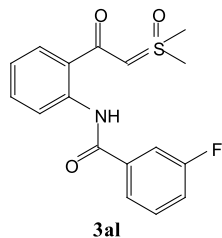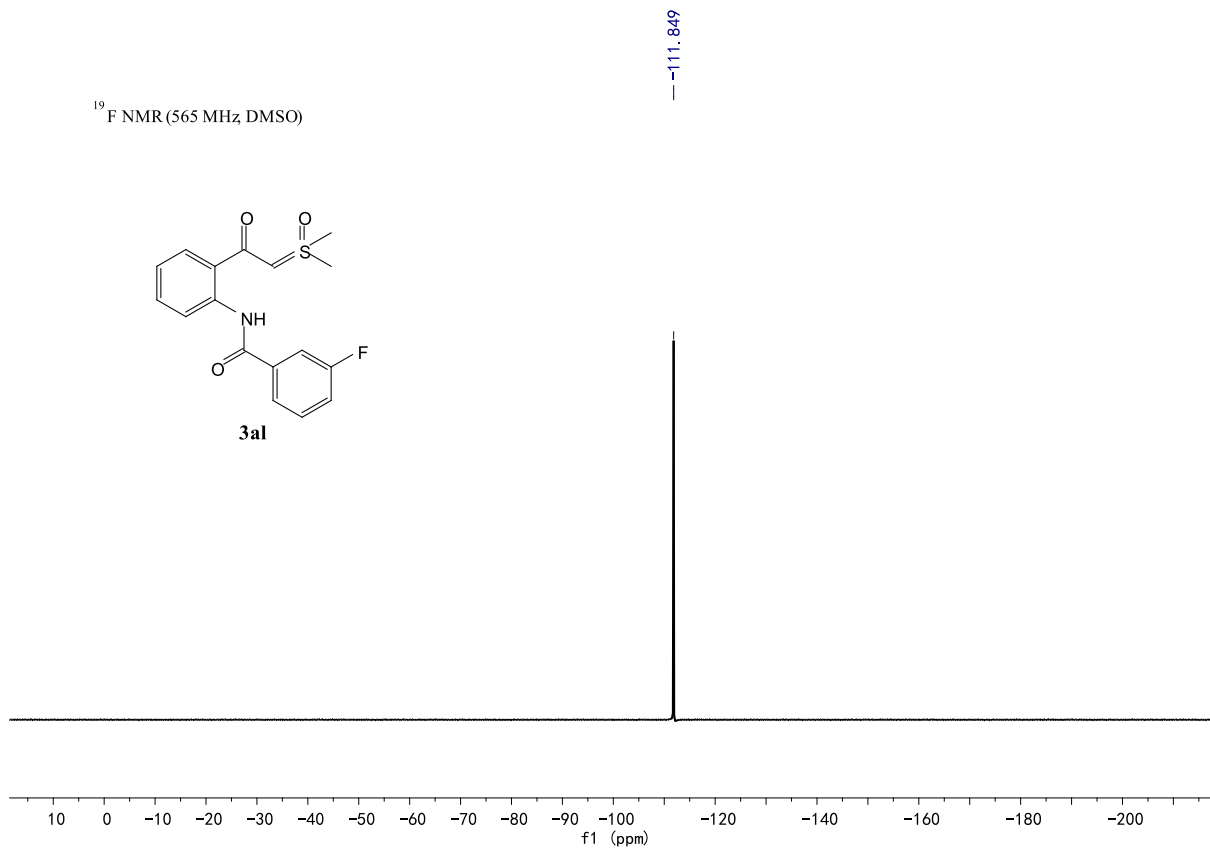

<sup>1</sup>H NMR (400 MHz, DMSO)

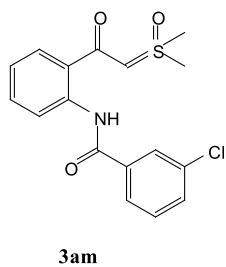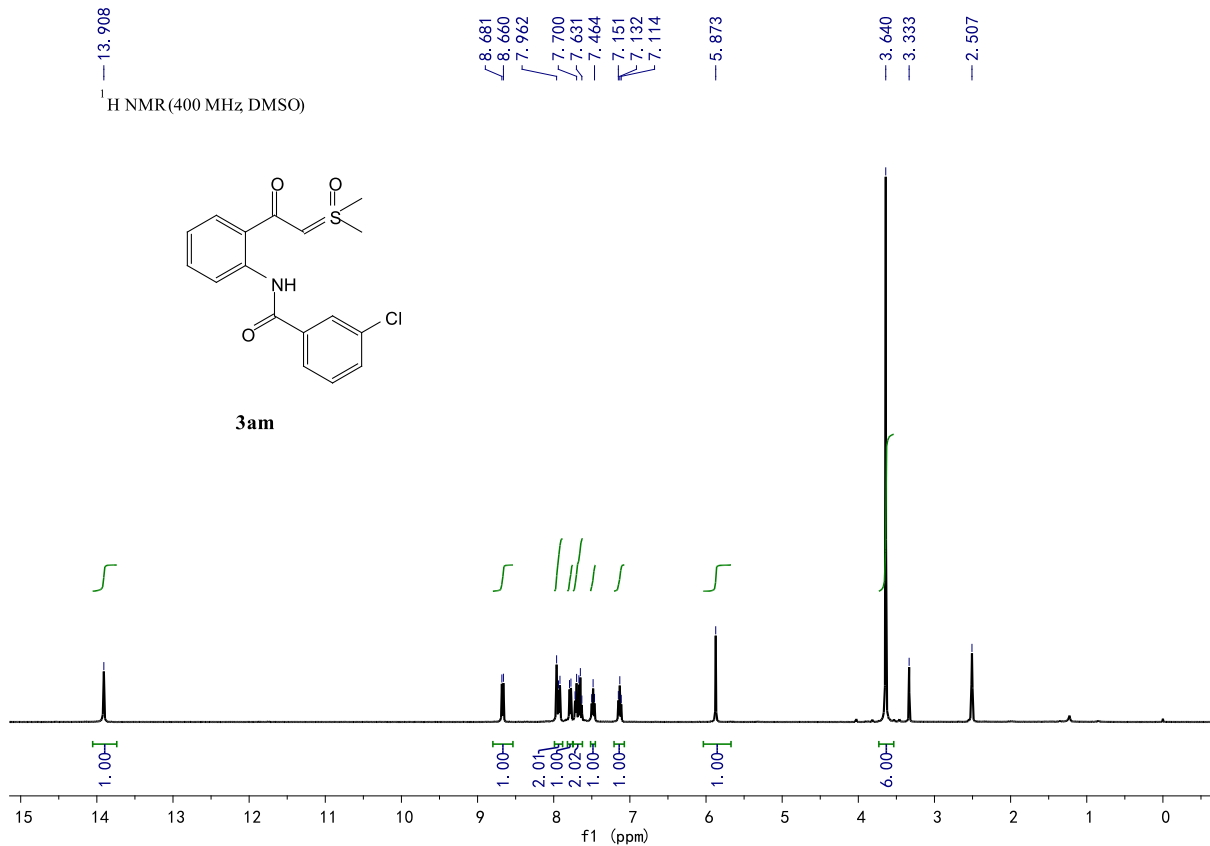

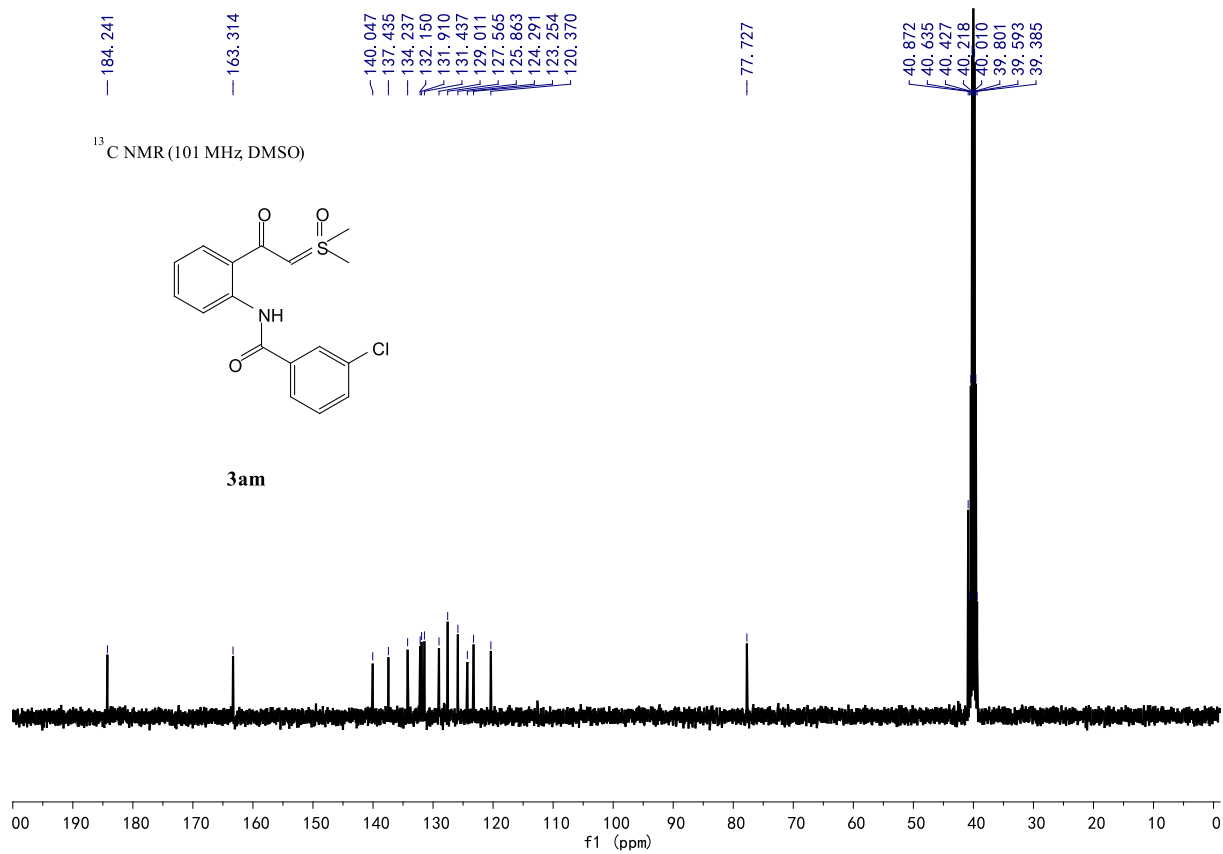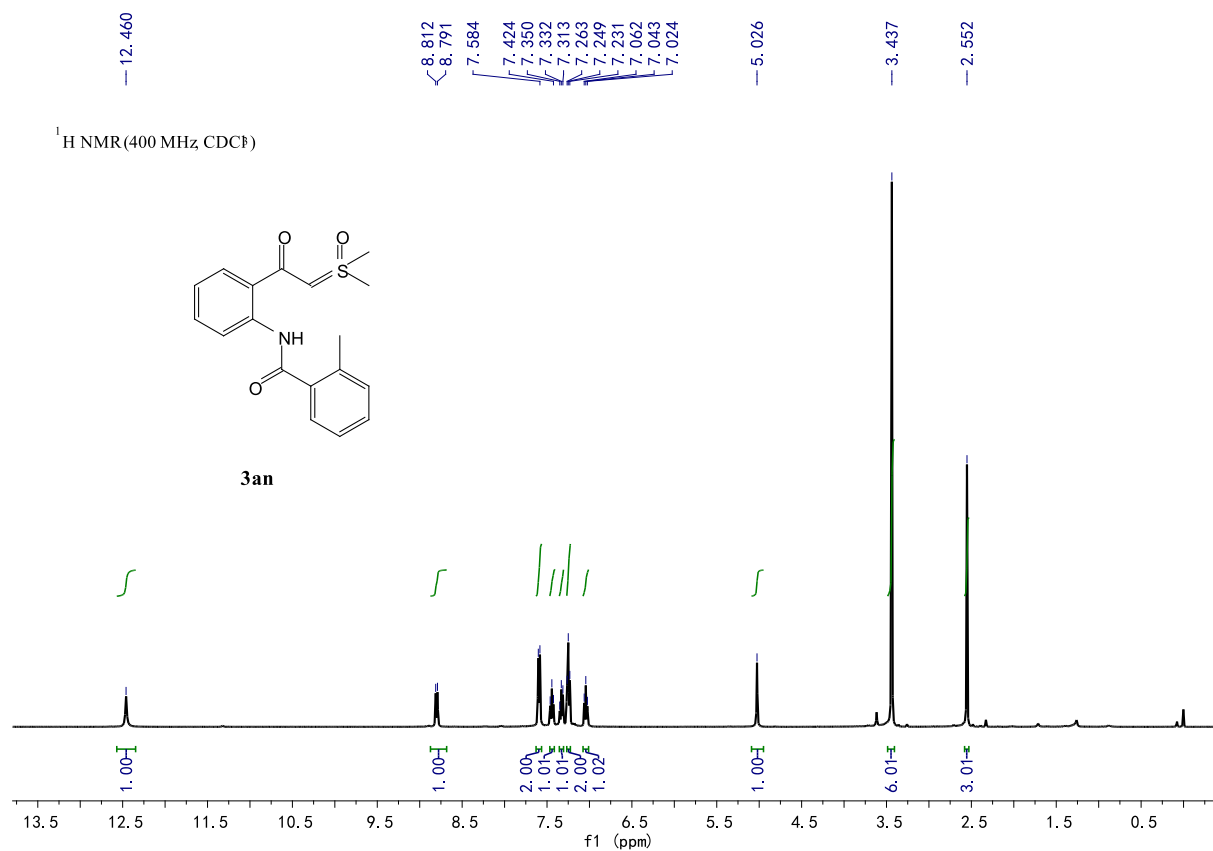

<sup>13</sup>C NMR (151 MHz, CDCl<sub>3</sub>)

185.500  
168.470  
139.980  
137.165  
136.915  
131.961  
131.363  
130.066  
128.448  
127.421  
125.982  
124.168  
122.627  
120.927  
77.372  
77.160  
76.948  
71.911  
42.257  
20.387

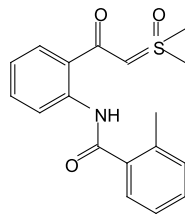

**3an**

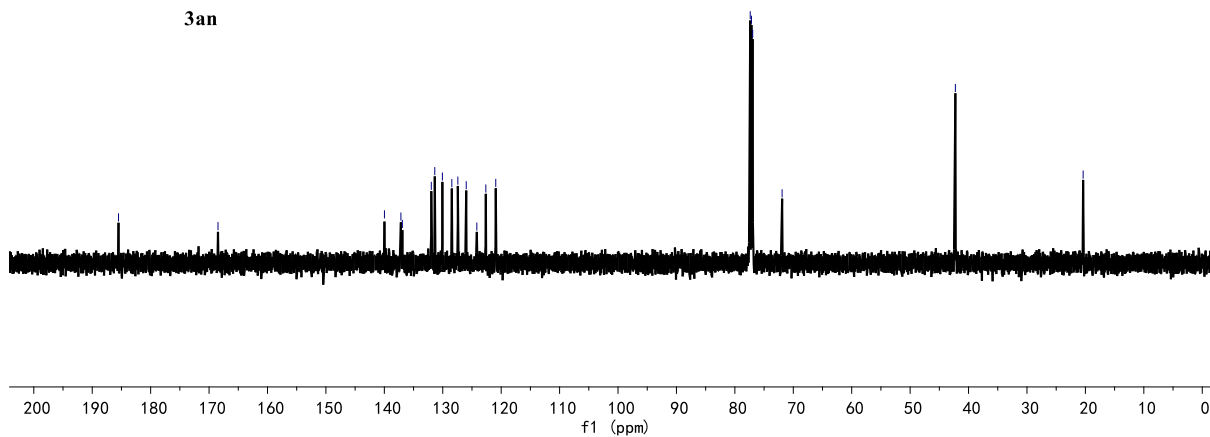

<sup>1</sup>H NMR (600 MHz, CDCl<sub>3</sub>)

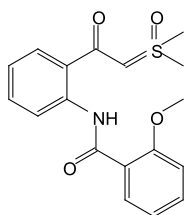

**3ao**

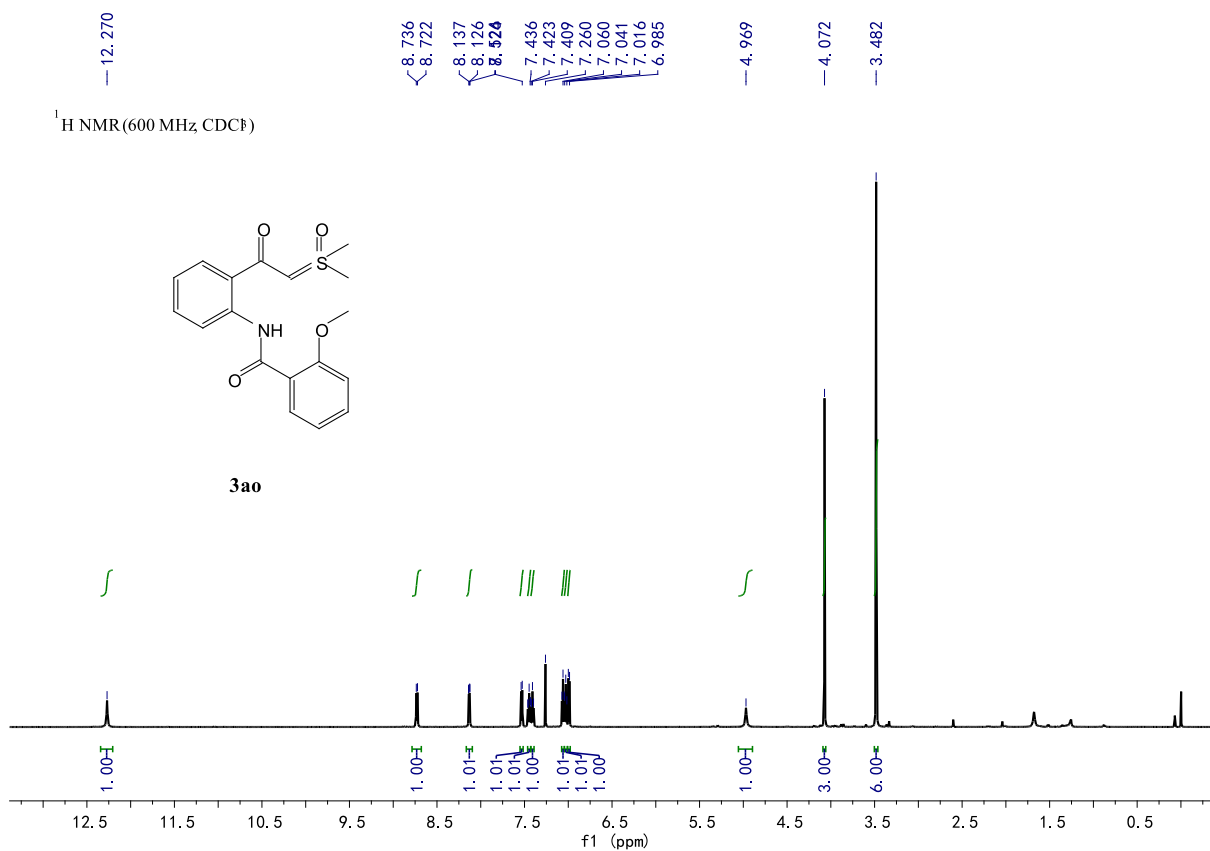

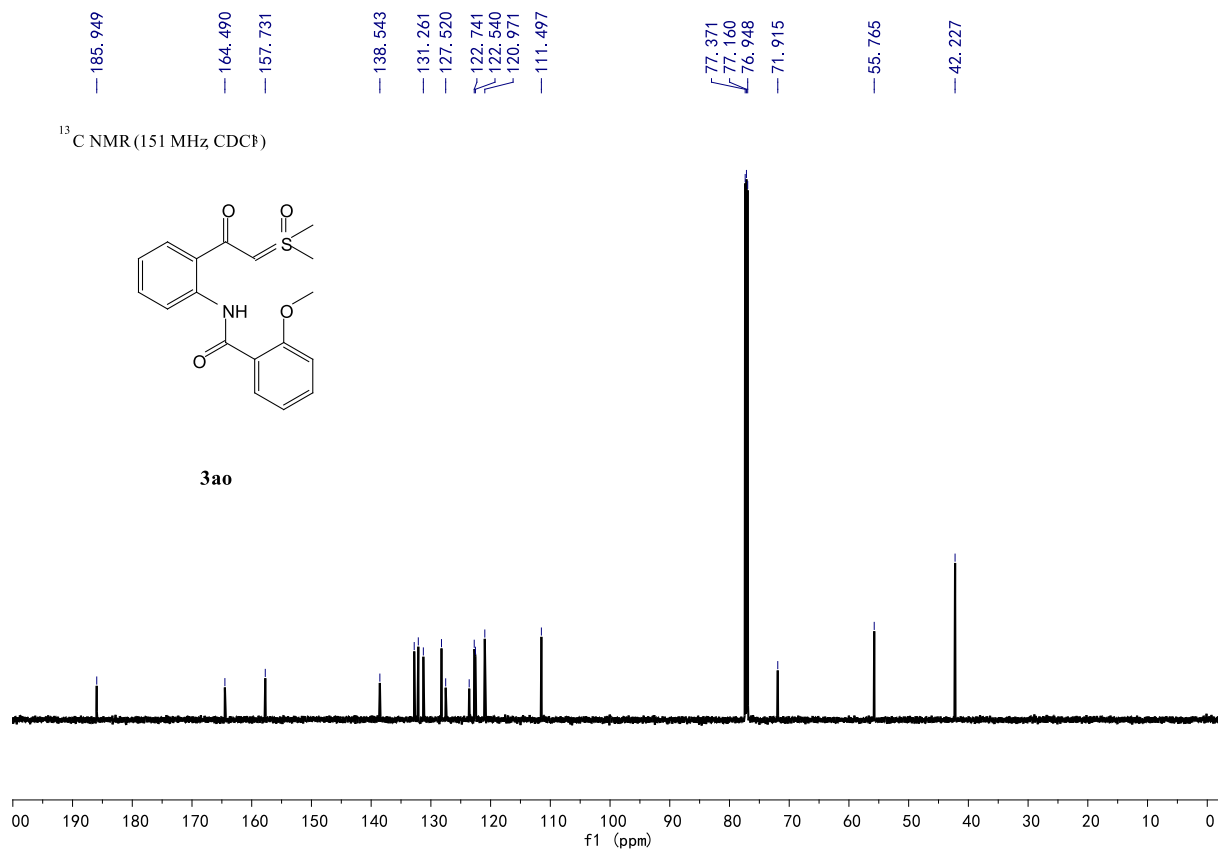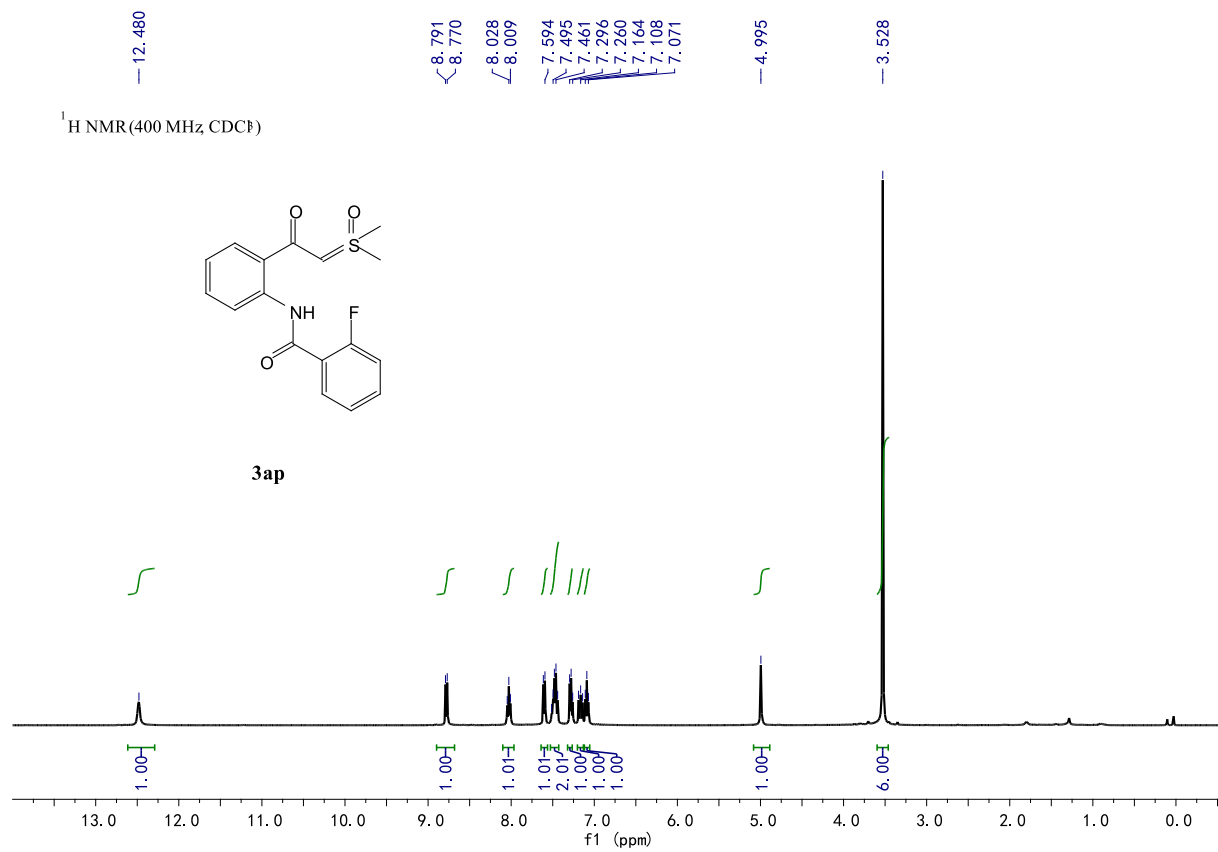

<sup>13</sup>C NMR (151 MHz CDCl<sub>3</sub>)  
 185.240, 162.412, 161.048, 159.387, 138.887, 138.583, 123.714, 121.708, 116.484, 116.330, 77.372, 77.160, 76.948, 71.804, 42.352

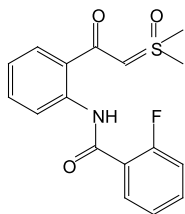

**3ap**

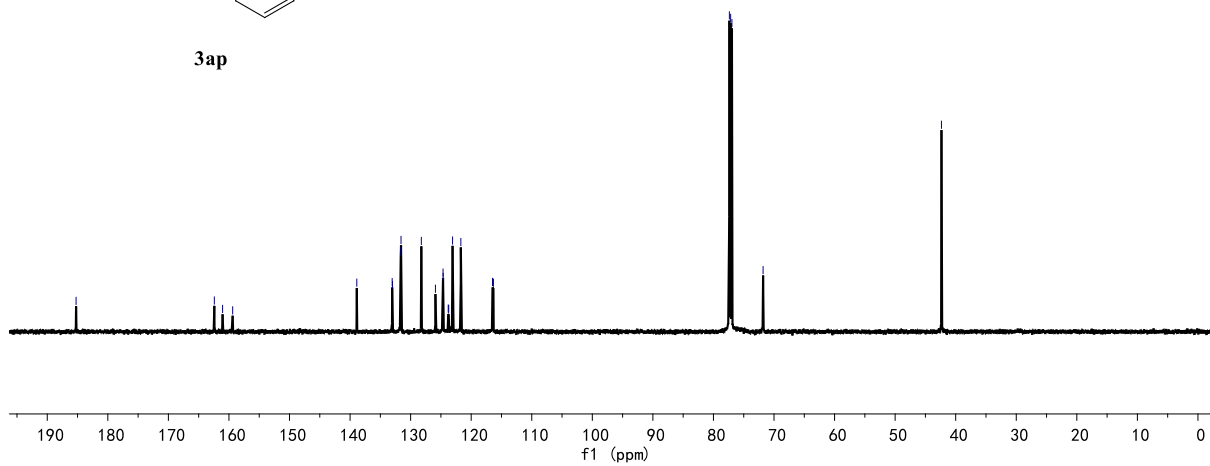

<sup>19</sup>F NMR (565 MHz CDCl<sub>3</sub>)

-112.967

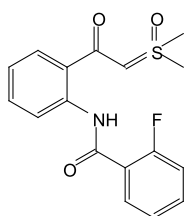

**3ap**

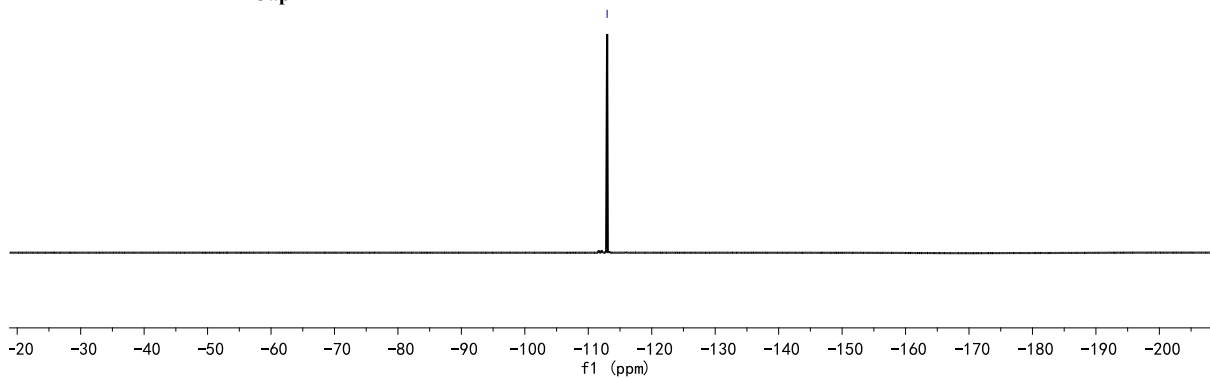

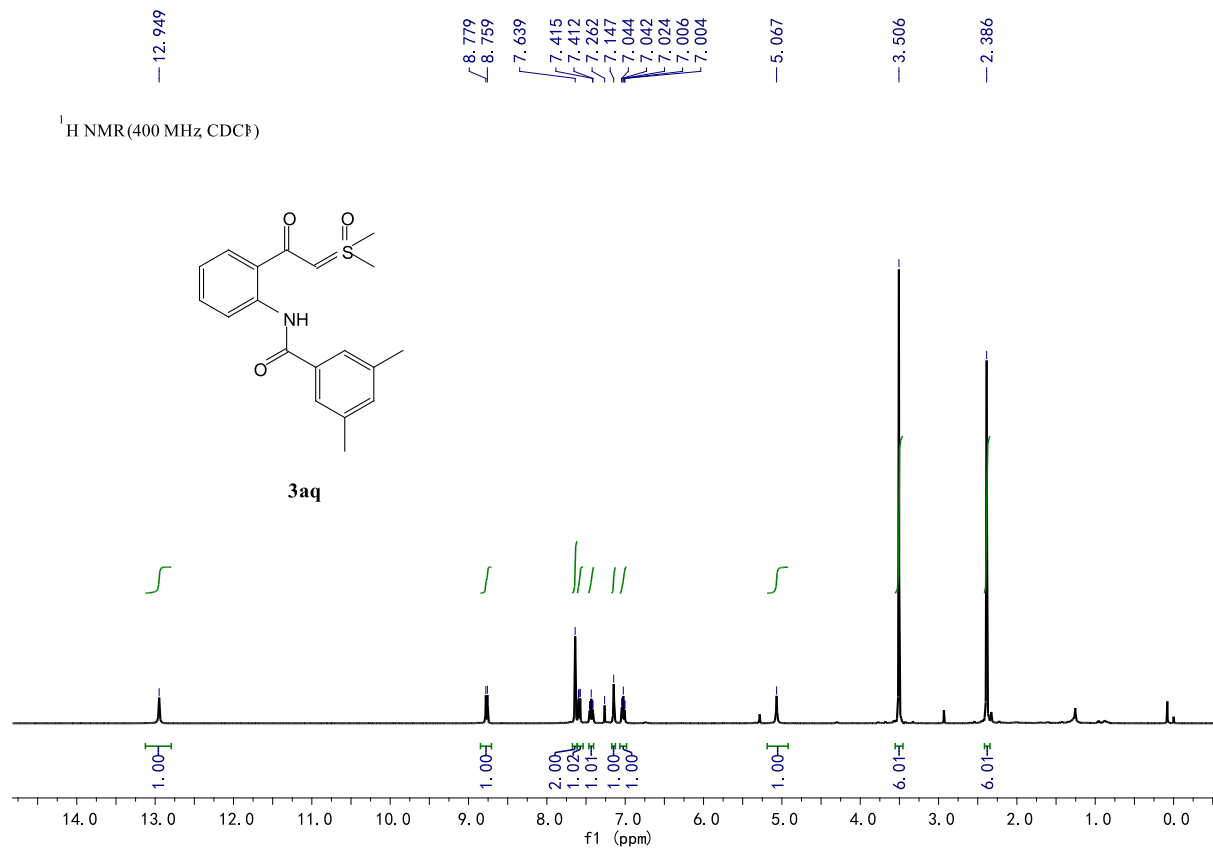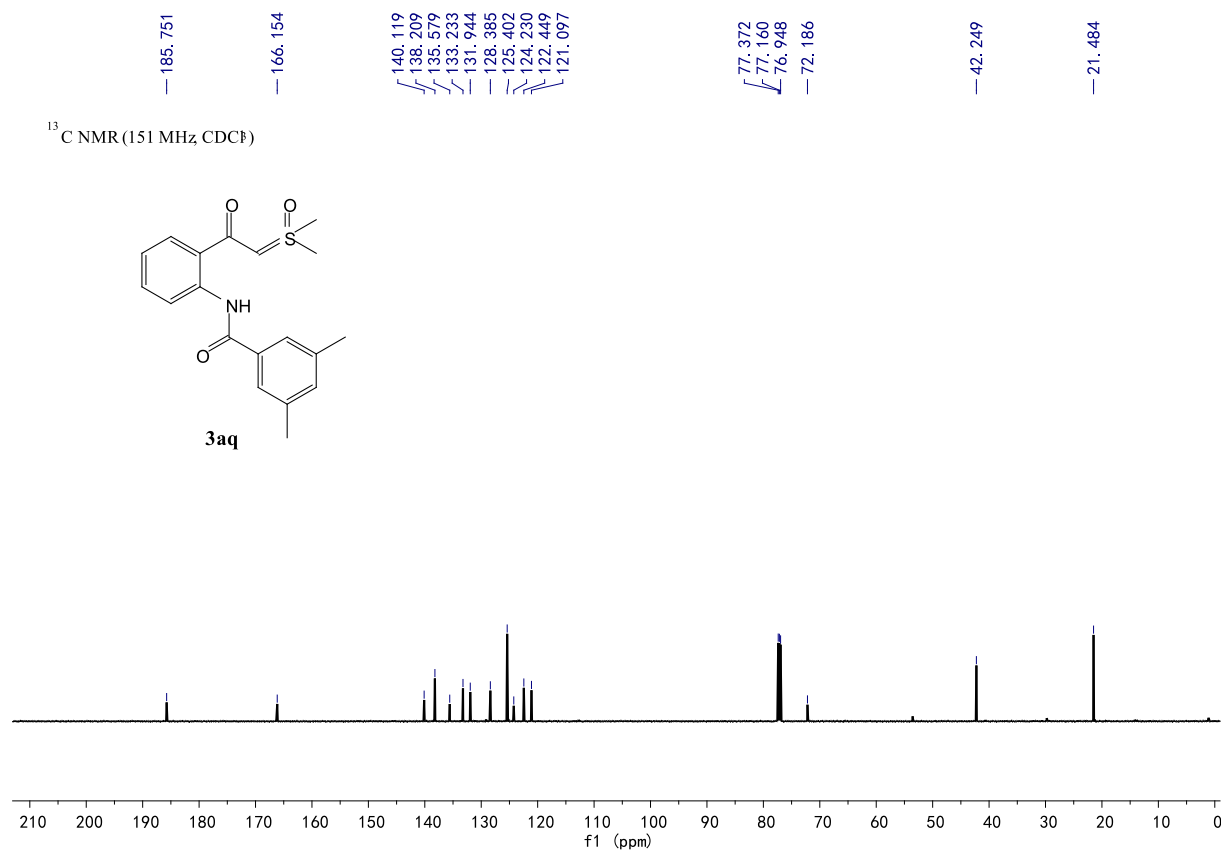

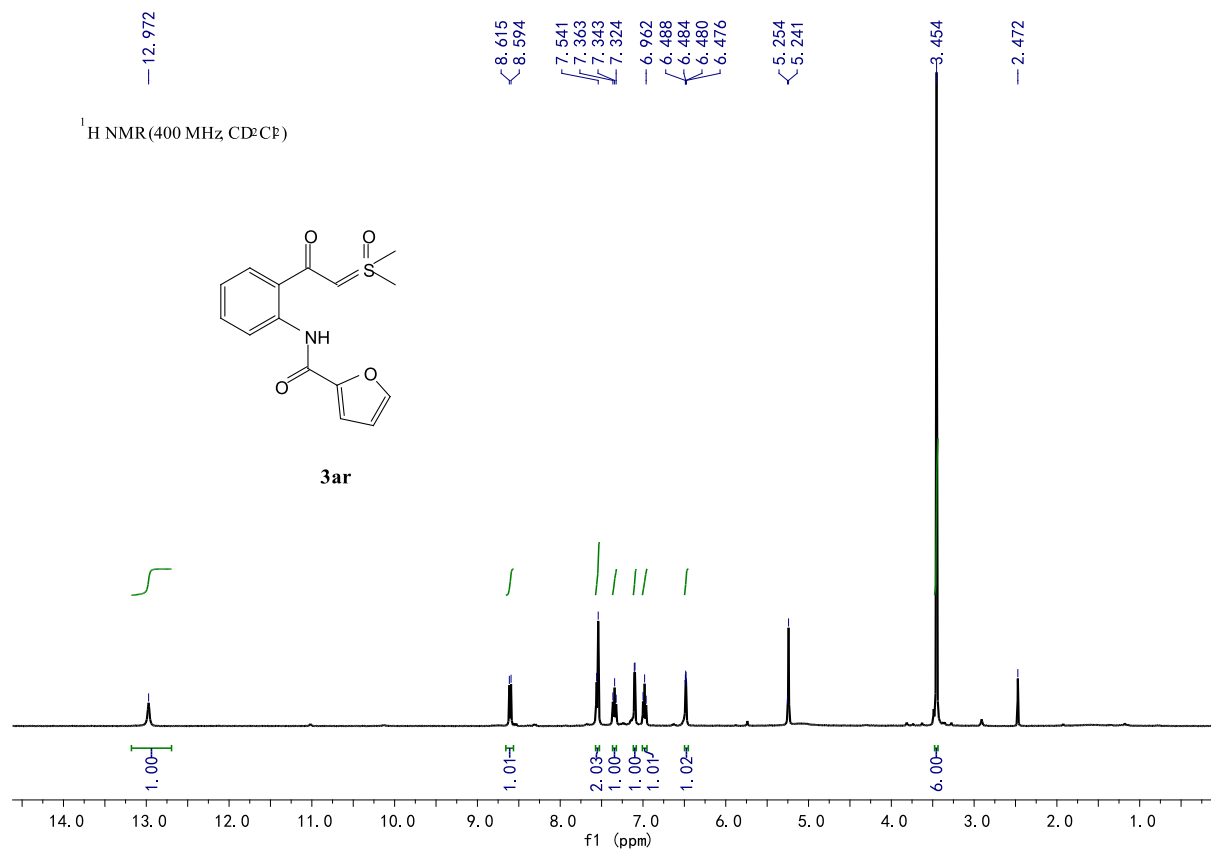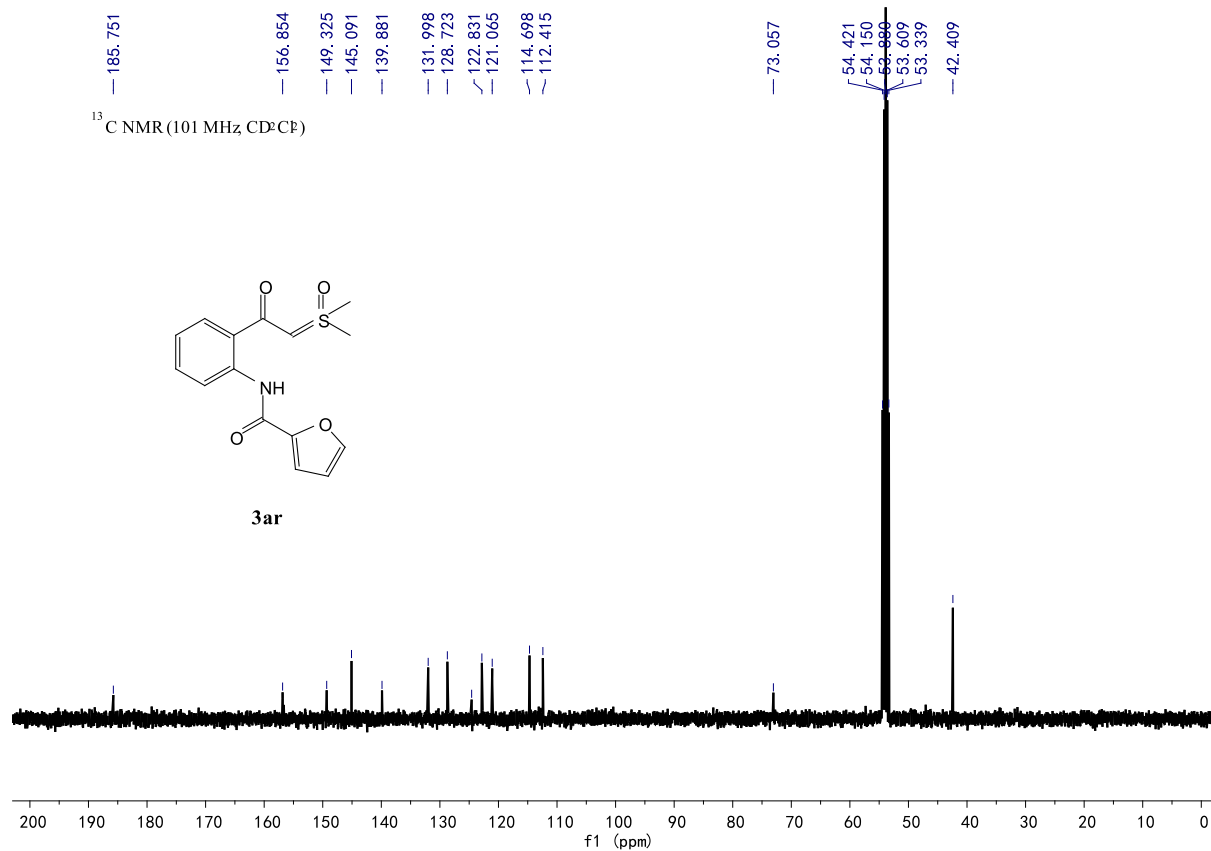



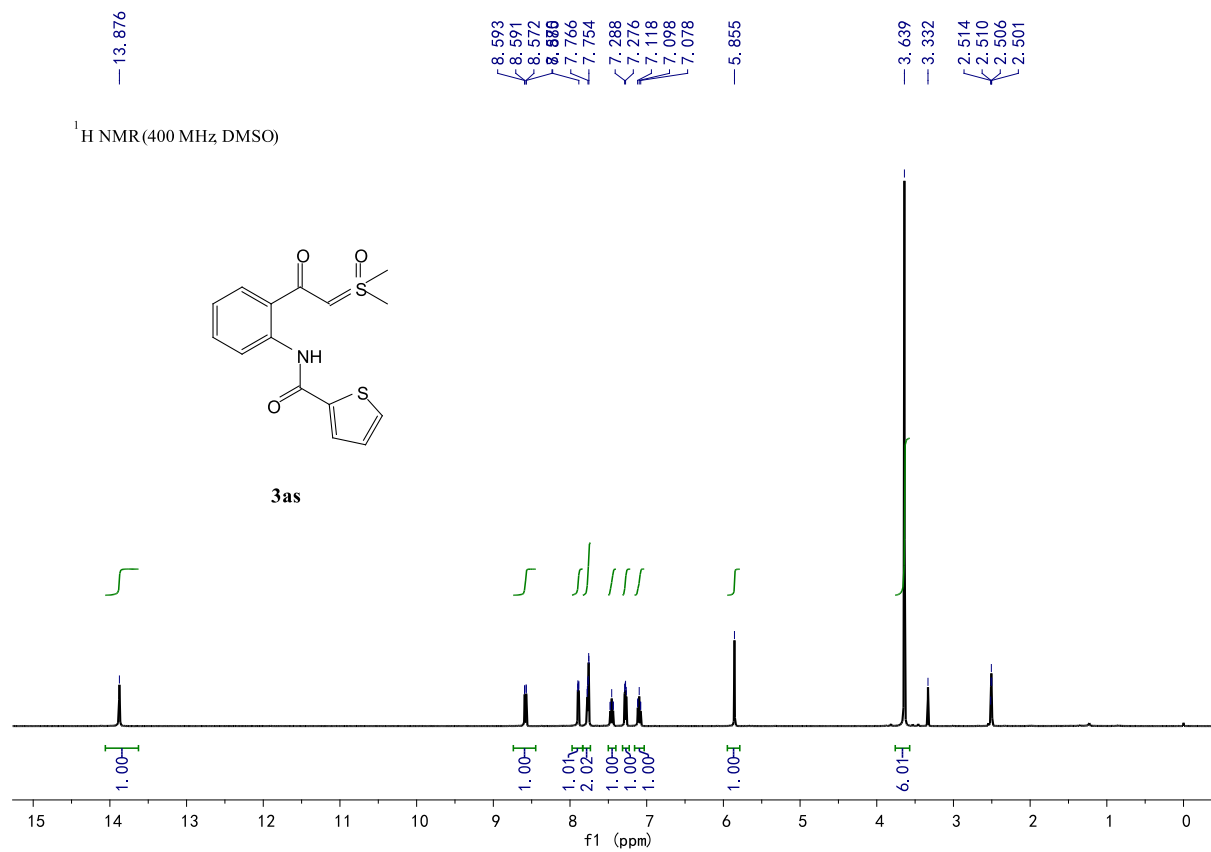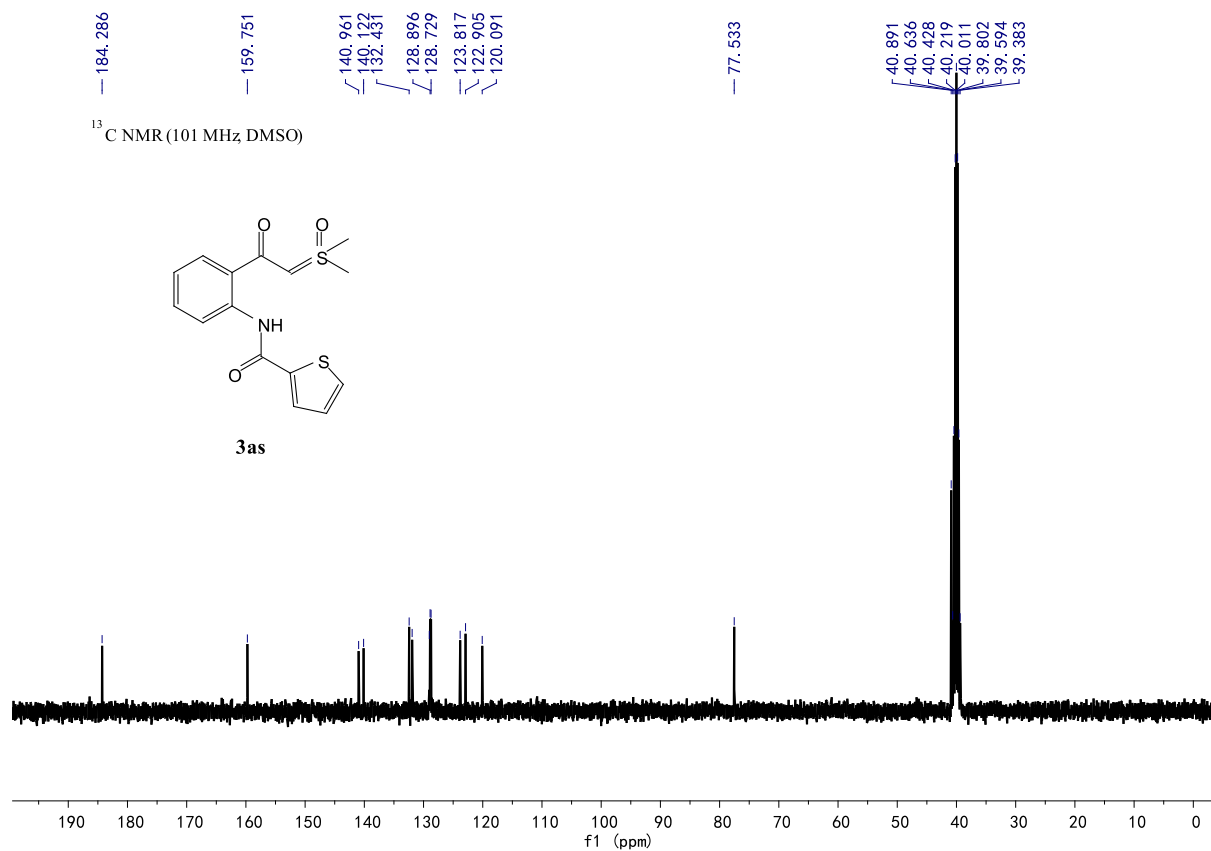

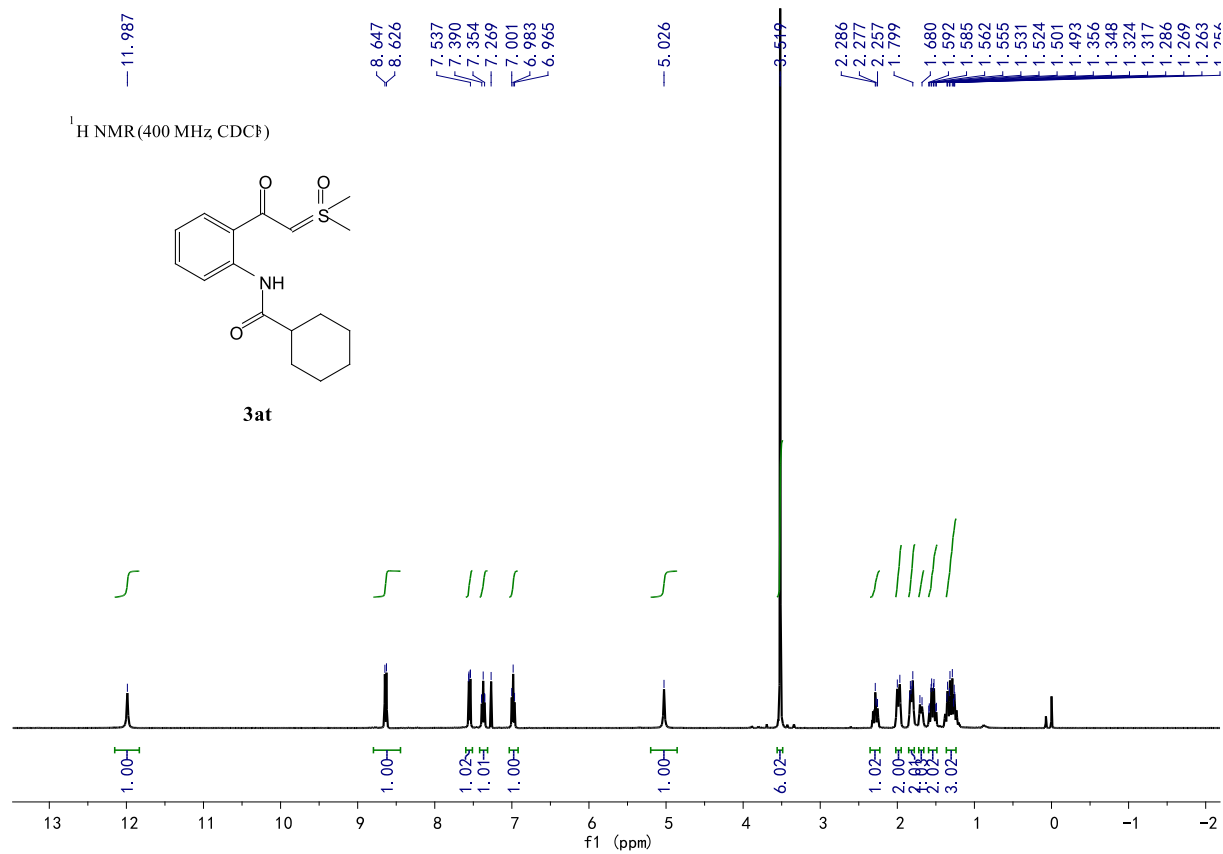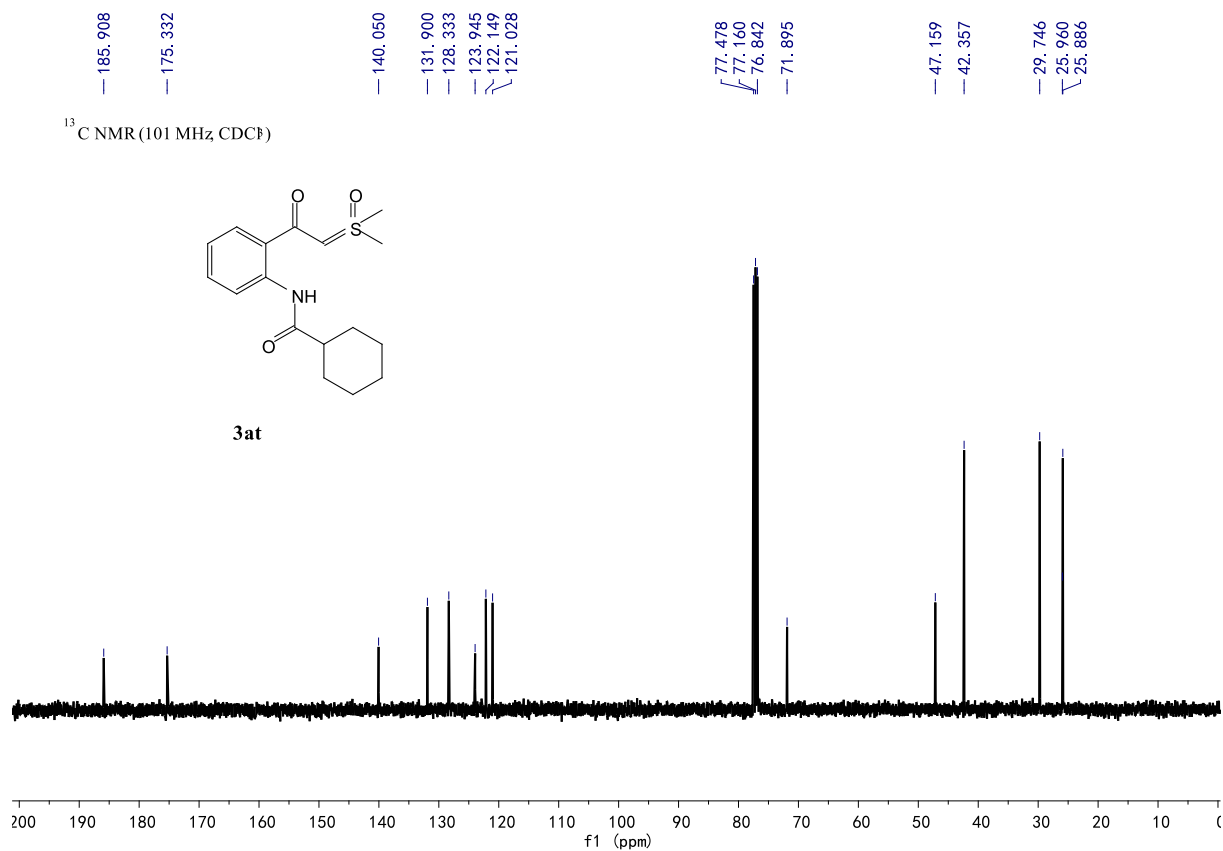

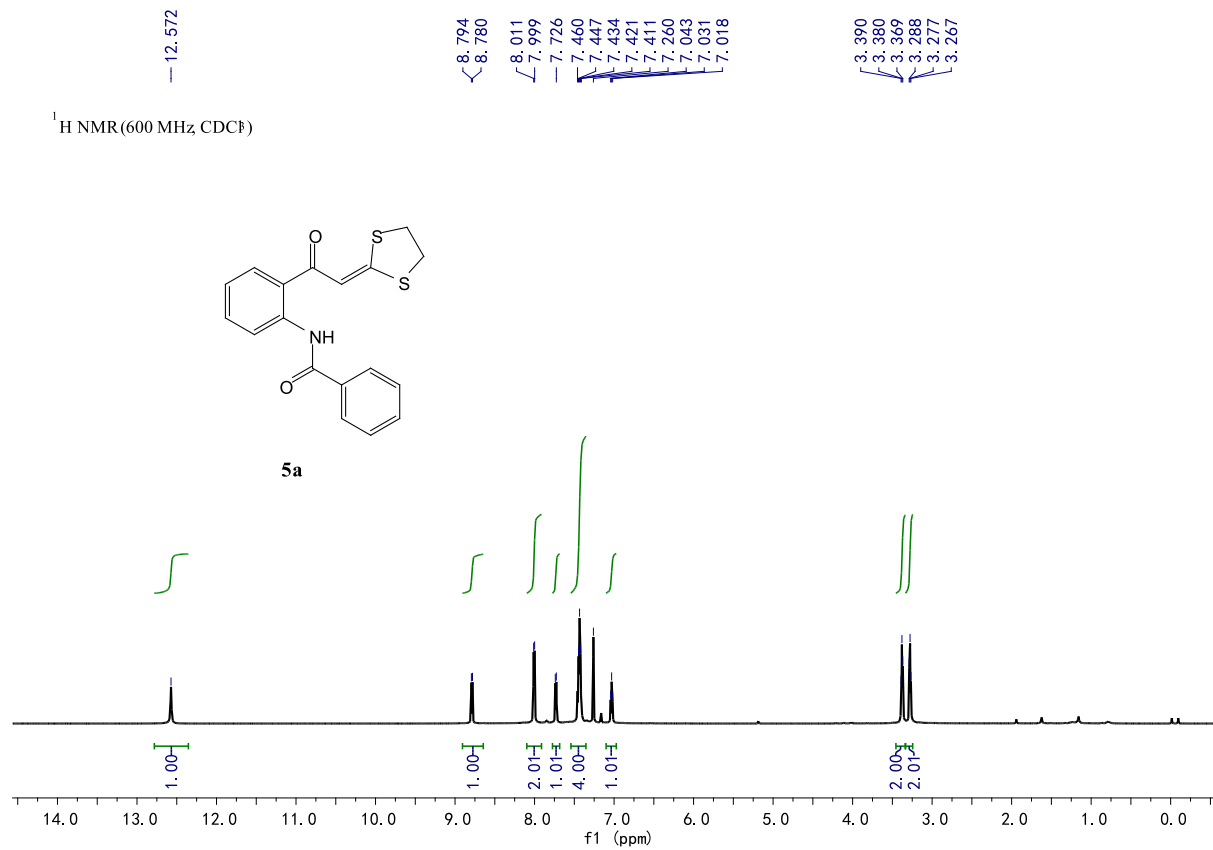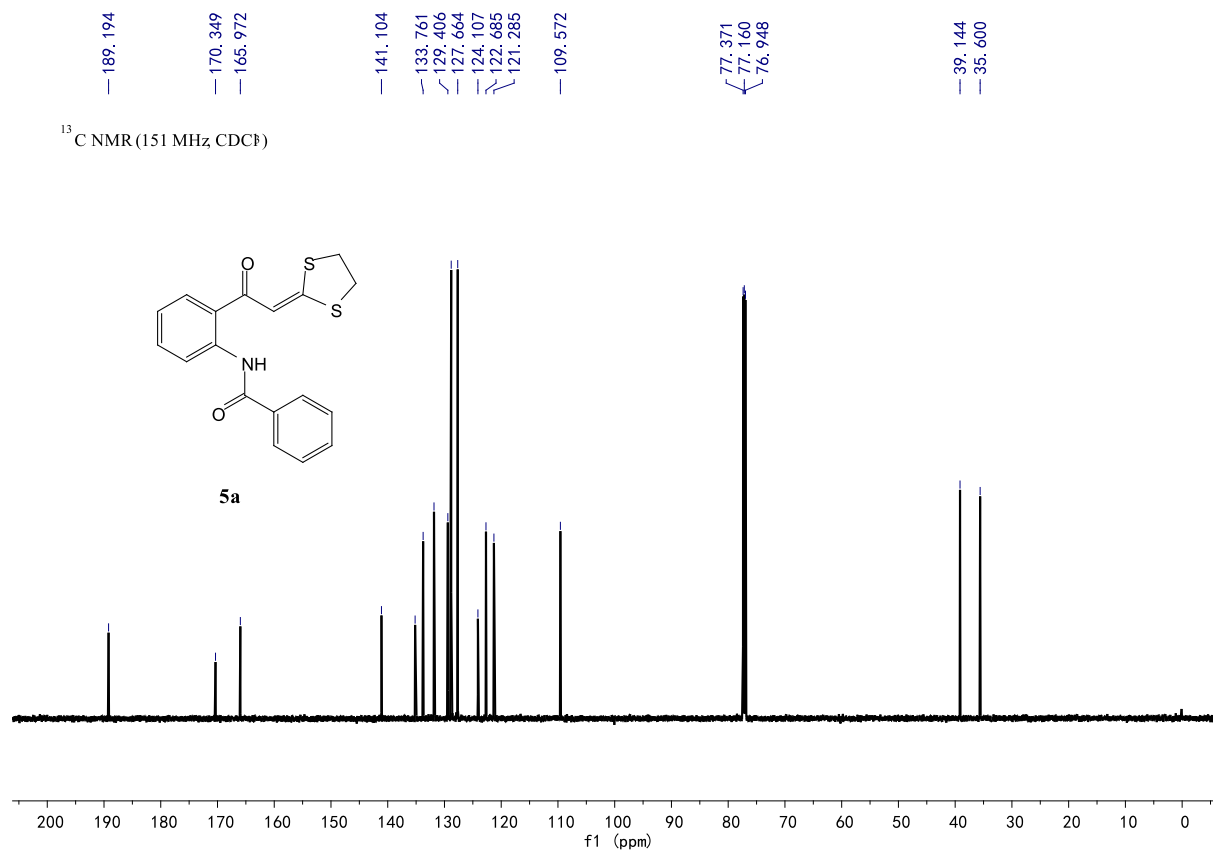

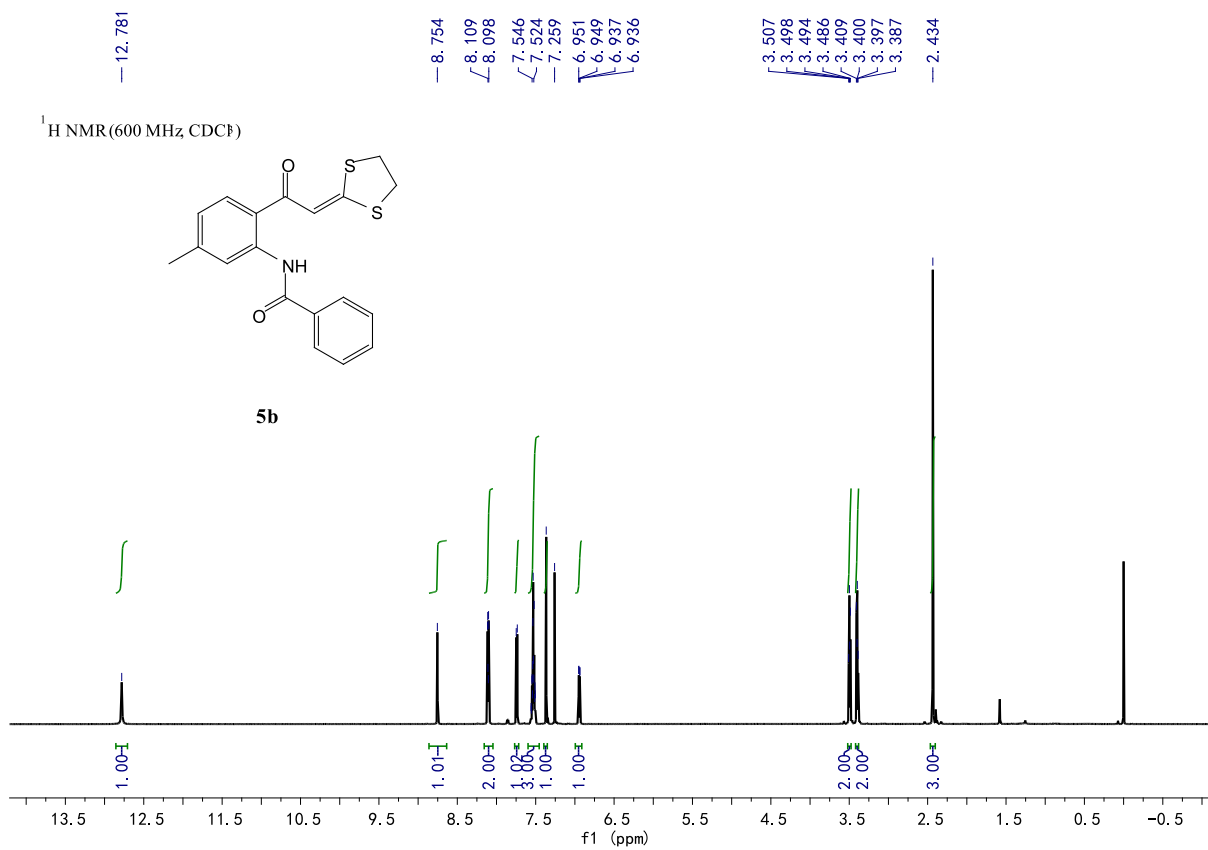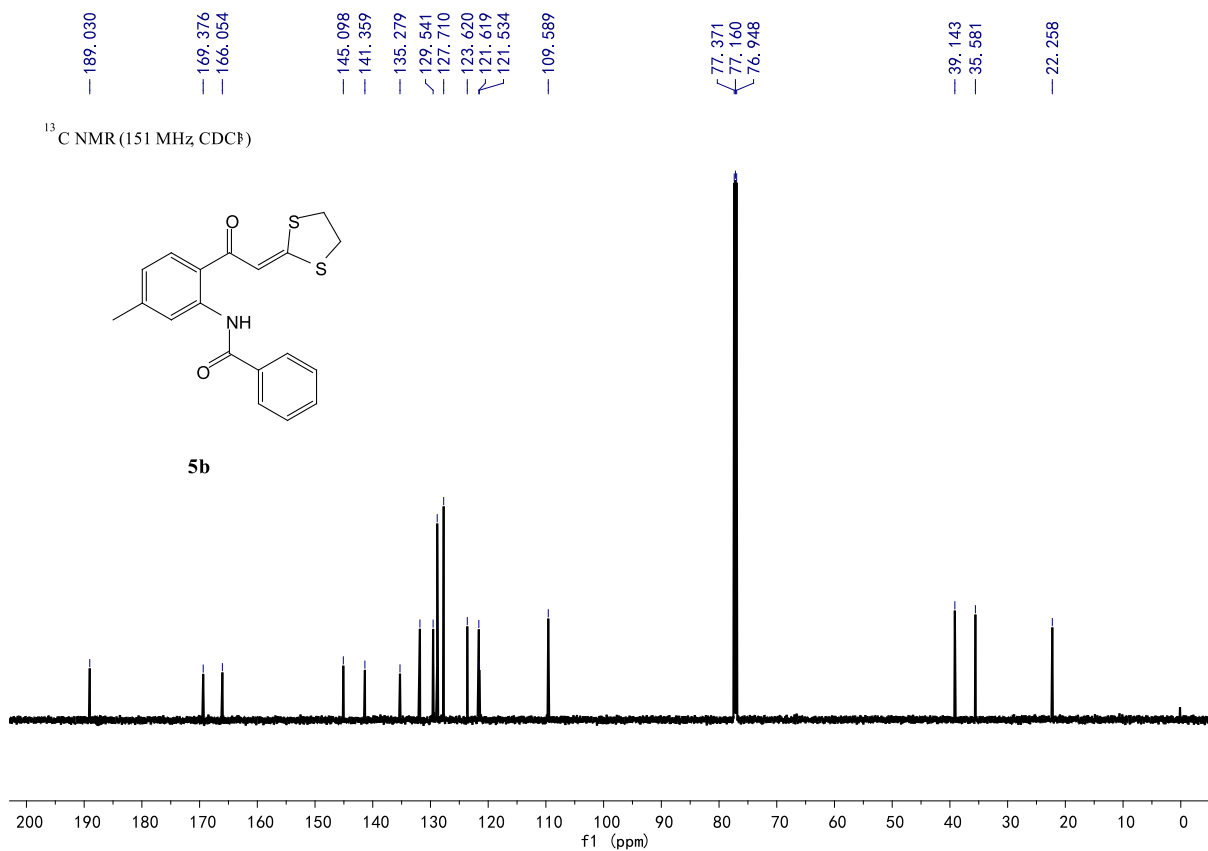

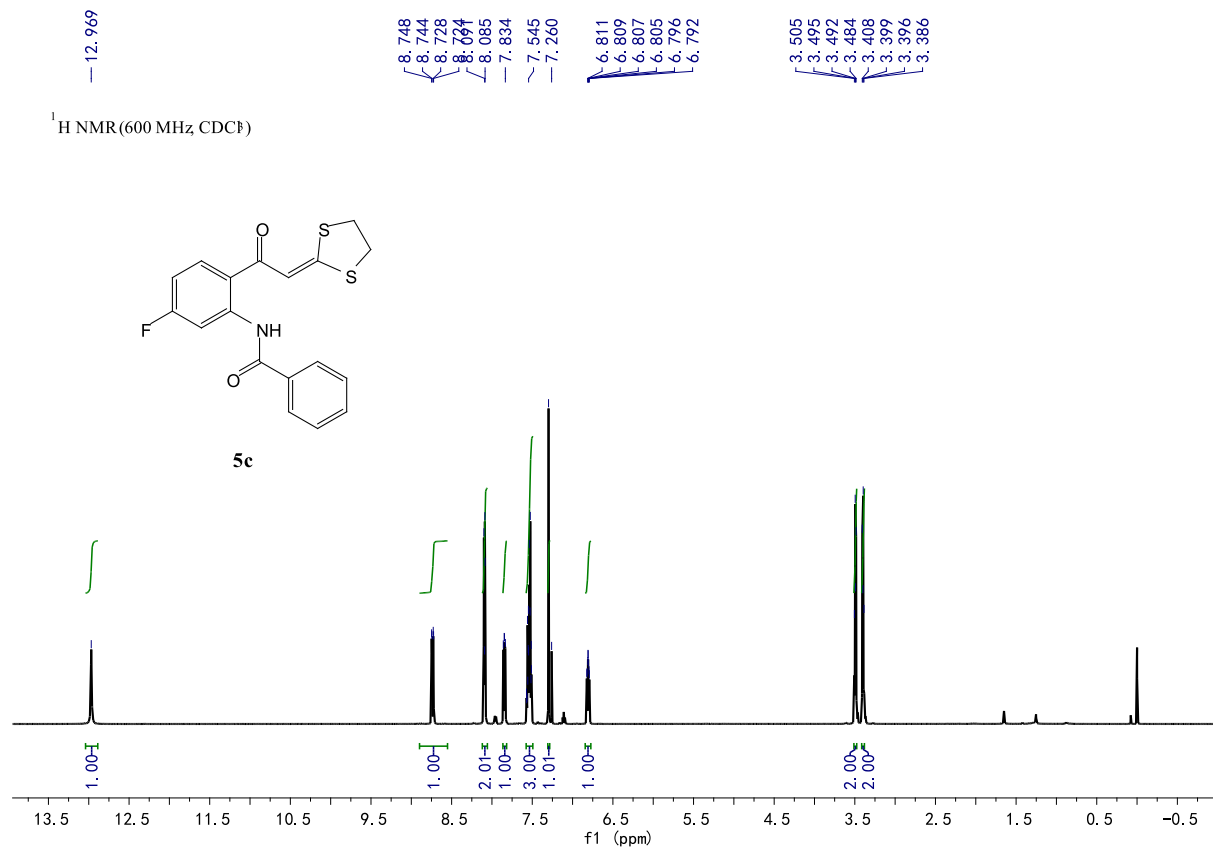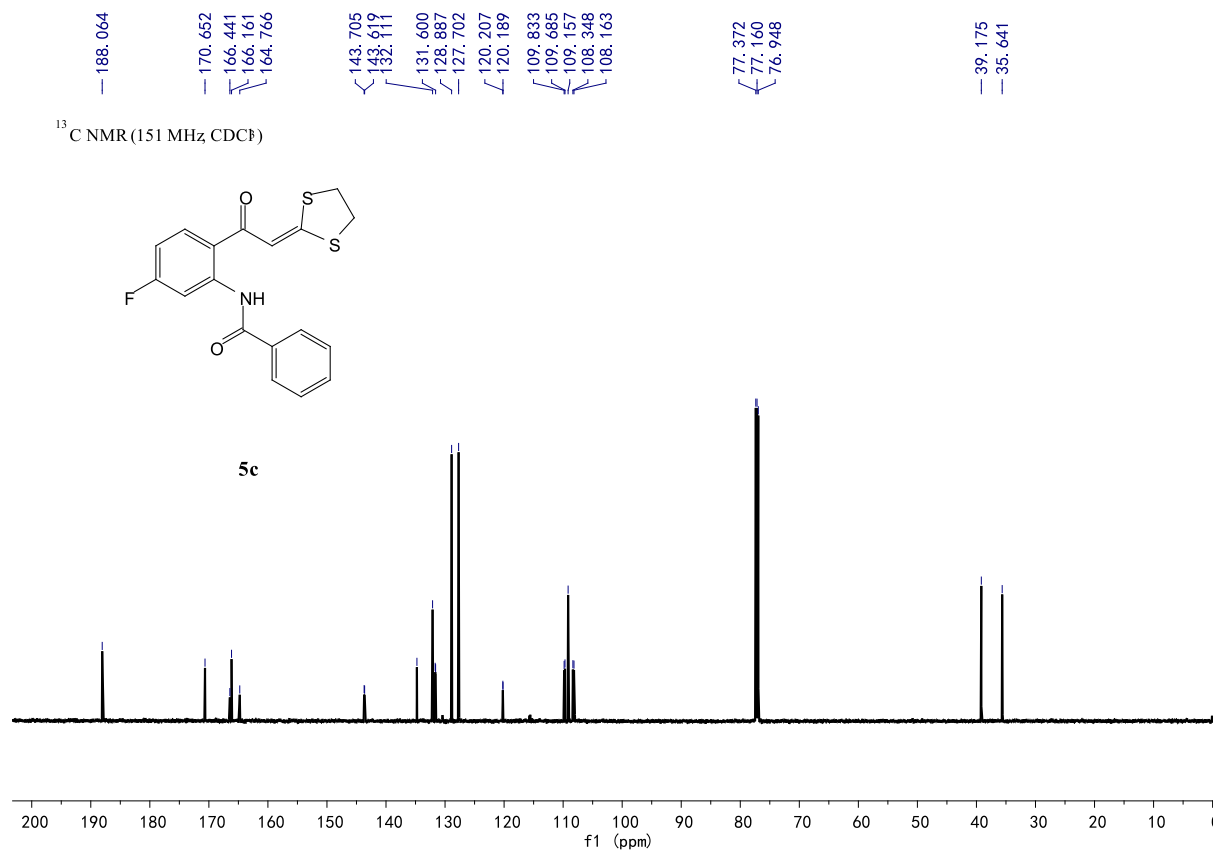

<sup>19</sup>F NMR (565 MHz CDCl<sub>3</sub>)

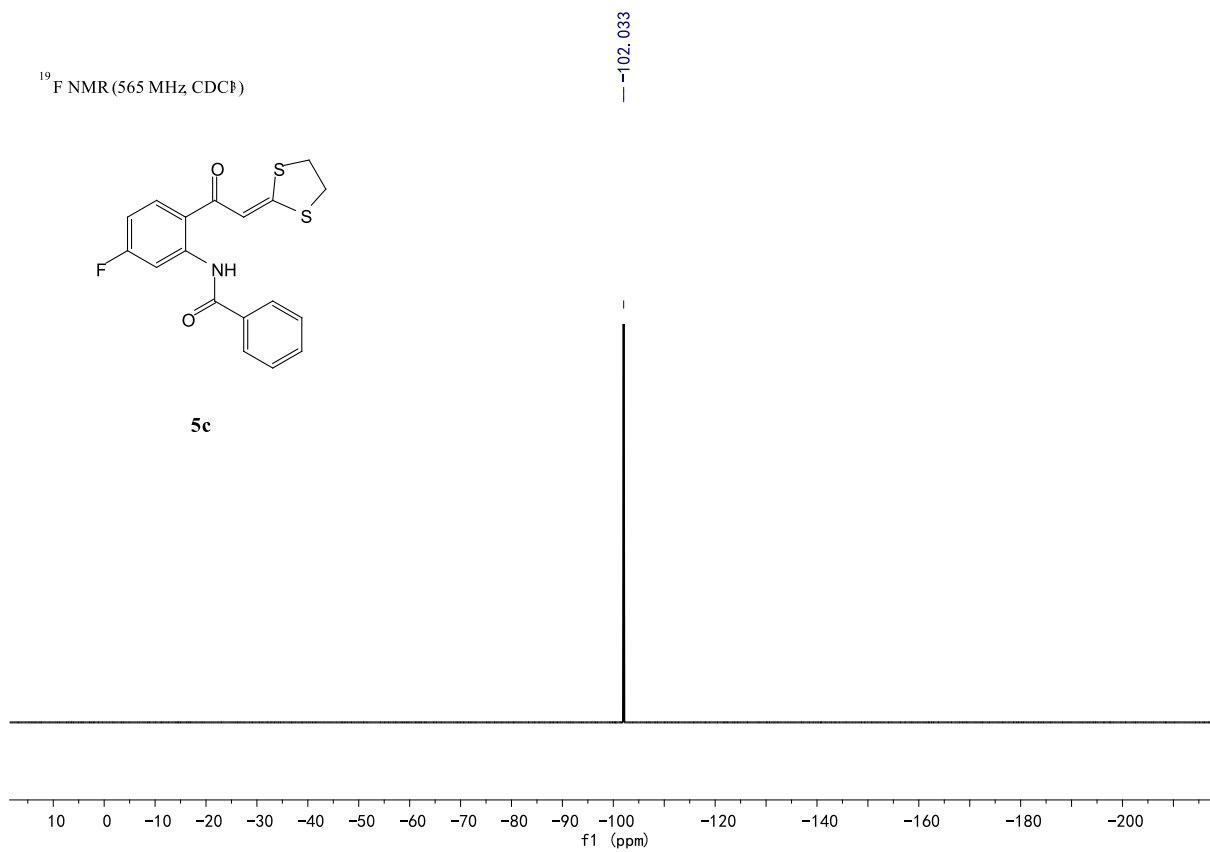

<sup>1</sup>H NMR (600 MHz CDCl<sub>3</sub>)

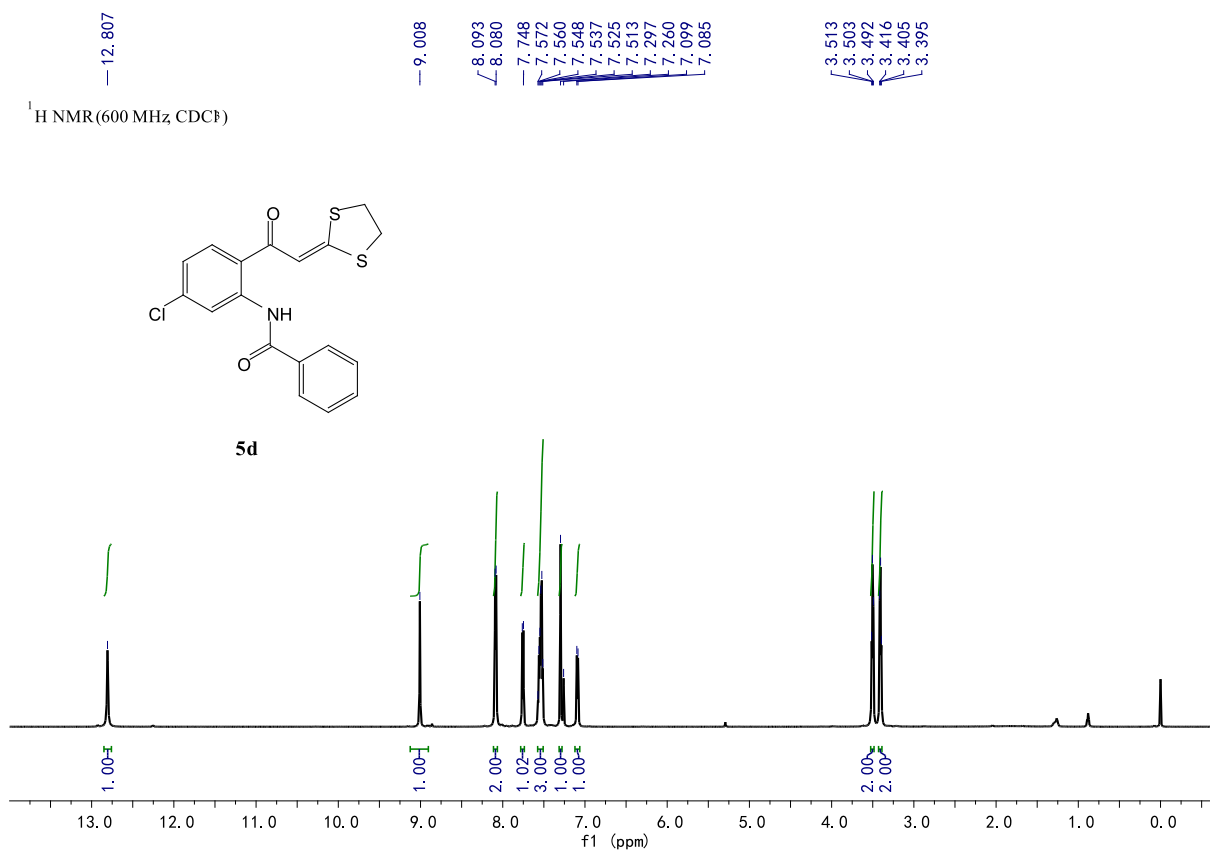

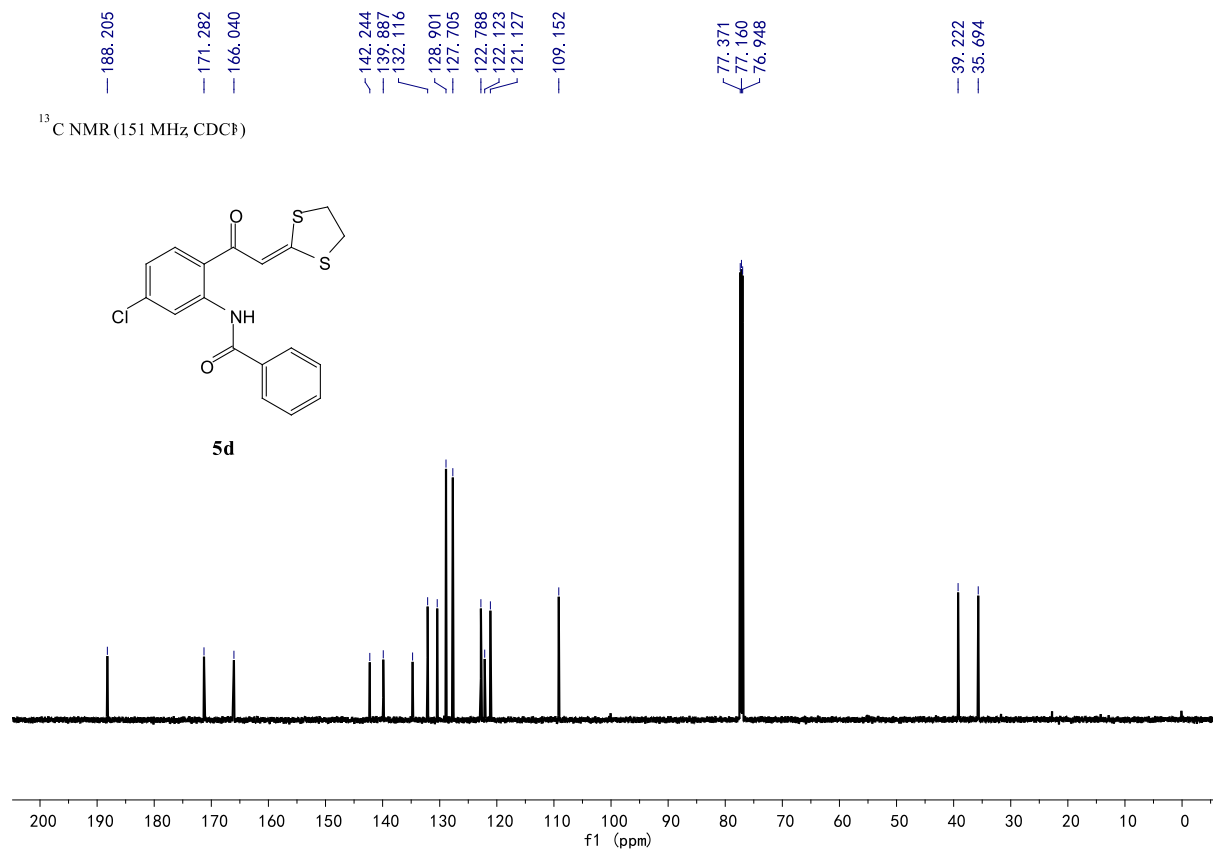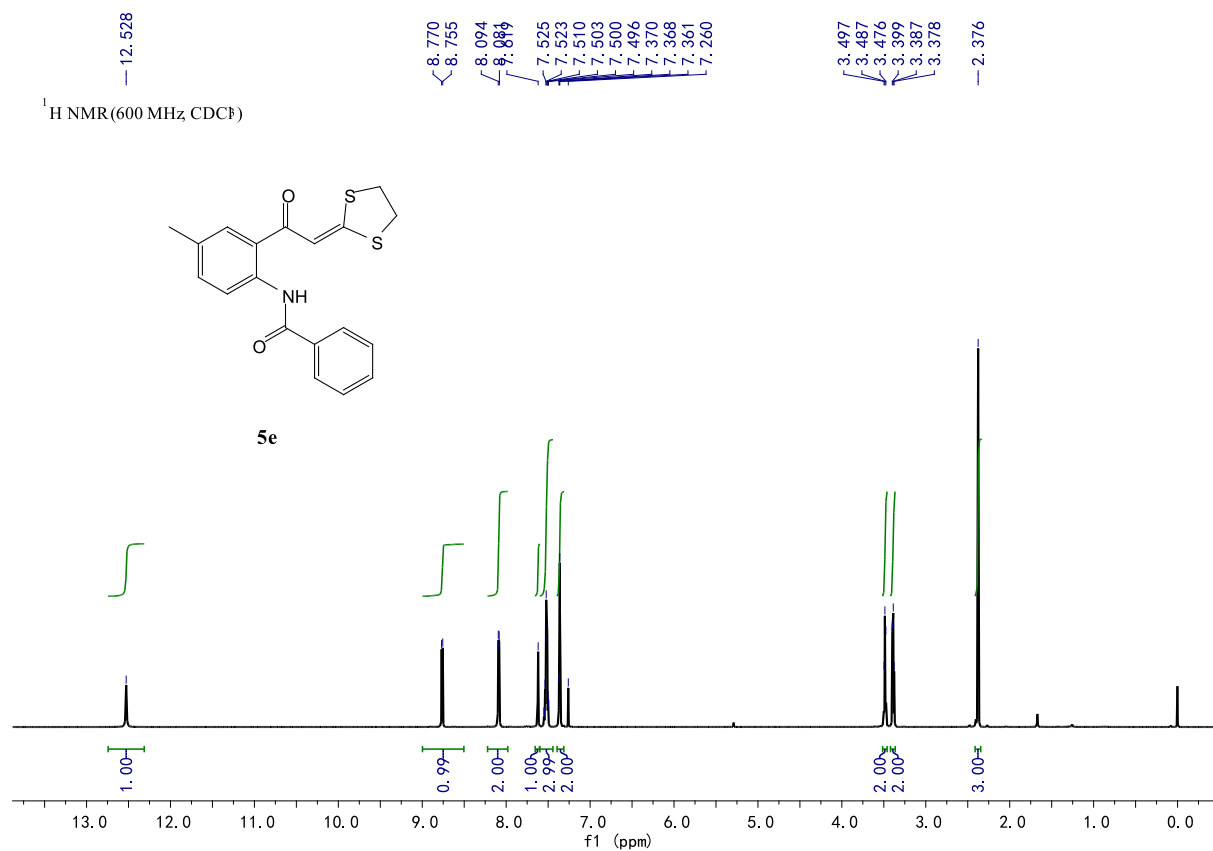

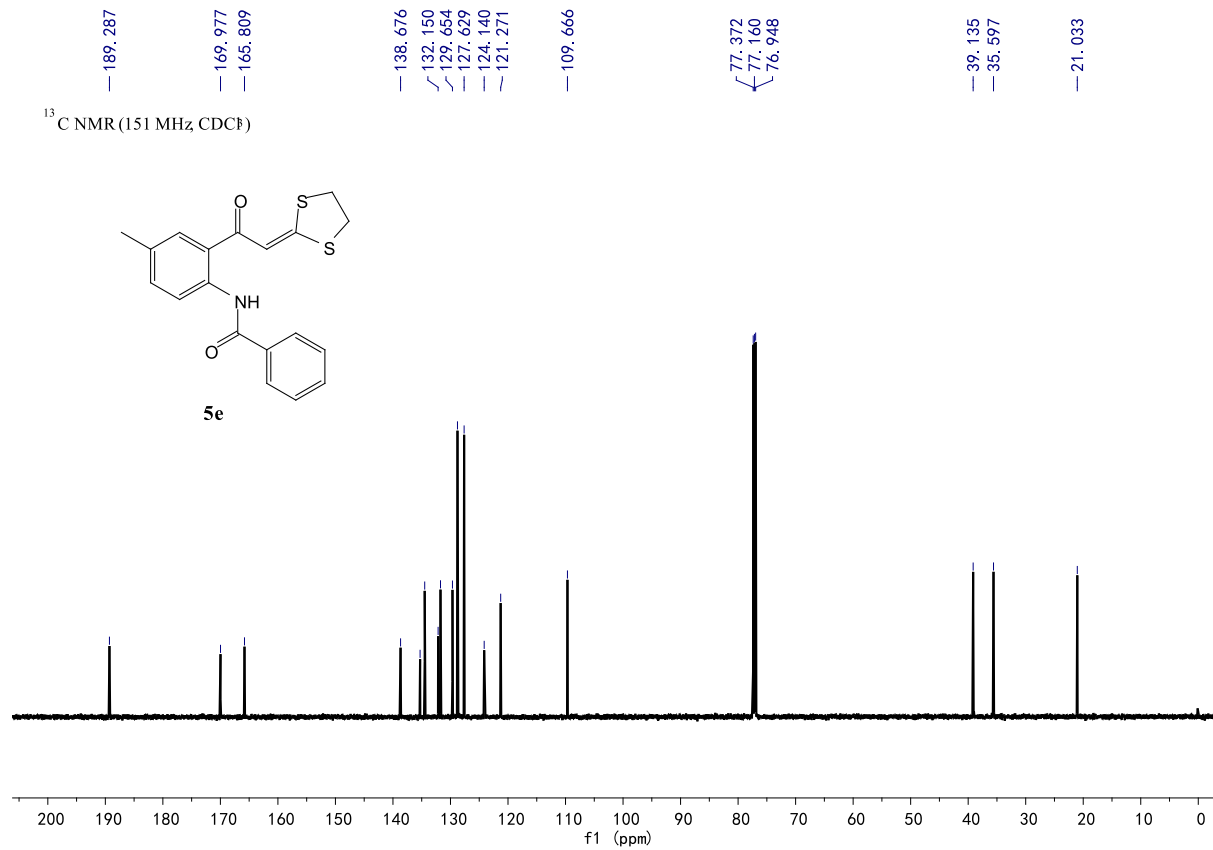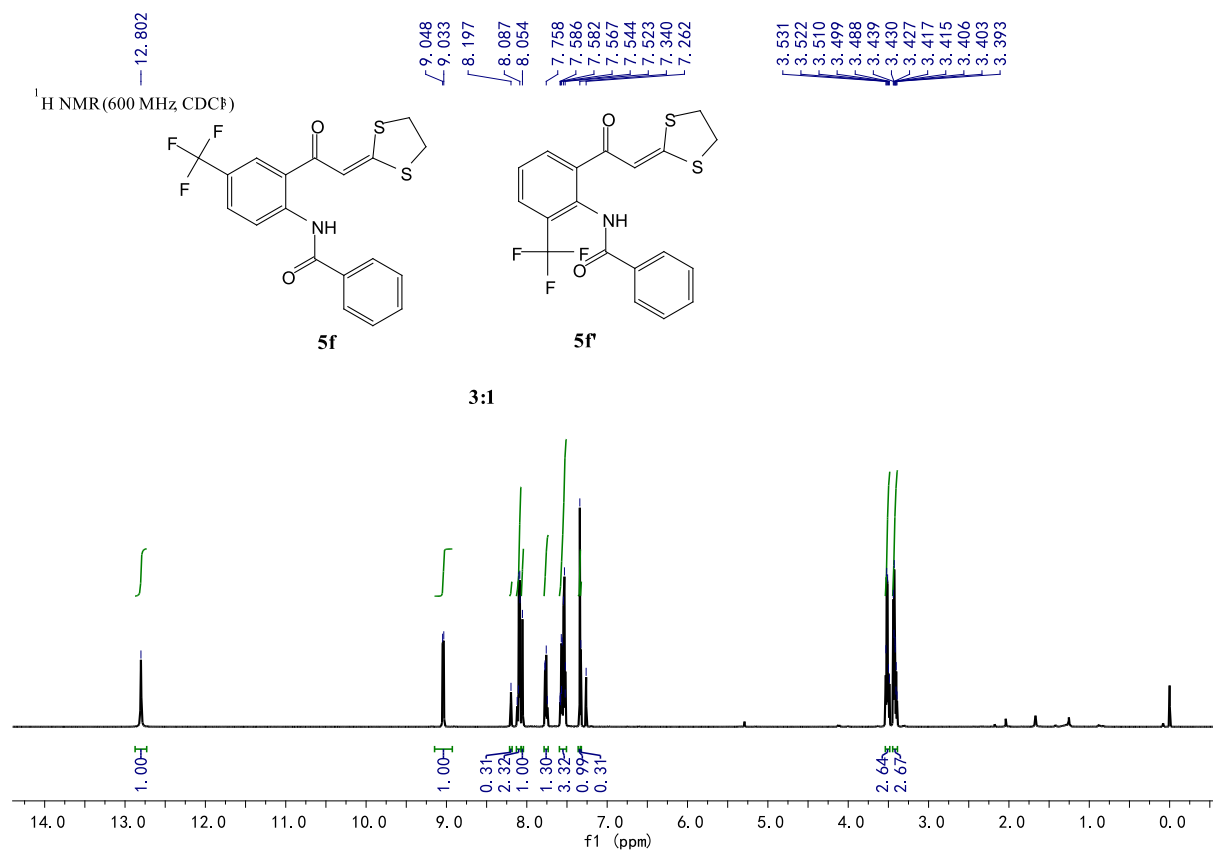



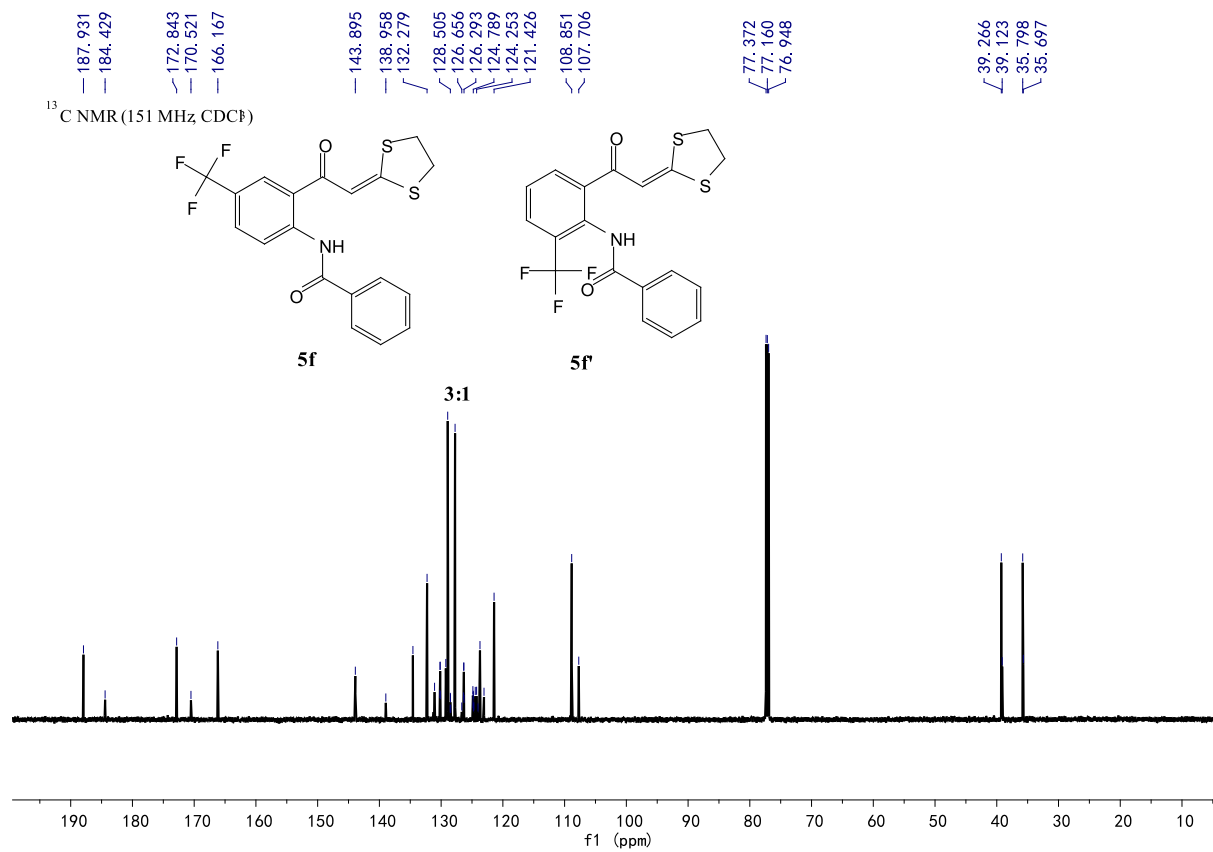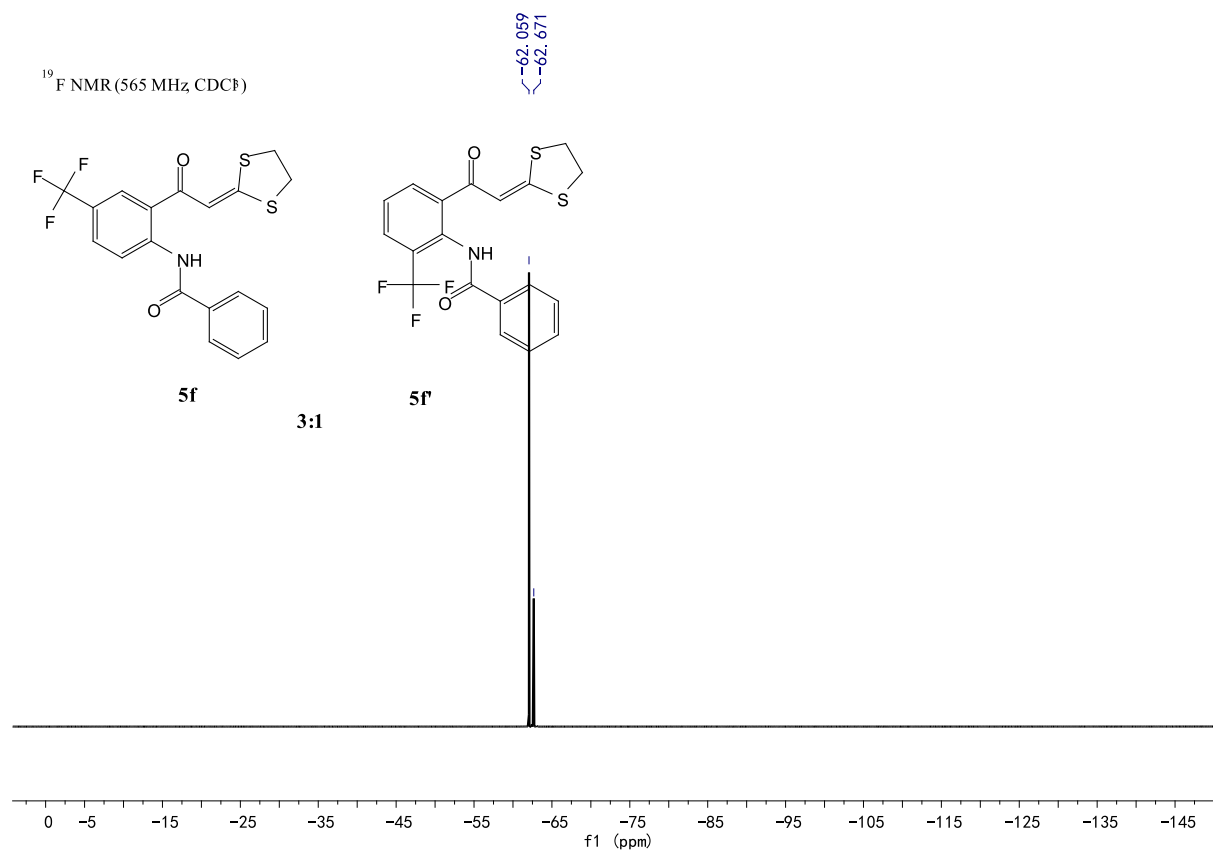

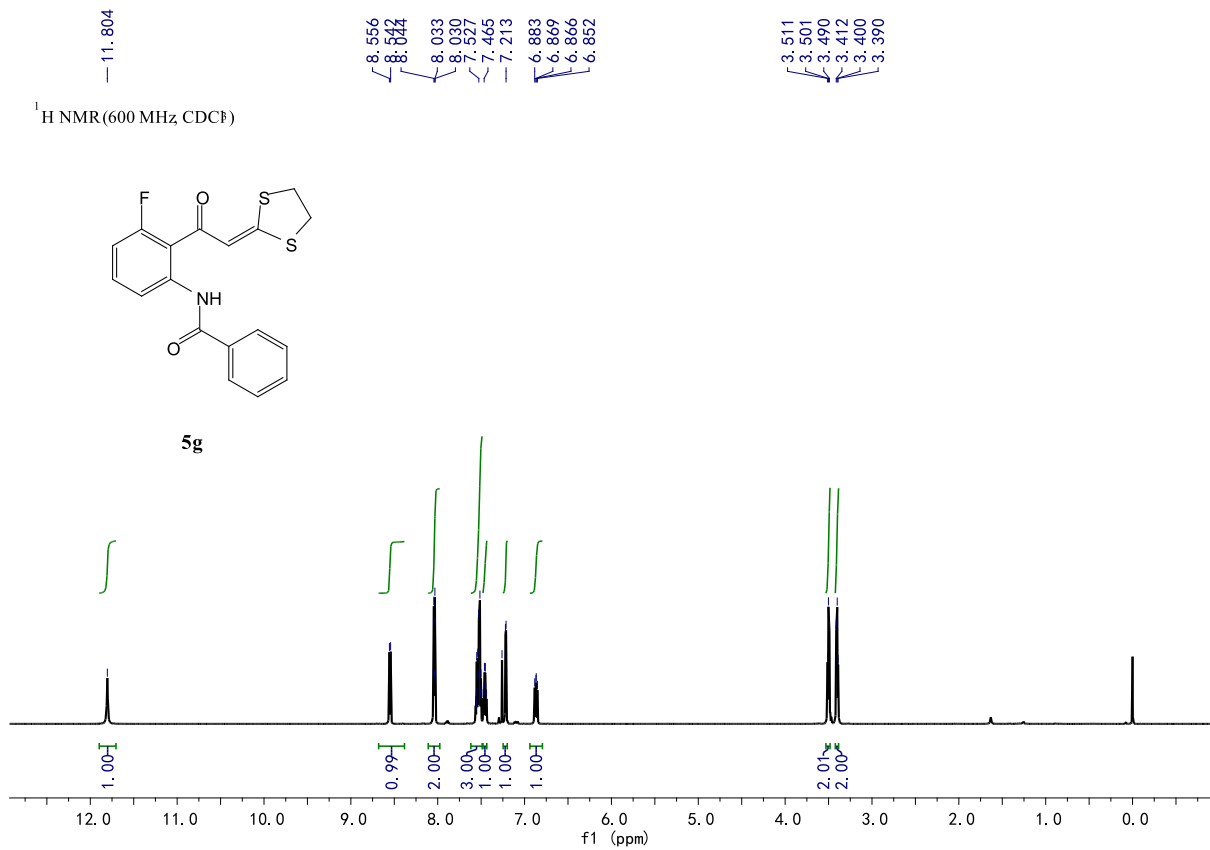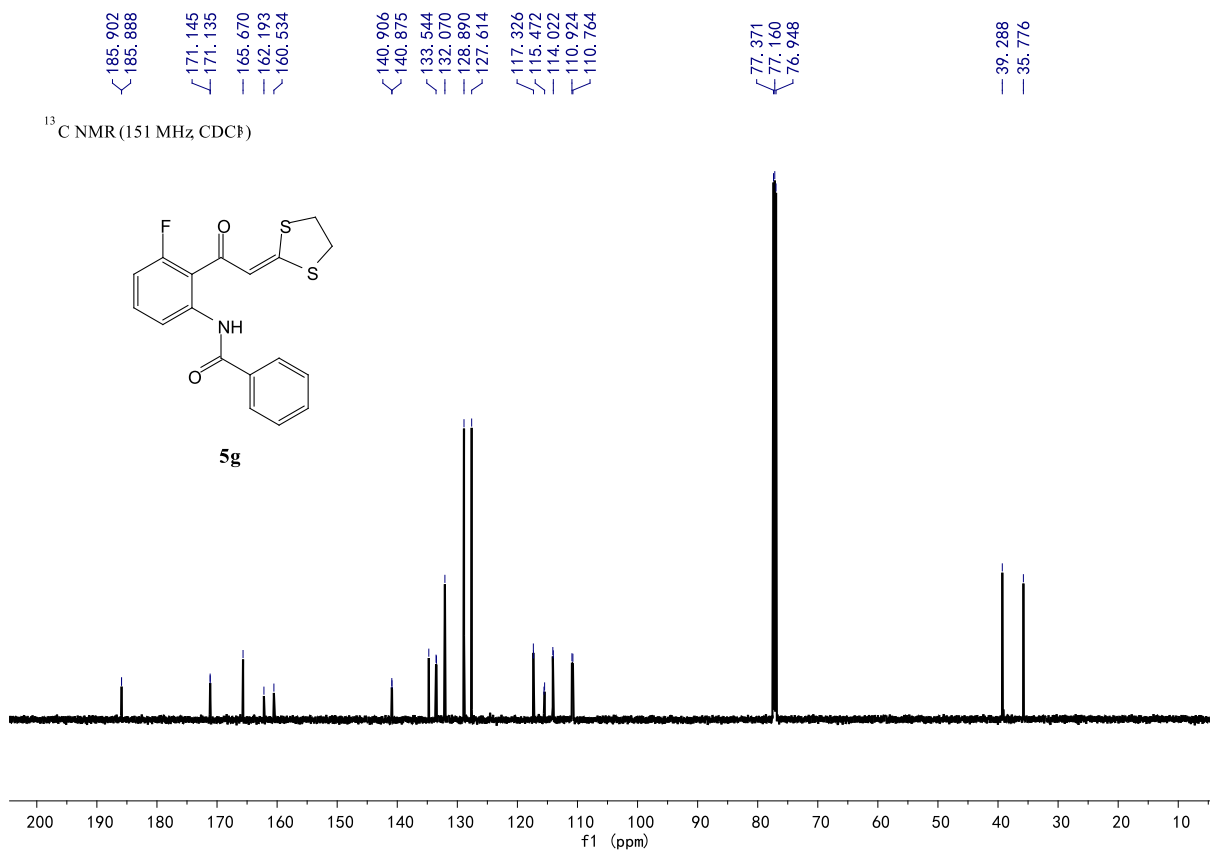

<sup>19</sup>F NMR (376 MHz, CDCl<sub>3</sub>)

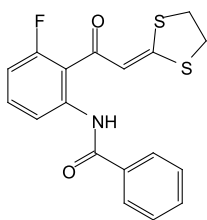

5g

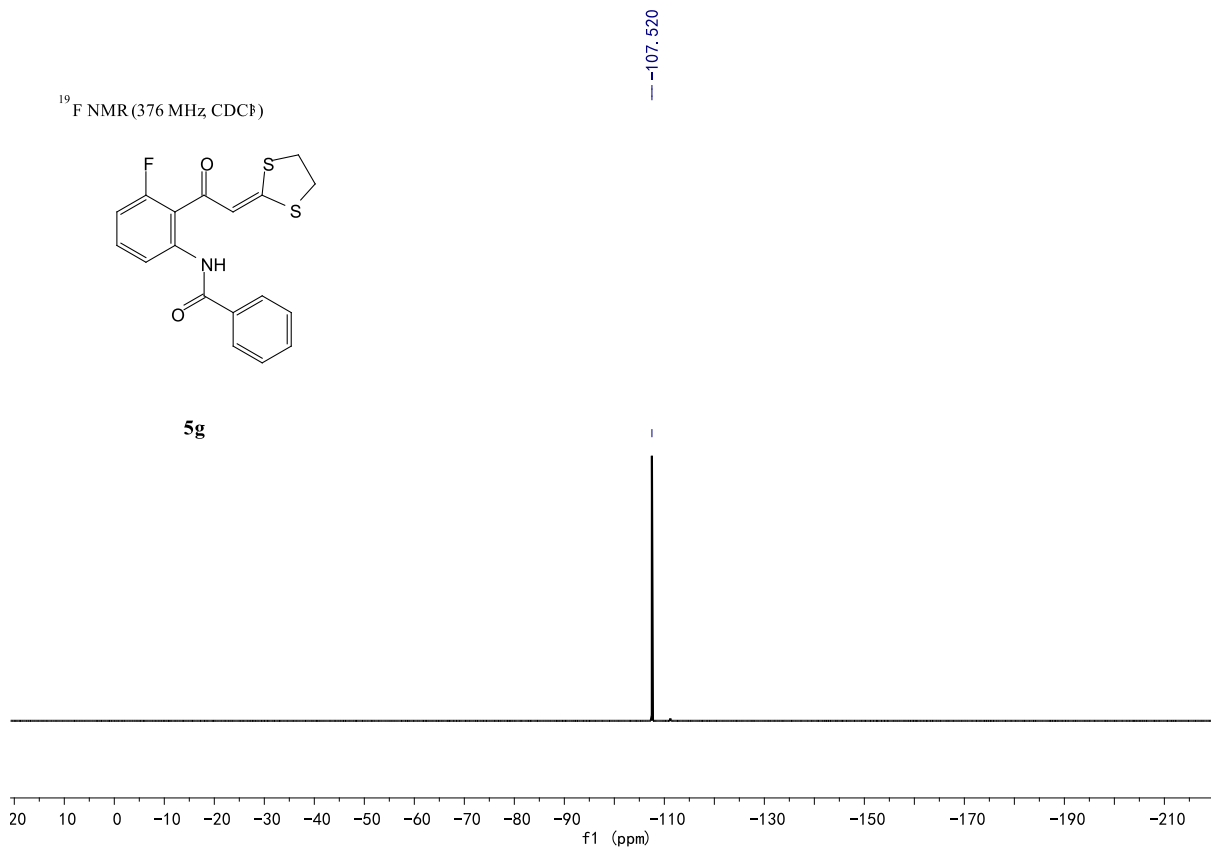

<sup>1</sup>H NMR (600 MHz, CDCl<sub>3</sub>)

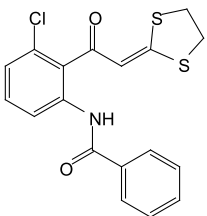

5h

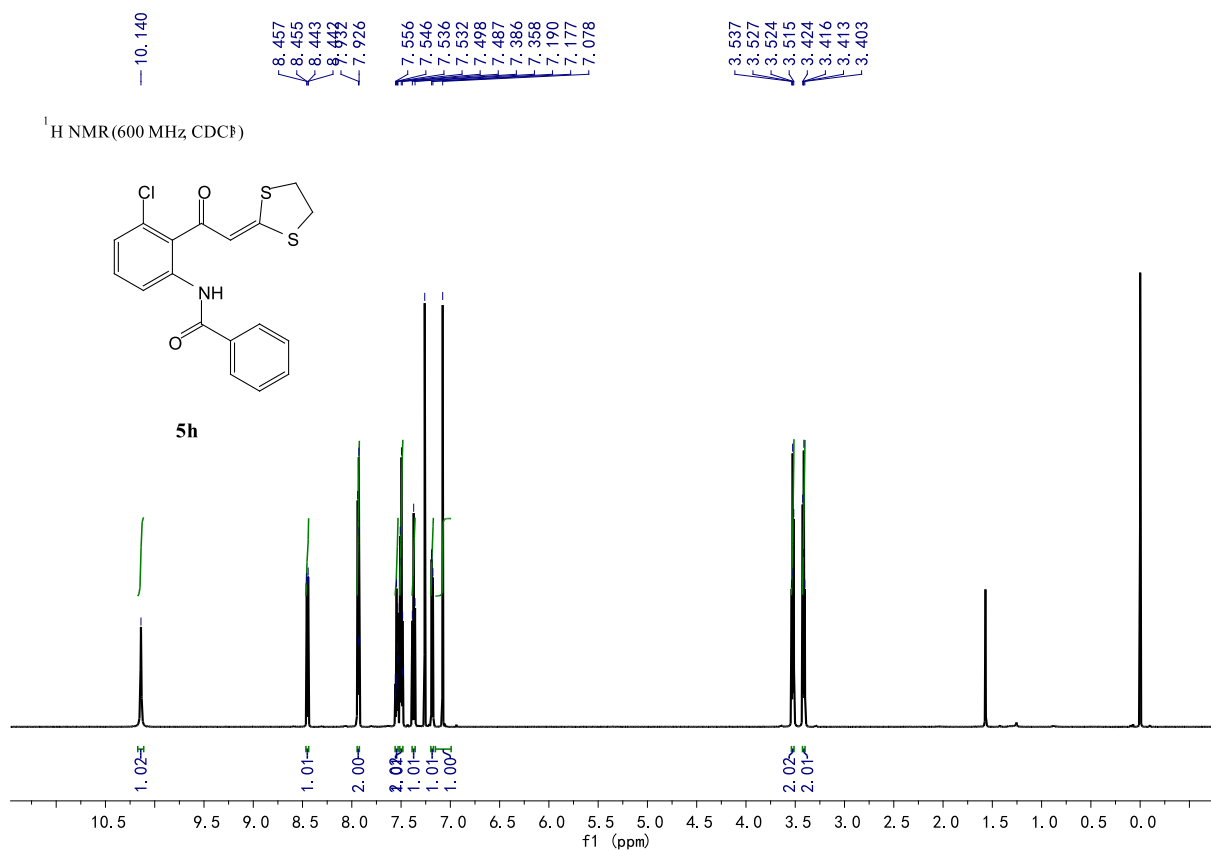

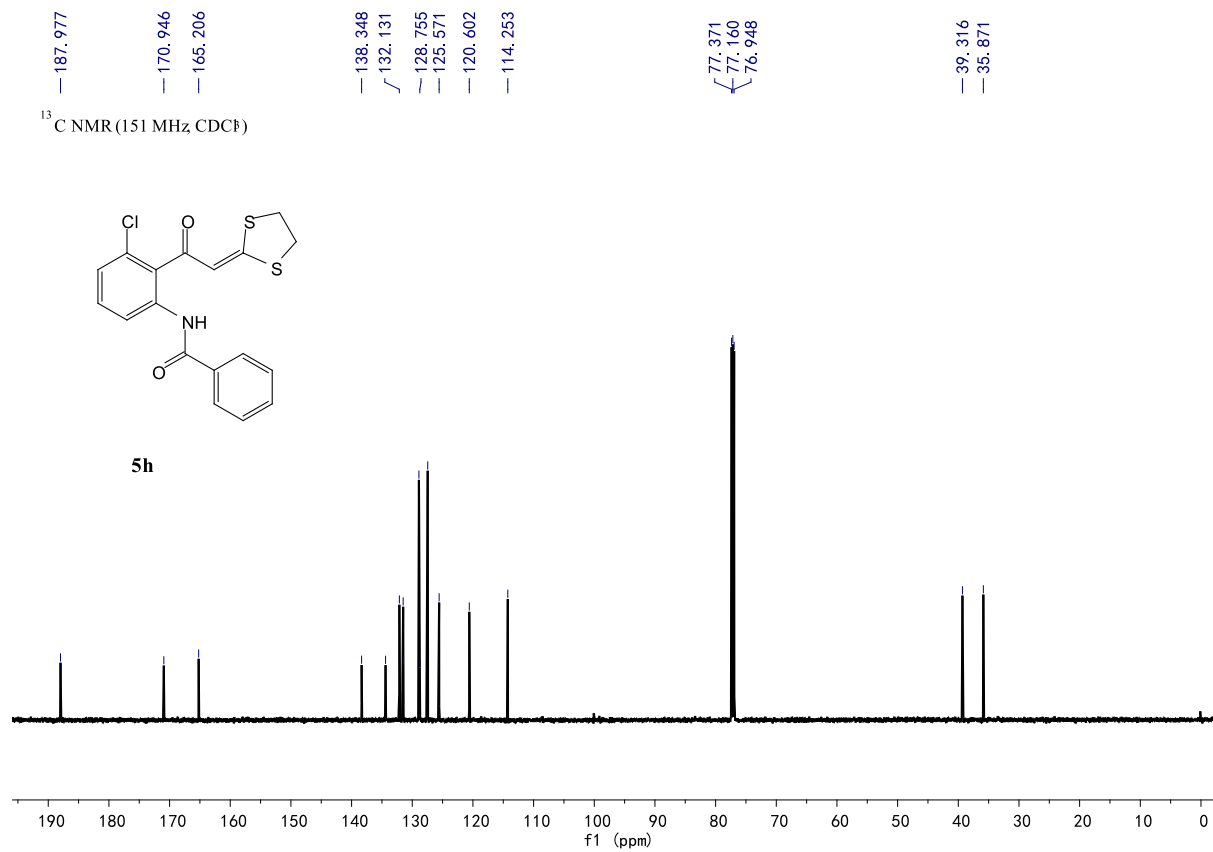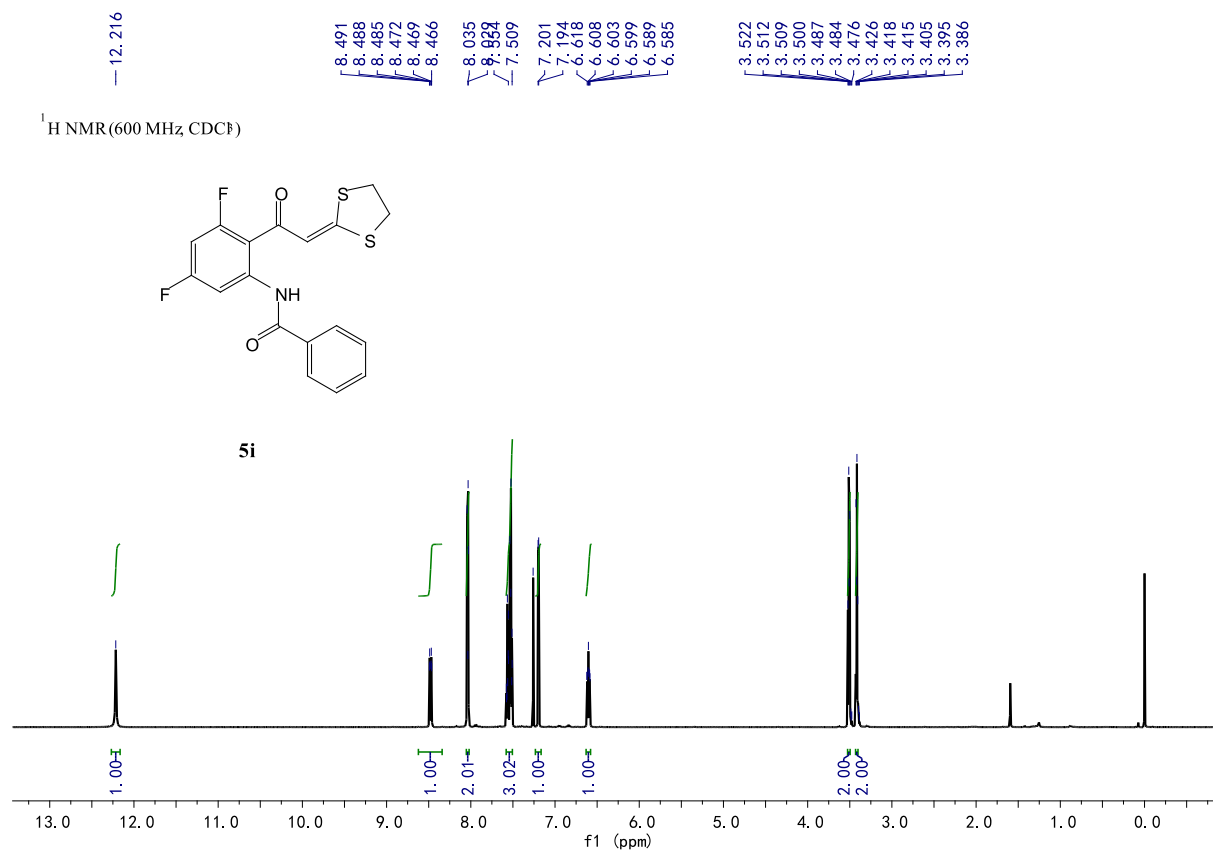

$^{13}\text{C}$  NMR (151 MHz  $\text{CDCl}_3$ )  
 185.062, 185.042, 171.742, 171.731, 165.752, 164.081, 163.193, 161.523, 142.935, 142.887, 142.835, 142.789, 134.393, 132.313, 127.646, 113.647, 111.513, 111.488, 111.410, 104.984, 104.570, 99.445, 99.271, 99.255, 99.082, 77.371, 77.160, 76.948, 39.301, 35.797

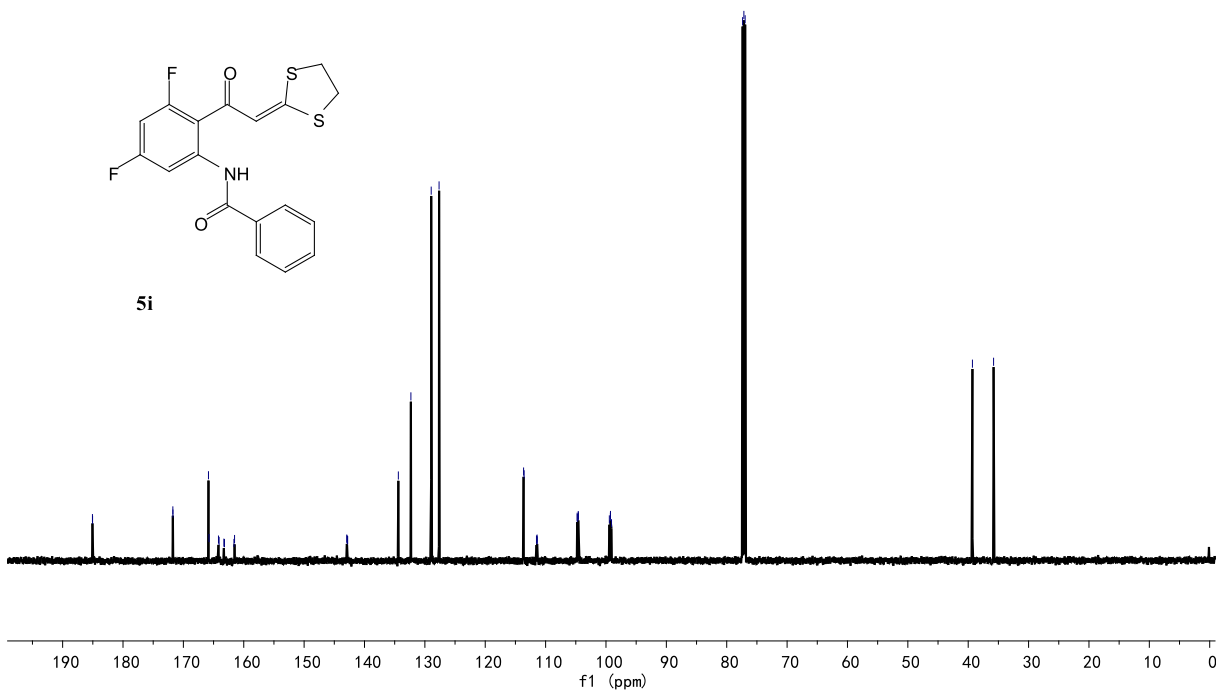

$^{19}\text{F}$  NMR (565 MHz  $\text{CDCl}_3$ )

-101.092, -101.115, -103.125, -103.148

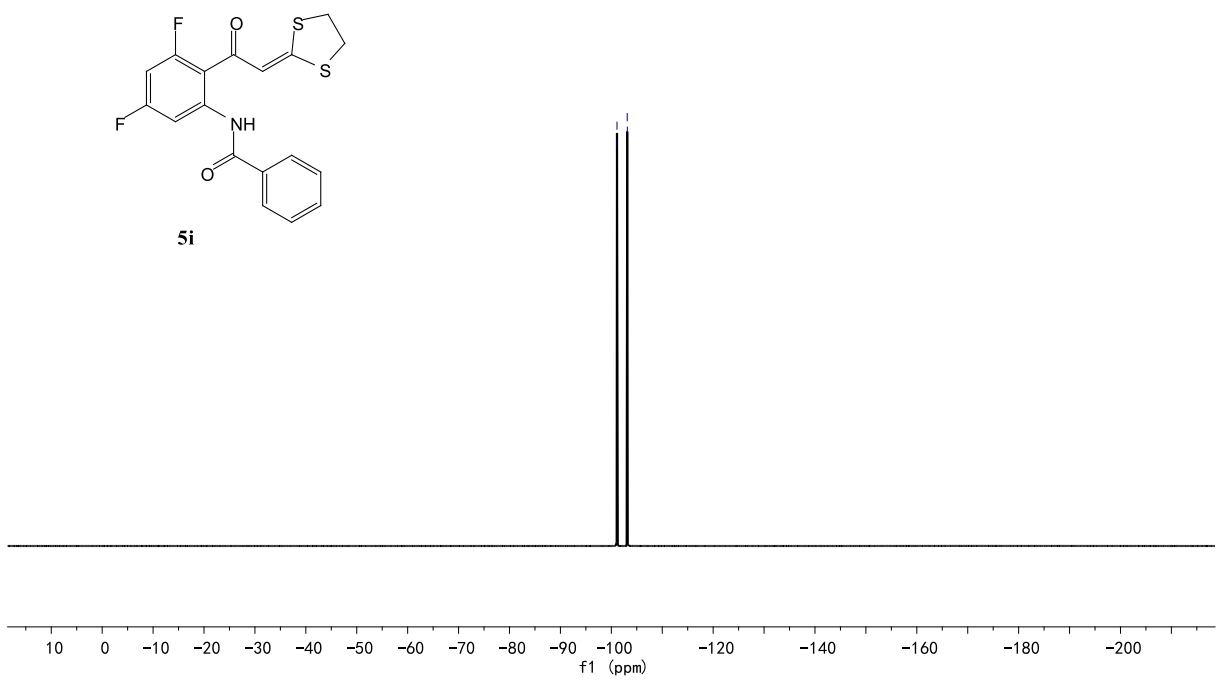

<sup>1</sup>H NMR (600 MHz, CDCl<sub>3</sub>)

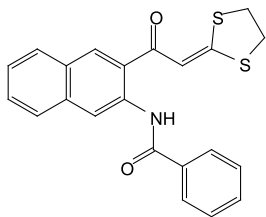

5j

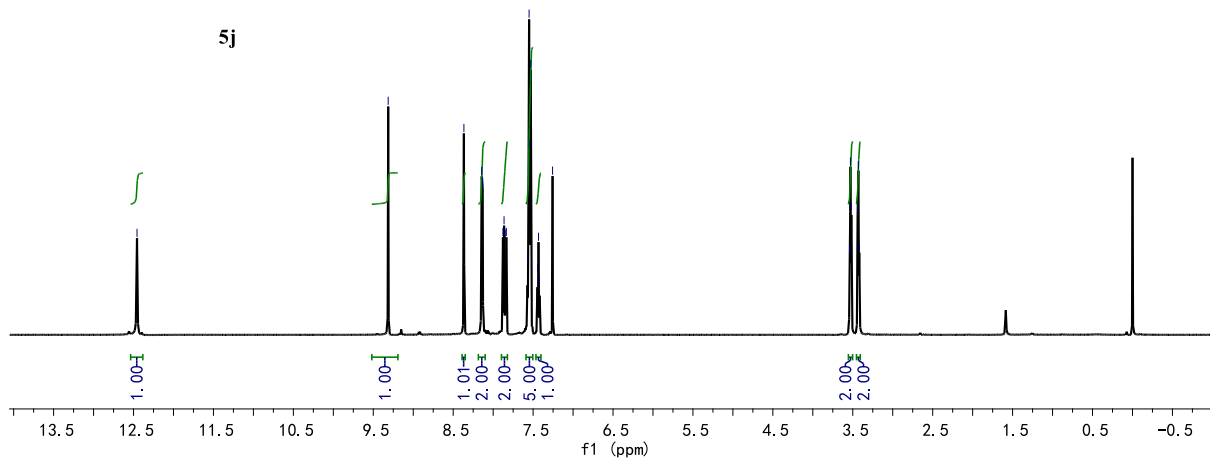

<sup>13</sup>C NMR (151 MHz, CDCl<sub>3</sub>)

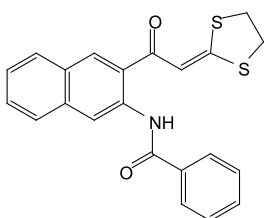

5j

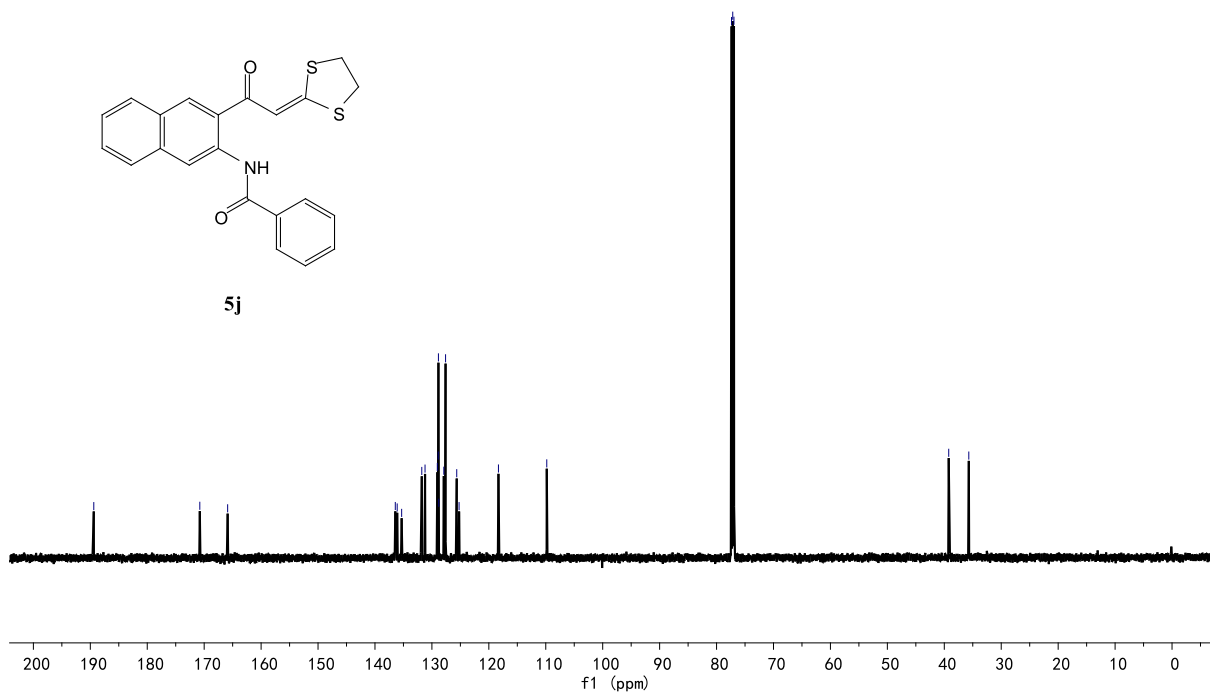

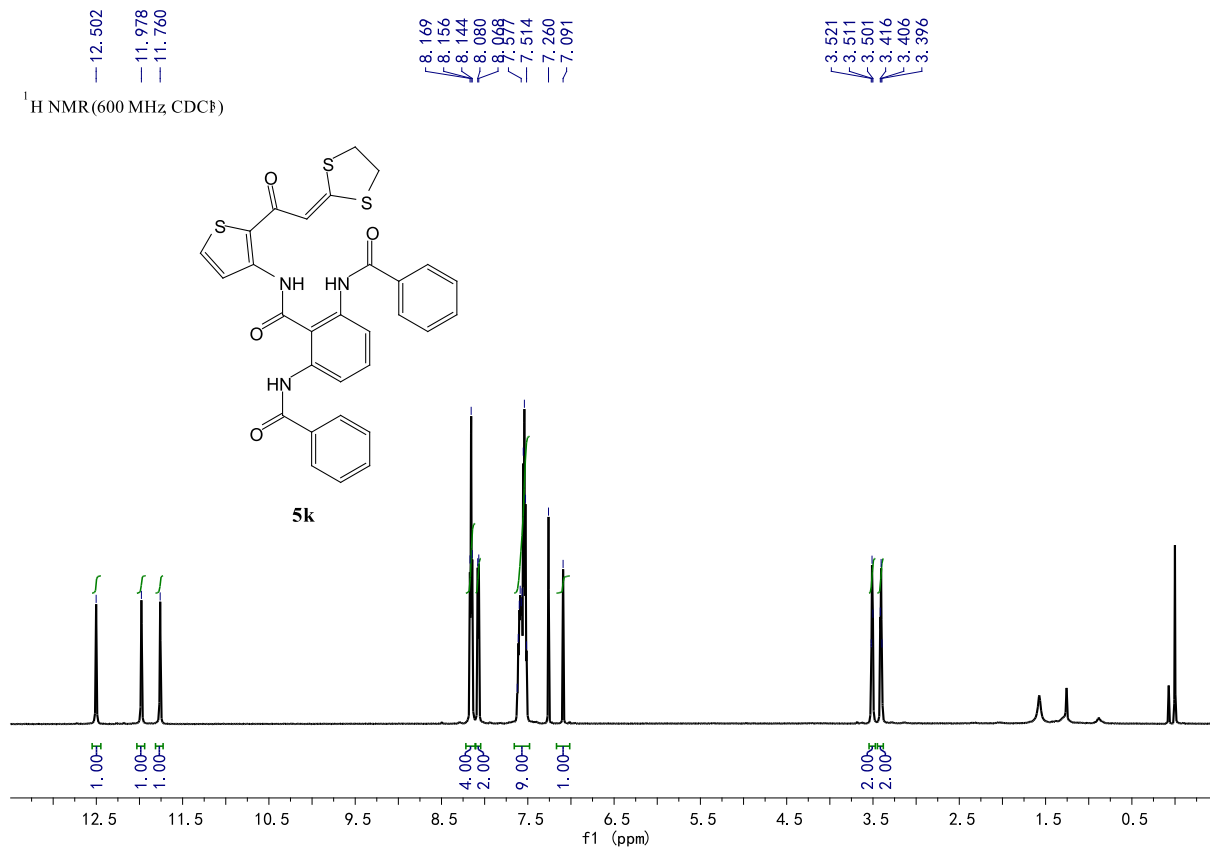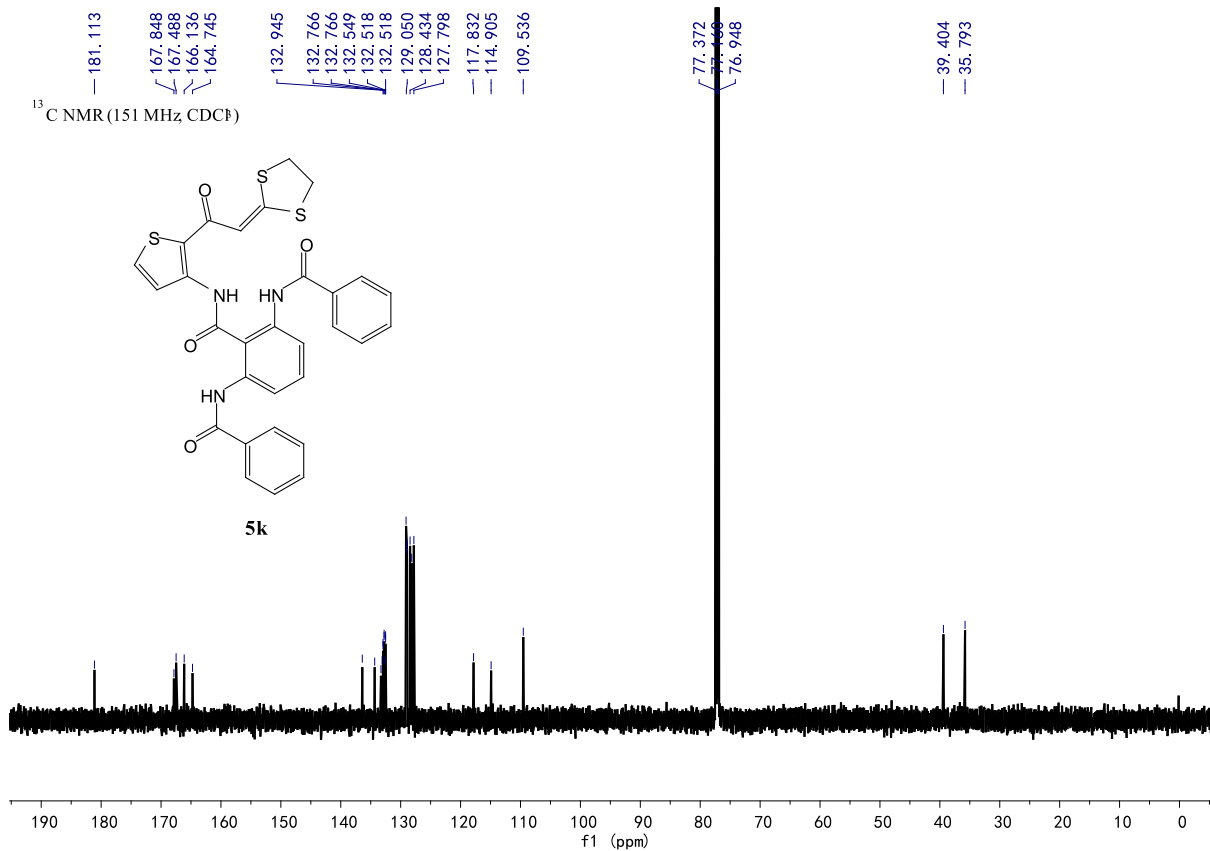

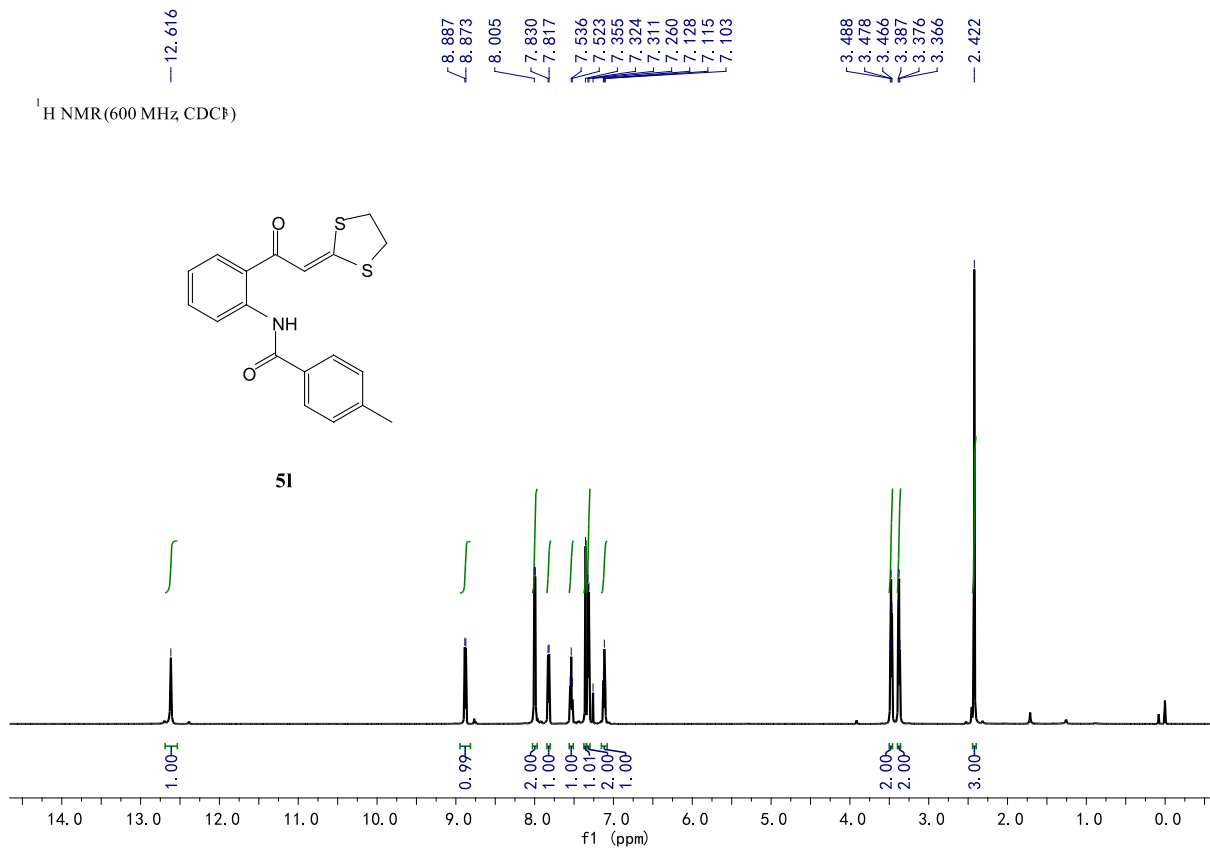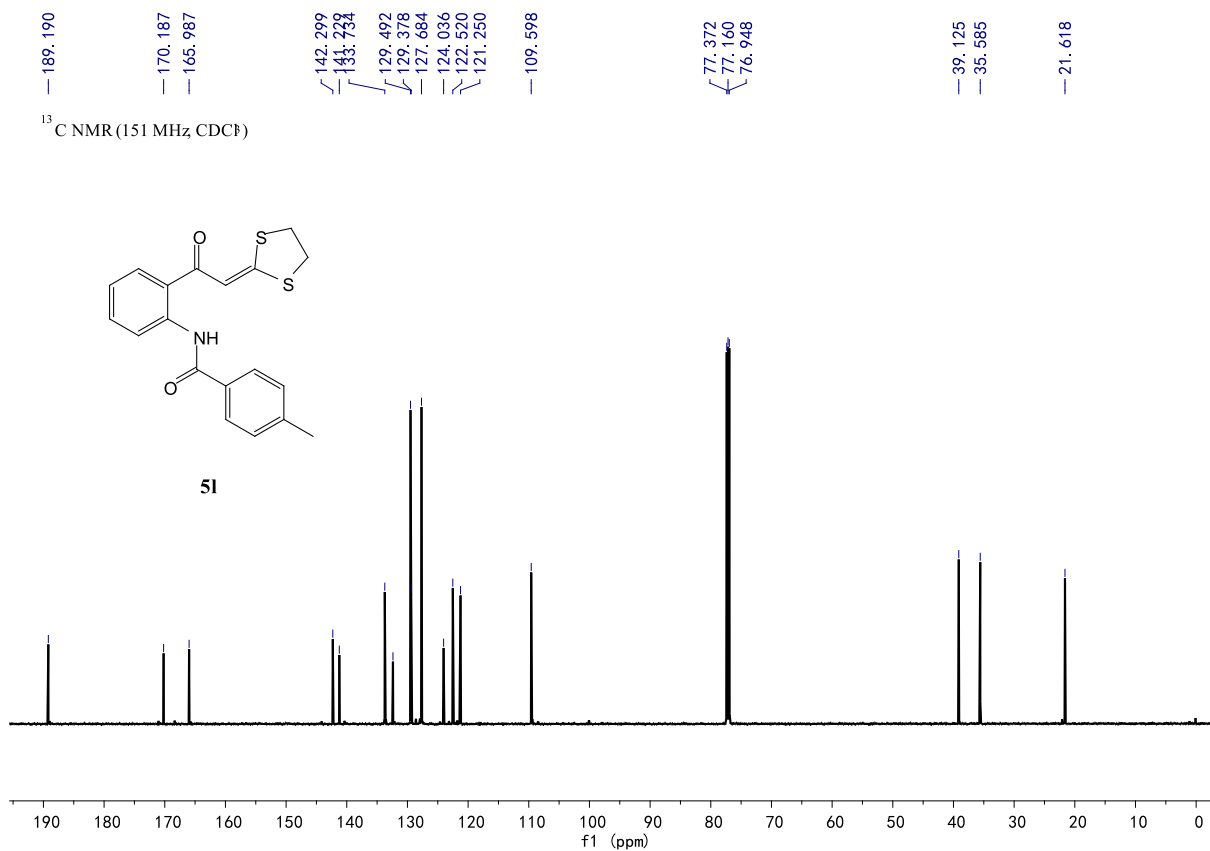



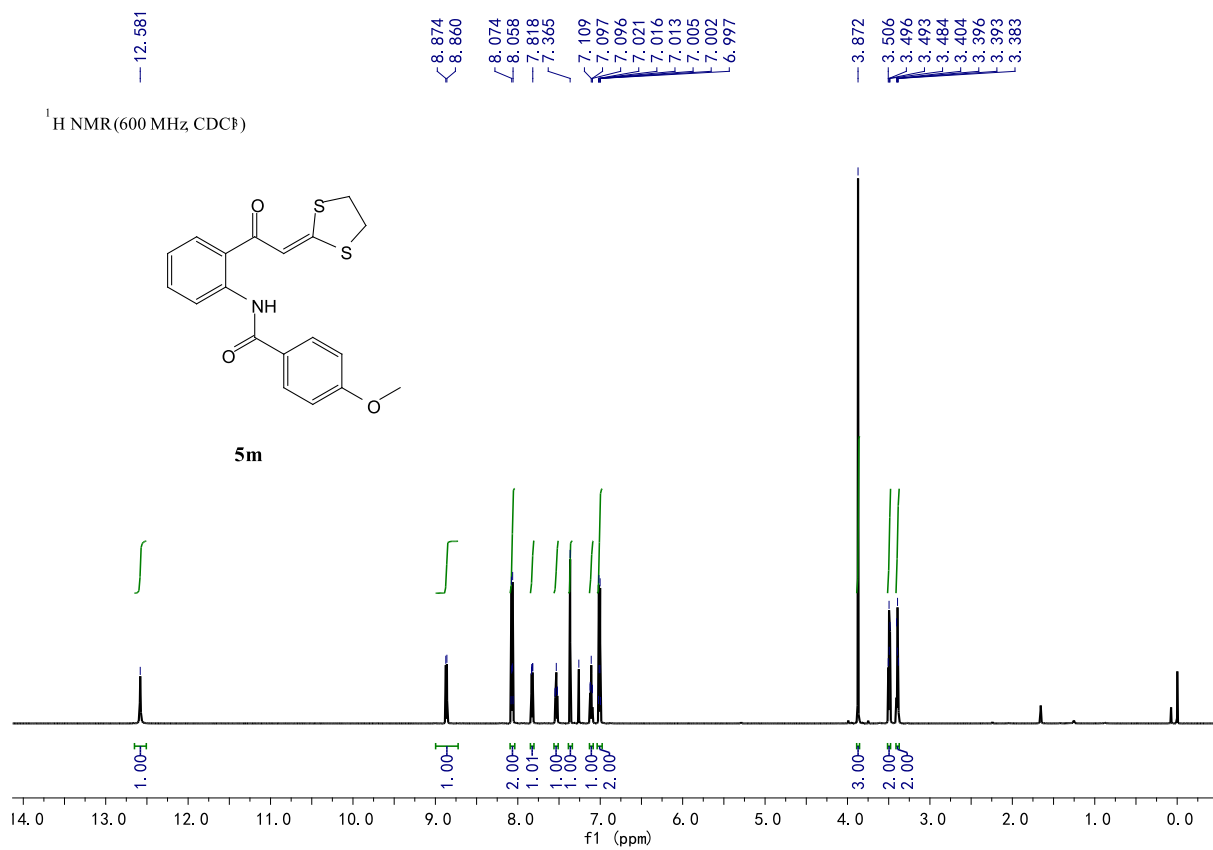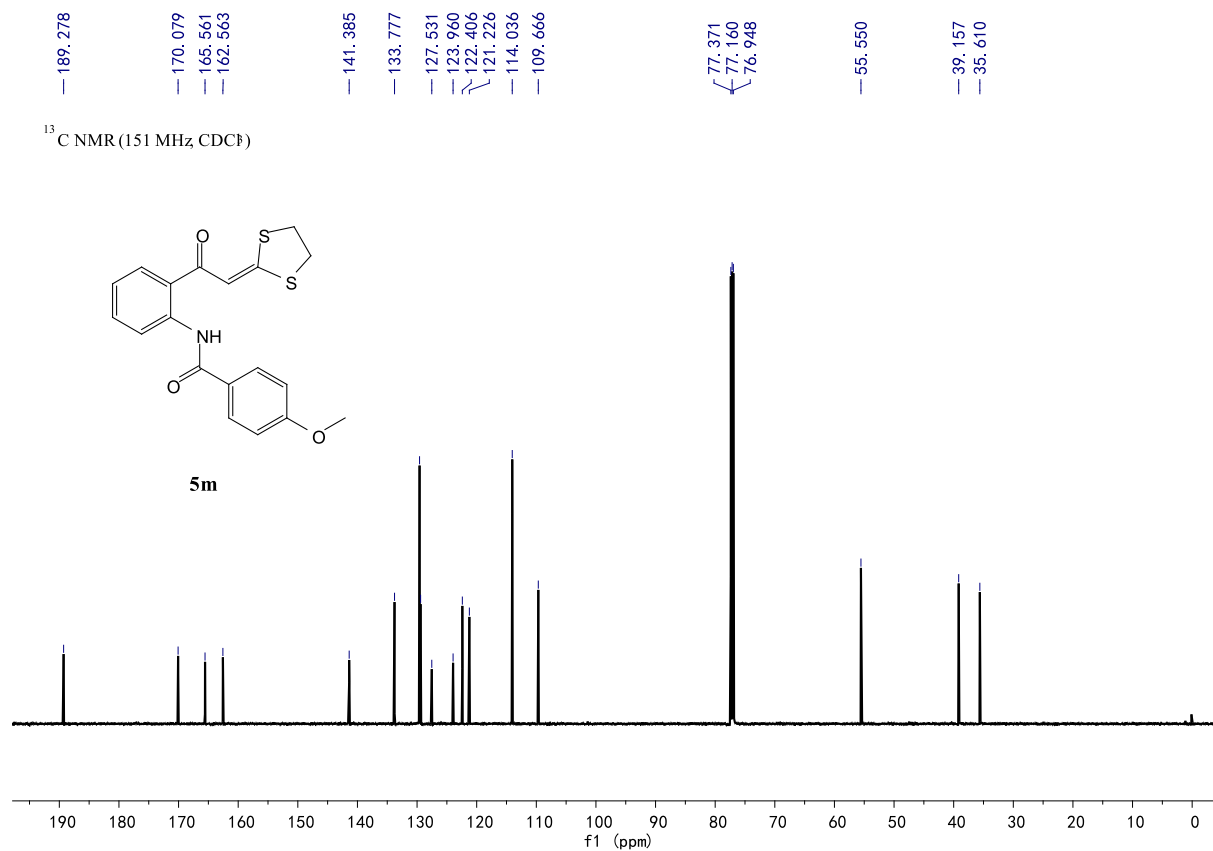

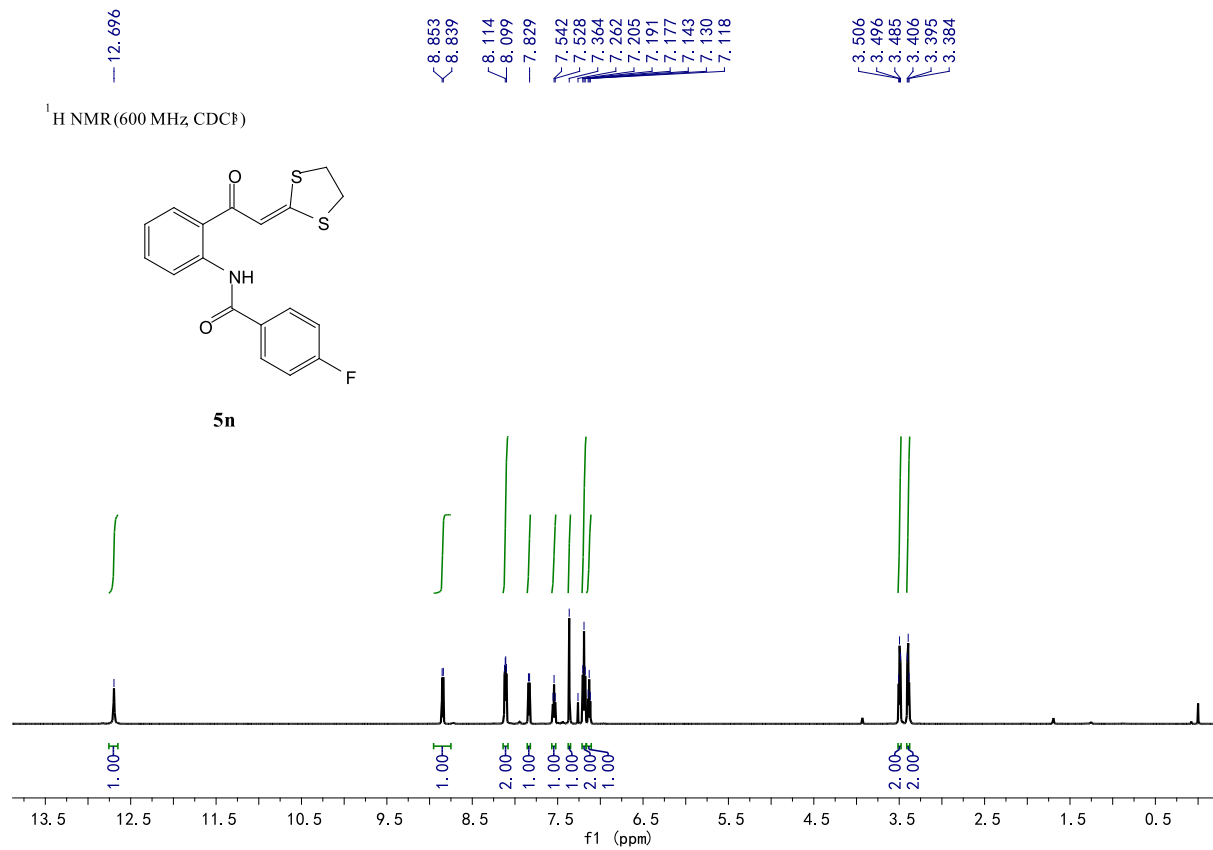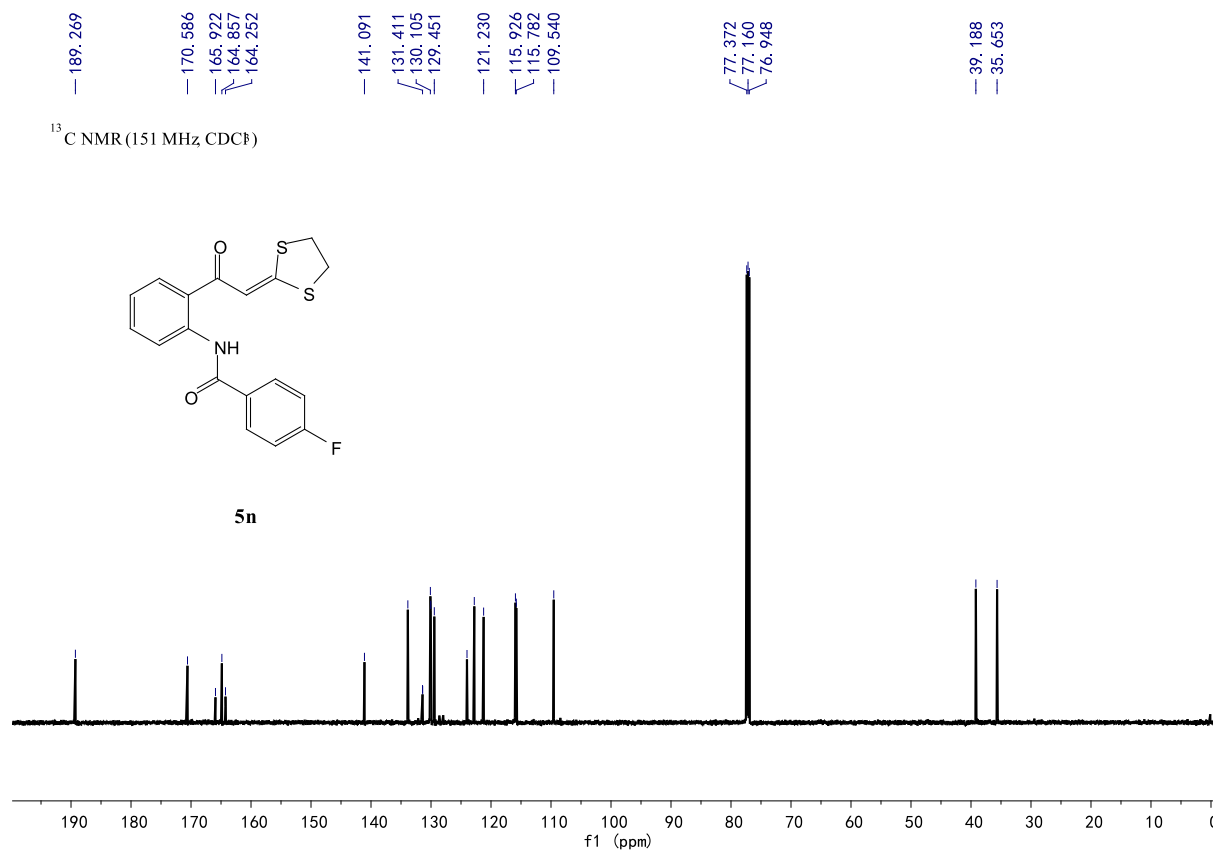

<sup>19</sup>F NMR (565 MHz CDCl<sub>3</sub>)

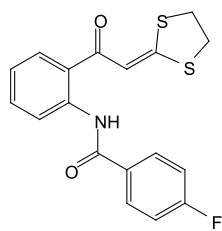

**5n**

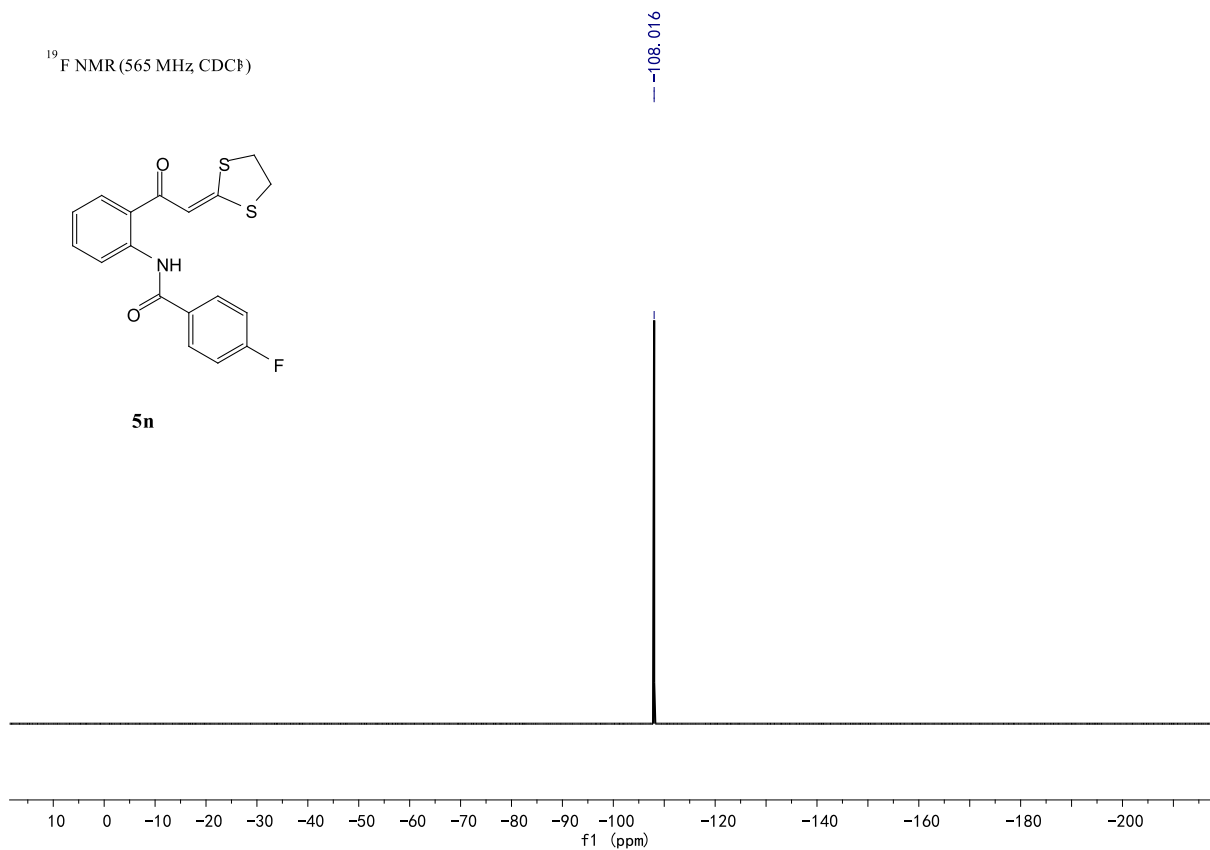

12.750

8.842  
8.828  
7.951  
7.816  
7.660  
7.651  
7.637  
7.544  
7.530  
7.518  
7.516  
7.347  
7.263  
7.136  
7.122  
7.110

3.486  
3.476  
3.465  
3.387  
3.375  
3.365

<sup>1</sup>H NMR (600 MHz CDCl<sub>3</sub>)

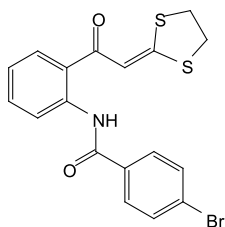

**5o**

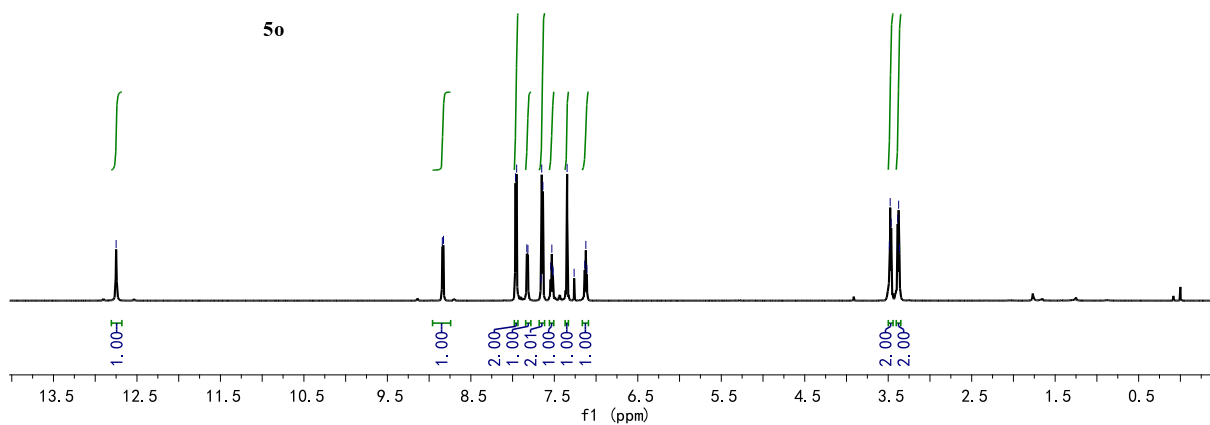

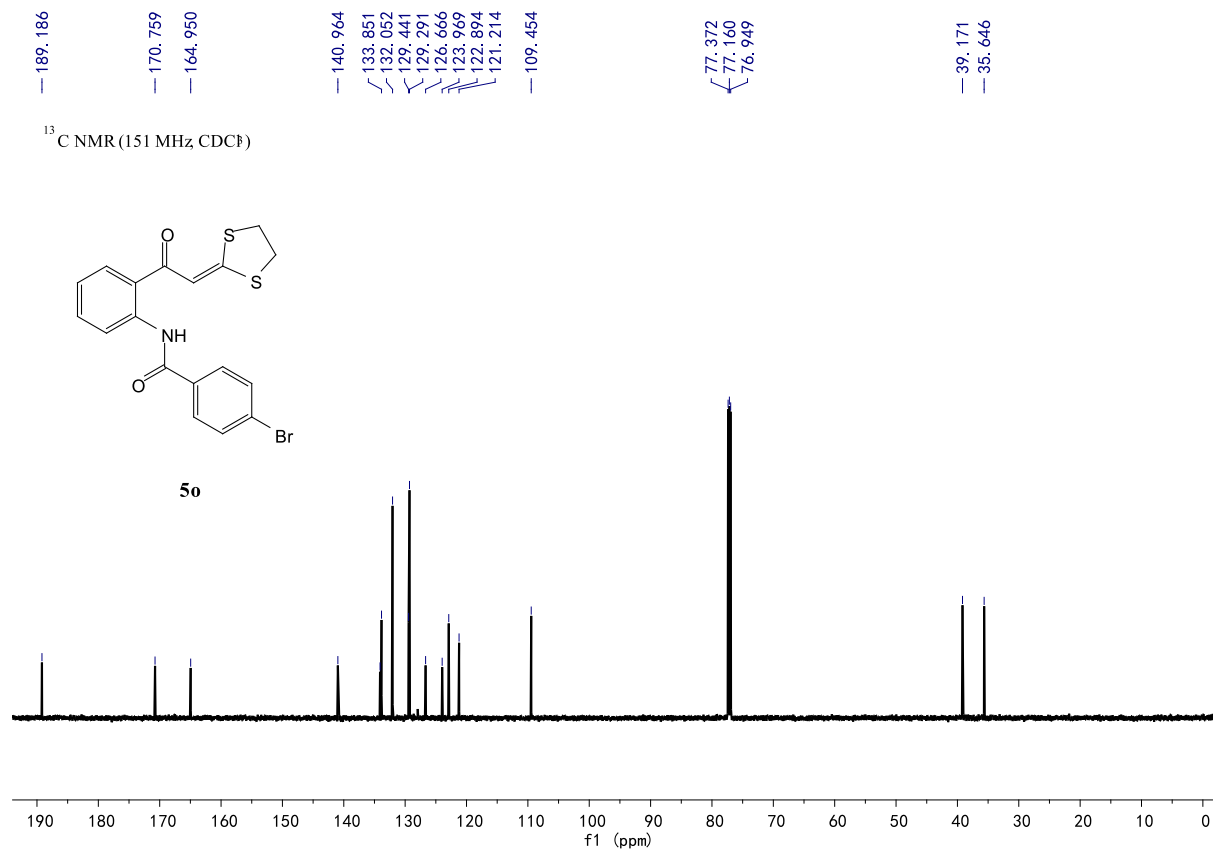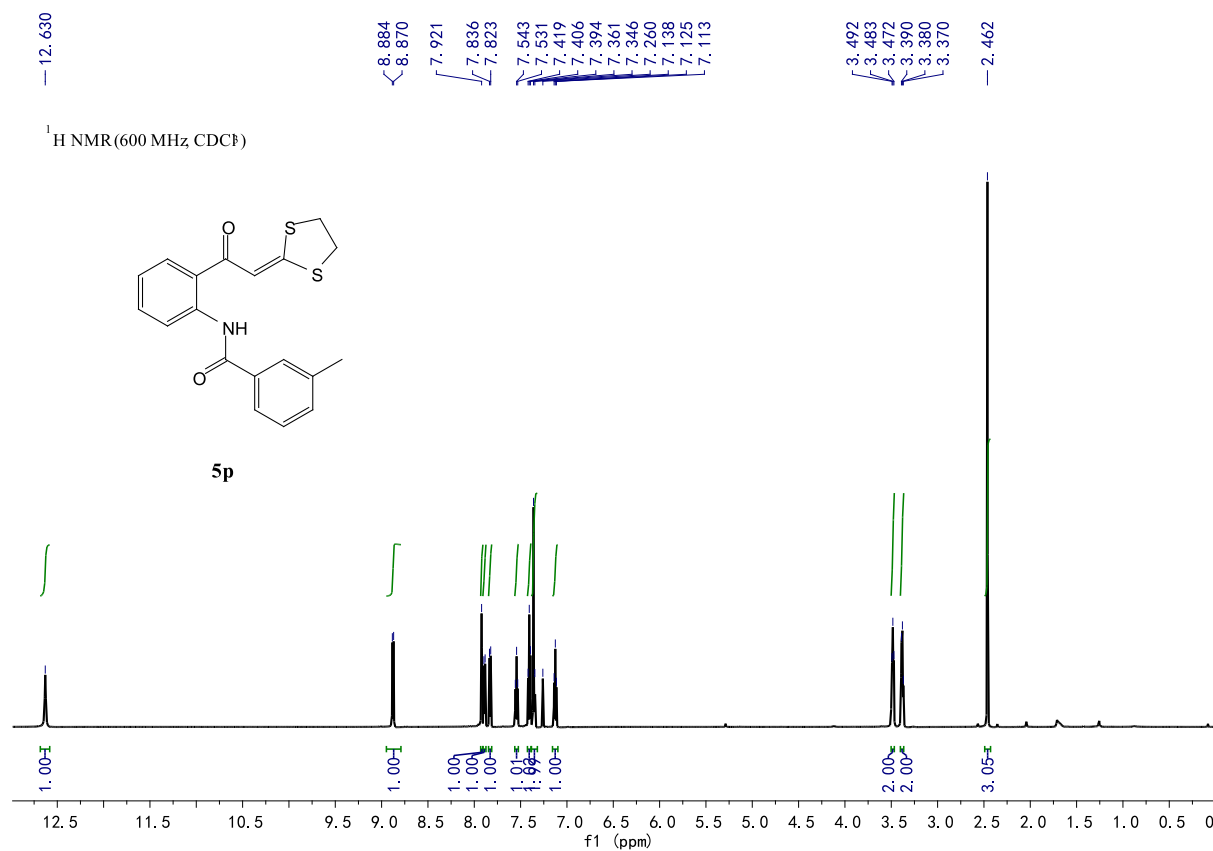

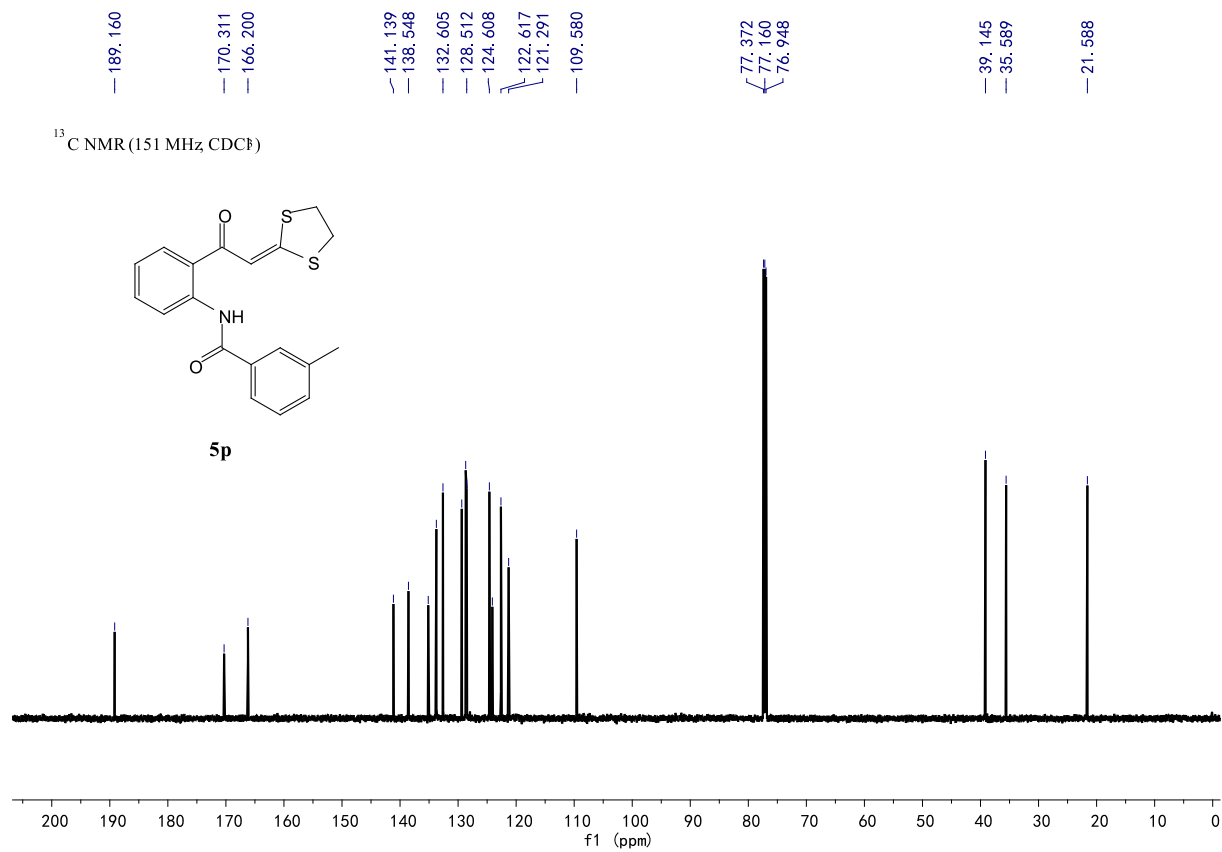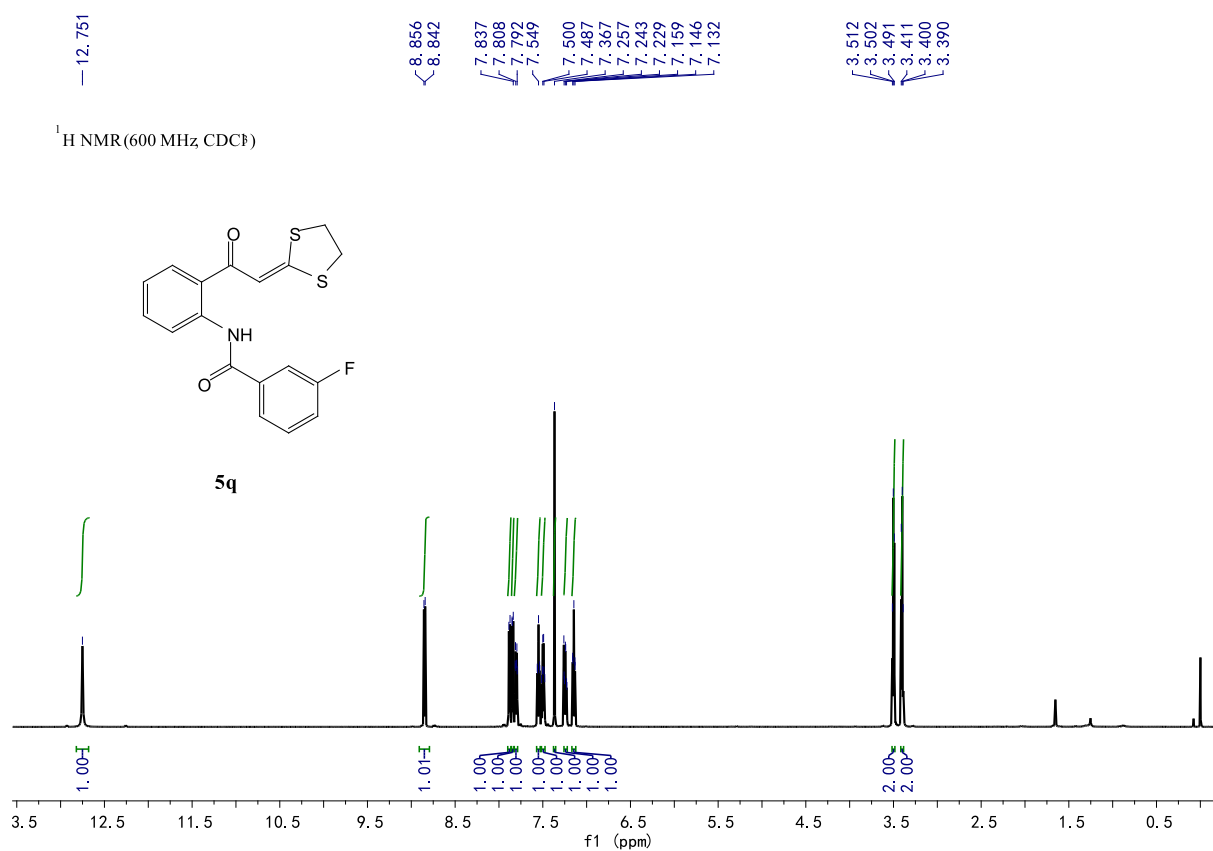

— 189.154  
 — 170.841  
 — 164.582  
 — 164.566  
 — 163.836  
 — 162.198  
 — 140.877  
 — 137.520  
 — 133.832  
 — 129.436  
 — 122.960  
 — 118.780  
 — 114.962  
 — 109.424  
 — 77.371  
 — 77.160  
 — 76.948  
 — 39.196  
 — 35.648

<sup>13</sup>C NMR (151 MHz CDCl<sub>3</sub>)

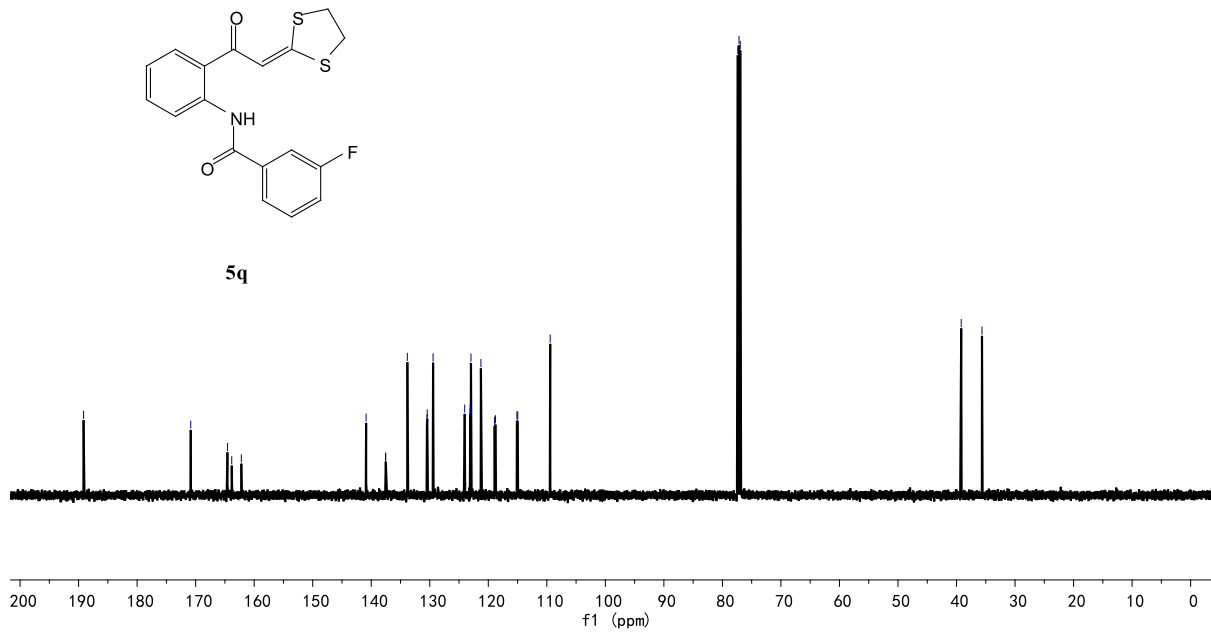

<sup>19</sup>F NMR (565 MHz CDCl<sub>3</sub>)

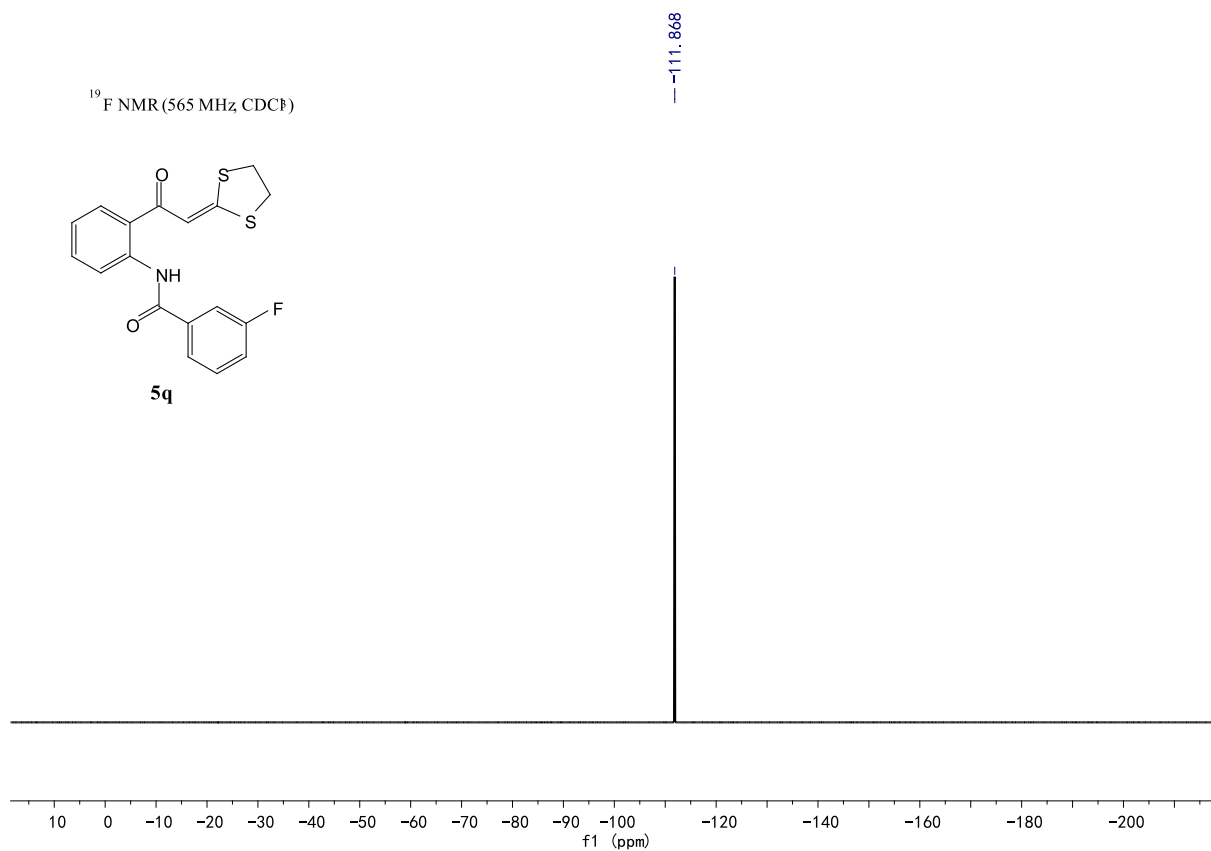

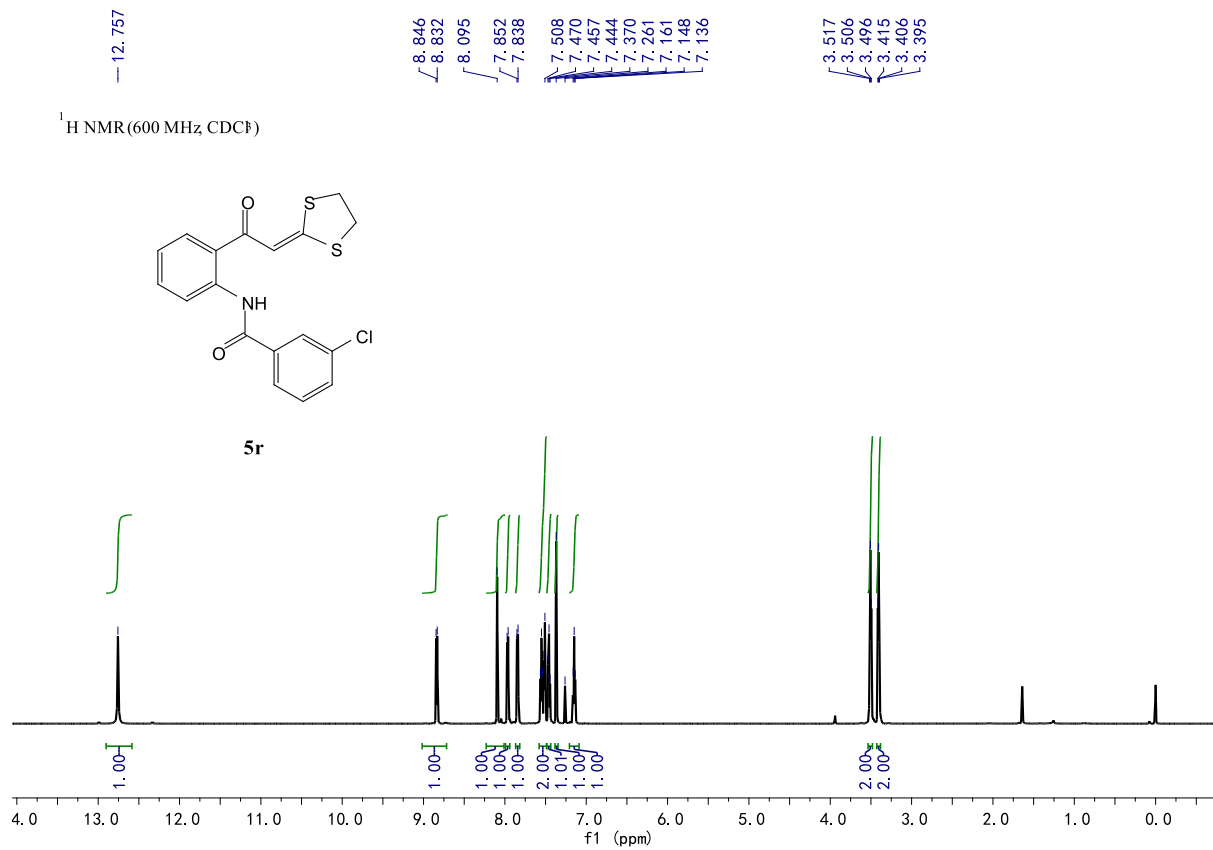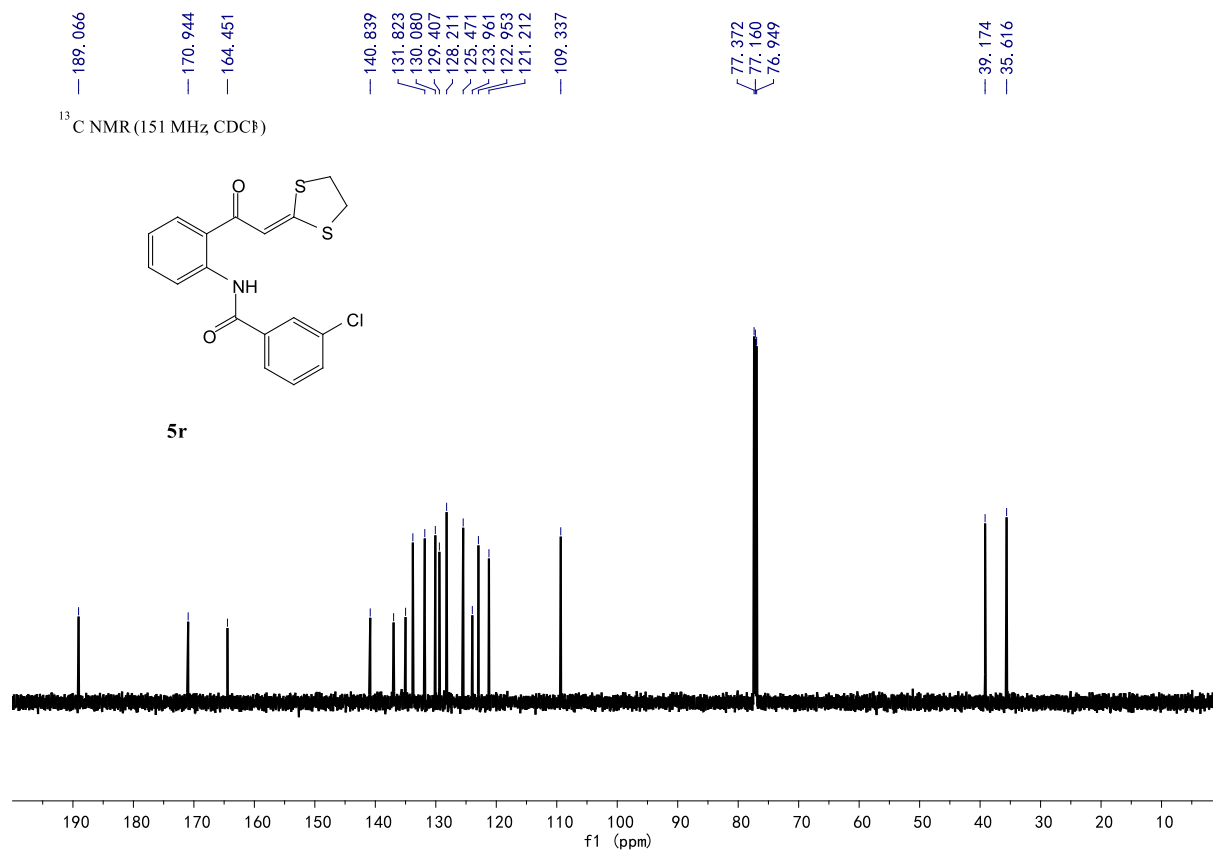

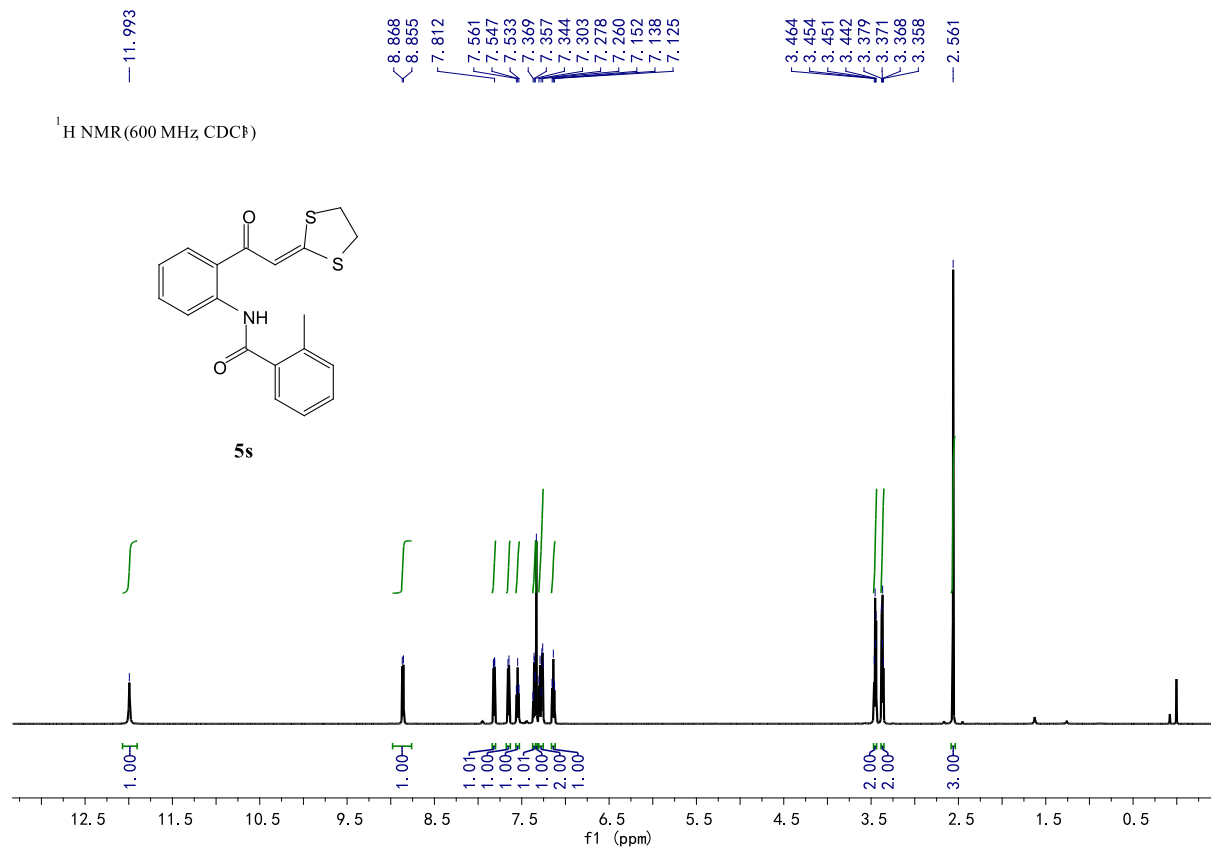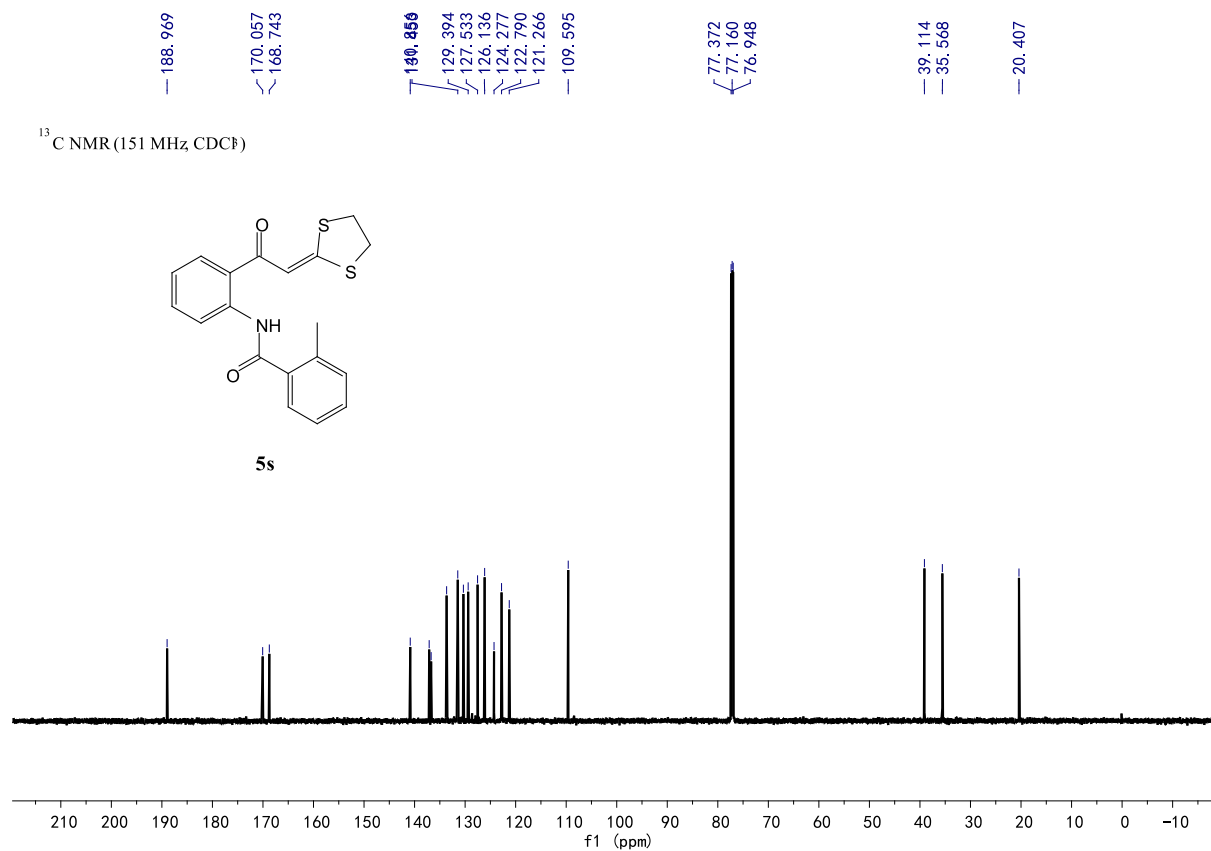



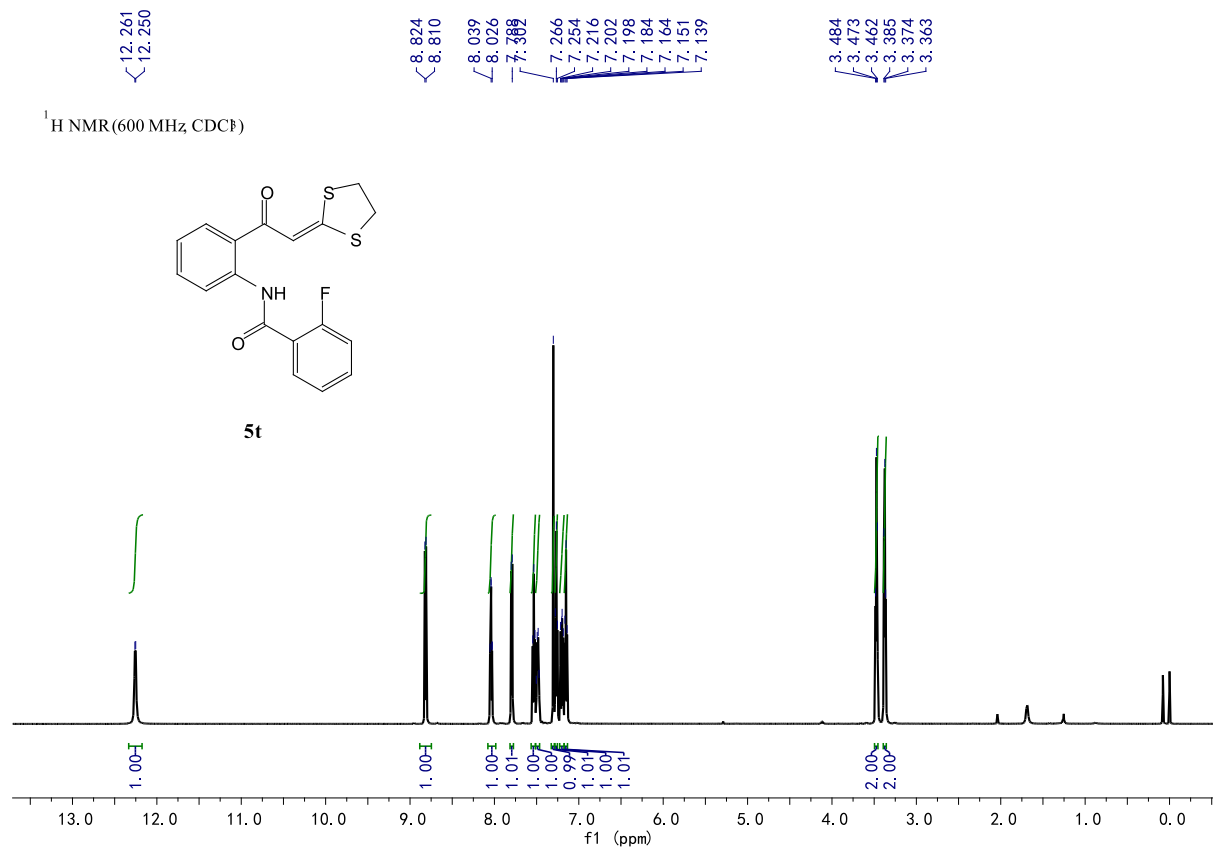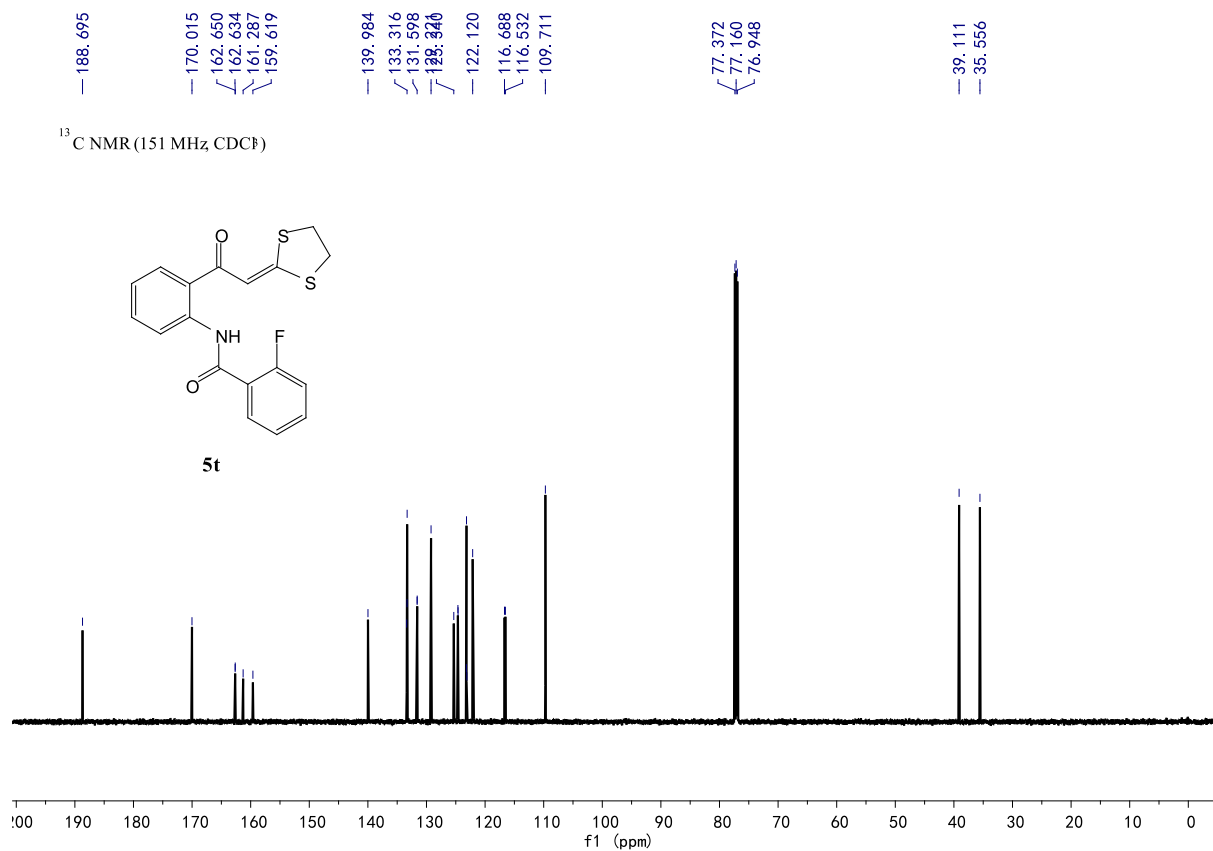

<sup>19</sup>F NMR (565 MHz, CDCl<sub>3</sub>)

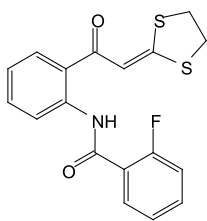

**5t**

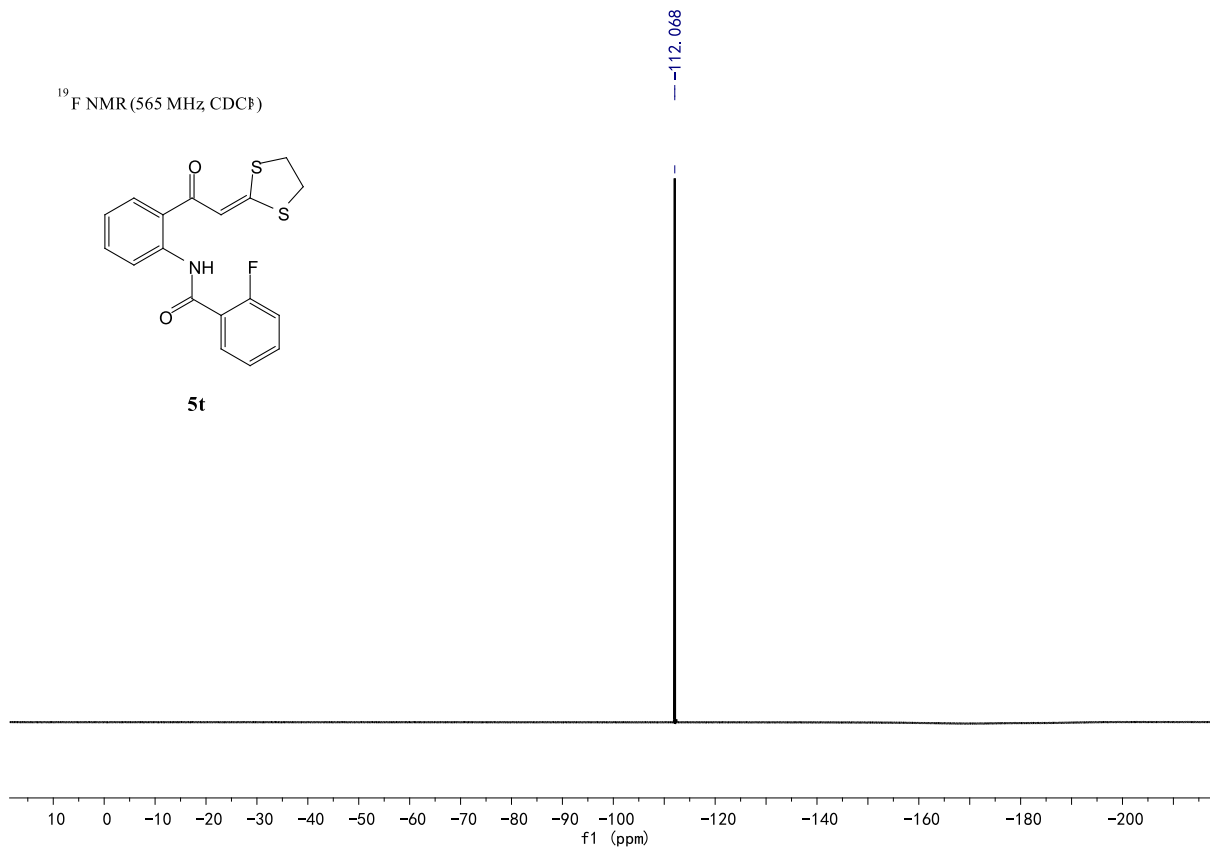

12.759

8.798  
8.797  
8.784  
7.863  
7.828  
7.814  
7.548  
7.540  
7.530  
7.506  
7.360  
7.162  
7.154  
7.123  
7.109  
7.096

3.502  
3.492  
3.489  
3.480  
3.402  
3.393  
3.380

<sup>1</sup>H NMR (600 MHz, CDCl<sub>3</sub>)

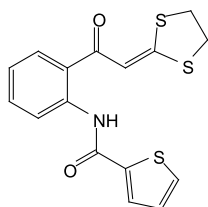

**5u**

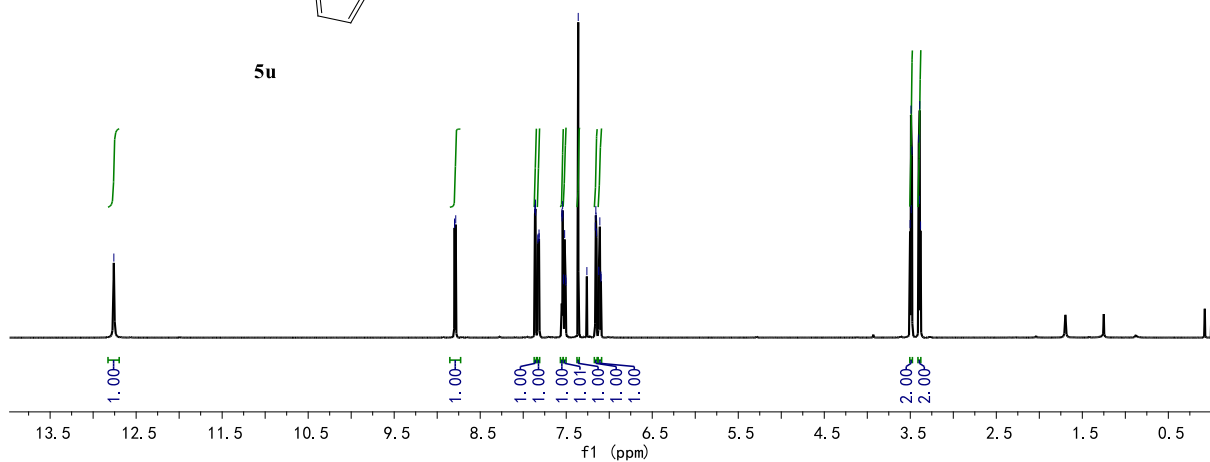

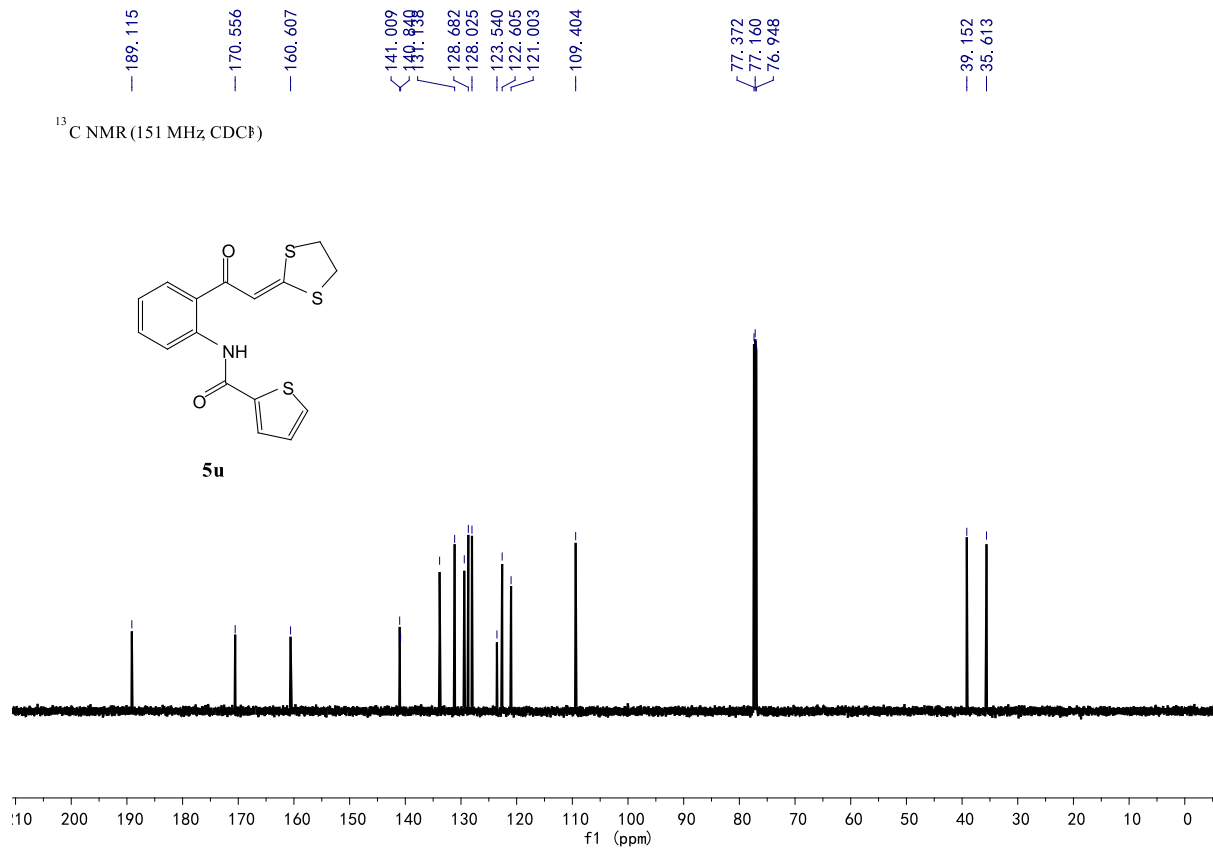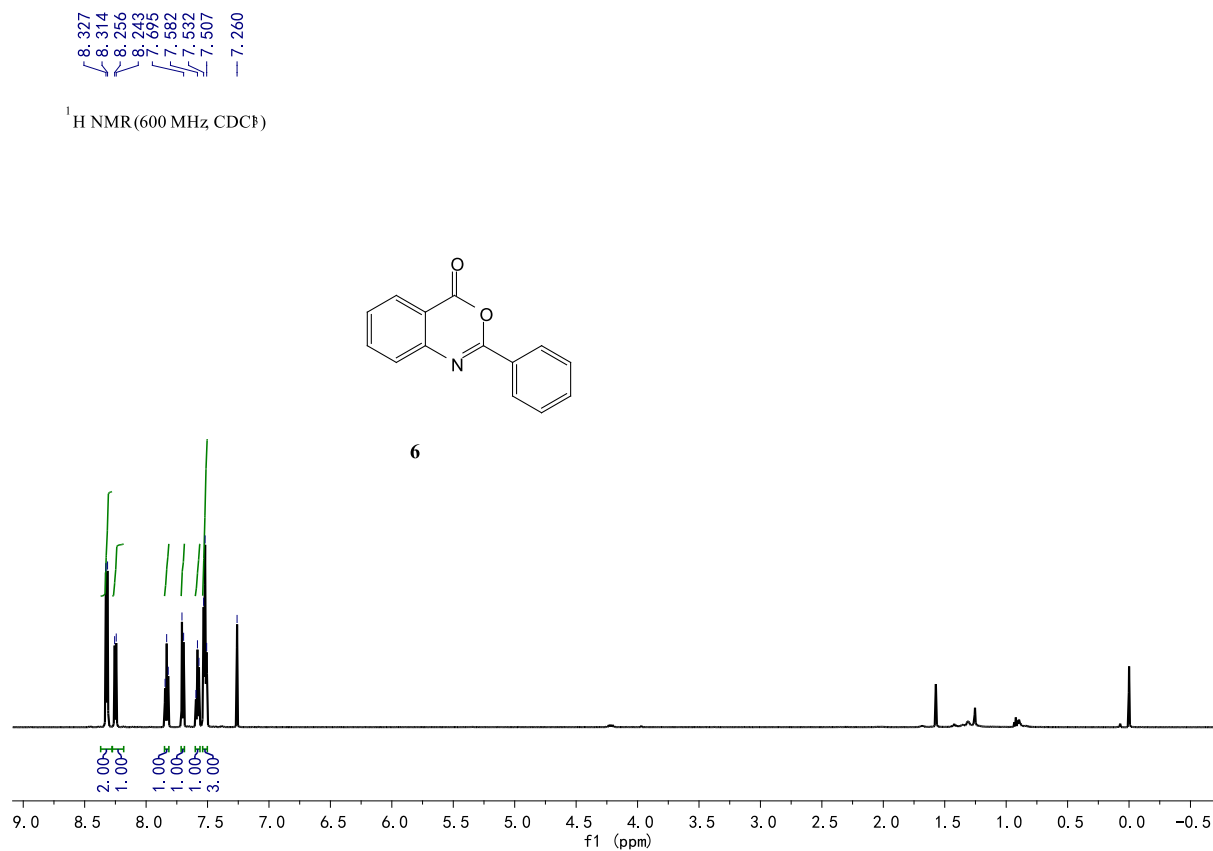

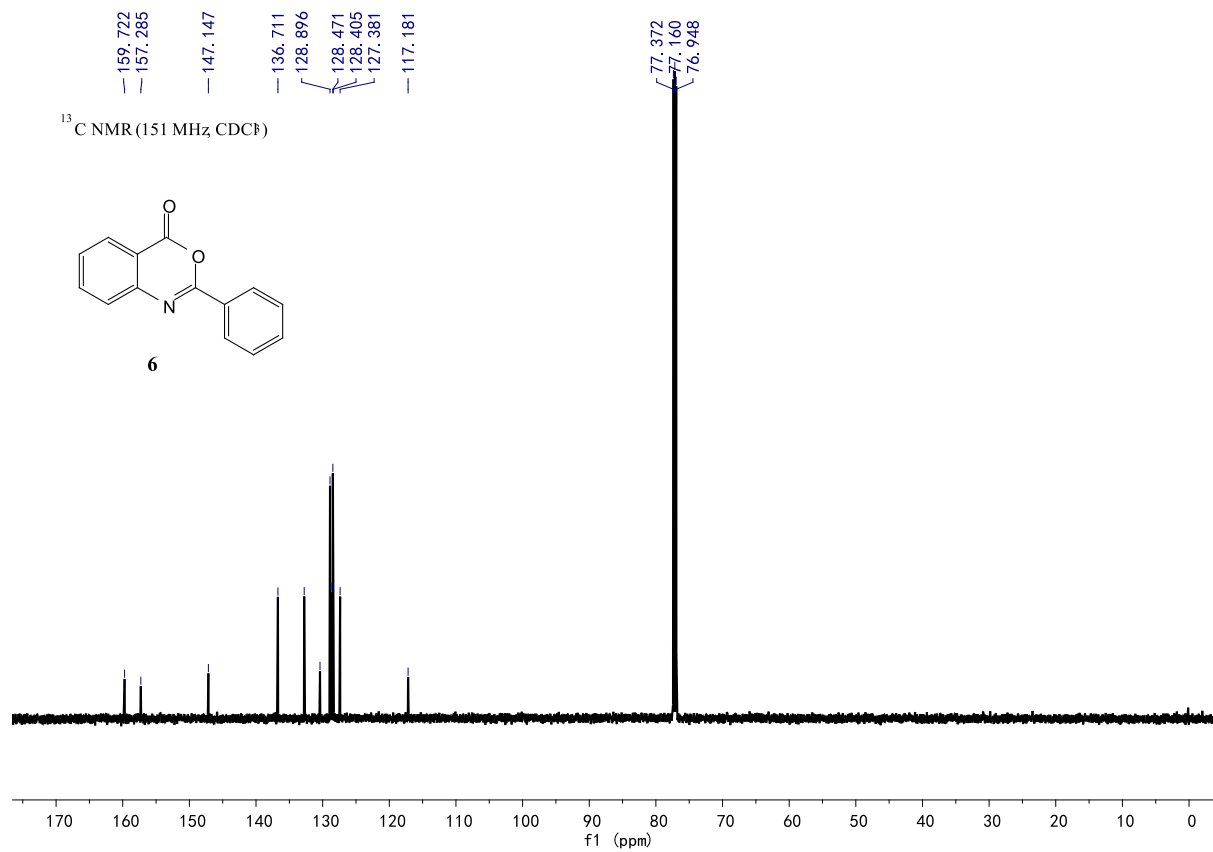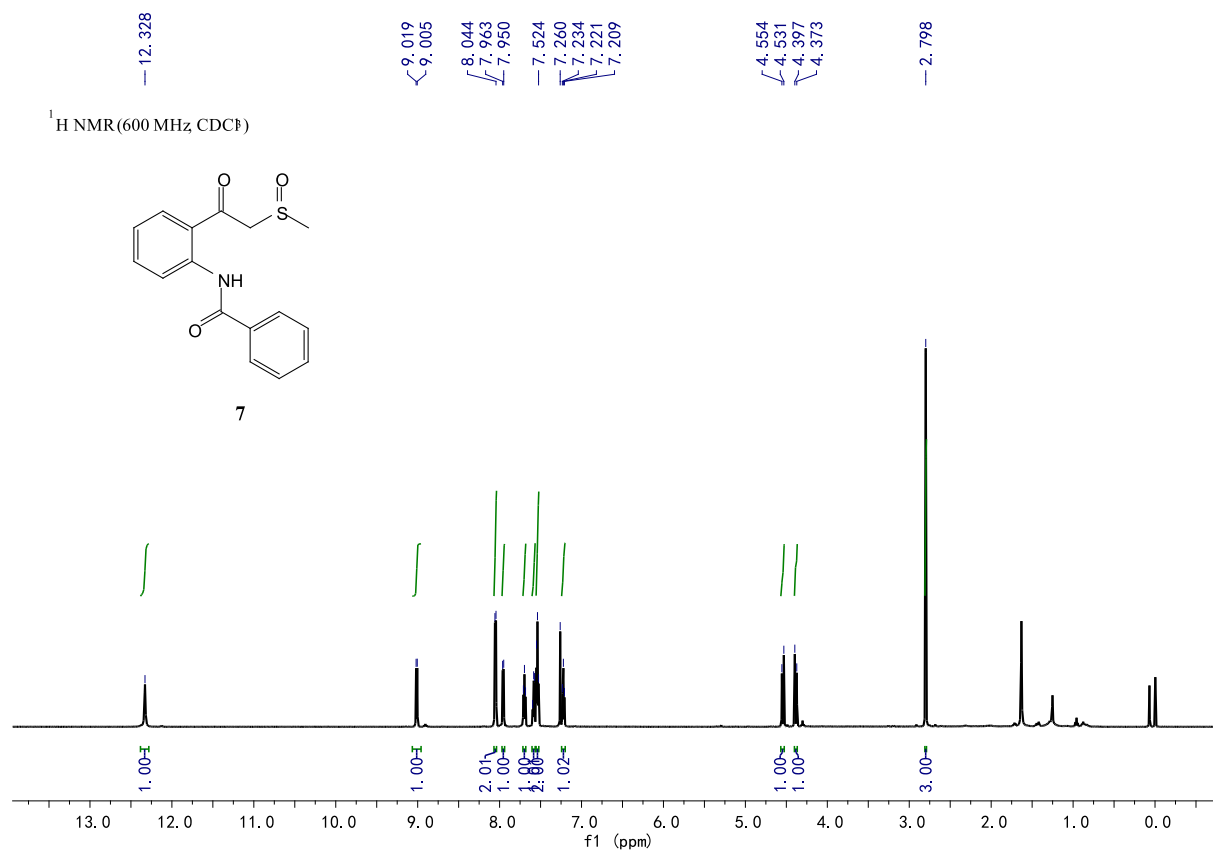

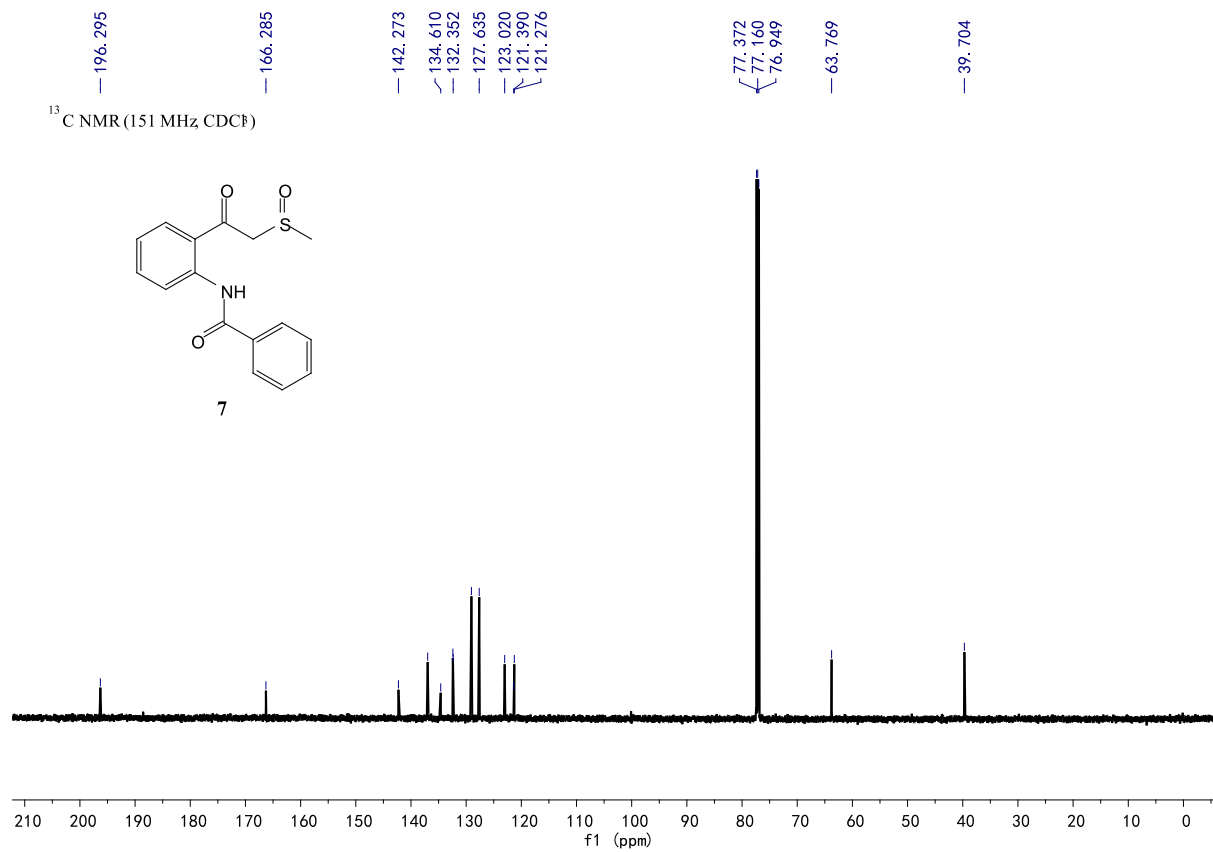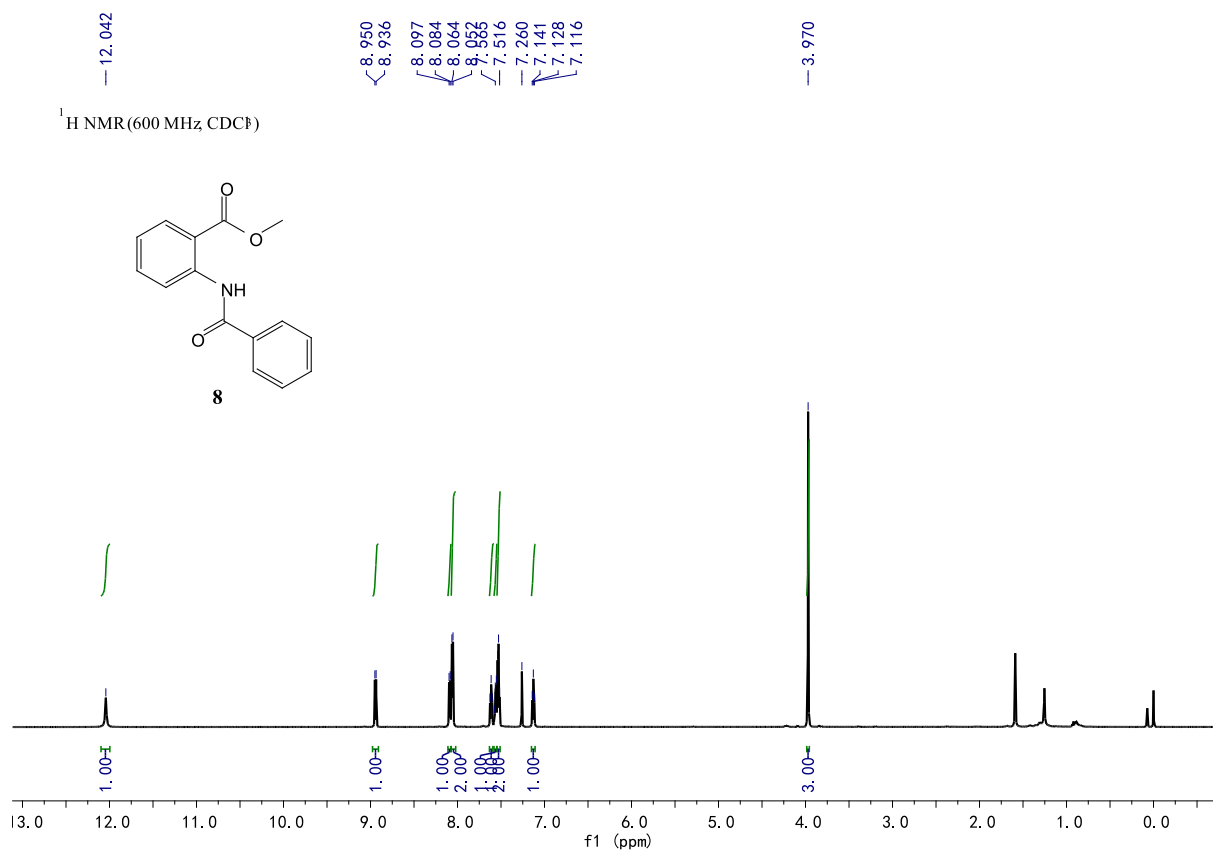

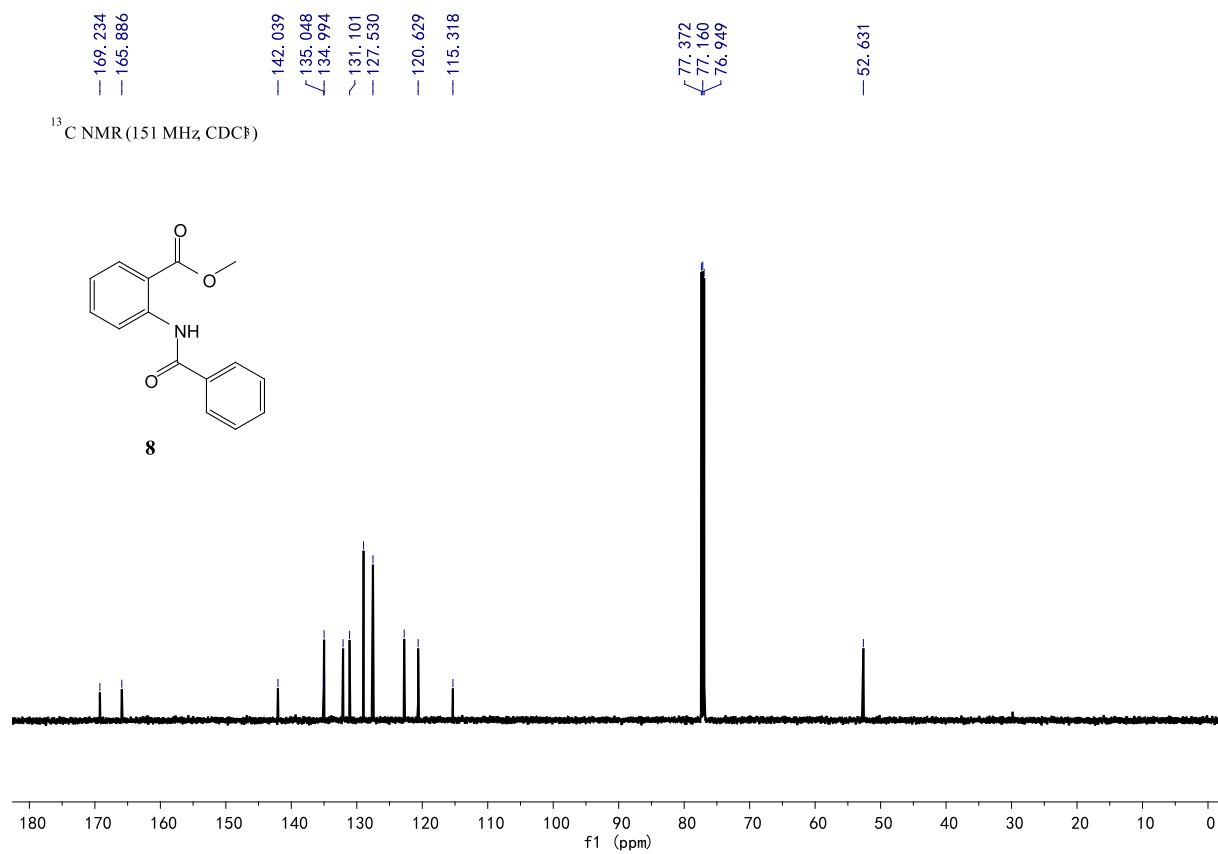

## References:

- [1] C. Zhou, F. Fang, Y. Cheng, Y. Li, H. Liu, Y. Zhou, *Adv. Synth. Catal.*, 2018, **360**(13), 2546.
- [2] V. Bizet, L. Buglioni, C. Bolm, *Angew. Chem. Int. Ed.*, 2014, **53**(22), 5639.
- [3] M. Wang, L. Kong, Q. Wu, X. Li, *Org. Lett.*, 2018, **20**(15), 4597.
